# Supplementary material for: Defining the Baseline and Oxidant Perturbed Lipidomic Profiles of Daphnia magna
Source: MDPI journal article supplement (doi:10.3390/metabo7010011), 2017-03-15
Supplement: s1 [file s1]

Table S4. Summary of the top 20 (ranked according to the greatest fold change) putatively identified lipids of *D. magna* exposed to air *in vitro*.

| Observed  |                                | Statistics               |                      | Annotation        |            |                                    |                               |                                                                                                                                                                                                                                        |
|-----------|--------------------------------|--------------------------|----------------------|-------------------|------------|------------------------------------|-------------------------------|----------------------------------------------------------------------------------------------------------------------------------------------------------------------------------------------------------------------------------------|
| mz        | Average intensity <sup>a</sup> | Fold change <sup>b</sup> | p-value <sup>c</sup> | Empirical formula | Ion form   | Theoretical mass (Da) <sup>d</sup> | Mass error (ppm) <sup>e</sup> | Putative ID                                                                                                                                                                                                                            |
| 415.32123 | 1.53E+05                       | 122.5                    | 0.000                | C25H40O           | [M+Hac-H]- | 415.32177                          | -1.3                          | [('(-)-Ceriferol 1', '26,27-bisnor-22-dehydro-cholesterol']                                                                                                                                                                            |
| 415.32123 | 1.53E+05                       | 122.5                    | 0.000                | C27H44O3          | [M-H]-     | 415.32177                          | -1.3                          | Too many to list explicitly (see Table S3)                                                                                                                                                                                             |
| 766.50331 | 9.86E+04                       | 78.9                     | 0.000                | C42H74NO9P        | [M-H]-     | 766.50285                          | 0.61                          | ['PS(O-16:0/20:5(5Z,8Z,11Z,14Z,17Z))', 'PS(P-16:0/20:4(5Z,8Z,11Z,14Z))', 'PS(P-18:0/18:4(6Z,9Z,12Z,15Z))']                                                                                                                             |
| 335.18703 | 8.23E+04                       | 66.0                     | 0.002                | C17H24O3          | [M+Hac-H]- | 335.18640                          | 1.88                          | ['Sugeonyl acetate']                                                                                                                                                                                                                   |
| 764.48728 | 8.05E+04                       | 64.5                     | 0.000                | C42H72NO9P        | [M-H]-     | 764.48720                          | 0.11                          | ['PS(P-16:0/20:5(5Z,8Z,11Z,14Z,17Z))']                                                                                                                                                                                                 |
| 664.41983 | 6.90E+04                       | 55.2                     | 0.000                | C33H64NO10P       | [M-H]-     | 664.41951                          | 0.48                          | ['PC(16:0/9:0(COOH))', 'PS(12:0/15:0)', 'PS(13:0/14:0)', 'PS(14:0/13:0)', 'PS(15:0/12:0)']                                                                                                                                             |
| 664.41983 | 6.90E+04                       | 55.2                     | 0.000                | C31H60NO8P        | [M+Hac-H]- | 664.41951                          | 0.48                          | ['PE(12:0/14:1(9Z))', 'PE(14:1(9Z)/12:0)']                                                                                                                                                                                             |
| 381.26457 | 5.66E+04                       | 45.3                     | 0.000                | C22H38O5          | [M-H]-     | 381.26465                          | -0.21                         | ['14-F2-dihomo-IsoP', '16,16-dimethyl-PGE1', '16,16-dimethyl-PGF2beta', '17-F2-dihomo-IsoP', '1a,1b-dihomo-PGE1', '1a,1b-dihomo-PGF2alpha', '20-ethyl PGF2alpha', '7-F2-dihomo-IsoP', 'Carboprost methyl (USAN)', 'Unoprostone (INN)'] |
| 381.26457 | 5.66E+04                       | 45.3                     | 0.000                | C20H34O3          | [M+Hac-H]- | 381.26465                          | -0.21                         | ['(+)-Villanovane-13alpha,19-diol', '(-)-2,7-Dolabelladiene-6beta,10alpha,18-triol', '(-)-Spongiane-15,16-diol', '12R-HETRe', '15(S)-Hydroxyeicosatrienoic acid', '5S-HETRe', '8S-HETRe']                                              |
| 768.51926 | 5.60E+04                       | 44.8                     | 0.000                | C42H76NO9P        | [M-H]-     | 768.51850                          | 0.99                          | ['PS(O-16:0/20:4(5Z,8Z,11Z,14Z))', 'PS(O-18:0/18:4(6Z,9Z,12Z,15Z))', 'PS(P-16:0/20:3(8Z,11Z,14Z))', 'PS(P-18:0/18:3(6Z,9Z,12Z))', 'PS(P-18:0/18:3(9Z,12Z,15Z))']                                                                       |
| 433.33177 | 4.98E+04                       | 39.9                     | 0.000                | C27H46O4          | [M-H]-     | 433.33233                          | -1.3                          | Too many to list explicitly (see Table S3)                                                                                                                                                                                             |
| 433.33177 | 4.98E+04                       | 39.9                     | 0.000                | C25H42O2          | [M+Hac-H]- | 433.33233                          | -1.3                          | ['Dolichoic acid-[18-20]']                                                                                                                                                                                                             |

|           |          |      |       |             |            |           |       |                                                                                                                                                                                                                                                                                                                                                                                                                                                                                                                                      |
|-----------|----------|------|-------|-------------|------------|-----------|-------|--------------------------------------------------------------------------------------------------------------------------------------------------------------------------------------------------------------------------------------------------------------------------------------------------------------------------------------------------------------------------------------------------------------------------------------------------------------------------------------------------------------------------------------|
| 870.54950 | 4.72E+04 | 37.7 | 0.000 | C44H78NO10P | [M+Hac-H]- | 870.55019 | -0.79 | ['PS(16:0/22:4(7Z,10Z,13Z,16Z))', 'PS(18:0/20:4(5Z,8Z,11Z,14Z))', 'PS(18:1(9Z)/20:3(8Z,11Z,14Z))', 'PS(18:2(9Z,12Z)/20:2(11Z,14Z))', 'PS(18:3(6Z,9Z,12Z)/20:1(11Z))', 'PS(18:3(9Z,12Z,15Z)/20:1(11Z))', 'PS(18:4(6Z,9Z,12Z,15Z)/20:0)', 'PS(20:0/18:4(6Z,9Z,12Z,15Z))', 'PS(20:1(11Z)/18:3(6Z,9Z,12Z))', 'PS(20:1(11Z)/18:3(9Z,12Z,15Z))', 'PS(20:2(11Z,14Z)/18:2(9Z,12Z))', 'PS(20:3(8Z,11Z,14Z)/18:1(9Z))', 'PS(20:4(5Z,8Z,11Z,14Z)/18:0)', 'PS(22:4(7Z,10Z,13Z,16Z)/16:0)']                                                       |
| 767.50647 | 4.69E+04 | 37.5 | 0.000 | C37H73O10P  | [M+Hac-H]- | 767.50799 | -1.98 | ['PG(12:0/19:0)', 'PG(13:0/18:0)', 'PG(14:0/17:0)', 'PG(15:0/16:0)', 'PG(16:0/15:0)', 'PG(17:0/14:0)', 'PG(18:0/13:0)', 'PG(19:0/12:0)']                                                                                                                                                                                                                                                                                                                                                                                             |
| 767.50647 | 4.69E+04 | 37.5 | 0.000 | C39H77O12P  | [M-H]-     | 767.50799 | -1.98 | ['PI(O-16:0/14:0)', 'PI(O-18:0/12:0)']                                                                                                                                                                                                                                                                                                                                                                                                                                                                                               |
| 868.53355 | 4.16E+04 | 33.3 | 0.000 | C44H76NO10P | [M+Hac-H]- | 868.53454 | -1.14 | ['PS(16:1(9Z)/22:4(7Z,10Z,13Z,16Z))', 'PS(18:0/20:5(5Z,8Z,11Z,14Z,17Z))', 'PS(18:1(9Z)/20:4(5Z,8Z,11Z,14Z))', 'PS(18:2(9Z,12Z)/20:3(8Z,11Z,14Z))', 'PS(18:3(6Z,9Z,12Z)/20:2(11Z,14Z))', 'PS(18:3(9Z,12Z,15Z)/20:2(11Z,14Z))', 'PS(18:4(6Z,9Z,12Z,15Z)/20:1(11Z))', 'PS(20:1(11Z)/18:4(6Z,9Z,12Z,15Z))', 'PS(20:2(11Z,14Z)/18:3(6Z,9Z,12Z))', 'PS(20:2(11Z,14Z)/18:3(9Z,12Z,15Z))', 'PS(20:3(8Z,11Z,14Z)/18:2(9Z,12Z))', 'PS(20:4(5Z,8Z,11Z,14Z)/18:1(9Z))', 'PS(20:5(5Z,8Z,11Z,14Z,17Z)/18:0)', 'PS(22:4(7Z,10Z,13Z,16Z)/16:1(9Z))'] |
| 580.28909 | 3.57E+04 | 28.6 | 0.004 | C24H44NO9P  | [M+Hac-H]- | 580.28923 | -0.23 | ['PS(18:2(9Z,12Z)/0:0)']                                                                                                                                                                                                                                                                                                                                                                                                                                                                                                             |
| 780.51851 | 2.94E+04 | 23.6 | 0.000 | C41H72NO7P  | [M+Hac-H]- | 780.51850 | 0.02  | ['PE(P-16:0/20:5(5Z,8Z,11Z,14Z,17Z))']                                                                                                                                                                                                                                                                                                                                                                                                                                                                                               |
| 499.30616 | 2.81E+04 | 22.6 | 0.000 | C30H44O6    | [M-H]-     | 499.30651 | -0.71 | ['Hippuristanolide']                                                                                                                                                                                                                                                                                                                                                                                                                                                                                                                 |
| 846.54966 | 2.76E+04 | 22.2 | 0.006 | C42H78NO10P | [M+Hac-H]- | 846.55019 | -0.63 | ['PS(14:0/22:2(13Z,16Z))', 'PS(14:1(9Z)/22:1(11Z))', 'PS(16:0/20:2(11Z,14Z))', 'PS(16:1(9Z)/20:1(11Z))', 'PS(17:1(9Z)/19:1(9Z))', 'PS(17:2(9Z,12Z)/19:0)', 'PS(18:0/18:2(9Z,12Z))', 'PS(18:1(9Z)/18:1(9Z))', 'PS(18:2(9Z,12Z)/18:0)', 'PS(19:0/17:2(9Z,12Z))', 'PS(19:1(9Z)/17:1(9Z))', 'PS(20:1(11Z)/16:1(9Z))', 'PS(20:2(11Z,14Z)/16:0)', 'PS(22:1(11Z)/14:1(9Z))', 'PS(22:2(13Z,16Z)/14:0)']                                                                                                                                      |
| 694.44617 | 2.15E+04 | 17.2 | 0.000 | C38H66NO8P  | [M-H]-     | 694.44533 | 1.21  | ['PE(13:0/20:5(5Z,8Z,11Z,14Z,17Z))', 'PE(15:1(9Z)/18:4(6Z,9Z,12Z,15Z))', 'PE(18:4(6Z,9Z,12Z,15Z)/15:1(9Z))', 'PE(20:5(5Z,8Z,11Z,14Z,17Z)/13:0)']                                                                                                                                                                                                                                                                                                                                                                                     |
| 770.53492 | 2.10E+04 | 16.8 | 0.000 | C42H78NO9P  | [M-H]-     | 770.53415 | 1.01  | ['PS(O-16:0/20:3(8Z,11Z,14Z))', 'PS(O-18:0/18:3(6Z,9Z,12Z))', 'PS(O-18:0/18:3(9Z,12Z,15Z))', 'PS(P-16:0/20:2(11Z,14Z))', 'PS(P-18:0/18:2(9Z,12Z))']                                                                                                                                                                                                                                                                                                                                                                                  |
| 341.19704 | 2.02E+04 | 16.3 | 0.001 | C18H30O6    | [M-H]-     | 341.19696 | 0.22  | ['2,3-Dinor-TXB2', '2,3-dinor, 6-keto-PGF1alpha']                                                                                                                                                                                                                                                                                                                                                                                                                                                                                    |
| 910.61750 | 1.99E+04 | 16.0 | 0.000 | C48H86NO9P  | [M+Hac-H]- | 910.61788 | -0.41 | ['PS(P-20:0/22:4(7Z,10Z,13Z,16Z))']                                                                                                                                                                                                                                                                                                                                                                                                                                                                                                  |

|           |          |      |       |            |            |           |       |                                                                                                                                                                                                                                                                                                                                                                                                                                             |
|-----------|----------|------|-------|------------|------------|-----------|-------|---------------------------------------------------------------------------------------------------------------------------------------------------------------------------------------------------------------------------------------------------------------------------------------------------------------------------------------------------------------------------------------------------------------------------------------------|
| 794.49707 | 1.86E+04 | 15.0 | 0.000 | C41H70NO8P | [M+Hac-H]- | 794.49776 | -0.87 | ['PE(14:0/22:6(4Z,7Z,10Z,13Z,16Z,19Z))',<br>'PE(16:1(9Z)/20:5(5Z,8Z,11Z,14Z,17Z))',<br>'PE(18:2(9Z,12Z)/18:4(6Z,9Z,12Z,15Z))',<br>'PE(18:3(6Z,9Z,12Z)/18:3(6Z,9Z,12Z))',<br>'PE(18:3(6Z,9Z,12Z)/18:3(9Z,12Z,15Z))',<br>'PE(18:3(9Z,12Z,15Z)/18:3(6Z,9Z,12Z))',<br>'PE(18:3(9Z,12Z,15Z)/18:3(9Z,12Z,15Z))',<br>'PE(18:4(6Z,9Z,12Z,15Z)/18:2(9Z,12Z))',<br>'PE(20:5(5Z,8Z,11Z,14Z,17Z)/16:1(9Z))',<br>'PE(22:6(4Z,7Z,10Z,13Z,16Z,19Z)/14:0)'] |
|-----------|----------|------|-------|------------|------------|-----------|-------|---------------------------------------------------------------------------------------------------------------------------------------------------------------------------------------------------------------------------------------------------------------------------------------------------------------------------------------------------------------------------------------------------------------------------------------------|

- a Average intensity across all samples (n=8 control, n=6 low dose and n=8 high dose air-exposed samples).
- b Fold change in intensity from control to *in vitro* air-exposed group.
- c From t-test between control and air-exposed groups with a false discovery rate (FDR) of 5% to correct for multiple hypothesis testing.
- d Calculated for the specified ion form of the empirical formula.
- e Error between the observed and theoretical masses, presented as parts per million of the theoretical mass.
