# Supplementary material for: Defining the Baseline and Oxidant Perturbed Lipidomic Profiles of Daphnia magna
Source: MDPI journal article supplement (doi:10.3390/metabo7010011), 2017-03-15
Supplement: s1 [file s1]

Table S7. Summary of the top 20 (with the greatest fold change) putatively identified lipids of *D. magna* exposed to CuSO<sub>4</sub> *in vivo*.

| Observed   |                                | Statistics               |                      | Annotation        |            |                                    |                               |                                                                                                                                                                                                                                                                                                                                                                                                                                                                                                                                                                                                                                                                                                                                                                                                                                                                                                                                                                                               |
|------------|--------------------------------|--------------------------|----------------------|-------------------|------------|------------------------------------|-------------------------------|-----------------------------------------------------------------------------------------------------------------------------------------------------------------------------------------------------------------------------------------------------------------------------------------------------------------------------------------------------------------------------------------------------------------------------------------------------------------------------------------------------------------------------------------------------------------------------------------------------------------------------------------------------------------------------------------------------------------------------------------------------------------------------------------------------------------------------------------------------------------------------------------------------------------------------------------------------------------------------------------------|
| <i>m/z</i> | Average intensity <sup>a</sup> | Fold change <sup>b</sup> | p-value <sup>c</sup> | Empirical formula | Ion form   | Theoretical mass (Da) <sup>d</sup> | Mass error (ppm) <sup>e</sup> | Putative ID                                                                                                                                                                                                                                                                                                                                                                                                                                                                                                                                                                                                                                                                                                                                                                                                                                                                                                                                                                                   |
| 443.31298  | 3.30E+04                       | 8.1                      | 0.001                | C21H40N2O4        | [M+Hac-H]- | 443.312662                         | 0.72                          | ['N-palmitoyl glutamine']                                                                                                                                                                                                                                                                                                                                                                                                                                                                                                                                                                                                                                                                                                                                                                                                                                                                                                                                                                     |
| 443.33810  | 1.96E+04                       | 2.9                      | 0.720                | C23H44O4          | [M+Hac-H]- | 443.337814                         | 0.65                          | ['Tricosanedioic acid']                                                                                                                                                                                                                                                                                                                                                                                                                                                                                                                                                                                                                                                                                                                                                                                                                                                                                                                                                                       |
| 476.27807  | 1.43E+05                       | 2.0                      | 0.166                | C28H41NO4         | [M+Na-2H]- | 476.278228                         | -0.33                         | ['15-HETE-DA', '15-HETE-VA']                                                                                                                                                                                                                                                                                                                                                                                                                                                                                                                                                                                                                                                                                                                                                                                                                                                                                                                                                                  |
| 476.27807  | 1.43E+05                       | 2.0                      | 0.166                | C23H44NO7P        | [M-H]-     | 476.278266                         | -0.41                         | ['LysoPE(18:2(9Z,12Z)/0:0)']                                                                                                                                                                                                                                                                                                                                                                                                                                                                                                                                                                                                                                                                                                                                                                                                                                                                                                                                                                  |
| 512.29920  | 2.57E+04                       | 1.9                      | 0.817                | C21H44NO7P        | [M+Hac-H]- | 512.299396                         | -0.38                         | ['LysoPE(16:0/0:0)', 'PC(13:0/0:0)']                                                                                                                                                                                                                                                                                                                                                                                                                                                                                                                                                                                                                                                                                                                                                                                                                                                                                                                                                          |
| 492.36191  | 3.40E+04                       | 1.9                      | 0.720                | C30H51NO2         | [M+Cl]-    | 492.361381                         | 1.08                          | ['3-O-Aminopropyl-25-hydroxyvitamin D3']                                                                                                                                                                                                                                                                                                                                                                                                                                                                                                                                                                                                                                                                                                                                                                                                                                                                                                                                                      |
| 854.59165  | 3.88E+03                       | 1.9                      | 0.749                | C45H82NO8P        | [M+Hac-H]- | 854.591661                         | -0.01                         | ['PC(15:0/22:4(7Z,10Z,13Z,16Z))', 'PC(17:0/20:4(5Z,8Z,11Z,14Z))', 'PC(17:1(9Z)/20:3(8Z,11Z,14Z))', 'PC(17:2(9Z,12Z)/20:2(11Z,14Z))', 'PC(18:3(6Z,9Z,12Z)/19:1(9Z))', 'PC(18:3(9Z,12Z,15Z)/19:1(9Z))', 'PC(18:4(6Z,9Z,12Z,15Z)/19:0)', 'PC(19:0/18:4(6Z,9Z,12Z,15Z))', 'PC(19:1(9Z)/18:3(6Z,9Z,12Z))', 'PC(19:1(9Z)/18:3(9Z,12Z,15Z))', 'PC(20:2(11Z,14Z)/17:2(9Z,12Z))', 'PC(20:3(8Z,11Z,14Z)/17:1(9Z))', 'PC(20:4(5Z,8Z,11Z,14Z)/17:0)', 'PC(22:4(7Z,10Z,13Z,16Z)/15:0)', 'PE(18:0/22:4(7Z,10Z,13Z,16Z))', 'PE(18:2(9Z,12Z)/22:2(13Z,16Z))', 'PE(18:3(6Z,9Z,12Z)/22:1(11Z))', 'PE(18:3(9Z,12Z,15Z)/22:1(11Z))', 'PE(18:4(6Z,9Z,12Z,15Z)/22:0)', 'PE(20:0/20:4(5Z,8Z,11Z,14Z))', 'PE(20:1(11Z)/20:3(8Z,11Z,14Z))', 'PE(20:2(11Z,14Z)/20:2(11Z,14Z))', 'PE(20:3(8Z,11Z,14Z)/20:1(11Z))', 'PE(20:4(5Z,8Z,11Z,14Z)/20:0)', 'PE(22:0/18:4(6Z,9Z,12Z,15Z))', 'PE(22:1(11Z)/18:3(6Z,9Z,12Z))', 'PE(22:1(11Z)/18:3(9Z,12Z,15Z))', 'PE(22:2(13Z,16Z)/18:2(9Z,12Z))', 'PE(22:4(7Z,10Z,13Z,16Z)/18:0)'] |
| 854.59165  | 3.88E+03                       | 1.9                      | 0.749                | C47H86NO10P       | [M-H]-     | 854.591661                         | -0.01                         | ['PS(19:1(9Z)/22:2(13Z,16Z))', 'PS(20:3(8Z,11Z,14Z)/21:0)', 'PS(21:0/20:3(8Z,11Z,14Z))', 'PS(22:2(13Z,16Z)/19:1(9Z))']                                                                                                                                                                                                                                                                                                                                                                                                                                                                                                                                                                                                                                                                                                                                                                                                                                                                        |
| 397.33270  | 2.40E+04                       | 1.8                      | 0.791                | C24H46O4          | [M-H]-     | 397.332334                         | 0.92                          | ['Axillarenic acid', 'Tetracosanedioic acid']                                                                                                                                                                                                                                                                                                                                                                                                                                                                                                                                                                                                                                                                                                                                                                                                                                                                                                                                                 |
| 397.33270  | 2.40E+04                       | 1.8                      | 0.791                | C22H42O2          | [M+Hac-H]- | 397.332334                         | 0.92                          | ['(13Z)-Docosenoic acid', '22:1(7Z)', '22:1(9Z)', 'Cetoleic acid', 'trans-brassic acid']                                                                                                                                                                                                                                                                                                                                                                                                                                                                                                                                                                                                                                                                                                                                                                                                                                                                                                      |
| 474.26225  | 2.83E+05                       | 1.6                      | 0.014                | C23H42NO7P        | [M-H]-     | 474.262616                         | -0.77                         | ['LysoPE(18:3(6Z,9Z,12Z)/0:0)', 'LysoPE(18:3(9Z,12Z,15Z)/0:0)']                                                                                                                                                                                                                                                                                                                                                                                                                                                                                                                                                                                                                                                                                                                                                                                                                                                                                                                               |
| 401.35515  | 1.70E+04                       | 1.6                      | 0.791                | C25H50O           | [M+Cl]-    | 401.355567                         | -1.04                         | ['C25 6,7-Epoxy highly branched isoprenoid']                                                                                                                                                                                                                                                                                                                                                                                                                                                                                                                                                                                                                                                                                                                                                                                                                                                                                                                                                  |
| 817.55231  | 1.34E+03                       | 1.6                      | 0.652                | C45H83O8P         | [M+Cl]-    | 817.55196                          | 0.43                          | ['PA(20:1(11Z)/22:2(13Z,16Z))', 'PA(20:2(11Z,14Z)/22:1(11Z))', 'PA(20:3(8Z,11Z,14Z)/22:0)', 'PA(22:0/20:3(8Z,11Z,14Z))', 'PA(22:1(11Z)/20:2(11Z,14Z))', 'PA(22:2(13Z,16Z)/20:1(11Z))']                                                                                                                                                                                                                                                                                                                                                                                                                                                                                                                                                                                                                                                                                                                                                                                                        |
| 956.73399  | 1.64E+03                       | 1.6                      | 0.768                | C52H100NO8P       | [M+Hac-H]- | 956.732511                         | 1.55                          | ['PC(22:0/22:2(13Z,16Z))', 'PC(22:1(11Z)/22:1(11Z))', 'PC(22:1(13E)/22:1(13E))', 'PC(22:1(13Z)/22:1(13Z))', 'PC(22:2(13Z,16Z)/22:0)']                                                                                                                                                                                                                                                                                                                                                                                                                                                                                                                                                                                                                                                                                                                                                                                                                                                         |
| 447.32461  | 1.15E+04                       | 1.6                      | 0.835                | C26H50O3          | [M+K-2H]-  | 447.324602                         | 0.02                          | ['3-oxohexacosanoic acid']                                                                                                                                                                                                                                                                                                                                                                                                                                                                                                                                                                                                                                                                                                                                                                                                                                                                                                                                                                    |
| 447.32461  | 1.15E+04                       | 1.56                     | 0.835                | C29H46O2          | [M+Na-2H]- | 447.324449                         | 0.36                          | ['NA', '1alpha-hydroxy-24-methylvitamin D2 / 1alpha-hydroxy-24-methylergocalciferol', 'zymosterol intermediate 1c']                                                                                                                                                                                                                                                                                                                                                                                                                                                                                                                                                                                                                                                                                                                                                                                                                                                                           |

|           |          |     |       |             |            |            |       |                                                                                                                                                                                                                                                                                                                                                                                                                                                                                    |
|-----------|----------|-----|-------|-------------|------------|------------|-------|------------------------------------------------------------------------------------------------------------------------------------------------------------------------------------------------------------------------------------------------------------------------------------------------------------------------------------------------------------------------------------------------------------------------------------------------------------------------------------|
| 895.59067 | 2.37E+03 | 1.5 | 0.802 | C44H85O12P  | [M+Hac-H]- | 895.591722 | -1.17 | ['PI(O-16:0/19:1(9Z))', 'PI(O-18:0/17:1(9Z))', 'PI(O-20:0/15:1(9Z))', 'PI(P-16:0/19:0)', 'PI(P-18:0/17:0)', 'PI(P-20:0/15:0)']                                                                                                                                                                                                                                                                                                                                                     |
| 800.58035 | 1.34E+04 | 1.5 | 0.641 | C42H80NO7P  | [M+Hac-H]- | 800.581096 | -0.93 | ['PC(O-16:0/18:3(6Z,9Z,12Z))', 'PC(O-16:0/18:3(9Z,12Z,15Z))', 'PC(P-16:0/18:2(9Z,12Z))', 'PE(P-20:0/17:2(9Z,12Z))']                                                                                                                                                                                                                                                                                                                                                                |
| 800.58035 | 1.34E+04 | 1.5 | 0.641 | C44H84NO9P  | [M-H]-     | 800.581096 | -0.93 | ['PS(O-16:0/22:2(13Z,16Z))', 'PS(O-18:0/20:2(11Z,14Z))', 'PS(O-20:0/18:2(9Z,12Z))', 'PS(P-16:0/22:1(11Z))', 'PS(P-18:0/20:1(11Z))', 'PS(P-20:0/18:1(9Z))']                                                                                                                                                                                                                                                                                                                         |
| 437.36363 | 3.29E+04 | 1.5 | 0.801 | C25H46O2    | [M+Hac-H]- | 437.363634 | -0.01 | ['22:2(5Z,9Z)(13Me,17Me,21Me)']                                                                                                                                                                                                                                                                                                                                                                                                                                                    |
| 519.40523 | 3.25E+04 | 1.5 | 0.831 | C30H52O3    | [M+Hac-H]- | 519.405499 | -0.52 | ['(+)-24-Dammarene-3alpha,12beta,20S-triol', 'Myrrhanol A', 'Protopanaxadiol', 'Taraxastane-3beta,16beta,20beta-triol']                                                                                                                                                                                                                                                                                                                                                            |
| 886.65415 | 4.08E+03 | 1.5 | 0.774 | C47H90NO8P  | [M+Hac-H]- | 886.654261 | -0.12 | ['PC(17:0/22:2(13Z,16Z))', 'PC(17:1(9Z)/22:1(11Z))', 'PC(17:2(9Z,12Z)/22:0)', 'PC(18:2(9Z,12Z)/21:0)', 'PC(19:0/20:2(11Z,14Z))', 'PC(19:1(9Z)/20:1(11Z))', 'PC(20:1(11Z)/19:1(9Z))', 'PC(20:2(11Z,14Z)/19:0)', 'PC(21:0/18:2(9Z,12Z))', 'PC(22:0/17:2(9Z,12Z))', 'PC(22:1(11Z)/17:1(9Z))', 'PC(22:2(13Z,16Z)/17:0)', 'PE(20:0/22:2(13Z,16Z))', 'PE(20:1(11Z)/22:1(11Z))', 'PE(20:2(11Z,14Z)/22:0)', 'PE(22:0/20:2(11Z,14Z))', 'PE(22:1(11Z)/20:1(11Z))', 'PE(22:2(13Z,16Z)/20:0)'] |
| 886.65415 | 4.08E+03 | 1.5 | 0.774 | C49H94NO10P | [M-H]-     | 886.654261 | -0.12 | ['PS(21:0/22:1(11Z))', 'PS(22:1(11Z)/21:0)']                                                                                                                                                                                                                                                                                                                                                                                                                                       |
| 458.34851 | 1.32E+05 | 1.5 | 0.720 | C23H45NO4   | [M+Hac-H]- | 458.348713 | -0.44 | ['L-Palmitoylcarnitine']                                                                                                                                                                                                                                                                                                                                                                                                                                                           |
| 441.35845 | 3.79E+04 | 1.5 | 0.720 | C24H46O3    | [M+Hac-H]- | 441.358549 | -0.22 | ['Hydroxynervonic acid']                                                                                                                                                                                                                                                                                                                                                                                                                                                           |

a Average intensity across all samples (n=8 control, n=6 low dose and n=8 high dose Cu exposed samples).

b Fold change in intensity from control to *in vitro* air-exposed group.

c From t-test between control and air-exposed groups with a false discovery rate (FDR) of 5% to correct for multiple hypothesis testing.

d Calculated for the specified ion form of the empirical formula.

e Error between the observed and theoretical masses, presented as parts per million of the theoretical mass.
