# Supplementary material for: Defining the Baseline and Oxidant Perturbed Lipidomic Profiles of Daphnia magna
Source: Metabolites. 2017 Mar 15;7(1):11. doi: 10.3390/metabo7010011 (PMC5372214; doi:10.3390/metabo7010011)
Supplement: Supplementary file 1 [file metabolites-07-00011-s001.zip]

Archive with 7 entries (7 files):
- Table S4.pdf
- Table S5.xlsx
- Table S6.xlsx
- Table S7.pdf
- Table S1.pdf
- Table S2.xlsx
- Table S3.xlsx
