# Supplementary material for: Defining the Baseline and Oxidant Perturbed Lipidomic Profiles of Daphnia magna
Source: Metabolites. 2017 Mar 15;7(1):11. doi: 10.3390/metabo7010011 (PMC5372214; doi:10.3390/metabo7010011)
Supplement: Supplementary file 1 [file metabolites-07-00011-s001.zip › Table S2.xlsx]

## Sheet: Sheet1
Table S2 Putative identification of lipids detected in the mass spectra of D. magna. NA indicates compound is not in the LipidBlast library
Observed		Identification
mz	Average intensitya	Empirical formula	Ion form	Theoretical mass (Da)b	Mass error (ppm)c	Putative ID
84.4061	11500.1	0
178.925	5172.76	0
195.086	5020.98	0
217.001	4237.73	0
217.005	5124.73	0
249.185	6873.31	0
250.144	3991.38	0
250.19	18422.8	0
252.205	7640.43	0
255.222	3225.67	0
255.223	2229.25	0
256.233	7833.23	0
256.241	4878.29	0
262.157	6435.24	0
263.133	14538.9	0
265.218	12423.5	C15H26	[M+Hac-H]-	265.217	1.83	['NA']
265.218	12423.5	C17H30O2	[M-H]-	265.217	1.83	['NA']
267.114	7786.15	0
267.231	2317.82	0
285.244	27601.7	C15H30O	[M+Hac-H]-	285.244	1.34	['NA', 'Pentadecanal']
285.244	27601.7	C17H34O3	[M-H]-	285.244	1.34	['NA', '(R)-2-methoxyhexadecanoic acid', '2-Methoxyhexadecanoic acid', '2-hydroxy-3-methylhexadecanoic acid']
293.213	41446.8	C16H26O	[M+Hac-H]-	293.212	1.33	['NA']
293.213	41446.8	C18H30O3	[M-H]-	293.212	1.33	['NA', '(9R,13R)-10,11-dihydro-12-oxo-15-phytoenoic acid', '(9R,13R)-10-oxo-11-phytoenoic acid', '(9R,13R)-15,16-dihydro-12-oxo-10-phytoenoic acid', '(9S,13S)-10-oxo-11-phytoenoic acid', '(9S,13S)-15,16-dihydro-12-oxo-10-phytoenoic acid', '12,13S-EpODE', '13(S)-HOT', '13-HOTE', '13-OxoODE', '13S-HOTrE(gamma)', '15(16)-EpODE', '17-hydroxy-linolenic acid', '2(R)-HOT', '2-HoTrE', '8-(5-Hexyl-furan-2…
295.192	22602.9	C15H24O2	[M+Hac-H]-	295.191	1.38	['NA', '(-)-Kanshone A', 'Capnell-9(12)-ene-8beta,10alpha-diol', 'Capsidiol', 'Latia luciferin']
295.192	22602.9	C17H28O4	[M-H]-	295.191	1.38	['10-Deoxymethynolide', '3beta-Acetoxy-4-oplopanone']
295.265	73262.3	C17H32	[M+Hac-H]-	295.264	1.27	['NA']
295.265	73262.3	C19H36O2	[M-H]-	295.264	1.27	['NA', '17-Methyl-6Z-octadecenoic acid', '18:1(12E)(11Me)', '18:1(13Z)(17Me)', '18:1(7Z)(17Me)', '19:1(11Z)', '19:1(12Z)', '19:1(13Z)', '19:1(16Z)', '19:1(6Z)', '19:1(9Z)', 'Dihydrosterculic acid', 'Lactobacillic acid', 'Nonadeca-10(Z)-enoic acid']
296.232	40796.9	0
297.048	41183.9	0
301.215	7132.52	0
302.242	48320.7	0
304.237	59593.8	0
305.249	115051	C18H30	[M+Hac-H]-	305.249	1.3	['NA', '5-propylideneisolongifolane']
305.249	115051	C20H34O2	[M-H]-	305.249	1.3	['NA', '(5Z,9E,14Z)-icosa-5,9,14-trienoic acid', '(8Z,11Z,14Z)-Icosatrienoic acid', '20:3(5Z,13Z,16Z)', '5,8,11-Eicosatrienoic acid', 'Icosatrienoic acid', 'Oncobic acid', 'Plaunotol', 'Sciadonic acid', 'eicosa-5Z,8Z,14Z-trienoic acid']
307.228	41425.7	C17H28O	[M+Hac-H]-	307.228	1.31	['5-(2-hydroxyethyl)isolongifol-4-ene', '5-(2-hydroxyethyl)isolongifol-5-ene', 'Heptadecatrienal']
307.228	41425.7	C19H32O3	[M-H]-	307.228	1.31	['NA']
307.265	44843.1	C18H32	[M+Hac-H]-	307.264	1.32	['NA']
307.265	44843.1	C20H36O2	[M-H]-	307.264	1.32	['NA', '20:2(5Z,11Z)', '20:2(5Z,13Z)', '20:2(5Z,15Z)', '20:2(5Z,9Z)', '20:2(6,11)', '20:2(7Z,14Z)', 'Sclareol']
309.244	61354.5	C17H30O	[M+Hac-H]-	309.244	1.17	['NA']
309.28	76502.3	C18H34	[M+Hac-H]-	309.28	1.25	['NA']
309.28	76502.3	C20H38O2	[M-H]-	309.28	1.25	['NA', '20:1(7Z)', '2E-Phytenic acid', '2E-Phytenoic acid', '2Z-Phytenoic Acid', 'Icosenoic acid', 'Prostanoic acid', 'cis-gadoleic acid', 'trans-gondoic acid']
311.26	59971.4	C17H32O	[M+Hac-H]-	311.259	1.29	['NA']
311.26	59971.4	C19H36O3	[M-H]-	311.259	1.29	['NA']
312.299	36747	0
316.255	21462.6	0
319.228	18840.2	C18H28O	[M+Hac-H]-	319.228	1.19	['NA', '4,5-(methanoxyethano)isolongifol-4-ene', '5-(1-oxopropan-2-yl)isolongifol-5-ene']
319.228	18840.2	C20H32O3	[M-H]-	319.228	1.19	['NA', '(+)-Beyerol', '(+-)-Trihydroxy-decipiadiene', '(-)-16alpha,17-Dihydroxy-atisan-3-one', '(15S)-15-Hydroxy-5,8,11-cis-13-trans-eicosatetraenoate', '1(15),8(19)-Trinervitadiene-3alpha,5alpha,18-triol', '11(R)-HETE', '11,12-EET', '11-HETE', '11R,12S-EpETrE', '11S,12R-EpETrE', '11S-HETE', '12(R)-HETE', '12(S)-HETE', '12-HETE', '14,15-EET', '14R,15S-EpETrE', '14S,15R-EpETrE', '15-HETE', '15R-HE…
321.244	53826.1	C18H30O	[M+Hac-H]-	321.244	1.16	['NA', '5-(1-hydroxypropan-2-yl)isolongifol-4-ene', '5-(1-hydroxypropan-2-yl)isolongifol-5-ene', '5-(2-methoxyethyl)isolongifol-5-ene']
321.244	53826.1	C20H34O3	[M-H]-	321.244	1.16	['NA', '(+)-Villanovane-13alpha,19-diol', '(-)-2,7-Dolabelladiene-6beta,10alpha,18-triol', '(-)-Spongiane-15,16-diol', '12R-HETrE', '15(S)-Hydroxyeicosatrienoic acid', '5S-HETrE', '8S-HETrE']
325.239	43472.5	C17H30O2	[M+Hac-H]-	325.238	1.13	['NA']
325.239	43472.5	C19H34O4	[M-H]-	325.238	1.13	['NA', 'Ceriporic acid A']
327.291	20108.2	C18H36O	[M+Hac-H]-	327.29	1.13	['NA', 'Octadecanal', 'Oleyl alcohol (NF)', 'octadec-11Z-enol']
327.291	20108.2	C20H40O3	[M-H]-	327.29	1.13	['NA', '2-hydroxyphytanic acid', 'L-2-Hydroxyphytanate']
335.259	27803.4	C19H32O	[M+Hac-H]-	335.259	0.96	['5-(1-hydroxybutan-2-yl)isolongifol-4-ene', '5-(1-hydroxybutan-2-yl)isolongifol-5-ene', '5-(1-methoxypropan-2-yl)isolongifol-5-ene', '5-(3-hydroxybutan-2-yl)isolongifol-5-ene', '5a-Androstan-3b-ol']
339.254	34609.9	C18H32O2	[M+Hac-H]-	339.254	1.08	['NA', '(R)-laballenic acid', '(S)-laballenic acid', '16:2(2E,4E)(4Me,6Me[S])', '16:2(2E,4E)(5Me,7Me[S])', '7-trans,9-cis-octadecadienoic acid', '9-cis,11-trans-Octadecadienoate', '9E,11E-Octadecadienoic acid', 'Chaulmoogric acid', 'Linoelaidic acid', 'Linoleate', 'Malvalic acid', 'Sebaleic acid', 'Stearolic acid', 'Taxoleic acid']
339.254	34609.9	C20H36O4	[M-H]-	339.254	1.08	['11-deoxy-PGF1a', '11-deoxy-PGF1b', '15S-HpEDE', 'PGE1 alcohol', 'PGF2alpha alcohol']
345.282	84066.1	0
349.275	135281	C20H34O	[M+Hac-H]-	349.275	1.01	['NA', '(+)-Tormesol', '(+)-Verticillol', '(-)-Dilophol', '(Z,Z,Z)-geranylgeraniol', '5-(1-methoxybutan-2-yl)isolongifol-5-ene', 'Aphidicolan-16beta-ol', 'Geranylgeraniol', 'Presphaerol', 'Verrucosan-2b-ol', 'tuberculosinol']
349.275	135281	C22H38O3	[M-H]-	349.275	1.01	['NA']
350.279	26749.9	0
353.306	23742	C20H38O	[M+Hac-H]-	353.306	0.99	['NA', '2E-Phytenal']
353.306	23742	C22H42O3	[M-H]-	353.306	0.99	['NA']
359.221	56391.6	0
360.301	22097.5	0
361.236	31902.4	0
363.252	71801	0
365.343	47731.3	C22H42	[M+Hac-H]-	365.343	0.84	['NA']
365.343	47731.3	C24H46O2	[M-H]-	365.343	0.84	['NA', '(15Z)-Tetracosenoic acid', '4-Methyl-3-heptyl palmitoleate', 'trans-selacholeic acid']
367.286	32510.5	C20H36O2	[M+Hac-H]-	367.285	0.89	['NA', '20:2(5Z,11Z)', '20:2(5Z,13Z)', '20:2(5Z,15Z)', '20:2(5Z,9Z)', '20:2(6,11)', '20:2(7Z,14Z)', 'Sclareol']
368.362	21809.9	0
369.229	37977.6	C18H30O4	[M+Hac-H]-	369.228	0.83	['NA', '12-HpOTrE', '13(S)-HPOT', '13-HpOTrE', '13S-HpOTrE', '13S-HpOTrE(gamma)', '15,16-EpODE', '16-HpOTrE', '7S,8S-DiHOTrE', '9(S)-HPOT', '9-HpOTrE', '9H-12(13)-EpODE']
369.229	37977.6	C20H34O6	[M-H]-	369.228	0.83	['19R-hydroxy-PGE1', '19R-hydroxy-PGF2alpha', '20-hydroxy-PGF2alpha', '6-Keto-prostaglandin F1alpha', 'Thromboxane B2']
371.244	36328.1	C18H32O4	[M+Hac-H]-	371.244	0.85	['NA', '(7S,8S)-DiHODE', '(9Z,11E)-(13S)-13-Hydroperoxyoctadeca-9,11-dienoic acid', '(9Z,12Z)-(11S)-11-Hydroperoxyoctadeca-9,12-dienoic acid', '10-HpODE', '10R-HpODE', '10S-HpODE', '12,13-DiHODE', '12,13-Epoxy-9-hydroxy-10-octadecenoate', '12-HpODE', '14-HpODE', '15,16-DiHODE', '5S,8R-DiHODE', '8(R)-HPODE', '8,13-DiHODE', '8-HpODE', '8R,11S-DiHODE', '9(S)-HPODE', '9,10-DiHODE', '9,10-Epoxy-13-hyd…
371.244	36328.1	C20H36O6	[M-H]-	371.244	0.85	['13,14-dihydro-19R-hydroxyPGE1', '19R-hydroxy-PGF1alpha', '8,8a-Deoxyoleandolide', 'TXB1']
371.281	50298.1	C19H36O3	[M+Hac-H]-	371.28	0.89	['NA']
373.26	59711.2	C18H34O4	[M+Hac-H]-	373.26	0.93	['10-HpOME', '10R-HpOME(11Z)', '10S-HpOME', '11-HpOME', '11-HpOME(9Z)', '11R-HpOME', '12,13-DHOME', '12,13-DiHOME(9)', '12-HpOME(10E)', '12R-HpOME(13E)', '12R-HpOME(13Z)', '12S-HpOME(13E)', '12S-HpOME(13Z)', '13R-HpOME(11E)', '13S-HpOME(11E)', '14R-HpOME(12E)', '14S-HpOME(12E)', '18-hydroxy-9R,10S-epoxy-stearic acid', '18-hydroxy-9S,10R-epoxy-stearic acid', '5S,8R-DiHOME', '6-HpOME(7E)', '7-HpOME…
374.245	37951.3	0
374.299	25956.1	0
374.986	27108.1	0
374.993	24070.9	0
375.312	57806.6	0
380.248	58437.4	0
383.244	151675	C19H32O4	[M+Hac-H]-	383.244	1.09	['NA']
383.317	33013.6	C21H40O2	[M+Hac-H]-	383.317	0.98	['NA', '18:1(5Z)(9Me,13Me,17Me)', '21:1(7Z)']
383.317	33013.6	C23H44O4	[M-H]-	383.317	0.98	['Tricosanedioic acid']
383.353	21732.6	C24H48O3	[M-H]-	383.353	1.02	['NA', 'DL-Cerebronic acid', 'Mycolipanolic acid (C24)']
384.312	21653.4	C20H39NO2	[M+Hac-H]-	384.312	1.14	['N-Oleoylethanolamine']
385.007	34839.1	0
385.26	65538.7	C19H34O4	[M+Hac-H]-	385.26	0.87	['NA', 'Ceriporic acid A']
385.26	65538.7	C21H38O6	[M-H]-	385.26	0.87	['6-Deoxyerythronolide B']
385.296	48811.2	C20H38O3	[M+Hac-H]-	385.296	0.89	['NA', '2-oxophytanic acid', 'Lesquerolic acid']
387.004	60728.9	0
387.231	184881	C21H36O4	[M+Cl]-	387.231	0.95	['Ceriporic acid C']
387.276	145446	0
387.312	30695.2	C20H40O3	[M+Hac-H]-	387.312	0.96	['NA', '2-hydroxyphytanic acid', 'L-2-Hydroxyphytanate']
388.279	27967.4	C22H41NO2	[M+(37Cl)]-	388.28	-3.09	['Anandamide (20:2, n-6)']
388.307	69299.4	C19H39NO3	[M+Hac-H]-	388.307	1.09	['Penaresidin A', 'Penaresidin B']
389.001	32036.4	0
389.228	46634.7	C21H36O4	[M+(37Cl)]-	389.228	0.51	['Ceriporic acid C']
389.247	49251.2	C21H38O4	[M+Cl]-	389.246	1.1	['Ceriporic acid B', 'MG(18:2(9Z,12Z)/0:0/0:0)[rac]', 'PGF2alpha methyl ether']
389.343	31360.9	C26H46O2	[M-H]-	389.343	0.99	['NA', '26:3(5Z,9Z,19E)']
390.295	57238.8	C22H43NO2	[M+(37Cl)]-	390.296	-3.18	['Anandamide (20:l, n-9)']
391.262	43441.4	C21H40O4	[M+Cl]-	391.262	1.09	['Heneicosanedioic acid', 'MG(0:0/18:1(9Z)/0:0)', 'MG(18:1(11E)/0:0/0:0)[rac]', 'MG(18:1(9Z)/0:0/0:0)[rac]']
393.374	60261.5	C24H46	[M+Hac-H]-	393.374	0.8	['NA']
393.374	60261.5	C26H50O2	[M-H]-	393.374	0.8	['NA', '22:1(5Z)(9Me,13Me,17Me,21Me)', '26:1(19Z))', '26:1(5Z))', '4-Methyl-3-heptyl oleate', 'Lauryl myristoleate', 'Myristoleyl laurate', 'Ximenic acid']
395.39	54287.2	C24H48	[M+Hac-H]-	395.389	0.88	['NA']
395.39	54287.2	C26H52O2	[M-H]-	395.389	0.88	['NA', '25:0(18Me)', '25:0(23Me)', '26:0(18Me)', '26:0(18Me,24Me)', '4-Methyl-3-heptyl stearate ', 'Hexacosanoic acid', 'Isocerotic acid', 'Lauryl myristate', 'Mycocerosic acid (C26)', 'Mycosanoic acid (C26)', 'Myristyl laurate']
397.256	17694.5	0
397.26	224483	C20H34O4	[M+Hac-H]-	397.26	1	['NA', '11,12-DHET', '11-deoxy-PGE1', '11-deoxy-PGF2a', '11-deoxy-PGF2beta', '12-Keto-tetrahydro-leukotriene B4', '14,15-DHET', '5,6-DHET', '8,9-DHET', '8R,9S-cis-epoxy-10S-hydroxy-eicosa-11Z,14Z-dienoic acid.']
397.333	47815.2	C22H42O2	[M+Hac-H]-	397.332	0.95	['NA', '(13Z)-Docosenoic acid', '22:1(7Z)', '22:1(9Z)', 'Cetoleic acid', 'trans-brassidic acid']
397.333	47815.2	C24H46O4	[M-H]-	397.332	0.95	['Axillarenic acid', 'Tetracosanedioic acid']
398.263	46639.4	C23H39NO2	[M+(37Cl)]-	398.265	-3.06	['NA', 'N-(1R-methyl-2-hydroxy-ethyl) arachidonoyl amine', 'N-(2-methoxy-ethyl) arachidonoyl amine', 'N-(2-methyl-2S-hydroxy-ethyl) arachidonoyl amine', 'N-(3-hydroxy-propyl) arachidonoyl amine', 'N-methyl N-(2-hydroxy-ethyl) arachidonoyl amine', 'alpha-methyl anandamide']
399.276	88171.7	C20H36O4	[M+Hac-H]-	399.275	0.89	['11-deoxy-PGF1a', '11-deoxy-PGF1b', '15S-HpEDE', 'PGE1 alcohol', 'PGF2alpha alcohol']
401.02	27867.9	0
401.291	93873.8	C20H38O4	[M+Hac-H]-	401.291	0.94	['Eicosanedioic acid', 'PGF1a alcohol']
401.364	44252.9	C22H46O2	[M+Hac-H]-	401.364	0.86	['1,2-docasanediol', '15-methyl-1,2-heneicosanediol']
403.343	32015.6	0
405.351	27457.1	C24H50O2	[M+Cl]-	405.35	0.93	['1,2-tetracosanediol']
406.95	24610	0
409.296	25983.1	C22H38O3	[M+Hac-H]-	409.296	1.35	['NA']
411.276	989953	C21H36O4	[M+Hac-H]-	411.275	0.77	['Ceriporic acid C']
411.385	41196.3	C24H48O	[M+Hac-H]-	411.384	0.78	['NA']
411.385	41196.3	C26H52O3	[M-H]-	411.384	0.78	['NA', '(S)-3-hydroxyhexacosanoic acid', 'Mycolipanolic acid (C26)']
412.279	240774	C24H41NO2	[M+(37Cl)]-	412.28	-3.11	['NA', '7,10,13,16-Docosatetraenoylethanolamine', 'N-(1,1-dimethyl-2-hydroxy-ethyl) arachidonoyl amine', 'N-ethyl N-(2-hydroxy-ethyl) arachidonoyl amine', 'alpha,alpha-dimethyl anandamide']
413.038	19760.8	0
414.295	80485.2	0
415.035	45019.9	0
415.38	69888.6	C23H48O2	[M+Hac-H]-	415.379	0.69	['1,2-tricosanediol']
416.31	75833.6	0
416.339	44166.1	0
417.033	25755.3	0
417.286	52460.3	C20H38O5	[M+Hac-H]-	417.286	0.72	['NA']
417.359	32151.5	0
417.374	86940.5	C28H50O2	[M-H]-	417.374	0.64	['15-ketocholestane', '24:3(5Z,9Z,17Z)(11Me,15Me,19Me,23Me)', '28:3(5Z,9Z,21Z)', '3-epi-6-deoxocathasterone', '6-Deoxocathasterone', '6alpha-hydroxycampestanol']
418.326	37736.8	C24H47NO2	[M+(37Cl)]-	418.327	-3.13	['Erucicoyl-EA']
418.377	16740.7	0
418.968	37087.5	0
419.297	18274.6	C29H40O2	[M-H]-	419.296	3.64	['1alpha-hydroxy-22-(3-methylphenyl)-23,24,25,26,27-pentanorvitamin D3 / 1alpha-hydroxy-22-(3-methylphenyl)-23,24,25,26,27-pentanorcholecalciferol']
420.965	76169.7	0
421.254	21954.5	0
421.26	55804.9	C22H34O4	[M+Hac-H]-	421.26	0.68	['10,11-DiHDPE', '13,14-DiHDPE', '16,16-dimethyl-PGA2', '16,17-DiHDPE', '19,20-DiHDPA', '1a,1b-dihomo-15-deoxy-delta-12,14-PGD2', '1a,1b-dihomo-PGJ2', '7,8-DiHDPE']
421.26	55804.9	C24H38O6	[M-H]-	421.26	0.68	['NA']
421.405	62874.1	C26H50	[M+Hac-H]-	421.405	0.56	['NA']
421.405	62874.1	C28H54O2	[M-H]-	421.405	0.56	['NA', '24:1(5Z)(11Me,15Me,19Me,23Me)', 'Lauryl palmitoleate', 'Mycolipenic acid (C28)', 'Myristoleyl myristate', 'Palmitoleyl laurate']
422.936	51406.2	0
422.962	62305.8	0
423.275	53293.3	C22H36O4	[M+Hac-H]-	423.275	0.35	['11-deoxy-16,16-dimethyl-PGE2', '16,16-dimethyl-PGA1']
423.275	53293.3	C24H40O6	[M-H]-	423.275	0.35	['NA', '3a,6b,7a,12a-Tetrahydroxy-5b-cholanoic acid', '3a,6b,7b,12a-Tetrahydroxy-5b-cholanoic acid', '3a,6b,7b,12b-Tetrahydroxy-5b-cholanoic acid', '3alpha,7alpha,12alpha,23R-tetrahydroxy-5beta-cholan-24-oic acid', 'alpha-Phocaecholic acid']
423.348	24898.9	C24H44O2	[M+Hac-H]-	423.348	0.63	['NA', '24:2(5Z,9Z)']
423.421	42881.5	C26H52	[M+Hac-H]-	423.421	0.65	['NA']
423.421	42881.5	C28H56O2	[M-H]-	423.421	0.65	['NA', 'Isomontanic acid', 'Lauryl palmitate', 'Mycocerosic acid (C28)', 'Myristyl myristate', 'Octacosanoic acid', 'Palmityl laurate']
424.933	48597	0
424.959	22871.4	0
425.291	36234.3	0
425.328	8393.62	0
426.93	21233	0
427.054	80848.1	0
427.375	14518.1	0
429.359	60256.1	C23H46O3	[M+Hac-H]-	429.359	0.54	['NA']
429.374	88210.4	C27H46	[M+Hac-H]-	429.374	0.29	['5-Cholestene']
429.374	88210.4	C29H50O2	[M-H]-	429.374	0.29	['NA', '22S-hydroxysitosterol', '4beta-(hydroxymethyl)-4alpha-methyl-5alpha-cholest-7-en-3beta-ol', 'alpha-Tocopherol', 'toxisterol3 B1/ (5E)-(10R)-10-ethoxy-10,19-dihydrovitamin D3 / (5E)-(10R)-10-ethoxy-10,19-dihydrocholecalciferol', 'toxisterol3 B2 / (5E)-(10S)-10-ethoxy-10,19-dihydrovitamin D3 / (5E)-(10S)-10-ethoxy-10,19-dihydrocholecalciferol', 'toxisterol3 B3 / (10R)-10-ethoxy-10,19-dihydr…
429.395	351083	C24H50O2	[M+Hac-H]-	429.395	0.55	['1,2-tetracosanediol']
430.354	21106.7	0
430.399	96921	0
431.374	149070	0
432.333	25044	0
432.378	39964.9	0
432.984	44973.4	0
433.045	24240.5	0
433.382	47370	0
434.372	48437.9	0
434.955	38651	0
434.981	109500	0
435.275	244914	C23H36O4	[M+Hac-H]-	435.275	-0.49	['MG(0:0/20:5(5Z,8Z,11Z,14Z,17Z)/0:0)']
435.275	244914	C25H40O6	[M-H]-	435.275	-0.49	['(-)-Salvisyriacolide']
436.283	116606	C21H44NO6P	[M-H]-	436.283	0.04	['PE(P-16:0e/0:0)']
436.952	86957.2	0
436.978	73578.4	0
437.291	280885	C23H38O4	[M+Hac-H]-	437.291	0.59	['NA', '2-Arachidonoylglycerol', 'Meteneprost (USAN/INN)', 'Norchenodeoxycholic acid']
437.291	280885	C25H42O6	[M-H]-	437.291	0.59	['3beta-(3-methyl-butanoyloxy)-villanovane-13alpha,17-diol']
437.364	33256.2	C25H46O2	[M+Hac-H]-	437.364	0.27	['NA', '22:2(5Z,9Z)(13Me,17Me,21Me)']
437.4	41196.4	0
438.295	73746.6	0
438.949	88610.3	0
438.975	31020.1	0
439.27	29652.7	C22H36O5	[M+Hac-H]-	439.27	0.57	['16,16-dimethyl-PGD2', '16,16-dimethyl-PGE2', '1a,1b-dihomo-PGD2', '1a,1b-dihomo-PGE2', '20-ethyl-PGE2', 'Bisnorcholic acid', 'Dihomo-PGI2']
439.28	10110	C26H42O3	[M+(37Cl)]-	439.28	-0.33	['NA', '1alpha,25-dihydroxy-19-norprevitamin D3 / 1alpha,25-dihydroxy-19-norprecholecalciferol', '1alpha,25-dihydroxy-21-norvitamin D3 / 1alpha,25-dihydroxy-21-norcholecalciferol', '1alpha,25-dihydroxy-24-norvitamin D3 / 1alpha,25-dihydroxy-24-norcholecalciferol', '1alpha-hydroxy-22-oxavitamin D3 / 1alpha-hydroxy-22-oxacholecalciferol', '22-ethyl-1alpha,22-dihydroxy-25,26,27-trinorvitamin D3 / 22…
440.946	51300.1	0
441.07	31679.3	0
441.224	62171.2	C24H36O5	[M+(37Cl)]-	441.223	1.78	['NA', '7alpha,12alpha-Dihydroxy-3-oxochol-4-enoate']
441.334	10213.2	C27H48O2	[M+(37Cl)]-	441.332	3.96	['NA', '15alpha-hydroxycholestane ', '15beta-hydroxycholestane', '24:3(5Z,9Z,17Z)(15Me,19Me,23Me)', '27:3(5Z,9Z,20Z)', '3alpha,7alpha-Dihydroxy-5beta-cholestane', '5alpha-hydroxycholesterol', '6alpha-hydroxycholestanol']
442.289	63074.6	0
443.239	40854.3	C24H38O5	[M+(37Cl)]-	443.238	2.42	['NA', '3-Oxocholic acid', '7-Ketodeoxycholic acid']
443.248	106899	0
443.338	93451.9	C23H44O4	[M+Hac-H]-	443.338	1.05	['Tricosanedioic acid']
443.374	51439.4	C24H48O3	[M+Hac-H]-	443.374	0.23	['NA', 'DL-Cerebronic acid', 'Mycolipanolic acid (C24)']
443.411	110944	0
444.342	16001.2	0
444.414	25466.5	0
445.064	40481.7	0
445.255	65793	C24H40O5	[M+(37Cl)]-	445.254	1.87	['NA', '3a,7b,12a-Trihydroxy-5a-Cholanoic acid', '3a,7b,12b-Trihydroxy-5b-cholanoic acid', '3b,7b,12a-Trihydroxy-5a-Cholanoic acid', '3b,7b,12a-Trihydroxy-5b-cholanoic acid', 'Alloavicholic acid', 'Allocholic acid', 'Avicholate', 'Bitocholate', 'Cholic acid', 'Cygnocholic acid', 'Haemulcholate', 'Hyocholate', 'Ursocholate', 'Vulpecholate', 'alpha-Muricholate', 'beta-Muricholate', 'beta-Phocaechol…
445.369	79712.6	C27H46O	[M+Hac-H]-	445.369	-0.38	['NA', '15-dehydro-A-norcholestanol', '3beta-Hydroxycholest-4-ene', '5alpha-Cholest-8-en-3beta-ol', '5alpha-Cholestan-3-one', '5beta-Cholestan-3-one', 'Cholesterol', 'Lathosterol', 'Patinosterol', 'dihydrotachysterol3 / (5E)-(10S)-10,19-dihydrovitamin D3 / (5E)-(10S)-10,19-dihydrocholecalciferol', 'toxisterol3 R1 / 6,19-dihydrovitamin D3 / 6,19-dihydrocholecalciferol']
445.369	79712.6	C29H50O3	[M-H]-	445.369	-0.38	['NA', '24-hydroperoxy-24-vinylcholesterol', 'Nebrosteroid M']
445.39	72434.3	0
445.405	132489	C30H54O2	[M-H]-	445.405	0.15	['30:3(5Z,9Z,23Z)', 'Lauryl linolenate', 'Linolenyl laurate']
446.321	30199	0
446.409	39772	0
446.999	101387	0
447.194	119841	0
447.315	122492	0
447.361	33452.2	C26H52O3	[M+Cl]-	447.361	0.52	['NA', '(S)-3-hydroxyhexacosanoic acid', 'Mycolipanolic acid (C26)']
447.385	46843.6	C27H48O	[M+Hac-H]-	447.384	0.32	['NA', '5alpha-Cholestanol', '5beta-Coprostanol', 'Epi-coprostanol', 'Epidihydrocholesterin']
447.421	42372.9	C30H56O2	[M-H]-	447.421	0.28	['26:2(5Z,9Z)(13Me,17Me,21Me,25Me)', '29:2(5Z,9Z)(22Me)', '29:2(5Z,9Z)(26Me)', '30:2(9Z,23Z)', 'Lauryl linoleate', 'Linoleyl laurate', 'Myristolel palmitoleate', 'Palmitoleyl myristoleate']
448.274	159109	C20H39NO4S	[M+Hac-H]-	448.274	-0.01	['N-oleoyl taurine']
448.319	27955.4	0
448.328	49865	0
448.373	30122	C26H53NO2	[M+(37Cl)]-	448.374	-3.44	['Lignoceroyl-EA']
448.996	351453	0
449.25	22174.7	0
449.331	121665	0
449.34	53243.1	0
449.377	129101	0
449.437	99931.7	C30H58O2	[M-H]-	449.436	0.3	['26:1(5Z)(13Me,17Me,21Me,25Me)', '30:1(23Z))', 'Lauryl oleate', 'Lumepueic acid', 'Myristoleyl palmitate', 'Myristyl palmitoleate', 'Oleyl laurate', 'Palmitoleyl myristate', 'Palmityl myristoleate']
450.263	116632	C21H42NO7P	[M-H]-	450.263	0.72	['LysoPE(16:1(9Z)/0:0)', 'PC(O-11:1(10E)/2:0)']
450.263	116632	C23H43NO3S	[M+(37Cl)]-	450.263	0.27	['N-oleoyl methionine']
450.334	24380.7	0
450.38	22604.5	0
450.44	26280.7	0
450.993	163099	0
451.379	43658.8	C26H48O2	[M+Hac-H]-	451.379	-0.19	['NA', '25:2(5Z,9Z)(23Me)', '25:2(5Z,9Z)(24Me)', '26:2(9Z,19Z)', '4-Methyl-3-heptyl linoleate ']
451.379	43658.8	C28H52O4	[M-H]-	451.379	-0.19	['NA']
451.997	16789.5	0
452.278	115325	C19H40NO5P	[M+Hac-H]-	452.278	0.25	['C19 Sphingosine-1-phosphate']
452.278	115325	C21H44NO7P	[M-H]-	452.278	0.25	['LysoPE(16:0/0:0)', 'PC(13:0/0:0)']
452.99	67784.5	C17H14N2O7S3	[M-H]-	452.989	2.95	['4-Acetamido-4-isothiocyanostilbene-2,2-disulphonic acid']
453.286	108178	C23H38O5	[M+Hac-H]-	453.286	0.07	['12-HETE-G', '15-HETE-G']
453.3	44843.8	C27H38O2	[M+Hac-H]-	453.301	-1.27	['25-hydroxy-16,17,23,23,24,24-hexadehydrovitamin D3 / 25-hydroxy-16,17,23,23,24,24-hexadehydrocholecalciferol']
453.3	44843.8	C29H42O4	[M-H]-	453.301	-1.27	['24a,24b-epoxy-23-tetradehydro-24a,24b-dihomo-1alpha,25-dihydroxyvitamin D3 / 24a,24b-epoxy-23-tetradehydro-24a,24b-dihomo-1alpha,25-dihydroxycholecalciferol', 'Ubiquinone Q4']
454.926	57001.7	0
455.302	96097.3	C23H40O5	[M+Hac-H]-	455.301	0.49	['NA', '10-F2-dihomo-IsoP', 'PGF2alpha isopropyl ester']
455.411	437705	C26H52O2	[M+Hac-H]-	455.411	0.37	['NA', '25:0(18Me)', '25:0(23Me)', '26:0(18Me)', '26:0(18Me,24Me)', '4-Methyl-3-heptyl stearate ', 'Hexacosanoic acid', 'Isocerotic acid', 'Lauryl myristate', 'Mycocerosic acid (C26)', 'Mycosanoic acid (C26)', 'Myristyl laurate']
456.305	15512.9	0
456.414	122661	0
456.897	25693.6	0
456.923	53462.7	0
456.995	76900.8	0
457.082	39516.5	0
457.232	275806	C21H41O6P	[M+(37Cl)]-	457.231	3.52	['CPA(18:0)']
457.296	57235	C26H38O3	[M+Hac-H]-	457.296	0.13	['(22E,24E)-1alpha,26-dihydroxy-22,23,24,25-tetradehydro-27-norvitamin D3 / (22E,24E)-1alpha,26-dihydroxy-22,23,24,25-tetradehydro-27-norcholecalciferol', '25,26-epoxy-1alpha-hydroxy-23,23,24,24-tetradehydro-19-norvitamin D3 / 25,26-epoxy-1alpha-hydroxy-23,23,24,24-tetradehydro-19-norcholecalciferol', 'Ximaosteroid C']
457.317	67969.5	0
457.39	106645	C25H50O3	[M+Hac-H]-	457.39	0.18	['NA']
457.426	483616	0
458.393	24961.5	0
458.43	141441	0
459.352	38843.5	0
459.369	55027.4	0
459.406	327566	0
460.364	35818.9	0
460.409	90261.5	0
461.348	4.21263e+06	C25H50O7	[M-H]-	461.348	-0.21	['NA']
461.367	66876.7	0
461.4	610978	C28H50O	[M+Hac-H]-	461.4	0.09	['NA', 'Campestanol', 'Ergostanol']
462.018	26495.6	0
462.352	1.06337e+06	0
463.012	1.04613e+06	0
463.266	51335.2	0
463.322	24579.3	C23H46N4O3	[M+(37Cl)]-	463.323	-3.01	['N-stearoyl arginine']
463.322	24579.3	C31H44O3	[M-H]-	463.322	0.61	['1alpha-hydroxy-22-[3-(1-hydroxy-1-methylethyl)phenyl]-23,24,25,26,27-pentanorvitamin D3 / 1alpha-hydroxy-22-[3-(1-hydroxy-1-methylethyl)phenyl]-23,24,25,26,27-pentanorcholecalciferol']
463.328	1.09894e+06	0
463.343	33068.2	C26H44O3	[M+Hac-H]-	463.343	0.02	['1,25-dihydroxy-2-nor-1,2-secovitamin D3 / 1,25-dihydroxy-2-nor-1,2-secocholecalciferol', '1alpha,25-dihydroxy-19-norvitamin D3 / 1alpha,25-dihydroxy-19-norcholecalciferol', '2-Nor-1,3-seco-1alpha,25-dihydroxyvitamin D3']
463.343	33068.2	C28H48O5	[M-H]-	463.343	0.02	['NA', '7-oxotyphasterol', 'Castasterone', 'Hongguanggenin', 'Trihydroxycoprostanoic acid']
463.356	100132	0
463.38	29146.3	C27H48O2	[M+Hac-H]-	463.379	1.65	['NA', '15alpha-hydroxycholestane ', '15beta-hydroxycholestane', '24:3(5Z,9Z,17Z)(15Me,19Me,23Me)', '27:3(5Z,9Z,20Z)', '3alpha,7alpha-Dihydroxy-5beta-cholestane', '5alpha-hydroxycholesterol', '6alpha-hydroxycholestanol']
464.016	141556	0
464.277	144440	C22H44NO7P	[M-H]-	464.278	-3.63	['LysoPC(14:1(9Z))', 'PE(17:1(9Z)/0:0)']
464.302	41751	C24H39NO4	[M+Hac-H]-	464.302	-0.5	['12-HETE-GABA', '15-HETE-GABA']
464.302	41751	C26H43NO6	[M-H]-	464.302	-0.5	['3a,7b,12a-Trihydroxyoxocholanyl-Glycine', 'Glycocholate']
464.981	44256.7	0
465.009	274245	0
465.286	61144.9	C24H38O5	[M+Hac-H]-	465.286	0.11	['NA', '3-Oxocholic acid', '7-Ketodeoxycholic acid']
465.326	94447.9	0
465.431	61215.6	0
466.012	41290.6	0
466.32	151065	0
466.33	45920.3	C23H50NO6P	[M-H]-	466.33	0	['PC(O-14:0/O-1:0)', 'PC(O-15:0/0:0)', 'PE(O-18:0/0:0)']
467.174	119934	0
467.24	34800.4	C19H37O7P	[M+Hac-H]-	467.242	-3.97	['PA(16:1(9Z)/0:0)']
467.24	34800.4	C21H41O9P	[M-H]-	467.242	-3.97	['PG(15:1(9Z)/0:0)']
467.24	34800.4	C26H38O5	[M+(37Cl)]-	467.238	2.81	['17-phenyl-trinor-PGF2alpha isopropyl ester']
467.302	44524	C24H40O5	[M+Hac-H]-	467.301	0.52	['NA', '3a,7b,12a-Trihydroxy-5a-Cholanoic acid', '3a,7b,12b-Trihydroxy-5b-cholanoic acid', '3b,7b,12a-Trihydroxy-5a-Cholanoic acid', '3b,7b,12a-Trihydroxy-5b-cholanoic acid', 'Alloavicholic acid', 'Allocholic acid', 'Avicholate', 'Bitocholate', 'Cholic acid', 'Cygnocholic acid', 'Haemulcholate', 'Hyocholate', 'Ursocholate', 'Vulpecholate', 'alpha-Muricholate', 'beta-Muricholate', 'beta-Phocaechol…
467.316	688932	C28H40O2	[M+Hac-H]-	467.317	-0.99	['NA']
467.316	688932	C30H44O4	[M-H]-	467.317	-0.99	['1alpha,25-dihydroxy-11-(3-hydroxy-1-propynyl)-9,11-didehydrovitamin D3 / 1alpha,25-dihydroxy-11-(3-hydroxy-1-propynyl)-9,11-didehydrocholecalciferol', '3-Oxoglycyrrhetinate']
467.338	48411	C27H48O6	[M-H]-	467.338	0.12	['NA', '5alpha-Dermophol', '5beta-Dermophol', 'Arapaimol-B', 'Herbasterol', 'Scymnol']
467.411	37470.8	C27H52O2	[M+Hac-H]-	467.411	0.06	['NA', '(+)-C27-Phthienoic acid', '26:0(19Cp)', 'Mycolipenic acid (C27)']
468.32	164351	0
468.387	34671.8	0
468.942	43491.4	0
469.029	896794	0
469.171	78244.9	0
469.285	55260.2	0
469.317	29423.6	0
469.354	43388.6	0
469.39	32796.3	C26H50O3	[M+Hac-H]-	469.39	0.26	['3-oxohexacosanoic acid']
470.033	113218	0
470.317	31815.6	0
470.913	52983.4	0
470.939	28496.4	0
471.12	29732.7	C25H24O7	[M+Cl]-	471.122	-3.22	['Artobilichromene', 'Artonin E', 'Artonin J', 'Broussonol A', 'Broussonol B', 'Euchretin B', 'Lupinisoflavone K', 'Lupinisoflavone L', 'Macrophyllol A (flavone)', 'Petalopurpurenol']
471.245	37389.3	0
471.314	148369	0
471.333	25744.6	0
471.406	179123	C26H52O3	[M+Hac-H]-	471.405	0.17	['NA', '(S)-3-hydroxyhexacosanoic acid', 'Mycolipanolic acid (C26)']
472.23	355397	0
472.317	31615.3	0
472.409	47698.5	0
472.91	54006	0
472.929	39762.2	0
473.211	49417.8	C27H34O5	[M+Cl]-	473.21	2.33	['7-O-Methyllicoricidin']
473.224	451186	C21H41O7P	[M+(37Cl)]-	473.225	-3.56	['LPA(0:0/18:1(9Z))', 'LPA(18:1(9Z)/0:0)']
473.283	233525	C29H42O3	[M+Cl]-	473.283	-0.42	['(17Z)-1alpha,25-dihydroxy-26,27-dimethyl-17,20,22,22,23,23-hexadehydrovitamin D3 / (17Z)-1alpha,25-dihydroxy-26,27-dimethyl-17,20,22,22,23,23-hexadehydrocholecalciferol', '1alpha,25-dihydroxy-26,27-dimethyl-20,21,22,22,23,23-hexadehydrovitamin D3 / 1alpha,25-dihydroxy-26,27-dimethyl-20,21,22,22,23,23-hexadehydrocholecalciferol']
473.394	25710.2	C29H56O2	[M+(37Cl)]-	473.394	-1.1	['Mycolipenic acid (C29)', 'Tridecyl palmitoleate']
473.4	1.00571e+06	C29H50O	[M+Hac-H]-	473.4	0.02	['NA', '23,24-dihydro-5alpha-calystanol', '23-methylene-24-methylcholestanol', '28-Isofucostanol', '4,4-dimethyl-5alpha-cholest-7-en-3beta-ol', 'Aplysterol', 'Clionasterol', 'Echissaposterol', 'Fucostanol', 'Petrostanol', 'Schottenol', 'Sitosterol']
473.421	516513	0
473.436	163605	C30H54	[M+Hac-H]-	473.436	-0.11	['Tetrahydrosqualene', 'lanostane']
473.436	163605	C32H58O2	[M-H]-	473.436	-0.11	['Linolenyl myristate', 'Myristoleyl linoleate', 'Myristyl linolenate']
474.227	101656	0
474.263	1.13619e+06	C23H42NO7P	[M-H]-	474.263	0.05	['LysoPE(18:3(6Z,9Z,12Z)/0:0)', 'LysoPE(18:3(9Z,12Z,15Z)/0:0)']
474.286	71099.7	0
474.403	316699	0
474.424	137961	0
474.44	53006	0
474.925	42002.2	0
475.266	269101	C25H42O6	[M+(37Cl)]-	475.265	2.75	['3beta-(3-methyl-butanoyloxy)-villanovane-13alpha,17-diol']
475.346	181577	0
475.407	46999.4	0
475.452	43314.5	C32H60O2	[M-H]-	475.452	0.16	['Linoleyl myristate', 'Myristoleyl oleate', 'Myristyl linoleate', 'Oleyl myristoleate', 'Palmitoleyl palmitoleate']
476.272	27009.6	C21H46NO6P	[M+(37Cl)]-	476.273	-2.29	['PC(O-12:0/O-1:0)', 'PE(O-16:0/0:0)']
476.278	640996	C23H44NO7P	[M-H]-	476.278	0.16	['LysoPE(18:2(9Z,12Z)/0:0)']
476.35	51562.4	0
477.236	20976.8	0
477.247	17659.1	0
477.282	159529	0
477.326	38653.3	0
477.362	135151	0
477.468	103612	C32H62O2	[M-H]-	477.468	0.1	['NA', 'Myristoleyl stearate', 'Myristyl oleate', 'Oleyl myristate', 'Palmitoleyl palmitate', 'Palmityl palmitoleate', 'Stearyl myristoleate']
478.294	643564	C23H46NO7P	[M-H]-	478.294	0.07	['LysoPE(18:1(9Z)/0:0)', 'PC(15:1(9Z)/0:0)']
478.365	35967.2	0
478.471	30853.5	0
479.297	152369	0
479.314	44002	C24H49O7P	[M-H]-	479.314	-0.39	['PA(21:0/0:0)']
479.483	53074.8	C30H60	[M+Hac-H]-	479.483	-0.03	['NA', 'C30 Monocyclic highly branched isoprenoid']
479.483	53074.8	C32H64O2	[M-H]-	479.483	-0.03	['NA', '1-Hexadecyl hexadecanoate', 'Arachidyl laurate', 'Lacceroic acid', 'Lauryl arachidate', 'Mycocerosic acid (C32)', 'Myristyl stearate', 'Stearyl myristate']
480.309	94964.4	C23H48NO7P	[M-H]-	480.31	-0.16	['LysoPC(15:0)', 'LysoPE(18:0/0:0)', 'PC(14:0/O-1:0)', 'PC(7:0/O-8:0)']
481.21	32371.8	C22H30O8	[M+Hac-H]-	481.208	3.44	['Valtratum']
481.332	64248.8	0
484.251	33042.4	0
486.344	45420.4	0
487.293	18664.1	C23H40O7	[M+Hac-H]-	487.291	3.25	['1(3)-glyceryl-PGF2alpha', '2-glyceryl-PGF2alpha']
487.383	19614.8	0
487.416	11808.9	C30H52O	[M+Hac-H]-	487.416	-0.26	['NA', '24,25-Dihydrolanosterol', '24-Isopropyl-cholesterol', '24-ethyl-24-methyl-cholesterol', 'A-norgorgostanol', 'Dinosterol', 'Diplopterol', 'Peridinosterol', 'Tetrahymanol', 'cycloartanol']
487.437	34050.8	0
489.261	190283	C29H40O4	[M+(37Cl)]-	489.259	2.96	['Norselic acid A']
489.38	20571.3	0
489.431	130129	C30H54O	[M+Hac-H]-	489.431	-0.24	['NA']
490.264	50675.9	C27H41NO5S	[M-H]-	490.263	1.02	['Epothilone D']
490.434	47753.9	0
491.276	90610.8	C29H42O4	[M+(37Cl)]-	491.275	2.81	['24a,24b-epoxy-23-tetradehydro-24a,24b-dihomo-1alpha,25-dihydroxyvitamin D3 / 24a,24b-epoxy-23-tetradehydro-24a,24b-dihomo-1alpha,25-dihydroxycholecalciferol', 'Ubiquinone Q4']
491.359	287149	0
491.411	26159.9	C29H52O2	[M+Hac-H]-	491.411	-0.07	['29:3(5Z,9Z,23Z)']
492.279	23628.3	0
492.346	25907.6	C25H52NO6P	[M-H]-	492.346	-0.33	['PC(P-17:0/0:0)', 'PE(P-20:0/0:0)']
492.362	80695.1	C30H51NO2	[M+Cl]-	492.361	1.77	['3-O-Aminopropyl-25-hydroxyvitamin D3']
493.261	35004.3	C30H38O6	[M-H]-	493.26	3.76	['NA']
493.463	41336.7	0
494.976	37522.9	0
495.205	51341.6	0
495.225	79598.8	C26H38N2O3S	[M+(37Cl)]-	495.227	-3.43	['N-(4-benzenesulfonamide) arachidonoyl amine']
495.309	27260	C24H49O8P	[M-H]-	495.309	-0.55	['PG(P-18:0/0:0)']
495.333	24667.5	0
495.369	12872.9	C27H48O4	[M+Hac-H]-	495.369	-0.15	['NA', '(25R)-5beta-cholestane-3alpha,7alpha,12alpha,26-tetrol', '(25S)-5beta-cholestane-3alpha,7alpha,12alpha,26-tetrol', '3alpha,7alpha,12alpha,26-Tetrahydroxy-5beta-cholestane', 'Myxinol']
495.442	18271.3	C29H56O2	[M+Hac-H]-	495.442	-0.19	['Mycolipenic acid (C29)', 'Tridecyl palmitoleate']
496.228	12999.9	0
496.973	102992	0
497.202	28533.9	C24H34O11	[M-H]-	497.203	-1.69	['8-Epiiridodial glucoside tetraacetate', 'Iridodial glucoside tetraacetate']
497.25	11101.5	C27H40O6	[M+(37Cl)]-	497.249	2.29	['Hydrocortisone caproate']
497.385	24715.3	0
497.976	17397.7	0
498.246	47515.1	0
498.262	43872.4	C25H42NO7P	[M-H]-	498.263	-0.41	['LysoPE(20:5(5Z,8Z,11Z,14Z,17Z)/0:0)']
499.345	59794.7	C29H44O3	[M+Hac-H]-	499.343	3.45	['NA', '(20S)-20-cyclopropyl-1alpha,25-dihydroxy-16,17-didehydro-21-norvitamin D3 / (20S)-20-cyclopropyl-1alpha,25-dihydroxy-16,17-didehydro-21-norcholecalciferol', '(22E,24E)-1alpha,25-dihydroxy-22,23,24,24a-tetradehydro-24a,24b-dihomovitamin D3 / (22E,24E)-1alpha,25-dihydroxy-22,23,24,24a-tetradehydro-24a,24b-dihomocholecalciferol', '11alpha-ethynyl-1alpha,25-dihydroxyvitamin D3 / 11alpha-ethyn…
499.364	26232.5	0
499.4	21673.4	0
499.437	30002.1	C28H56O3	[M+Hac-H]-	499.437	-0.2	['NA', 'Mycolipanolic acid (C28)']
499.973	17233.1	0
500.278	24793.8	C25H44NO7P	[M-H]-	500.278	-0.13	['LysoPE(20:4(5Z,8Z,11Z,14Z)/0:0)']
500.278	24793.8	C26H43NO6	[M+Cl]-	500.278	-0.48	['3a,7b,12a-Trihydroxyoxocholanyl-Glycine', 'Glycocholate']
500.967	65133.6	0
501.242	227069	C29H38O5	[M+Cl]-	501.241	1.6	['Minabeolide-2']
501.416	33111.9	0
501.452	42663	0
501.468	24785.4	C34H62O2	[M-H]-	501.468	-0.29	['Linolenyl palmitate', 'Linoleyl palmitatoleate', 'Palmitoleyl linoleate', 'Palmityl linolenate']
502.246	55879.2	0
502.254	37272.6	0
502.294	45051.3	C25H46NO7P	[M-H]-	502.294	-0.31	['LysoPE(20:3(8Z,11Z,14Z)/0:0)']
502.964	19359.7	0
503.237	61223.3	C29H38O5	[M+(37Cl)]-	503.238	-2.06	['Minabeolide-2']
503.251	172418	C26H43O5P	[M+(37Cl)]-	503.251	-1.16	['1alpha-hydroxy-24-(dimethoxyphosphoryl)-25,26,27-trinorvitamin D3 / 1alpha-hydroxy-24-(dimethoxyphosphoryl)-25,26,27-trinorcholecalciferol']
503.378	19530.7	0
503.395	51926.9	0
503.432	38482.4	0
503.447	25351.8	0
504.309	16632.5	C25H48NO7P	[M-H]-	504.31	-0.37	['LysoPE(20:2(11Z,14Z)/0:0)', 'PC(17:2(9Z,12Z)/0:0)']
504.417	68445.5	0
505.248	110876	0
505.374	46121.2	0
505.426	22910.1	C30H54O2	[M+Hac-H]-	505.426	0.39	['30:3(5Z,9Z,23Z)', 'Lauryl linolenate', 'Linolenyl laurate']
505.499	13529.2	C34H66O2	[M-H]-	505.499	-0.32	['NA', 'Arachidyl myristoleate', 'Elaidyl palmitate', 'Myristoleyl arachidate', 'Oleyl palmitate', 'Palmitoleyl stearate', 'Palmityl elaidate', 'Palmityl oleate', 'Stearyl palmitoleate']
506.251	23364.3	C23H42NO9P	[M-H]-	506.252	-2.38	['PS(17:2(9Z,12Z)/0:0)']
507.271	73770.2	C24H45O9P	[M-H]-	507.273	-3.56	['PG(18:2(9Z,12Z)/0:0)']
507.271	73770.2	C29H42O5	[M+(37Cl)]-	507.27	2.69	['Minabeolide-8']
507.442	33419.4	C30H56O2	[M+Hac-H]-	507.442	-0.32	['26:2(5Z,9Z)(13Me,17Me,21Me,25Me)', '29:2(5Z,9Z)(22Me)', '29:2(5Z,9Z)(26Me)', '30:2(9Z,23Z)', 'Lauryl linoleate', 'Linoleyl laurate', 'Myristolel palmitoleate', 'Palmitoleyl myristoleate']
508.473	34423.3	C32H63NO3	[M-H]-	508.474	-0.31	['N-(Tetradecanoyl)-sphing-4-enine']
509.325	65178	C23H47O6P	[M+Hac-H]-	509.325	-0.4	['PA(P-20:0/0:0)']
509.384	22026.4	C28H50O4	[M+Hac-H]-	509.385	-0.71	['NA', '6-Deoxocastasterone']
509.457	100156	C30H58O2	[M+Hac-H]-	509.458	-0.44	['26:1(5Z)(13Me,17Me,21Me,25Me)', '30:1(23Z))', 'Lauryl oleate', 'Lumepueic acid', 'Myristoleyl palmitate', 'Myristyl palmitoleate', 'Oleyl laurate', 'Palmitoleyl myristate', 'Palmityl myristoleate']
510.328	13387.7	0
510.461	32276.4	0
510.988	38586	0
511.266	27842.6	0
511.288	12829.6	0
511.4	13946.4	C28H52O4	[M+Hac-H]-	511.4	-0.14	['NA']
511.462	14880.7	0
511.473	1.62593e+06	C30H60O2	[M+Hac-H]-	511.473	-0.52	['NA', 'Lauryl stearate', 'Melissic acid', 'Mycocerosic acid (C30)', 'Myristyl palmitate', 'Palmityl myristate', 'Stearyl laurate']
511.481	15259.9	0
512.476	542633	0
512.985	38163.9	0
513.416	15778.7	0
513.452	25934.6	0
513.48	80554.5	0
514.375	146049	0
514.982	16355.8	0
515.258	56579.9	0
515.32	39999.8	0
515.378	40205.9	0
515.414	196650	0
515.431	18463.6	0
515.468	21563.7	0
516.417	62427.9	C30H59NO3	[M+Cl]-	516.419	-3.11	['Ceramide (d18:1/12:0)']
516.918	26853	0
517.253	133027	C23H45O8P	[M+(37Cl)]-	517.252	2.55	['PA(10:0/10:0)']
517.253	133027	C30H42O3S	[M+Cl]-	517.255	-3.65	['VD 2656', 'VD 2716']
517.411	77345.6	0
518.257	38267.4	0
518.414	22791.5	C30H59NO3	[M+(37Cl)]-	518.416	-3.52	['Ceramide (d18:1/12:0)']
518.915	30291.7	0
519.39	17860.1	0
519.405	34136.1	C30H52O3	[M+Hac-H]-	519.405	-0.48	['(+)-24-Dammarene-3alpha,12beta,20S-triol', 'Myrrhanol A', 'Protopanaxadiol', 'Taraxastane-3beta,16beta,20beta-triol']
519.442	34787.2	0
521.384	18632.6	C29H50O4	[M+Hac-H]-	521.385	-0.56	['2alpha-(3-Hydroxypropyl)-1alpha,25-dihydroxy-19-norvitamin D3']
521.494	24676.5	0
523.256	79644.4	C25H36O8	[M+Hac-H]-	523.255	2.94	['Dehydroepiandrosterone 3-glucuronide', 'Testosterone glucuronide']
523.256	79644.4	C28H42N2O3S	[M+(37Cl)]-	523.258	-3.17	['N-(2-(4-benzenesulfonamide)-ethyl) arachidonoyl amine']
523.364	63158.2	C28H48O5	[M+Hac-H]-	523.364	-0.21	['NA', '7-oxotyphasterol', 'Castasterone', 'Hongguanggenin', 'Trihydroxycoprostanoic acid']
523.4	23148.2	0
523.473	37384	C31H60O2	[M+Hac-H]-	523.473	-0.27	['Hentriacontane-14,16-dione', 'Pentadecyl palmitoleate']
524.26	14263.9	0
524.367	14955.1	0
525.004	23836.8	0
525.282	58972.9	0
525.416	29897.8	0
525.452	25663.3	C32H62O5	[M-H]-	525.452	-0.24	['DG(12:0/17:0/0:0)[iso2]', 'DG(13:0/16:0/0:0)[iso2]']
525.489	100801	C31H62O2	[M+Hac-H]-	525.489	-0.18	['NA', 'D-Mycoceranic acid', 'Mycocerosic acid (C31)', 'Phthioceranic acid (C31)']
526.229	13272.7	0
526.285	20254.8	0
526.411	29334.2	0
526.492	36962.4	0
526.988	32503.1	0
527.001	24140.2	0
527.19	54324.3	0
527.432	22791.7	0
527.447	451083	C35H60O3	[M-H]-	527.447	-0.43	['32,35-anhydrobacteriohopaneterol']
527.468	26762.1	C30H60O3	[M+Hac-H]-	527.468	-0.64	['NA']
528.34	23565.6	0
528.39	19166.2	0
528.45	166599	0
528.937	30290.2	0
529.274	194776	C31H42O5	[M+Cl]-	529.273	1.73	['Norselic acid E']
529.349	13193	C30H52O5	[M+(37Cl)]-	529.348	1.65	['NA', 'Xeniasterol-a']
529.411	22490.1	0
529.462	749605	C35H62O3	[M-H]-	529.463	-0.47	['30-(-2-(O-2-hydroxy-ethane)-3-hydroxy-propane)-hopane']
530.277	53767.7	0
530.466	277959	0
530.934	82438.8	0
531	58596.2	0
531.371	71843	C30H48O4	[M+Hac-H]-	531.369	2.8	['16-Oxolycoclavanol', '26,27-diethyl-1alpha,25-dihydroxy-20,21-didehydro-23-oxavitamin D3 / 26,27-diethyl-1alpha,25-dihydroxy-20,21-didehydro-23-oxacholecalciferol', 'spinosic acid A']
531.409	29413.8	0
531.426	133549	0
531.442	13265.3	C32H56O2	[M+Hac-H]-	531.442	0.07	['32:4(17Z,20Z,23Z,26Z)', 'Linoleyl myristoleate', 'Myristoleyl linolenate']
531.442	13265.3	C34H60O4	[M-H]-	531.442	0.07	['Mayolene-16']
531.469	55335	0
532.43	43185.5	0
532.931	92601.6	0
533.406	25199.2	0
533.421	159957	C33H58O5	[M-H]-	533.421	-0.32	['DG(12:0/18:3(9Z,12Z,15Z)/0:0)[iso2]']
534.369	23830.5	0
534.424	50437.6	0
534.928	56543.9	0
535.266	41553.2	C30H42O6	[M+(37Cl)]-	535.265	2.44	['Cucurbitacin S']
535.366	130426	C29H48O5	[M+Hac-H]-	535.364	3.42	['NA', '1alpha,25-dihydroxy-2beta-(2-hydroxyethoxy)vitamin D3 / 1alpha,25-dihydroxy-2beta-(2-hydroxyethoxy)cholecalciferol']
535.473	201345	C32H60O2	[M+Hac-H]-	535.473	-0.23	['Linoleyl myristate', 'Myristoleyl oleate', 'Myristyl linoleate', 'Oleyl myristoleate', 'Palmitoleyl palmitoleate']
535.521	14630.4	0
536.369	33191.7	0
536.476	71230.9	0
536.505	118786	C34H67NO3	[M-H]-	536.505	-0.18	['Ceramide (d18:1/16:0)']
536.925	21183.4	0
537.017	101527	0
537.379	23567.6	C29H50O5	[M+Hac-H]-	537.38	-0.5	['1alpha,25-dihydroxy-2alpha-(3-hydroxypropoxy)-19-norvitamin D3 / 1alpha,25-dihydroxy-2alpha-(3-hydroxypropoxy)-19-norcholecalciferol', '1alpha,25-dihydroxy-2beta-(3-hydroxypropoxy)-19-norvitamin D3 / 1alpha,25-dihydroxy-2beta-(3-hydroxypropoxy)-19-norcholecalciferol']
537.416	18811.1	0
537.489	419842	C32H62O2	[M+Hac-H]-	537.489	-0.29	['NA', 'Myristoleyl stearate', 'Myristyl oleate', 'Oleyl myristate', 'Palmitoleyl palmitate', 'Palmityl palmitoleate', 'Stearyl myristoleate']
537.508	43283.9	0
538.492	151045	0
538.998	50073.5	0
539.235	12131.6	0
539.414	37793	0
539.432	21418.7	0
539.468	12919.7	C33H64O5	[M-H]-	539.468	-0.26	['DG(12:0/18:0/0:0)[iso2]', 'DG(13:0/17:0/0:0)[iso2]', 'DG(14:0/16:0/0:0)', 'DG(15:0/15:0/0:0)']
539.489	8958.17	0
539.492	27147.3	0
539.504	3.36835e+06	C32H64O2	[M+Hac-H]-	539.504	-0.75	['NA', '1-Hexadecyl hexadecanoate', 'Arachidyl laurate', 'Lacceroic acid', 'Lauryl arachidate', 'Mycocerosic acid (C32)', 'Myristyl stearate', 'Stearyl myristate']
540.245	37533.5	0
540.341	14842.7	0
540.463	22672.8	C30H59NO3	[M+Hac-H]-	540.463	-0.24	['Ceramide (d18:1/12:0)']
540.497	16318.4	0
540.508	1.19316e+06	0
541.213	65623.9	0
541.43	43896.1	0
541.447	19823.3	C30H58O4	[M+Hac-H]-	541.447	-0.28	['Triacontanedioic acid']
541.484	22639.7	C31H62O3	[M+Hac-H]-	541.484	-0.27	['Hydroxyphthioceranic acid (C31)']
541.511	194863	0
542.291	87600.8	0
542.515	26952.6	0
543.21	39370.6	0
543.365	83157.1	C31H54O5	[M+(37Cl)]-	543.364	2.34	['(20R)-24-Hydroxy-19-norgeminivitamin D3', '(20S)-24-Hydroxy-19-norgeminivitamin D3']
543.427	24852.8	C29H56O5	[M+Hac-H]-	543.427	-0.02	['DG(13:0/13:0/0:0)']
543.445	510858	0
544.368	19932.4	0
544.449	198886	C32H63NO3	[M+Cl]-	544.45	-2.53	['N-(Tetradecanoyl)-sphing-4-enine']
544.949	22264.4	0
545.015	191876	0
545.406	11773.4	0
545.442	80115.9	0
546.018	28435.6	0
546.239	26821.3	0
546.32	24939.8	C25H46NO6P	[M+Hac-H]-	546.32	-0.5
546.946	26995.4	0
547.235	118683	C26H42NO7S	[M+Cl]-	547.238	-3.93	['Sulfoglycolithocholate']
547.235	118683	C30H32O6	[M+Hac-H]-	547.234	3.12	['(-)-Sanggenone K', 'Amorin', 'Artelastin', 'Dorsilurin C', 'Epilumaflavanone A', 'Epilumaflavanone B', 'Euchrenone a11', 'Euchrenone a12', 'Flemichin A', 'Rubraflavone D']
547.421	21060.2	0
548.239	32402.2	0
549.375	76823.2	0
550.317	137634	C26H50NO9P	[M-H]-	550.315	3.93	['PS(20:1(11Z)/0:0)']
550.484	21819.2	0
550.52	22068	C35H69NO3	[M-H]-	550.52	-0.27	['Cer(d18:1/17:0)']
551.032	246012	0
551.321	49112.3	0
551.372	25075.8	0
551.468	24927.1	C34H64O5	[M-H]-	551.468	-0.56	['DG(13:0/18:1(9Z)/0:0)[iso2]', 'DG(14:0/17:1(9Z)/0:0)[iso2]', 'DG(14:1(9Z)/17:0/0:0)[iso2]', 'DG(15:0/16:1(9Z)/0:0)', 'DG(15:1(9Z)/16:0/0:0)[iso2]']
551.504	35542.2	C33H64O2	[M+Hac-H]-	551.504	-0.51	['Heptadecyl palmitoleate', 'Tritriacontane-16,18-dione']
552.036	37953.5	0
552.5	66697.6	0
553.447	20922.2	C33H62O6	[M-H]-	553.447	-0.49	['TG(10:0/10:0/10:0)[iso]']
553.484	51072.8	C34H66O5	[M-H]-	553.484	-0.2	['DG(12:0/19:0/0:0)[iso2]', 'DG(13:0/18:0/0:0)[iso2]', 'DG(14:0/17:0/0:0)[iso2]', 'DG(15:0/16:0/0:0)']
553.503	21181.2	0
553.52	65001.6	C33H66O2	[M+Hac-H]-	553.52	-0.35	['NA', 'Heptadecyl-palmitate', 'Mycocerosic acid (C33)', 'Phthioceranic acid (C33)', 'Psyllic acid']
554.346	74873.1	C24H50NO7P	[M+Hac-H]-	554.346	-0.32	['LysoPC(16:0)', 'PC(0:0/16:0)', 'PC(16:0/0:0)[rac]', 'PC(O-14:0/2:0)', 'PE(19:0/0:0)']
554.479	53476.6	0
554.515	63265.6	C34H69NO4	[M-H]-	554.515	-0.08	['Cer(t18:0/16:0)']
555.349	13605.4	0
555.384	37090.7	0
555.441	23731.6	C34H56O2	[M+Hac-H]-	555.442	-1.1	['34:6(16Z,19Z,22Z,25Z,28Z,31Z)']
555.463	23682.3	0
555.499	42357.6	0
555.519	17928.7	0
556.266	29808.8	0
556.422	28590.2	0
557.406	30107.3	0
557.442	33685.6	0
557.457	49981.7	C34H58O2	[M+Hac-H]-	557.458	-0.81	['34:5(16Z,19Z,22Z,25Z,28Z)', '34:5(19Z,22Z,25Z,28Z,31Z)', 'Myristoleyl arachidonate']
557.478	18711.3	0
558.46	12971.4	0
559.422	36862.3	0
559.44	76207.9	0
559.458	45475.9	0
560.444	26841.3	0
561.437	30412.2	0
561.452	41123	C35H62O5	[M-H]-	561.452	-0.14	['DG(12:0/20:3(8Z,11Z,14Z)/0:0)[iso2]', 'DG(14:0/18:3(9Z,12Z,15Z)/0:0)', 'DG(14:1(9Z)/18:2(9Z,12Z)/0:0)', 'DG(15:1(9Z)/17:2(9Z,12Z)/0:0)[iso2]', 'bacteriohopane-31,32,33,34,35-pentol']
561.486	580345	0
562.315	26444.7	C25H46NO7P	[M+Hac-H]-	562.315	-0.19	['LysoPE(20:3(8Z,11Z,14Z)/0:0)']
562.401	41261.3	0
562.49	181394	0
563.255	115656	C27H45O8P	[M+Cl]-	563.255	-0.05	['2-deoxyecdysone 22-phosphate']
563.397	191218	C31H52O5	[M+Hac-H]-	563.395	3.14	['1alpha,25-Dihydroxy-2-[3-(methoxymethoxy)propylidene]-19-norvitamin D3', '1alpha,25-dihydroxy-2beta-(4-hydroxybutoxy)vitamin D3 / 1alpha,25-dihydroxy-2beta-(4-hydroxybutoxy)cholecalciferol']
563.504	151999	C34H64O2	[M+Hac-H]-	563.504	-0.31	['Linoleyl palmitate', 'Oleyl palmitoleate', 'Palmitoleyl oleate', 'Palmityl linoleate']
563.552	32998.7	0
564.204	45583	0
564.258	35322.2	0
564.331	10858.1	C25H48NO7P	[M+Hac-H]-	564.331	1.12	['LysoPE(20:2(11Z,14Z)/0:0)', 'PC(17:2(9Z,12Z)/0:0)']
564.344	320701	0
564.4	53927.3	0
564.508	57854.9	0
564.536	69528.5	C36H71NO3	[M-H]-	564.536	-0.23	['Cer(d18:0/18:1(9Z))', 'Ceramide (d18:1/18:0)']
565.252	76028.4	C27H45O8P	[M+(37Cl)]-	565.252	0.02	['2-deoxyecdysone 22-phosphate']
565.294	46605.8	0
565.347	110635	0
565.52	250775	C34H66O2	[M+Hac-H]-	565.52	-0.43	['NA', 'Arachidyl myristoleate', 'Elaidyl palmitate', 'Myristoleyl arachidate', 'Oleyl palmitate', 'Palmitoleyl stearate', 'Palmityl elaidate', 'Palmityl oleate', 'Stearyl palmitoleate']
565.539	27074.2	0
566.201	25565.3	0
566.479	28542.3	C32H61NO3	[M+Hac-H]-	566.479	-0.24	['Cer(d18:2/14:0)']
566.523	97694.8	0
566.892	21899.9	0
567.463	20725.6	0
567.5	16801.4	C35H68O5	[M-H]-	567.499	0.32	['DG(12:0/20:0/0:0)[iso2]', 'DG(13:0/19:0/0:0)[iso2]', 'DG(14:0/18:0/0:0)', 'DG(15:0/17:0/0:0)[iso2]', 'DG(16:0/16:0/0:0)', 'DG(16:0/16:0/0:0)[rac]']
567.511	17948	0
567.523	16710	0
567.536	1.33019e+06	C34H68O2	[M+Hac-H]-	567.536	-0.34	['Arachidyl myristate', 'Behenyl laurate', 'Gheddic acid', 'Lauryl behenate', 'Mycocerosic acid (C34)', 'Myristyl arachidate', 'Palmityl stearate', 'Phthioceranic acid (C34)', 'Stearyl palmitate']
568.495	124857	C32H63NO3	[M+Hac-H]-	568.495	-0.26	['N-(Tetradecanoyl)-sphing-4-enine']
568.526	5151.18	0
568.539	458458	0
569.461	47909.2	0
569.479	22132.7	0
569.498	43671.5	0
569.532	310717	0
570.51	28843.3	C32H65NO3	[M+Hac-H]-	570.51	-0.03	['Cer(d18:0/14:0)']
570.535	110720	0
571.404	135021	0
571.458	27523.6	C31H60O5	[M+Hac-H]-	571.458	-0.17	['1,2-Dimyristyl-sn-glycerol', 'DG(12:0/16:0/0:0)[iso2]']
571.476	39986.8	0
571.498	62036.8	0
572.407	44657.6	0
572.481	140686	C34H67NO3	[M+Cl]-	572.481	-0.43	['Ceramide (d18:1/16:0)']
573.419	102320	0
573.437	68545.7	C32H62O8	[M-H]-	573.437	-0.23	['NA']
573.474	30772.8	0
573.484	44292.7	0
573.494	15755.2	0
574.423	35537.9	0
574.44	20611.8	0
574.478	43978.9	C34H67NO3	[M+(37Cl)]-	574.479	-0.76	['Ceramide (d18:1/16:0)']
575.124	54773	0
575.435	108181	0
575.453	34620.4	C32H64O8	[M-H]-	575.453	-0.2	['NA']
576.331	167490	C26H48NO7P	[M+Hac-H]-	576.331	-0.3	['LysoPC(18:3(6Z,9Z,12Z))', 'LysoPC(18:3(9Z,12Z,15Z))']
576.331	167490	C28H52NO9P	[M-H]-	576.331	-0.3	['PS(22:2(13Z,16Z)/0:0)']
576.439	39951	0
577.121	32354.8	C24H22O13	[M+Hac-H]-	577.12	2.65	['NA', 'Apigenin 5-(6-malonylglucoside)', 'Apigenin 7-(2-glucuronosyllactate)', 'Apigenin 7-(6-malonylglucoside)', 'Genistein 7-O-glucoside-6-malonate', 'Herbacetin 8-(2,3-diacetylxyloside)']
577.228	54108.7	C23H42O14	[M+Cl]-	577.227	2.06	['NA']
577.334	48145.2	0
578.346	79313.1	C26H50NO7P	[M+Hac-H]-	578.346	-0.39	['LysoPC(18:2(9Z,12Z))', 'PC(18:2(2E,4E)/0:0)']
578.346	79313.1	C28H54NO9P	[M-H]-	578.346	-0.39	['PS(22:1(11Z)/0:0)']
578.515	24987.8	0
579.463	41801.8	0
579.499	21822.7	C36H68O5	[M-H]-	579.499	-0.38	['DG(13:0/20:1(11Z)/0:0)[iso2]', 'DG(14:1(9Z)/19:0/0:0)[iso2]', 'DG(15:0/18:1(9Z)/0:0)', 'DG(15:1(9Z)/18:0/0:0)[iso2]', 'DG(16:0/17:1(9Z)/0:0)[iso2]', 'DG(16:1(9Z)/17:0/0:0)[iso2]']
580.339	43383.4	0
580.362	49666.6	C26H52NO7P	[M+Hac-H]-	580.362	-0.37	['LysoPC(18:1(9Z))', 'PC(0:0/18:1(6Z))', 'PC(0:0/18:1(9E))', 'PC(0:0/18:1(9Z))', 'PC(18:1(6Z)/0:0)', 'PC(18:1(9E)/0:0)', 'PC(18:1(9Z)/0:0)[rac]', 'PC(O-16:1(11Z)/2:0)', 'PC(P-16:0/2:0)']
580.362	49666.6	C28H56NO9P	[M-H]-	580.362	-0.37	['PS(22:0/0:0)']
580.401	38807.4	C27H56NO6P	[M+Hac-H]-	580.398	3.84	['PC(O-18:1(9Z)/O-1:0)']
580.531	41217	0
581.479	24225.2	0
581.515	36531.1	C36H70O5	[M-H]-	581.515	0.48	['DG(12:0/21:0/0:0)[iso2]', 'DG(13:0/20:0/0:0)[iso2]', 'DG(14:0/19:0/0:0)[iso2]', 'DG(15:0/18:0/0:0)', 'DG(16:0/17:0/0:0)[iso2]']
582.474	25919.3	0
582.51	121966	C33H65NO3	[M+Hac-H]-	582.51	-0.12	['Cer(d16:1/17:0)']
582.547	68402.1	0
583.245	104133	C33H40O7	[M+Cl]-	583.247	-2.99	['(+)-Myristinin A']
583.44	50843.5	0
583.494	37700.9	0
583.513	43736.2	0
583.53	24062.6	C34H68O3	[M+Hac-H]-	583.531	-0.53	['Hydroxyphthioceranic acid (C34)']
583.55	25634.7	0
584.248	24525.2	0
584.49	52260.3	0
584.526	34834.1	C33H67NO3	[M+Hac-H]-	584.526	-0.17	['Cer(d18:0/15:0)']
585.203	38130.3	0
585.329	21591.6	0
585.473	58389.6	C32H62O5	[M+Hac-H]-	585.474	-0.25	['DG(12:0/17:0/0:0)[iso2]', 'DG(13:0/16:0/0:0)[iso2]']
585.509	40949	0
586.477	20950.4	0
587.2	21167.2	0
588.467	61400.7	0
589.518	246724	0
590.478	13035.9	0
590.521	92199.5	0
590.552	42223.3	C38H73NO3	[M-H]-	590.552	-0.39	['Cer(d18:2/20:0)']
591.286	159248	0
591.48	22031.1	0
591.583	58417.7	0
592.289	50274.8	0
592.567	146354	C38H75NO3	[M-H]-	592.567	-0.22	['Cer(d16:1/22:0)', 'Ceramide (d18:1/20:0)']
592.587	19232.6	0
592.949	16516.8	0
593.283	99620.3	0
593.551	17124.1	C36H70O2	[M+Hac-H]-	593.551	-0.49	['NA', 'Arachidyl palmitoleate', 'Behenyl myristoleate', 'Myristoleyl behenate', 'Oleyl stearate', 'Palmitoleyl arachidate', 'Stearyl oleate']
593.57	59074.1	0
594.286	30750	0
594.51	35280.4	C34H65NO3	[M+Hac-H]-	594.51	-0.33	['Cer(d18:2/16:0)']
594.946	13823.4	0
595.494	22441.3	0
595.542	68057.7	0
595.567	31651	C36H72O2	[M+Hac-H]-	595.567	-0.63	['Arachidyl palmitate', 'Behenyl myristate', 'Hexatriacontylic acid', 'Myristyl behenate', 'Palmityl arachidate', 'Phthioceranic acid (C36)', 'Stearyl stearate']
596.526	182473	C34H67NO3	[M+Hac-H]-	596.526	-0.28	['Ceramide (d18:1/16:0)']
596.545	24405.9	0
596.567	39138.7	0
597.261	23068.2	0
597.51	34180.5	0
597.529	69291.4	0
597.563	195201	0
598.566	72815.8	0
599.435	201080	0
599.529	104268	0
599.545	8725.16	0
600.369	19709.2	0
600.438	78413.4	0
600.532	35446.1	0
601.505	18419.1	0
602.482	31490.1	0
604.461	95350.9	0
605.259	37357.6	C25H46O14	[M+Cl]-	605.258	1.95	['NA']
605.465	32254.5	0
606.491	31512.3	0
606.547	13059.1	0
607.494	134295	0
609.51	47615.9	C35H66O4	[M+Hac-H]-	609.51	-0.73	['1-O-(1Z-Tetradecenyl)-2-(9Z-octadecenoyl)-sn-glycerol']
609.557	64446.3	0
610.541	66247.5	C35H69NO3	[M+Hac-H]-	610.542	-0.45	['Cer(d18:1/17:0)']
610.561	22796.2	0
610.578	26721.8	0
611.276	66827.9	0
611.525	46469.7	0
612.557	19672.7	C35H71NO3	[M+Hac-H]-	612.557	-0.88	['Cer(d18:0/17:0)']
613.505	61984.2	C34H66O5	[M+Hac-H]-	613.505	-0.29	['DG(12:0/19:0/0:0)[iso2]', 'DG(13:0/18:0/0:0)[iso2]', 'DG(14:0/17:0/0:0)[iso2]', 'DG(15:0/16:0/0:0)']
613.541	30806	0
614.508	18288.1	0
615.458	36573.1	C36H66O5	[M+(37Cl)]-	615.457	0.44	['DG(13:0/20:2(11Z,14Z)/0:0)[iso2]', 'DG(15:0/18:2(9Z,12Z)/0:0)', 'DG(15:1(9Z)/18:1(9Z)/0:0)[iso2]', 'DG(16:0/17:2(9Z,12Z)/0:0)[iso2]', 'DG(16:1(9Z)/17:1(9Z)/0:0)[iso2]']
615.477	17104.9	C36H68O5	[M+Cl]-	615.476	2.18	['DG(13:0/20:1(11Z)/0:0)[iso2]', 'DG(14:1(9Z)/19:0/0:0)[iso2]', 'DG(15:0/18:1(9Z)/0:0)', 'DG(15:1(9Z)/18:0/0:0)[iso2]', 'DG(16:0/17:1(9Z)/0:0)[iso2]', 'DG(16:1(9Z)/17:0/0:0)[iso2]']
615.477	17104.9	C40H60O	[M+Hac-H]-	615.478	-1.38	['Chloroxanthin']
616.461	408262	0
616.498	59956.1	0
617.344	13604.6	0
617.465	145036	C34H66O9	[M-H]-	617.463	2.29	['NA']
617.501	20706.3	0
618.477	631471	0
619.48	218750	C34H68O9	[M-H]-	619.479	2.31	['NA']
620.483	38758.4	0
621.001	14984.5	0
623.573	77766.3	0
624.557	47061.6	C36H71NO3	[M+Hac-H]-	624.557	-0.52	['Cer(d18:0/18:1(9Z))', 'Ceramide (d18:1/18:0)']
624.576	30614.4	0
626.536	30369.2	0
628.544	45527	C38H75NO3	[M+Cl]-	628.544	-0.34	['Cer(d16:1/22:0)', 'Ceramide (d18:1/20:0)']
629.536	98528.4	0
632.493	240059	0
634.471	341279	0
634.522	47032.3	0
635.525	16693.6	0
636.478	24251.1	0
639.365	19992.8	0
645.496	39581.9	C35H71N2O6P	[M-H]-	645.498	-2.71	['SM(d18:1/12:0)']
645.496	39581.9	C36H70O9	[M-H]-	645.495	1.92	['NA']
646.472	77430.8	0
647.475	29335.7	0
655.361	122566	0
655.422	191873	0
655.553	57662.2	C37H72O5	[M+Hac-H]-	655.552	1.18	['DG(12:0/22:0/0:0)[iso2]', 'DG(13:0/21:0/0:0)[iso2]', 'DG(14:0/20:0/0:0)', 'DG(15:0/19:0/0:0)[iso2]', 'DG(16:0/18:0/0:0)', 'DG(17:0/17:0/0:0)', 'DG(18:0/16:0/0:0)']
656.364	49028.3	0
656.425	80175.5	C33H66NO7P	[M+(37Cl)]-	656.424	1.78	['PE(P-16:0/12:0)']
657.532	40162.4	0
657.568	481158	0
658.517	84458.9	0
658.571	211675	C40H79NO3	[M+(37Cl)]-	658.572	-1.62	['Ceramide (d18:1/22:0)']
659.232	93389.8	0
659.575	42245.5	C46H76O2	[M-H]-	659.577	-3.77	['ergosteryl oleate']
660.488	27343	C34H67NO5S	[M+Hac-H]-	660.488	-0.26	['NA']
660.488	27343	C40H63N5O3	[M-H]-	660.486	2.83	['adenosylhopane']
661.228	43471.9	0
661.505	160067	C38H66O5	[M+Hac-H]-	661.505	0.83	['DG(13:0/22:4(7Z,10Z,13Z,16Z)/0:0)[iso2]', 'DG(15:0/20:4(5Z,8Z,11Z,14Z)/0:0)', 'DG(15:1(9Z)/20:3(8Z,11Z,14Z)/0:0)[iso2]', 'DG(17:1(9Z)/18:3(9Z,12Z,15Z)/0:0)[iso2]', 'DG(17:2(9Z,12Z)/18:2(9Z,12Z)/0:0)[iso2]', 'DG(18:3(6Z,9Z,12Z)/17:1(9Z)/0:0)[iso2]', 'DG(18:4(6Z,9Z,12Z,15Z)/17:0/0:0)[iso2]']
665.249	53670.7	0
666.605	46737.1	C39H77NO3	[M+Hac-H]-	666.604	0.6	['Cer(d16:1/23:0)']
669.438	283985	0
669.568	59503.7	C38H74O5	[M+Hac-H]-	669.567	0.88	['DG(13:0/22:0/0:0)[iso2]', 'DG(14:0/21:0/0:0)[iso2]', 'DG(15:0/20:0/0:0)', 'DG(16:0/19:0/0:0)[iso2]', 'DG(17:0/18:0/0:0)[iso2]']
669.641	50441.3	0
670.441	124292	C34H68NO7P	[M+(37Cl)]-	670.44	1.65	['PE(P-16:0/13:0)']
671.49	93629.8	C39H64O5	[M+Hac-H]-	671.489	0.69	['DG(14:0/22:6(4Z,7Z,10Z,13Z,16Z,19Z)/0:0)', 'DG(14:1(9Z)/22:5(7Z,10Z,13Z,16Z,19Z)/0:0)', 'DG(16:1(9Z)/20:5(5Z,8Z,11Z,14Z,17Z)/0:0)', 'DG(18:3(6Z,9Z,12Z)/18:3(6Z,9Z,12Z)/0:0)', 'DG(18:3(6Z,9Z,12Z)/18:3(9Z,12Z,15Z)/0:0)', 'DG(18:3(9Z,12Z,15Z)/18:3(9Z,12Z,15Z)/0:0)', 'DG(18:4(6Z,9Z,12Z,15Z)/18:2(9Z,12Z)/0:0)']
671.521	38460.7	C40H74O5	[M+(37Cl)]-	671.52	1.12	['DG(15:0/22:2(13Z,16Z)/0:0)', 'DG(15:1(9Z)/22:1(11Z)/0:0)[iso2]', 'DG(17:0/20:2(11Z,14Z)/0:0)[iso2]', 'DG(17:1(9Z)/20:1(11Z)/0:0)[iso2]', 'DG(17:2(9Z,12Z)/20:0/0:0)[iso2]', 'DG(18:2(9Z,12Z)/19:0/0:0)[iso2]', 'DG(19:1(9Z)/18:1(9Z)/0:0)[iso2]']
673.247	51078.4	0
673.506	61079.3	C39H66O5	[M+Hac-H]-	673.505	0.97	['DG(14:0/22:5(7Z,10Z,13Z,16Z,19Z)/0:0)', 'DG(14:1(9Z)/22:4(7Z,10Z,13Z,16Z)/0:0)', 'DG(16:0/20:5(5Z,8Z,11Z,14Z,17Z)/0:0)', 'DG(16:1(9Z)/20:4(5Z,8Z,11Z,14Z)/0:0)', 'DG(18:2(9Z,12Z)/18:3(9Z,12Z,15Z)/0:0)', 'DG(18:3(6Z,9Z,12Z)/18:2(9Z,12Z)/0:0)', 'DG(18:4(6Z,9Z,12Z,15Z)/18:1(9Z)/0:0)']
675.244	27541.6	0
675.521	110646	C39H68O5	[M+Hac-H]-	675.521	0.65	['DG(14:0/22:4(7Z,10Z,13Z,16Z)/0:0)', 'DG(14:1(9Z)/22:3(10Z,13Z,16Z)/0:0)[iso2]', 'DG(16:0/20:4(5Z,8Z,11Z,14Z)/0:0)', 'DG(16:1(9Z)/20:3(8Z,11Z,14Z)/0:0)', 'DG(18:1(9Z)/18:3(9Z,12Z,15Z)/0:0)', 'DG(18:2(9Z,12Z)/18:2(9Z,12Z)/0:0)', 'DG(18:3(6Z,9Z,12Z)/18:1(9Z)/0:0)', 'DG(18:4(6Z,9Z,12Z,15Z)/18:0/0:0)']
676.525	41374.4	0
677.537	61618.5	C39H70O5	[M+Hac-H]-	677.536	0.68	['DG(14:0/22:3(10Z,13Z,16Z)/0:0)[iso2]', 'DG(14:1(9Z)/22:2(13Z,16Z)/0:0)', 'DG(16:0/20:3(8Z,11Z,14Z)/0:0)', 'DG(16:1(9Z)/20:2(11Z,14Z)/0:0)', 'DG(18:0/18:3(9Z,12Z,15Z)/0:0)', 'DG(18:1(9Z)/18:2(9Z,12Z)/0:0)', 'DG(18:3(6Z,9Z,12Z)/18:0/0:0)', 'DG(19:1(9Z)/17:2(9Z,12Z)/0:0)[iso2]']
678.604	25581.9	C40H77NO3	[M+Hac-H]-	678.604	0.14	['Cer(d18:2/22:0)']
679.516	179620	0
679.552	60274.2	C39H72O5	[M+Hac-H]-	679.552	0.49	['DG(14:0/22:2(13Z,16Z)/0:0)', 'DG(14:1(9Z)/22:1(11Z)/0:0)[iso2]', 'DG(16:0/20:2(11Z,14Z)/0:0)', 'DG(16:1(9Z)/20:1(11Z)/0:0)', 'DG(17:2(9Z,12Z)/19:0/0:0)[iso2]', 'DG(18:0/18:2(9Z,12Z)/0:0)', 'DG(18:1(9Z)/18:1(9Z)/0:0)', 'DG(19:1(9Z)/17:1(9Z)/0:0)[iso2]']
680.519	77698.8	0
680.62	91082	C40H79NO3	[M+Hac-H]-	680.62	0.09	['Ceramide (d18:1/22:0)']
681.568	21877	C39H74O5	[M+Hac-H]-	681.567	0.74	['DG(14:0/22:1(11Z)/0:0)[iso2]', 'DG(14:1(9Z)/22:0/0:0)', 'DG(15:1(9Z)/21:0/0:0)[iso2]', 'DG(16:0/20:1(11Z)/0:0)', 'DG(16:1(9Z)/20:0/0:0)', 'DG(17:1(9Z)/19:0/0:0)[iso2]', 'DG(18:0/18:1(9Z)/0:0)', 'DG(19:1(9Z)/17:0/0:0)[iso2]']
681.624	32072.3	0
681.677	41740.5	0
683.584	80985.5	C39H76O5	[M+Hac-H]-	683.583	0.92	['DG(14:0/22:0/0:0)', 'DG(15:0/21:0/0:0)[iso2]', 'DG(16:0/20:0/0:0)', 'DG(17:0/19:0/0:0)[iso2]', 'DG(18:0/18:0/0:0)', 'DG(18:0/18:0/0:0)[rac]']
683.656	24878.4	0
684.461	52920.1	C37H68NO8P	[M-H]-	684.461	0.54	['PE(12:0/20:3(8Z,11Z,14Z))', 'PE(14:0/18:3(6Z,9Z,12Z))', 'PE(14:0/18:3(9Z,12Z,15Z))', 'PE(14:1(9Z)/18:2(9Z,12Z))', 'PE(15:1(9Z)/17:2(9Z,12Z))', 'PE(17:2(9Z,12Z)/15:1(9Z))', 'PE(18:2(9Z,12Z)/14:1(9Z))', 'PE(18:3(6Z,9Z,12Z)/14:0)', 'PE(18:3(9Z,12Z,15Z)/14:0)', 'PE(20:3(8Z,11Z,14Z)/12:0)']
684.587	23516.5	C42H81NO3	[M+(37Cl)]-	684.588	-1.29	['Ceramide (d18:1/24:1(15Z))']
685.563	76771.6	C40H78O8	[M-H]-	685.562	0.29	['NA']
685.599	441582	0
686.477	148625	C37H70NO8P	[M-H]-	686.477	0.22	['PC(12:0/17:2(9Z,12Z))', 'PC(14:1(9Z)/15:1(9Z))', 'PC(15:1(9Z)/14:1(9Z))', 'PC(17:2(9Z,12Z)/12:0)', 'PE(12:0/20:2(11Z,14Z))', 'PE(14:0/18:2(9Z,12Z))', 'PE(14:1(9Z)/18:1(9Z))', 'PE(15:0/17:2(9Z,12Z))', 'PE(15:1(9Z)/17:1(9Z))', 'PE(16:1(11Z)/16:1(11Z))', 'PE(16:1(5Z)/16:1(5Z))', 'PE(16:1(9Z)/16:1(9Z))', 'PE(17:1(9Z)/15:1(9Z))', 'PE(17:2(9Z,12Z)/15:0)', 'PE(18:1(9Z)/14:1(9Z))', 'PE(18:2(9Z,12Z)/14:…
686.602	198420	C42H83NO3	[M+(37Cl)]-	686.604	-2.08	['Cer(d18:0/24:1(15Z))', 'Ceramide (d18:1/24:0)']
687.262	106587	0
687.48	54660.3	0
687.544	51390.3	C38H77N2O6P	[M-H]-	687.545	-0.49	['Etn-1-P-Cer(d14:1/18:0)', 'SM(d16:1/17:0)', 'SM(d18:1/15:0)']
687.606	36726.5	0
688.492	114471	C37H72NO8P	[M-H]-	688.492	0.07	['PC(12:0/17:1(9Z))', 'PC(13:0/16:1(9Z))', 'PC(14:0/15:1(9Z))', 'PC(14:1(9Z)/15:0)', 'PC(15:0/14:1(9Z))', 'PC(15:1(9Z)/14:0)', 'PC(16:1(9Z)/13:0)', 'PC(17:1(9Z)/12:0)', 'PC(18:0/11:1(10E))', 'PE(12:0/20:1(11Z))', 'PE(13:0/19:1(9Z))', 'PE(14:0/18:1(9Z))', 'PE(14:1(9Z)/18:0)', 'PE(15:0/17:1(9Z))', 'PE(15:1(9Z)/17:0)', 'PE(16:0/16:1(9Z))', 'PE(16:1(9Z)/16:0)', 'PE(17:0/15:1(9Z))', 'PE(17:1(9Z)/15:0)…
689.259	38921.5	0
691.195	29698.6	0
691.397	229320	0
693.192	81113.3	0
693.28	54577.7	0
693.356	101828	C31H61O12P	[M+(37Cl)]-	693.357	-0.35	['PI(22:0/0:0)']
693.386	57515.9	C35H54O10	[M+Hac-H]-	693.386	0.74	['Pandaroside B']
693.398	648372	0
693.411	1.55198e+07	0
693.442	19616.9	C35H66O13	[M-H]-	693.443	-1.96	['methyl 13-sophorosyloxydocosanoate']
694.36	34467.8	0
694.39	25415.1	0
694.415	6.80147e+06	0
694.482	61643.6	C39H70NO7P	[M-H]-	694.482	-0.2	['PE(P-16:0/18:4(6Z,9Z,12Z,15Z))']
695.006	33372.3	0
695.189	82388.9	0
695.364	16349.6	0
695.375	33360.7	0
695.387	43220.5	0
695.393	79325.8	C42H58O6	[M+(37Cl)]-	695.39	3.98	['fucoxanthin']
695.413	2.3383e+06	C32H61O10P	[M+Hac-H]-	695.414	-2.22	['PG(12:0/14:1(9Z))', 'PG(14:1(9Z)/12:0)']
695.426	9.56406e+07	C36H67O8P	[M+(37Cl)]-	695.424	2.45	['PA(13:0/20:2(11Z,14Z))', 'PA(14:1(9Z)/19:1(9Z))', 'PA(15:0/18:2(9Z,12Z))', 'PA(15:1(9Z)/18:1(9Z))', 'PA(16:0/17:2(9Z,12Z))', 'PA(16:1(9Z)/17:1(9Z))', 'PA(17:1(9Z)/16:1(9Z))', 'PA(17:2(9Z,12Z)/16:0)', 'PA(18:1(9Z)/15:1(9Z))', 'PA(18:2(9Z,12Z)/15:0)', 'PA(19:1(9Z)/14:1(9Z))', 'PA(20:2(11Z,14Z)/13:0)']
695.443	368550	C36H69O8P	[M+Cl]-	695.442	1.41	['PA(13:0/20:1(11Z))', 'PA(14:0/19:1(9Z))', 'PA(14:1(9Z)/19:0)', 'PA(15:0/18:1(9Z))', 'PA(15:1(9Z)/18:0)', 'PA(16:0/17:1(9Z))', 'PA(16:1(9Z)/17:0)', 'PA(17:0/16:1(9Z))', 'PA(17:1(9Z)/16:0)', 'PA(18:0/15:1(9Z))', 'PA(18:1(9Z)/15:0)', 'PA(19:0/14:1(9Z))', 'PA(19:1(9Z)/14:0)', 'PA(20:1(11Z)/13:0)']
695.443	368550	C43H64O5	[M+Cl]-	695.445	-1.99	['DG(18:4(6Z,9Z,12Z,15Z)/22:6(4Z,7Z,10Z,13Z,16Z,19Z)/0:0)', 'DG(20:5(5Z,8Z,11Z,14Z,17Z)/20:5(5Z,8Z,11Z,14Z,17Z)/0:0)']
695.45	203091	0
695.461	60183.3	C37H71O7P	[M+(37Cl)]-	695.46	1.46	['PA(O-16:0/18:2(9Z,12Z))', 'PA(P-16:0/18:1(9Z))', 'PA(P-18:0/16:1(9Z))', 'PA(P-20:0/14:1(9Z))']
695.48	23612	C37H73O7P	[M+Cl]-	695.479	2.41	['PA(O-16:0/18:1(9Z))', 'PA(O-18:0/16:1(9Z))', 'PA(O-20:0/14:1(9Z))', 'PA(P-16:0/18:0)', 'PA(P-18:0/16:0)', 'PA(P-20:0/14:0)']
695.509	20410.4	0
696.39	20765.5	0
696.396	32912.7	0
696.403	73238.7	0
696.417	1.24714e+06	C35H66NO8P	[M+(37Cl)]-	696.419	-2.4	['PE(12:0/18:2(9Z,12Z))', 'PE(13:0/17:2(9Z,12Z))', 'PE(14:1(9Z)/16:1(9Z))', 'PE(15:1(9Z)/15:1(9Z))', 'PE(16:1(9Z)/14:1(9Z))', 'PE(17:2(9Z,12Z)/13:0)', 'PE(18:2(9Z,12Z)/12:0)']
696.429	3.76161e+07	C35H67NO8S	[M+Cl]-	696.428	1.79	['NA']
696.448	104974	0
696.454	66739.8	C36H70NO7P	[M+(37Cl)]-	696.455	-2.25	['PE(P-16:0/15:1(9Z))']
696.461	40439.7	C38H68NO8P	[M-H]-	696.461	-0.52	['PC(12:0/18:4(6Z,9Z,12Z,15Z))', 'PC(18:4(6Z,9Z,12Z,15Z)/12:0)', 'PE(13:0/20:4(5Z,8Z,11Z,14Z))', 'PE(15:0/18:4(6Z,9Z,12Z,15Z))', 'PE(15:1(9Z)/18:3(6Z,9Z,12Z))', 'PE(15:1(9Z)/18:3(9Z,12Z,15Z))', 'PE(18:3(6Z,9Z,12Z)/15:1(9Z))', 'PE(18:3(9Z,12Z,15Z)/15:1(9Z))', 'PE(18:4(6Z,9Z,12Z,15Z)/15:0)', 'PE(20:4(5Z,8Z,11Z,14Z)/13:0)']
696.461	40439.7	C40H63N5O3	[M+Cl]-	696.462	-2.69	['adenosylhopane']
696.496	446309	C39H72NO7P	[M-H]-	696.497	-1.67	['NA', 'PE(O-16:0/18:4(6Z,9Z,12Z,15Z))', 'PE(P-16:0/18:3(6Z,9Z,12Z))', 'PE(P-16:0/18:3(9Z,12Z,15Z))']
697.186	37313.9	0
697.408	55596.6	C35H59O8P	[M+Hac-H]-	697.409	-0.36	['PA(12:0/20:5(5Z,8Z,11Z,14Z,17Z))', 'PA(14:1(9Z)/18:4(6Z,9Z,12Z,15Z))', 'PA(18:4(6Z,9Z,12Z,15Z)/14:1(9Z))', 'PA(20:5(5Z,8Z,11Z,14Z,17Z)/12:0)']
697.433	7.98021e+06	0
697.5	186317	0
697.671	64756.4	0
698.437	1.08513e+06	C35H68NO8P	[M+(37Cl)]-	698.435	3.28	['PC(12:0/15:1(9Z))', 'PC(13:0/14:1(9Z))', 'PC(14:1(9Z)/13:0)', 'PC(15:1(9Z)/12:0)', 'PE(12:0/18:1(9Z))', 'PE(13:0/17:1(9Z))', 'PE(14:0/16:1(9Z))', 'PE(14:1(9Z)/16:0)', 'PE(15:0/15:1(9Z))', 'PE(15:1(9Z)/15:0)', 'PE(16:0/14:1(9Z))', 'PE(16:1(9Z)/14:0)', 'PE(17:1(9Z)/13:0)', 'PE(18:1(9Z)/12:0)']
698.513	336289	C39H74NO7P	[M-H]-	698.513	-0.19	['PE(O-16:0/18:3(6Z,9Z,12Z))', 'PE(O-16:0/18:3(9Z,12Z,15Z))', 'PE(P-16:0/18:2(9Z,12Z))']
698.574	33701.8	0
699.439	149849	C35H69O9P	[M+Cl]-	699.437	2.91	['PG(P-16:0/13:0)']
699.516	149972	0
699.578	98362.4	C41H80O8	[M-H]-	699.578	-0.16	['Crasseride 2a']
700.529	132055	C39H76NO7P	[M-H]-	700.529	0.29	['PC(P-16:0/15:1(9Z))', 'PE(O-16:0/18:2(9Z,12Z))', 'PE(P-16:0/18:1(9Z))', 'PE(P-18:0/16:1(9Z))', 'PE(P-20:0/14:1(9Z))', 'PnE(16:0/18:1(9Z))']
700.582	32547.1	0
701.023	38583.5	0
701.494	71641.4	C43H70O5	[M+Cl]-	701.492	3.5	['DG(18:1(9Z)/22:6(4Z,7Z,10Z,13Z,16Z,19Z)/0:0)', 'DG(18:2(9Z,12Z)/22:5(7Z,10Z,13Z,16Z,19Z)/0:0)', 'DG(18:3(6Z,9Z,12Z)/22:4(7Z,10Z,13Z,16Z)/0:0)', 'DG(18:3(9Z,12Z,15Z)/22:4(7Z,10Z,13Z,16Z)/0:0)', 'DG(18:4(6Z,9Z,12Z,15Z)/22:3(10Z,13Z,16Z)/0:0)[iso2]', 'DG(20:2(11Z,14Z)/20:5(5Z,8Z,11Z,14Z,17Z)/0:0)', 'DG(20:3(8Z,11Z,14Z)/20:4(5Z,8Z,11Z,14Z)/0:0)']
703.004	19676.2	0
707.391	60712.1	0
709.022	72722.8	0
709.407	817776	0
709.481	49602.9	C40H71O8P	[M-H]-	709.481	-0.12	['PA(15:0/22:4(7Z,10Z,13Z,16Z))', 'PA(17:0/20:4(5Z,8Z,11Z,14Z))', 'PA(17:1(9Z)/20:3(8Z,11Z,14Z))', 'PA(17:2(9Z,12Z)/20:2(11Z,14Z))', 'PA(18:3(6Z,9Z,12Z)/19:1(9Z))', 'PA(18:3(9Z,12Z,15Z)/19:1(9Z))', 'PA(18:4(6Z,9Z,12Z,15Z)/19:0)', 'PA(19:0/18:4(6Z,9Z,12Z,15Z))', 'PA(19:1(9Z)/18:3(6Z,9Z,12Z))', 'PA(19:1(9Z)/18:3(9Z,12Z,15Z))', 'PA(20:2(11Z,14Z)/17:2(9Z,12Z))', 'PA(20:3(8Z,11Z,14Z)/17:1(9Z))', 'PA(2…
710.41	339238	0
710.476	171601	C39H70NO8P	[M-H]-	710.477	-0.39	['PC(13:0/18:4(6Z,9Z,12Z,15Z))', 'PC(18:4(6Z,9Z,12Z,15Z)/13:0)', 'PE(12:0/22:4(7Z,10Z,13Z,16Z))', 'PE(14:0/20:4(5Z,8Z,11Z,14Z))', 'PE(14:1(9Z)/20:3(8Z,11Z,14Z))', 'PE(16:0/18:4(6Z,9Z,12Z,15Z))', 'PE(16:1(9Z)/18:3(6Z,9Z,12Z))', 'PE(16:1(9Z)/18:3(9Z,12Z,15Z))', 'PE(17:2(9Z,12Z)/17:2(9Z,12Z))', 'PE(18:3(6Z,9Z,12Z)/16:1(9Z))', 'PE(18:3(9Z,12Z,15Z)/16:1(9Z))', 'PE(18:4(6Z,9Z,12Z,15Z)/16:0)', 'PE(20:3(…
711.423	354207	C36H61O8P	[M+Hac-H]-	711.424	-2.08	['PA(13:0/20:5(5Z,8Z,11Z,14Z,17Z))', 'PA(15:1(9Z)/18:4(6Z,9Z,12Z,15Z))', 'PA(18:4(6Z,9Z,12Z,15Z)/15:1(9Z))', 'PA(20:5(5Z,8Z,11Z,14Z,17Z)/13:0)']
711.423	354207	C38H65O10P	[M-H]-	711.424	-2.08	['PG(12:0/20:5(5Z,8Z,11Z,14Z,17Z))', 'PG(14:1(9Z)/18:4(6Z,9Z,12Z,15Z))', 'PG(18:4(6Z,9Z,12Z,15Z)/14:1(9Z))', 'PG(20:5(5Z,8Z,11Z,14Z,17Z)/12:0)']
711.48	68922.5	C34H69O9P	[M+Hac-H]-	711.482	-2.79	['PG(O-16:0/12:0)']
712.426	103791	0
712.492	935783	C39H72NO8P	[M-H]-	712.492	0.03	['PC(13:0/18:3(6Z,9Z,12Z))', 'PC(13:0/18:3(9Z,12Z,15Z))', 'PC(14:1(9Z)/17:2(9Z,12Z))', 'PC(17:2(9Z,12Z)/14:1(9Z))', 'PC(18:3(6Z,9Z,12Z)/13:0)', 'PC(18:3(9Z,12Z,15Z)/13:0)', 'PE(14:0/20:3(8Z,11Z,14Z))', 'PE(14:1(9Z)/20:2(11Z,14Z))', 'PE(16:0/18:3(6Z,9Z,12Z))', 'PE(16:0/18:3(9Z,12Z,15Z))', 'PE(16:1(9Z)/18:2(9Z,12Z))', 'PE(17:1(9Z)/17:2(9Z,12Z))', 'PE(17:2(9Z,12Z)/17:1(9Z))', 'PE(18:2(9Z,12Z)/16:1(9…
713.496	367579	0
714.508	371958	C39H74NO8P	[M-H]-	714.508	0.28	['PC(13:0/18:2(9Z,12Z))', 'PC(14:0/17:2(9Z,12Z))', 'PC(14:1(9Z)/17:1(9Z))', 'PC(15:1(9Z)/16:1(9Z))', 'PC(16:1(9Z)/15:1(9Z))', 'PC(17:1(9Z)/14:1(9Z))', 'PC(17:2(9Z,12Z)/14:0)', 'PC(18:2(9Z,12Z)/13:0)', 'PE(12:0/22:2(13Z,16Z))', 'PE(14:0/20:2(11Z,14Z))', 'PE(14:1(9Z)/20:1(11Z))', 'PE(15:1(9Z)/19:1(9Z))', 'PE(16:0/18:2(9Z,12Z))', 'PE(16:1(9Z)/18:1(9Z))', 'PE(17:0/17:2(9Z,12Z))', 'PE(17:1(9Z)/17:1(9Z…
715.395	10973.4	C38H63O8P	[M+(37Cl)]-	715.393	3.08	['PA(13:0/22:6(4Z,7Z,10Z,13Z,16Z,19Z))', 'PA(15:1(9Z)/20:5(5Z,8Z,11Z,14Z,17Z))', 'PA(17:2(9Z,12Z)/18:4(6Z,9Z,12Z,15Z))', 'PA(18:4(6Z,9Z,12Z,15Z)/17:2(9Z,12Z))', 'PA(20:5(5Z,8Z,11Z,14Z,17Z)/15:1(9Z))', 'PA(22:6(4Z,7Z,10Z,13Z,16Z,19Z)/13:0)']
715.512	314459	0
715.577	253296	C40H81N2O6P	[M-H]-	715.576	0.77	['SM(d18:1/17:0)', 'SM(d19:1/16:0)']
716.524	841221	C39H76NO8P	[M-H]-	716.524	0.79	['PC(12:0/19:1(9Z))', 'PC(13:0/18:1(9Z))', 'PC(14:0/17:1(9Z))', 'PC(14:1(9Z)/17:0)', 'PC(15:0/16:1(9Z))', 'PC(15:1(9Z)/16:0)', 'PC(16:0/15:1(14))', 'PC(16:0/15:1(9Z))', 'PC(16:1(9Z)/15:0)', 'PC(17:0/14:1(9Z))', 'PC(17:1(9Z)/14:0)', 'PC(18:1(9Z)/13:0)', 'PC(19:1(9Z)/12:0)', 'PE(12:0/22:1(11Z))', 'PE(14:0/20:1(11Z))', 'PE(14:1(9Z)/20:0)', 'PE(15:0/19:1(9Z))', 'PE(15:1(9Z)/19:0)', 'PE(16:0/18:1(11Z)…
716.538	7815.58	0
716.58	114529	0
717.381	7055.13	0
717.471	74840.6	C36H67O8P	[M+Hac-H]-	717.471	-0.17	['PA(13:0/20:2(11Z,14Z))', 'PA(14:1(9Z)/19:1(9Z))', 'PA(15:0/18:2(9Z,12Z))', 'PA(15:1(9Z)/18:1(9Z))', 'PA(16:0/17:2(9Z,12Z))', 'PA(16:1(9Z)/17:1(9Z))', 'PA(17:1(9Z)/16:1(9Z))', 'PA(17:2(9Z,12Z)/16:0)', 'PA(18:1(9Z)/15:1(9Z))', 'PA(18:2(9Z,12Z)/15:0)', 'PA(19:1(9Z)/14:1(9Z))', 'PA(20:2(11Z,14Z)/13:0)']
735.481	749362	C36H69O9P	[M+Hac-H]-	735.482	-1.74	['PG(P-16:0/14:1(9Z))']
717.527	362317	0
717.583	25583.7	C41H83O7P	[M-H]-	717.58	3.03	['PA(O-16:0/22:0)', 'PA(O-18:0/20:0)', 'PA(O-20:0/18:0)']
718.473	22457.2	0
718.54	218277	C39H78NO8P	[M-H]-	718.539	0.85	['PC(10:0/21:0)', 'PC(11:0/20:0)', 'PC(12:0/19:0)', 'PC(13:0/18:0)', 'PC(14:0/17:0)', 'PC(15:0/16:0)', 'PC(16:0/15:0)', 'PC(17:0/14:0)', 'PC(18:0/13:0)', 'PC(19:0/12:0)', 'PC(20:0/11:0)', 'PC(21:0/10:0)', 'PC(9:0/22:0)', 'PE(12:0/22:0)', 'PE(13:0/21:0)', 'PE(14:0/20:0)', 'PE(15:0/19:0)', 'PE(16:0/18:0)', 'PE(17:0/17:0)', 'PE(18:0/16:0)', 'PE(19:0/15:0)', 'PE(20:0/14:0)', 'PE(21:0/13:0)', 'PE(22:0…
719.448	186445	0
719.487	62742.7	C36H69O8P	[M+Hac-H]-	719.487	-0.17	['PA(13:0/20:1(11Z))', 'PA(14:0/19:1(9Z))', 'PA(14:1(9Z)/19:0)', 'PA(15:0/18:1(9Z))', 'PA(15:1(9Z)/18:0)', 'PA(16:0/17:1(9Z))', 'PA(16:1(9Z)/17:0)', 'PA(17:0/16:1(9Z))', 'PA(17:1(9Z)/16:0)', 'PA(18:0/15:1(9Z))', 'PA(18:1(9Z)/15:0)', 'PA(19:0/14:1(9Z))', 'PA(19:1(9Z)/14:0)', 'PA(20:1(11Z)/13:0)']
737.496	1.12723e+06	C36H71O9P	[M+Hac-H]-	737.497	-1.8	['PG(O-16:0/14:1(9Z))', 'PG(P-16:0/14:0)', 'PG(P-18:0/12:0)']
719.487	62742.7	C43H64O5	[M+Hac-H]-	719.489	-3.46	['DG(18:4(6Z,9Z,12Z,15Z)/22:6(4Z,7Z,10Z,13Z,16Z,19Z)/0:0)', 'DG(20:5(5Z,8Z,11Z,14Z,17Z)/20:5(5Z,8Z,11Z,14Z,17Z)/0:0)']
719.543	88405.9	0
719.95	162519	0
720.456	155157	0
720.499	97581.5	C41H72NO7P	[M-H]-	720.497	1.91	['PE(P-16:0/20:5(5Z,8Z,11Z,14Z,17Z))']
720.547	16562.1	0
720.958	139409	0
721.482	69168.4	C41H71O8P	[M-H]-	721.481	0.82	['PA(16:1(9Z)/22:4(7Z,10Z,13Z,16Z))', 'PA(18:0/20:5(5Z,8Z,11Z,14Z,17Z))', 'PA(18:1(9Z)/20:4(5Z,8Z,11Z,14Z))', 'PA(18:2(9Z,12Z)/20:3(8Z,11Z,14Z))', 'PA(18:3(6Z,9Z,12Z)/20:2(11Z,14Z))', 'PA(18:3(9Z,12Z,15Z)/20:2(11Z,14Z))', 'PA(18:4(6Z,9Z,12Z,15Z)/20:1(11Z))', 'PA(20:1(11Z)/18:4(6Z,9Z,12Z,15Z))', 'PA(20:2(11Z,14Z)/18:3(6Z,9Z,12Z))', 'PA(20:2(11Z,14Z)/18:3(9Z,12Z,15Z))', 'PA(20:3(8Z,11Z,14Z)/18:2(9Z…
721.501	52581	C36H71O8P	[M+Hac-H]-	721.503	-1.49	['PA(12:0/21:0)', 'PA(13:0/20:0)', 'PA(14:0/19:0)', 'PA(15:0/18:0)', 'PA(16:0/17:0)', 'PA(17:0/16:0)', 'PA(18:0/15:0)', 'PA(19:0/14:0)', 'PA(20:0/13:0)', 'PA(21:0/12:0)']
739.512	2.03429e+06	C36H73O9P	[M+Hac-H]-	739.513	-1.89	['Mannosyl-1beta-phosphomycoketide C30', 'PG(O-16:0/14:0)', 'PG(O-18:0/12:0)']
721.966	59161	0
722.485	27669.7	0
722.514	130512	C41H74NO7P	[M-H]-	722.513	0.8	['PE(O-16:0/20:5(5Z,8Z,11Z,14Z,17Z))', 'PE(P-16:0/20:4(5Z,8Z,11Z,14Z))', 'PE(P-18:0/18:4(6Z,9Z,12Z,15Z))']
723.498	37229.8	C41H73O8P	[M-H]-	723.497	1.63	['PA(16:0/22:4(7Z,10Z,13Z,16Z))', 'PA(18:0/20:4(5Z,8Z,11Z,14Z))', 'PA(18:1(9Z)/20:3(8Z,11Z,14Z))', 'PA(18:2(9Z,12Z)/20:2(11Z,14Z))', 'PA(18:3(6Z,9Z,12Z)/20:1(11Z))', 'PA(18:3(9Z,12Z,15Z)/20:1(11Z))', 'PA(18:4(6Z,9Z,12Z,15Z)/20:0)', 'PA(20:0/18:4(6Z,9Z,12Z,15Z))', 'PA(20:1(11Z)/18:3(6Z,9Z,12Z))', 'PA(20:1(11Z)/18:3(9Z,12Z,15Z))', 'PA(20:2(11Z,14Z)/18:2(9Z,12Z))', 'PA(20:3(8Z,11Z,14Z)/18:1(9Z))', '…
723.517	59533.7	0
724.493	86199.3	C40H72NO8P	[M-H]-	724.492	0.39	['PC(12:0/20:4(5Z,8Z,11Z,14Z))', 'PC(14:0/18:4(6Z,9Z,12Z,15Z))', 'PC(14:0/18:4(9E,11E,13E,15E))', 'PC(14:1(9Z)/18:3(6Z,9Z,12Z))', 'PC(14:1(9Z)/18:3(9Z,12Z,15Z))', 'PC(16:0/16:4(2E,4E,12E,14E))', 'PC(16:2(2E,4E)/16:2(2E,4E))', 'PC(18:3(6Z,9Z,12Z)/14:1(9Z))', 'PC(18:3(9Z,12Z,15Z)/14:1(9Z))', 'PC(18:4(6Z,9Z,12Z,15Z)/14:0)', 'PC(20:4(5Z,8Z,11Z,14Z)/12:0)', 'PE(13:0/22:4(7Z,10Z,13Z,16Z))', 'PE(15:0/20…
724.529	182524	C41H76NO7P	[M-H]-	724.529	0.81	['PE(O-16:0/20:4(5Z,8Z,11Z,14Z))', 'PE(O-18:0/18:4(6Z,9Z,12Z,15Z))', 'PE(P-16:0/20:3(8Z,11Z,14Z))', 'PE(P-18:0/18:3(6Z,9Z,12Z))', 'PE(P-18:0/18:3(9Z,12Z,15Z))']
725.532	83584.4	0
726.508	171607	C40H74NO8P	[M-H]-	726.508	0.69	['PC(12:0/20:3(8Z,11Z,14Z))', 'PC(14:0/18:3(6Z,9Z,12Z))', 'PC(14:0/18:3(9Z,12Z,15Z))', 'PC(14:1(9Z)/18:2(9Z,12Z))', 'PC(15:1(9Z)/17:2(9Z,12Z))', 'PC(17:2(9Z,12Z)/15:1(9Z))', 'PC(18:2(9Z,12Z)/14:1(9Z))', 'PC(18:3(6Z,9Z,12Z)/14:0)', 'PC(18:3(9Z,12Z,15Z)/14:0)', 'PC(20:3(8Z,11Z,14Z)/12:0)', 'PE(15:0/20:3(8Z,11Z,14Z))', 'PE(15:1(9Z)/20:2(11Z,14Z))', 'PE(17:0/18:3(6Z,9Z,12Z))', 'PE(17:0/18:3(9Z,12Z,15…
726.545	133473	C41H78NO7P	[M-H]-	726.544	1.08	['PC(P-16:0/17:2(9Z,12Z))', 'PE(O-16:0/20:3(8Z,11Z,14Z))', 'PE(O-18:0/18:3(6Z,9Z,12Z))', 'PE(O-18:0/18:3(9Z,12Z,15Z))', 'PE(P-16:0/20:2(11Z,14Z))', 'PE(P-18:0/18:2(9Z,12Z))']
727.512	73003.5	0
727.548	60902.9	C43H78O6	[M+(37Cl)]-	727.546	2.61	['TG(12:0/14:1(9Z)/14:1(9Z))[iso3]']
728.524	111097	C40H76NO8P	[M-H]-	728.524	0.3	['PC(12:0/20:2(11Z,14Z))', 'PC(14:0/18:2(11Z,14Z))', 'PC(14:0/18:2(9Z,12Z))', 'PC(14:1(9Z)/18:1(9Z))', 'PC(15:0/17:2(9Z,12Z))', 'PC(15:1(9Z)/17:1(9Z))', 'PC(16:1(9E)/16:1(9E))', 'PC(16:1(9Z)/16:1(9Z))', 'PC(17:1(9Z)/15:1(9Z))', 'PC(17:2(9Z,12Z)/15:0)', 'PC(18:1(9Z)/14:1(9Z))', 'PC(18:2(9Z,12Z)/14:0)', 'PC(20:2(11Z,14Z)/12:0)', 'PE(13:0/22:2(13Z,16Z))', 'PE(15:0/20:2(11Z,14Z))', 'PE(15:1(9Z)/20:1(…
728.561	44873.7	C41H80NO7P	[M-H]-	728.56	0.83	['PC(O-16:0/17:2(9Z,12Z))', 'PC(P-16:0/17:1(9Z))', 'PC(P-18:0/15:1(9Z))', 'PE(O-16:0/20:2(11Z,14Z))', 'PE(O-18:0/18:2(9Z,12Z))', 'PE(P-16:0/20:1(11Z))', 'PE(P-18:0/18:1(9Z))', 'PE(P-20:0/16:1(9Z))']
729.527	48987.7	0
729.564	20385	C43H80O6	[M+(37Cl)]-	729.562	2.77	['TG(12:0/12:0/16:1(9Z))[iso3]', 'TG(12:0/13:0/15:1(9Z))[iso6]', 'TG(12:0/14:0/14:1(9Z))[iso6]', 'TG(13:0/13:0/14:1(9Z))[iso3]']
729.592	25162.9	C41H83N2O6P	[M-H]-	729.592	1.01	['SM(d16:1/20:0)', 'SM(d18:0/18:1(9Z))', 'SM(d18:1/18:0)']
730.54	88380.9	C40H78NO8P	[M-H]-	730.539	0.92	['PC(12:0/20:1(11Z))', 'PC(13:0/19:1(9Z))', 'PC(14:0/18:1(11Z))', 'PC(14:0/18:1(9Z))', 'PC(14:1(9Z)/18:0)', 'PC(15:0/17:1(9Z))', 'PC(15:1(9Z)/17:0)', 'PC(16:0/16:1(9Z))', 'PC(16:1(9Z)/16:0)', 'PC(17:0/15:1(9Z))', 'PC(17:1(9Z)/15:0)', 'PC(18:0/14:1(9Z))', 'PC(18:1(9Z)/14:0)', 'PC(19:1(9Z)/13:0)', 'PC(20:1(11Z)/12:0)', 'PE(13:0/22:1(11Z))', 'PE(14:1(9Z)/21:0)', 'PE(15:0/20:1(11Z))', 'PE(15:1(9Z)/20…
730.576	23384.7	C41H82NO7P	[M-H]-	730.576	0.65	['PC(O-16:0/17:1(9Z))', 'PC(O-18:0/15:1(9Z))', 'PC(P-16:0/17:0)', 'PC(P-18:0/15:0)', 'PC(P-20:0/13:0)', 'PE(O-16:0/20:1(11Z))', 'PE(O-18:0/18:1(9Z))', 'PE(O-20:0/16:1(9Z))', 'PE(P-16:0/20:0)', 'PE(P-20:0/16:0)', 'PE(dm18:0/18:0)']
731.543	39296	0
733.503	8708.66	C37H71O8P	[M+Hac-H]-	733.503	0.41	['PA(12:0/22:1(11Z))', 'PA(14:0/20:1(11Z))', 'PA(14:1(9Z)/20:0)', 'PA(15:0/19:1(9Z))', 'PA(15:1(9Z)/19:0)', 'PA(16:0/18:1(11Z))', 'PA(16:0/18:1(9Z))', 'PA(16:1(9Z)/18:0)', 'PA(17:0/17:1(9Z))', 'PA(17:1(9Z)/17:0)', 'PA(18:0/16:1(9Z))', 'PA(18:1(9Z)/16:0)', 'PA(19:0/15:1(9Z))', 'PA(19:1(9Z)/15:0)', 'PA(20:0/14:1(9Z))', 'PA(20:1(11Z)/14:0)', 'PA(22:1(11Z)/12:0)']
751.512	10873.9	C37H73O9P	[M+Hac-H]-	751.513	-1.88	['PG(O-16:0/15:1(9Z))', 'PG(P-16:0/15:0)', 'PG(P-18:0/13:0)']
733.551	67081.8	C37H75N2O6P	[M+Hac-H]-	733.55	0.5	['SM(d16:1/16:0)', 'SM(d18:1/14:0)']
733.551	67081.8	C49H76O2	[M+(37Cl)]-	733.551	-0.66	['22:6 Cholesteryl ester']
734.455	12876	C38H70NO8P	[M+Cl]-	734.453	2.1	['PC(12:0/18:3(6Z,9Z,12Z))', 'PC(12:0/18:3(9Z,12Z,15Z))', 'PC(18:3(6Z,9Z,12Z)/12:0)', 'PC(18:3(9Z,12Z,15Z)/12:0)', 'PE(13:0/20:3(8Z,11Z,14Z))', 'PE(15:0/18:3(6Z,9Z,12Z))', 'PE(15:0/18:3(9Z,12Z,15Z))', 'PE(15:1(9Z)/18:2(9Z,12Z))', 'PE(16:1(9Z)/17:2(9Z,12Z))', 'PE(17:2(9Z,12Z)/16:1(9Z))', 'PE(18:2(9Z,12Z)/15:1(9Z))', 'PE(18:3(6Z,9Z,12Z)/15:0)', 'PE(18:3(9Z,12Z,15Z)/15:0)', 'PE(20:3(8Z,11Z,14Z)/13:0…
734.477	1.72858e+06	C41H70NO8P	[M-H]-	734.477	0.41	['PE(14:0/22:6(4Z,7Z,10Z,13Z,16Z,19Z))', 'PE(16:1(9Z)/20:5(5Z,8Z,11Z,14Z,17Z))', 'PE(18:2(9Z,12Z)/18:4(6Z,9Z,12Z,15Z))', 'PE(18:3(6Z,9Z,12Z)/18:3(6Z,9Z,12Z))', 'PE(18:3(6Z,9Z,12Z)/18:3(9Z,12Z,15Z))', 'PE(18:3(9Z,12Z,15Z)/18:3(6Z,9Z,12Z))', 'PE(18:3(9Z,12Z,15Z)/18:3(9Z,12Z,15Z))', 'PE(18:4(6Z,9Z,12Z,15Z)/18:2(9Z,12Z))', 'PE(20:5(5Z,8Z,11Z,14Z,17Z)/16:1(9Z))', 'PE(22:6(4Z,7Z,10Z,13Z,16Z,19Z)/14:0)']
734.493	12347.4	0
734.554	27453.3	0
763.512	605325	C38H73O9P	[M+Hac-H]-	763.513	-1.27	['PG(P-16:0/16:1(9Z))', 'PG(P-18:0/14:1(9Z))']
736.462	5120.45	0
736.478	60879.8	C35H68NO9P	[M+Hac-H]-	736.477	0.78	['PS(P-16:0/13:0)']
736.493	2.51491e+06	C41H72NO8P	[M-H]-	736.492	0.5	['PC(13:0/20:5(5Z,8Z,11Z,14Z,17Z))', 'PC(15:1(9Z)/18:4(6Z,9Z,12Z,15Z))', 'PC(18:4(6Z,9Z,12Z,15Z)/15:1(9Z))', 'PC(20:5(5Z,8Z,11Z,14Z,17Z)/13:0)', 'PE(14:1(9Z)/22:4(7Z,10Z,13Z,16Z))', 'PE(16:0/20:5(5Z,8Z,11Z,14Z,17Z))', 'PE(16:1(9Z)/20:4(5Z,8Z,11Z,14Z))', 'PE(18:1(9Z)/18:4(6Z,9Z,12Z,15Z))', 'PE(18:2(9Z,12Z)/18:3(6Z,9Z,12Z))', 'PE(18:2(9Z,12Z)/18:3(9Z,12Z,15Z))', 'PE(18:3(6Z,9Z,12Z)/18:2(9Z,12Z))', …
736.513	9187.25	C36H72NO8P	[M+Hac-H]-	736.513	-0.29	['PC(10:0/18:0)', 'PC(11:0/17:0)', 'PC(12:0/16:0)', 'PC(13:0/15:0)', 'PC(14:0/14:0)', 'PC(15:0/13:0)', 'PC(16:0/12:0)', 'PC(17:0/11:0)', 'PC(18:0/10:0)', 'PC(19:0/9:0)', 'PC(7:0/21:0)', 'PC(8:0/20:0)', 'PC(9:0/19:0)', 'PE(12:0/19:0)', 'PE(13:0/18:0)', 'PE(14:0/17:0)', 'PE(15:0/16:0)', 'PE(16:0/15:0)', 'PE(17:0/14:0)', 'PE(18:0/13:0)', 'PE(19:0/12:0)']
765.528	623669	C38H75O9P	[M+Hac-H]-	765.529	-1.41	['PG(O-16:0/16:1(9Z))', 'PG(O-18:0/14:1(9Z))', 'PG(P-16:0/16:0)', 'PG(P-18:0/14:0)', 'PG(P-20:0/12:0)']
737.511	9479.61	C42H75O8P	[M-H]-	737.513	-2.47	['PA(17:0/22:4(7Z,10Z,13Z,16Z))', 'PA(17:2(9Z,12Z)/22:2(13Z,16Z))', 'PA(18:4(6Z,9Z,12Z,15Z)/21:0)', 'PA(19:0/20:4(5Z,8Z,11Z,14Z))', 'PA(19:1(9Z)/20:3(8Z,11Z,14Z))', 'PA(20:3(8Z,11Z,14Z)/19:1(9Z))', 'PA(20:4(5Z,8Z,11Z,14Z)/19:0)', 'PA(21:0/18:4(6Z,9Z,12Z,15Z))', 'PA(22:2(13Z,16Z)/17:2(9Z,12Z))', 'PA(22:4(7Z,10Z,13Z,16Z)/17:0)']
737.511	9479.61	C43H74O7	[M+Cl]-	737.513	-2.71	['Ecdysone palmitate']
738.493	119133	C35H70NO9P	[M+Hac-H]-	738.493	0.03	['PS(O-16:0/13:0)']
738.508	4487231	C41H74NO8P	[M-H]-	738.508	-0.3	['PC(13:0/20:4(5Z,8Z,11Z,14Z))', 'PC(15:0/18:4(6Z,9Z,12Z,15Z))', 'PC(15:1(9Z)/18:3(6Z,9Z,12Z))', 'PC(15:1(9Z)/18:3(9Z,12Z,15Z))', 'PC(18:3(6Z,9Z,12Z)/15:1(9Z))', 'PC(18:3(9Z,12Z,15Z)/15:1(9Z))', 'PC(18:4(6Z,9Z,12Z,15Z)/15:0)', 'PC(20:4(5Z,8Z,11Z,14Z)/13:0)', 'PE(14:0/22:4(7Z,10Z,13Z,16Z))', 'PE(16:0/20:4(5Z,8Z,11Z,14Z))', 'PE(16:1(9Z)/20:3(8Z,11Z,14Z))', 'PE(18:0/18:4(6Z,9Z,12Z,15Z))', 'PE(18:1(9…
738.528	18098.9	0
739.49	21516.7	C39H69O7P	[M+Hac-H]-	739.492	-2.21	['PA(O-16:0/20:5(5Z,8Z,11Z,14Z,17Z))', 'PA(P-16:0/20:4(5Z,8Z,11Z,14Z))', 'PA(P-18:0/18:4(6Z,9Z,12Z,15Z))']
739.497	41316.5	0
767.508	21715.2	C37H73O10P	[M+Hac-H]-	767.508	0.52	['PG(12:0/19:0)', 'PG(13:0/18:0)', 'PG(14:0/17:0)', 'PG(15:0/16:0)', 'PG(16:0/15:0)', 'PG(17:0/14:0)', 'PG(18:0/13:0)', 'PG(19:0/12:0)']
739.512	2.03429e+06	C43H74O7	[M+(37Cl)]-	739.51	2.4	['Ecdysone palmitate']
740.492	16457.5	0
740.509	122875	0
740.523	3.42696e+06	C41H76NO8P	[M-H]-	740.524	-0.16	['PC(13:0/20:3(8Z,11Z,14Z))', 'PC(15:0/18:3(6Z,9Z,12Z))', 'PC(15:0/18:3(9Z,12Z,15Z))', 'PC(15:1(9Z)/18:2(9Z,12Z))', 'PC(16:1(9Z)/17:2(9Z,12Z))', 'PC(17:2(9Z,12Z)/16:1(9Z))', 'PC(18:2(9Z,12Z)/15:1(9Z))', 'PC(18:3(6Z,9Z,12Z)/15:0)', 'PC(18:3(9Z,12Z,15Z)/15:0)', 'PC(20:3(8Z,11Z,14Z)/13:0)', 'PE(14:1(9Z)/22:2(13Z,16Z))', 'PE(16:0/20:3(8Z,11Z,14Z))', 'PE(16:1(9Z)/20:2(11Z,14Z))', 'PE(17:2(9Z,12Z)/19:1…
740.545	11841.7	0
740.552	5861.11	0
741.434	22716.1	0
741.472	10298.5	C38H67O8P	[M+Hac-H]-	741.471	0.81	['PA(13:0/22:4(7Z,10Z,13Z,16Z))', 'PA(15:0/20:4(5Z,8Z,11Z,14Z))', 'PA(15:1(9Z)/20:3(8Z,11Z,14Z))', 'PA(17:0/18:4(6Z,9Z,12Z,15Z))', 'PA(17:1(9Z)/18:3(6Z,9Z,12Z))', 'PA(17:1(9Z)/18:3(9Z,12Z,15Z))', 'PA(17:2(9Z,12Z)/18:2(9Z,12Z))', 'PA(18:2(9Z,12Z)/17:2(9Z,12Z))', 'PA(18:3(6Z,9Z,12Z)/17:1(9Z))', 'PA(18:3(9Z,12Z,15Z)/17:1(9Z))', 'PA(18:4(6Z,9Z,12Z,15Z)/17:0)', 'PA(20:3(8Z,11Z,14Z)/15:1(9Z))', 'PA(20:…
767.543	565567	C38H77O9P	[M+Hac-H]-	767.544	-1.44	['Mannosyl-1beta-phosphomycoketide C32', 'PG(O-16:0/16:0)', 'PG(O-18:0/14:0)', 'PG(O-20:0/12:0)']
741.492	8832.37	0
741.511	34415.9	0
741.527	1.61793e+06	0
741.544	12439.2	C42H79O8P	[M-H]-	741.544	-0.58	['PA(17:0/22:2(13Z,16Z))', 'PA(17:1(9Z)/22:1(11Z))', 'PA(17:2(9Z,12Z)/22:0)', 'PA(18:2(9Z,12Z)/21:0)', 'PA(19:0/20:2(11Z,14Z))', 'PA(19:1(9Z)/20:1(11Z))', 'PA(20:1(11Z)/19:1(9Z))', 'PA(20:2(11Z,14Z)/19:0)', 'PA(21:0/18:2(9Z,12Z))', 'PA(22:0/17:2(9Z,12Z))', 'PA(22:1(11Z)/17:1(9Z))', 'PA(22:2(13Z,16Z)/17:0)']
741.544	12439.2	C47H76O4	[M+(37Cl)]-	741.541	3.69	['Cholesteryl 11-hydroperoxy-eicosatetraenoate']
741.592	80546.7	0
742.508	6322.49	0
742.526	132451	0
742.54	1.44226e+06	C39H74NO6P	[M+Hac-H]-	742.539	0.93	['NA']
742.54	1.44226e+06	C41H78NO8P	[M-H]-	742.539	0.93	['PC(13:0/20:2(11Z,14Z))', 'PC(14:1(9Z)/19:1(9Z))', 'PC(15:0/18:2(9Z,12Z))', 'PC(15:1(9Z)/18:1(9Z))', 'PC(16:0/17:2(9Z,12Z))', 'PC(16:1(9Z)/17:1(9Z))', 'PC(17:1(9Z)/16:1(9Z))', 'PC(17:2(9Z,12Z)/16:0)', 'PC(18:1(9Z)/15:1(9Z))', 'PC(18:2(9Z,12Z)/15:0)', 'PC(19:1(9Z)/14:1(9Z))', 'PC(20:2(11Z,14Z)/13:0)', 'PE(14:0/22:2(13Z,16Z))', 'PE(14:1(9Z)/22:1(11Z))', 'PE(16:0/20:2(11Z,14Z))', 'PE(16:1(9Z)/20:1(…
742.556	13654.3	0
742.562	4936.07	0
742.595	37000.9	0
743.487	159547	C38H69O8P	[M+Hac-H]-	743.487	0.78	['PA(15:0/20:3(8Z,11Z,14Z))', 'PA(15:1(9Z)/20:2(11Z,14Z))', 'PA(17:0/18:3(6Z,9Z,12Z))', 'PA(17:0/18:3(9Z,12Z,15Z))', 'PA(17:1(9Z)/18:2(9Z,12Z))', 'PA(17:2(9Z,12Z)/18:1(9Z))', 'PA(18:1(9Z)/17:2(9Z,12Z))', 'PA(18:2(9Z,12Z)/17:1(9Z))', 'PA(18:3(6Z,9Z,12Z)/17:0)', 'PA(18:3(9Z,12Z,15Z)/17:0)', 'PA(20:2(11Z,14Z)/15:1(9Z))', 'PA(20:3(8Z,11Z,14Z)/15:0)']
717.471	74840.6	C38H71O10P	[M-H]-	717.471	-0.17	['PG(12:0/20:2(11Z,14Z))', 'PG(14:0/18:2(9Z,12Z))', 'PG(14:1(9Z)/18:1(9Z))', 'PG(15:0/17:2(9Z,12Z))', 'PG(15:1(9Z)/17:1(9Z))', 'PG(16:1(9Z)/16:1(9Z))', 'PG(17:1(9Z)/15:1(9Z))', 'PG(17:2(9Z,12Z)/15:0)', 'PG(18:1(9Z)/14:1(9Z))', 'PG(18:2(9Z,12Z)/14:0)', 'PG(20:2(11Z,14Z)/12:0)']
743.527	22764.3	0
743.543	693535	0
743.608	220672	C42H85N2O6P	[M-H]-	743.607	0.63	['SM(d18:1/19:0)', 'SM(d19:1/18:0)']
744.491	60413.4	0
744.556	559065	C41H80NO8P	[M-H]-	744.555	1.09	['PC(13:0/20:1(11Z))', 'PC(14:0/19:1(9Z))', 'PC(14:1(9Z)/19:0)', 'PC(15:0/18:1(11Z))', 'PC(15:0/18:1(9Z))', 'PC(15:1(9Z)/18:0)', 'PC(16:0/17:1(9Z))', 'PC(16:1(9Z)/17:0)', 'PC(17:0/16:1(9Z))', 'PC(17:1(9Z)/16:0)', 'PC(18:0/15:1(9Z))', 'PC(18:1(9Z)/15:0)', 'PC(19:0/14:1(9Z))', 'PC(19:1(9Z)/14:0)', 'PC(20:1(11Z)/13:0)', 'PE(14:0/22:1(11Z))', 'PE(14:1(9Z)/22:0)', 'PE(15:1(9Z)/21:0)', 'PE(16:0/20:1(11…
744.611	103010	0
745.503	130120	C38H71O8P	[M+Hac-H]-	745.503	1.12	['PA(13:0/22:2(13Z,16Z))', 'PA(15:0/20:2(11Z,14Z))', 'PA(15:1(9Z)/20:1(11Z))', 'PA(16:1(9Z)/19:1(9Z))', 'PA(17:0/18:2(9Z,12Z))', 'PA(17:1(9Z)/18:1(9Z))', 'PA(17:2(9Z,12Z)/18:0)', 'PA(18:0/17:2(9Z,12Z))', 'PA(18:1(9Z)/17:1(9Z))', 'PA(18:2(9Z,12Z)/17:0)', 'PA(19:1(9Z)/16:1(9Z))', 'PA(20:1(11Z)/15:1(9Z))', 'PA(20:2(11Z,14Z)/15:0)', 'PA(22:2(13Z,16Z)/13:0)']
719.487	62742.7	C38H73O10P	[M-H]-	719.487	-0.17	['PG(12:0/20:1(11Z))', 'PG(13:0/19:1(9Z))', 'PG(14:0/18:1(9Z))', 'PG(14:1(9Z)/18:0)', 'PG(15:0/17:1(9Z))', 'PG(15:1(9Z)/17:0)', 'PG(16:0/16:1(9Z))', 'PG(16:1(9Z)/16:0)', 'PG(17:0/15:1(9Z))', 'PG(17:1(9Z)/15:0)', 'PG(18:0/14:1(9Z))', 'PG(18:1(9Z)/14:0)', 'PG(19:1(9Z)/13:0)', 'PG(20:1(11Z)/12:0)']
745.503	130120	C45H66O5	[M+Hac-H]-	745.505	-2.05	['DG(20:5(5Z,8Z,11Z,14Z,17Z)/22:6(4Z,7Z,10Z,13Z,16Z,19Z)/0:0)']
745.503	130120	C47H70O7	[M-H]-	745.505	-2.05	['1-Hydroxy-4-keto-gamma-carotene glucoside/ 1-OH-4-Keto-gamma-carotene glucoside/ (Carotenoid K-G)']
745.559	261544	0
745.614	22780.2	C43H87O7P	[M-H]-	745.612	3.4	['PA(O-18:0/22:0)', 'PA(O-20:0/20:0)']
746.458	24089.9	0
746.506	45889.1	0
746.561	49114.8	0
746.572	36146.1	C41H82NO8P	[M-H]-	746.571	2.56	['PC(10:0/23:0)', 'PC(11:0/22:0)', 'PC(12:0/21:0)', 'PC(13:0/20:0)', 'PC(14:0/19:0)', 'PC(15:0/18:0)', 'PC(16:0/17:0)', 'PC(17:0/16:0)', 'PC(18:0/15:0)', 'PC(19:0/14:0)', 'PC(20:0/13:0)', 'PC(21:0/12:0)', 'PC(22:0/11:0)', 'PE(14:0/22:0)', 'PE(15:0/21:0)', 'PE(16:0/20:0)', 'PE(17:0/19:0)', 'PE(18:0/18:0)', 'PE(19:0/17:0)', 'PE(20:0/16:0)', 'PE(21:0/15:0)', 'PE(22:0/14:0)']
746.572	36146.1	C42H81NO7	[M+Cl]-	746.571	2.32	['DGTS(16:0/16:0)']
747.461	20889.4	0
747.519	46045.5	C38H73O8P	[M+Hac-H]-	747.518	0.73	['PA(13:0/22:1(11Z))', 'PA(14:1(9Z)/21:0)', 'PA(15:0/20:1(11Z))', 'PA(15:1(9Z)/20:0)', 'PA(16:0/19:1(9Z))', 'PA(16:1(9Z)/19:0)', 'PA(17:0/18:1(9Z))', 'PA(17:1(9Z)/18:0)', 'PA(18:0/17:1(9Z))', 'PA(18:1(9Z)/17:0)', 'PA(19:0/16:1(9Z))', 'PA(19:1(9Z)/16:0)', 'PA(20:0/15:1(9Z))', 'PA(20:1(11Z)/15:0)', 'PA(21:0/14:1(9Z))', 'PA(22:1(11Z)/13:0)']
721.501	52581	C38H75O10P	[M-H]-	721.503	-1.49	['PG(12:0/20:0)', 'PG(13:0/19:0)', 'PG(14:0/18:0)', 'PG(15:0/17:0)', 'PG(16:0/16:0)', 'PG(17:0/15:0)', 'PG(18:0/14:0)', 'PG(19:0/13:0)', 'PG(20:0/12:0)']
747.519	46045.5	C45H68O5	[M+Hac-H]-	747.521	-2.43	['DG(20:4(5Z,8Z,11Z,14Z)/22:6(4Z,7Z,10Z,13Z,16Z,19Z)/0:0)', 'DG(20:5(5Z,8Z,11Z,14Z,17Z)/22:5(7Z,10Z,13Z,16Z,19Z)/0:0)']
747.565	56985.6	C38H77N2O6P	[M+Hac-H]-	747.566	-0.63	['Etn-1-P-Cer(d14:1/18:0)', 'SM(d16:1/17:0)', 'SM(d18:1/15:0)']
748.493	9213.91	C42H72NO8P	[M-H]-	748.492	1.07	['PC(12:0/22:6(4Z,7Z,10Z,13Z,16Z,19Z))', 'PC(14:1(9Z)/20:5(5Z,8Z,11Z,14Z,17Z))', 'PC(20:5(5Z,8Z,11Z,14Z,17Z)/14:1(9Z))', 'PC(22:6(4Z,7Z,10Z,13Z,16Z,19Z)/12:0)', 'PE(15:0/22:6(4Z,7Z,10Z,13Z,16Z,19Z))', 'PE(17:1(9Z)/20:5(5Z,8Z,11Z,14Z,17Z))', 'PE(17:2(9Z,12Z)/20:4(5Z,8Z,11Z,14Z))', 'PE(20:4(5Z,8Z,11Z,14Z)/17:2(9Z,12Z))', 'PE(20:5(5Z,8Z,11Z,14Z,17Z)/17:1(9Z))', 'PE(22:6(4Z,7Z,10Z,13Z,16Z,19Z)/15:0)']
748.569	21824.1	C42H81NO7	[M+(37Cl)]-	748.568	2.12	['DGTS(16:0/16:0)']
749.533	20859.3	C38H75O8P	[M+Hac-H]-	749.534	-0.71	['PA(13:0/22:0)', 'PA(14:0/21:0)', 'PA(15:0/20:0)', 'PA(16:0/19:0)', 'PA(17:0/18:0)', 'PA(18:0/17:0)', 'PA(19:0/16:0)', 'PA(20:0/15:0)', 'PA(21:0/14:0)', 'PA(22:0/13:0)']
787.512	40712.9	C40H73O9P	[M+Hac-H]-	787.513	-1.33	['NA', 'PG(O-16:0/18:4(6Z,9Z,12Z,15Z))', 'PG(P-16:0/18:3(6Z,9Z,12Z))', 'PG(P-16:0/18:3(9Z,12Z,15Z))']
749.533	20859.3	C45H70O5	[M+Hac-H]-	749.536	-3.87	['DG(20:3(8Z,11Z,14Z)/22:6(4Z,7Z,10Z,13Z,16Z,19Z)/0:0)', 'DG(20:4(5Z,8Z,11Z,14Z)/22:5(7Z,10Z,13Z,16Z,19Z)/0:0)', 'DG(20:5(5Z,8Z,11Z,14Z,17Z)/22:4(7Z,10Z,13Z,16Z)/0:0)']
750.509	28865.2	C42H74NO8P	[M-H]-	750.508	0.81	['PC(14:0/20:5(5Z,8Z,11Z,14Z,17Z))', 'PC(14:1(9Z)/20:4(5Z,8Z,11Z,14Z))', 'PC(16:1(9Z)/18:4(6Z,9Z,12Z,15Z))', 'PC(18:4(6Z,9Z,12Z,15Z)/16:1(9Z))', 'PC(20:4(5Z,8Z,11Z,14Z)/14:1(9Z))', 'PC(20:5(5Z,8Z,11Z,14Z,17Z)/14:0)', 'PE(15:1(9Z)/22:4(7Z,10Z,13Z,16Z))', 'PE(17:0/20:5(5Z,8Z,11Z,14Z,17Z))', 'PE(17:1(9Z)/20:4(5Z,8Z,11Z,14Z))', 'PE(17:2(9Z,12Z)/20:3(8Z,11Z,14Z))', 'PE(18:4(6Z,9Z,12Z,15Z)/19:1(9Z))', …
750.545	41797.9	C43H78NO7P	[M-H]-	750.544	1.28	['PE(O-16:0/22:5(4Z,7Z,10Z,13Z,16Z))', 'PE(O-16:0/22:5(7Z,10Z,13Z,16Z,19Z))', 'PE(O-18:0/20:5(5Z,8Z,11Z,14Z,17Z))', 'PE(O-18:1(1Z)/20:4(5Z,8Z,11Z,14Z))', 'PE(P-16:0/22:4(7Z,10Z,13Z,16Z))', 'PE(P-20:0/18:4(6Z,9Z,12Z,15Z))']
789.528	43098.1	C40H75O9P	[M+Hac-H]-	789.529	-1.19	['PG(O-16:0/18:3(6Z,9Z,12Z))', 'PG(O-16:0/18:3(9Z,12Z,15Z))', 'PG(P-16:0/18:2(9Z,12Z))']
751.548	13590.2	C45H78O6	[M+(37Cl)]-	751.546	2.58	['TG(12:0/12:0/18:4(6Z,9Z,12Z,15Z))[iso3]']
752.524	105349	C42H76NO8P	[M-H]-	752.524	1.09	['PC(12:0/22:4(7Z,10Z,13Z,16Z))', 'PC(14:0/20:4(5Z,8Z,11Z,14Z))', 'PC(14:1(9Z)/20:3(8Z,11Z,14Z))', 'PC(16:0/18:4(6Z,9Z,12Z,15Z))', 'PC(16:0/18:4(9E,11E,13E,15E))', 'PC(16:0/18:4(9Z,11E,13E,15Z))', 'PC(16:0/18:4(9Z,11Z,13Z,15Z))', 'PC(16:1(9Z)/18:3(6Z,9Z,12Z))', 'PC(16:1(9Z)/18:3(9Z,12Z,15Z))', 'PC(16:2(2E,4E)/18:2(2E,4E))', 'PC(17:2(9Z,12Z)/17:2(9Z,12Z))', 'PC(18:3(6Z,9Z,12Z)/16:1(9Z))', 'PC(18:3…
752.561	52953.9	C43H80NO7P	[M-H]-	752.56	1.16	['PC(O-15:0/20:4(5Z,8Z,11Z,14Z))', 'PE(O-16:0/22:4(7Z,10Z,13Z,16Z))', 'PE(O-18:0/20:4(5Z,8Z,11Z,14Z))', 'PE(O-20:0/18:4(6Z,9Z,12Z,15Z))', 'PE(P-18:0/20:3(8Z,11Z,14Z))', 'PE(P-20:0/18:3(6Z,9Z,12Z))', 'PE(P-20:0/18:3(9Z,12Z,15Z))']
753.564	24602.2	C45H80O6	[M+(37Cl)]-	753.562	2.52	['TG(12:0/12:0/18:3(6Z,9Z,12Z))[iso3]', 'TG(12:0/12:0/18:3(9Z,12Z,15Z))[iso3]', 'TG(14:1(9Z)/14:1(9Z)/14:1(9Z))']
754.503	21557.3	C39H70NO7P	[M+Hac-H]-	754.503	0.59	['PE(P-16:0/18:4(6Z,9Z,12Z,15Z))']
754.54	144498	C42H78NO8P	[M-H]-	754.539	0.57	['PC(14:0/20:3(8Z,11Z,14Z))', 'PC(14:1(9Z)/20:2(11Z,14Z))', 'PC(16:0/18:3(6Z,9Z,12Z))', 'PC(16:0/18:3(9Z,12Z,15Z))', 'PC(16:1(9Z)/18:2(9Z,12Z))', 'PC(17:1(9Z)/17:2(9Z,12Z))', 'PC(17:2(9Z,12Z)/17:1(9Z))', 'PC(18:2(9Z,12Z)/16:1(9Z))', 'PC(18:3(6Z,9Z,12Z)/16:0)', 'PC(18:3(9Z,12Z,15Z)/16:0)', 'PC(20:2(11Z,14Z)/14:1(9Z))', 'PC(20:3(8Z,11Z,14Z)/14:0)', 'PE(15:1(9Z)/22:2(13Z,16Z))', 'PE(17:0/20:3(8Z,11Z…
754.576	24274.8	C43H82NO7P	[M-H]-	754.576	1.09	['PC(P-18:0/17:2(9Z,12Z))', 'PE(O-18:0/20:3(8Z,11Z,14Z))', 'PE(O-20:0/18:3(6Z,9Z,12Z))', 'PE(O-20:0/18:3(9Z,12Z,15Z))', 'PE(P-16:0/22:2(13Z,16Z))', 'PE(P-18:0/20:2(11Z,14Z))', 'PE(P-20:0/18:2(9Z,12Z))']
755.543	65204.3	0
756.482	53257.7	C38H68NO8P	[M+Hac-H]-	756.482	0.49	['PC(12:0/18:4(6Z,9Z,12Z,15Z))', 'PC(18:4(6Z,9Z,12Z,15Z)/12:0)', 'PE(13:0/20:4(5Z,8Z,11Z,14Z))', 'PE(15:0/18:4(6Z,9Z,12Z,15Z))', 'PE(15:1(9Z)/18:3(6Z,9Z,12Z))', 'PE(15:1(9Z)/18:3(9Z,12Z,15Z))', 'PE(18:3(6Z,9Z,12Z)/15:1(9Z))', 'PE(18:3(9Z,12Z,15Z)/15:1(9Z))', 'PE(18:4(6Z,9Z,12Z,15Z)/15:0)', 'PE(20:4(5Z,8Z,11Z,14Z)/13:0)']
756.482	53257.7	C40H72NO10P	[M-H]-	756.482	0.49	['PS(14:0/20:3(8Z,11Z,14Z))', 'PS(14:1(9Z)/20:2(11Z,14Z))', 'PS(16:0/18:3(6Z,9Z,12Z))', 'PS(16:0/18:3(9Z,12Z,15Z))', 'PS(16:1(9Z)/18:2(9Z,12Z))', 'PS(17:1(9Z)/17:2(9Z,12Z))', 'PS(17:2(9Z,12Z)/17:1(9Z))', 'PS(18:2(9Z,12Z)/16:1(9Z))', 'PS(18:3(6Z,9Z,12Z)/16:0)', 'PS(18:3(9Z,12Z,15Z)/16:0)', 'PS(20:2(11Z,14Z)/14:1(9Z))', 'PS(20:3(8Z,11Z,14Z)/14:0)']
756.519	20442.2	C39H72NO7P	[M+Hac-H]-	756.518	0.89	['NA', 'PE(O-16:0/18:4(6Z,9Z,12Z,15Z))', 'PE(P-16:0/18:3(6Z,9Z,12Z))', 'PE(P-16:0/18:3(9Z,12Z,15Z))']
756.519	20442.2	C41H76NO9P	[M-H]-	756.518	0.89	['PS(P-18:0/17:2(9Z,12Z))']
756.556	56306	C42H80NO8P	[M-H]-	756.555	1.6	['PC(12:0/22:2(13Z,16Z))', 'PC(14:0/20:2(11Z,14Z))', 'PC(14:1(9Z)/20:1(11Z))', 'PC(15:1(9Z)/19:1(9Z))', 'PC(16:0/18:2(10E,12Z))', 'PC(16:0/18:2(11Z,13Z))', 'PC(16:0/18:2(2E,4E))', 'PC(16:0/18:2(2Z,4Z))', 'PC(16:0/18:2(6Z,9Z))', 'PC(16:0/18:2(9E,11E))', 'PC(16:0/18:2(9E,11Z))', 'PC(16:0/18:2(9E,12E))', 'PC(16:0/18:2(9Z,12Z))', 'PC(16:1(2Z)/18:1(9Z))', 'PC(16:1(9Z)/18:1(11Z))', 'PC(16:1(9Z)/18:1(9Z…
756.592	18823	C43H84NO7P	[M-H]-	756.591	1.3	['PC(O-18:0/17:2(9Z,12Z))', 'PC(P-16:0/19:1(9Z))', 'PC(P-18:0/17:1(9Z))', 'PC(P-20:0/15:1(9Z))', 'PE(O-16:0/22:2(13Z,16Z))', 'PE(O-18:0/20:2(11Z,14Z))', 'PE(O-20:0/18:2(9Z,12Z))', 'PE(P-16:0/22:1(11Z))', 'PE(P-18:0/20:1(11Z))', 'PE(P-20:0/18:1(9Z))']
757.486	23481.1	0
757.559	24889	0
757.624	16421.8	C43H87N2O6P	[M-H]-	757.623	0.9	['SM(d16:1/22:0)', 'SM(d18:1/20:0)']
758.477	143023	C43H70NO8P	[M-H]-	758.477	0.99	['PE(18:3(6Z,9Z,12Z)/20:5(5Z,8Z,11Z,14Z,17Z))', 'PE(18:3(9Z,12Z,15Z)/20:5(5Z,8Z,11Z,14Z,17Z))', 'PE(18:4(6Z,9Z,12Z,15Z)/20:4(5Z,8Z,11Z,14Z))', 'PE(20:4(5Z,8Z,11Z,14Z)/18:4(6Z,9Z,12Z,15Z))', 'PE(20:5(5Z,8Z,11Z,14Z,17Z)/18:3(6Z,9Z,12Z))', 'PE(20:5(5Z,8Z,11Z,14Z,17Z)/18:3(9Z,12Z,15Z))']
758.572	22825.5	C42H82NO8P	[M-H]-	758.571	1.5	['PC(12:0/22:1(11Z))', 'PC(14:0/20:1(11Z))', 'PC(14:1(9Z)/20:0)', 'PC(15:0/19:1(9Z))', 'PC(15:1(9Z)/19:0)', 'PC(16:0/18:1(11E))', 'PC(16:0/18:1(11Z))', 'PC(16:0/18:1(6E))', 'PC(16:0/18:1(6Z))', 'PC(16:0/18:1(9E))', 'PC(16:0/18:1(9Z))', 'PC(16:1(9Z)/18:0)', 'PC(17:0/17:1(9Z))', 'PC(17:1(9Z)/17:0)', 'PC(18:0/16:1(9Z))', 'PC(18:1(9Z)/16:0)', 'PC(19:0/15:1(9Z))', 'PC(19:1(9Z)/15:0)', 'PC(20:0/14:1(9Z…
758.608	18739.9	C43H86NO7P	[M-H]-	758.607	1.18	['PC(O-16:0/19:1(9Z))', 'PC(O-17:0/18:1(9Z))', 'PC(O-18:0/17:1(9Z))', 'PC(O-20:0/15:1(9Z))', 'PC(P-16:0/19:0)', 'PC(P-18:0/17:0)', 'PC(P-20:0/15:0)', 'PE(O-16:0/22:1(11Z))', 'PE(O-18:0/20:1(11Z))', 'PE(O-20:0/18:1(9Z))', 'PE(P-16:0/22:0)', 'PE(P-18:0/20:0)', 'PE(P-20:0/18:0)']
759.481	66327.9	0
760.493	213543	C41H73NO9	[M+(37Cl)]-	760.495	-2.33	['bacteriohopane-31,32,33,34-tetrol-35-cyclitol']
760.493	213543	C43H72NO8P	[M-H]-	760.492	1.22	['PE(16:1(9Z)/22:6(4Z,7Z,10Z,13Z,16Z,19Z))', 'PE(18:2(9Z,12Z)/20:5(5Z,8Z,11Z,14Z,17Z))', 'PE(18:3(6Z,9Z,12Z)/20:4(5Z,8Z,11Z,14Z))', 'PE(18:3(9Z,12Z,15Z)/20:4(5Z,8Z,11Z,14Z))', 'PE(18:4(6Z,9Z,12Z,15Z)/20:3(8Z,11Z,14Z))', 'PE(20:3(8Z,11Z,14Z)/18:4(6Z,9Z,12Z,15Z))', 'PE(20:4(5Z,8Z,11Z,14Z)/18:3(6Z,9Z,12Z))', 'PE(20:4(5Z,8Z,11Z,14Z)/18:3(9Z,12Z,15Z))', 'PE(20:5(5Z,8Z,11Z,14Z,17Z)/18:2(9Z,12Z))', 'PE(…
760.511	11881.7	C38H72NO8P	[M+Hac-H]-	760.513	-2.76	['PC(12:0/18:2(9Z,12Z))', 'PC(13:0/17:2(9Z,12Z))', 'PC(14:1(9Z)/16:1(9Z))', 'PC(15:1(9Z)/15:1(9Z))', 'PC(16:1(9Z)/14:1(9Z))', 'PC(17:2(9Z,12Z)/13:0)', 'PC(18:2(9Z,12Z)/12:0)', 'PE(13:0/20:2(11Z,14Z))', 'PE(14:1(9Z)/19:1(9Z))', 'PE(15:0/18:2(9Z,12Z))', 'PE(15:1(9Z)/18:1(9Z))', 'PE(16:0/17:2(9Z,12Z))', 'PE(16:1(9Z)/17:1(9Z))', 'PE(17:1(9Z)/16:1(9Z))', 'PE(17:2(9Z,12Z)/16:0)', 'PE(18:1(9Z)/15:1(9Z))…
760.511	11881.7	C40H76NO10P	[M-H]-	760.513	-2.76	['PS(12:0/22:1(11Z))', 'PS(14:0/20:1(11Z))', 'PS(14:1(9Z)/20:0)', 'PS(15:0/19:1(9Z))', 'PS(15:1(9Z)/19:0)', 'PS(16:0/18:1(11Z))', 'PS(16:0/18:1(9Z))', 'PS(16:1(9Z)/18:0)', 'PS(17:0/17:1(9Z))', 'PS(17:1(9Z)/17:0)', 'PS(18:0/16:1(9Z))', 'PS(18:1(9Z)/16:0)', 'PS(19:0/15:1(9Z))', 'PS(19:1(9Z)/15:0)', 'PS(20:0/14:1(9Z))', 'PS(20:1(11Z)/14:0)', 'PS(22:1(11Z)/12:0)']
760.511	11881.7	C41H75NO9	[M+Cl]-	760.514	-2.99	['Phalluside-1']
761.496	100794	0
761.582	192689	C39H79N2O6P	[M+Hac-H]-	761.581	0.76	['SM(d16:1/18:0)', 'SM(d17:1/17:0)', 'SM(d18:1/16:0)']
762.508	1.30957e+06	C41H75NO9	[M+(37Cl)]-	762.511	-3.01	['Phalluside-1']
762.508	1.30957e+06	C43H74NO8P	[M-H]-	762.508	0.54	['PC(13:0/22:6(4Z,7Z,10Z,13Z,16Z,19Z))', 'PC(15:1(9Z)/20:5(5Z,8Z,11Z,14Z,17Z))', 'PC(17:2(9Z,12Z)/18:4(6Z,9Z,12Z,15Z))', 'PC(18:4(6Z,9Z,12Z,15Z)/17:2(9Z,12Z))', 'PC(20:5(5Z,8Z,11Z,14Z,17Z)/15:1(9Z))', 'PC(22:6(4Z,7Z,10Z,13Z,16Z,19Z)/13:0)', 'PE(16:0/22:6(4Z,7Z,10Z,13Z,16Z,19Z))', 'PE(18:1(9Z)/20:5(5Z,8Z,11Z,14Z,17Z))', 'PE(18:2(9Z,12Z)/20:4(5Z,8Z,11Z,14Z))', 'PE(18:3(6Z,9Z,12Z)/20:3(8Z,11Z,14Z))'…
762.585	83078.2	0
763.489	7809.85	C41H69O7P	[M+Hac-H]-	763.492	-3.72	['PA(P-16:0/22:6(4Z,7Z,10Z,13Z,16Z,19Z))']
763.489	7809.85	C41H75O8P	[M+(37Cl)]-	763.486	3.54	['PA(16:1(9Z)/22:2(13Z,16Z))', 'PA(18:0/20:3(8Z,11Z,14Z))', 'PA(18:1(9Z)/20:2(11Z,14Z))', 'PA(18:2(9Z,12Z)/20:1(11Z))', 'PA(18:3(6Z,9Z,12Z)/20:0)', 'PA(18:3(9Z,12Z,15Z)/20:0)', 'PA(20:0/18:3(6Z,9Z,12Z))', 'PA(20:0/18:3(9Z,12Z,15Z))', 'PA(20:1(11Z)/18:2(9Z,12Z))', 'PA(20:2(11Z,14Z)/18:1(9Z))', 'PA(20:3(8Z,11Z,14Z)/18:0)', 'PA(22:2(13Z,16Z)/16:1(9Z))']
791.544	71407.8	C40H77O9P	[M+Hac-H]-	791.544	-1.09	['PG(O-16:0/18:2(9Z,12Z))', 'PG(P-16:0/18:1(9Z))', 'PG(P-18:0/16:1(9Z))', 'PG(P-20:0/14:1(9Z))']
763.588	16113.1	C40H81O7P	[M+Hac-H]-	763.586	2.45	['PA(O-16:0/21:0)', 'PA(O-18:0/19:0)', 'PA(O-20:0/17:0)']
763.588	16113.1	C42H85O9P	[M-H]-	763.586	2.45	['PG(O-16:0/20:0)', 'PG(O-18:0/18:0)', 'PG(O-20:0/16:0)']
763.588	16113.1	C47H76O4	[M+Hac-H]-	763.588	-0.65	['Cholesteryl 11-hydroperoxy-eicosatetraenoate']
764.489	64582	C42H72NO9P	[M-H]-	764.487	2.71	['PS(P-16:0/20:5(5Z,8Z,11Z,14Z,17Z))']
764.508	39828	C37H72NO9P	[M+Hac-H]-	764.508	-0.73	['PS(O-16:0/15:1(9Z))', 'PS(P-16:0/15:0)', 'PS(P-18:0/13:0)']
764.524	1.31316e+06	C43H76NO8P	[M-H]-	764.524	0.77	['PC(15:0/20:5(5Z,8Z,11Z,14Z,17Z))', 'PC(15:1(9Z)/20:4(5Z,8Z,11Z,14Z))', 'PC(17:1(9Z)/18:4(6Z,9Z,12Z,15Z))', 'PC(17:2(9Z,12Z)/18:3(6Z,9Z,12Z))', 'PC(17:2(9Z,12Z)/18:3(9Z,12Z,15Z))', 'PC(18:3(6Z,9Z,12Z)/17:2(9Z,12Z))', 'PC(18:3(9Z,12Z,15Z)/17:2(9Z,12Z))', 'PC(18:4(6Z,9Z,12Z,15Z)/17:1(9Z))', 'PC(20:4(5Z,8Z,11Z,14Z)/15:1(9Z))', 'PC(20:5(5Z,8Z,11Z,14Z,17Z)/15:0)', 'PE(16:1(9Z)/22:4(7Z,10Z,13Z,16Z))',…
764.553	4683.13	C42H82NO6P	[M+(37Cl)]-	764.554	-1.28	['CerP(d18:1/24:1(15Z))']
765.472	53074.3	C40H67O8P	[M+Hac-H]-	765.471	1.47	['PA(15:0/22:6(4Z,7Z,10Z,13Z,16Z,19Z))', 'PA(17:1(9Z)/20:5(5Z,8Z,11Z,14Z,17Z))', 'PA(17:2(9Z,12Z)/20:4(5Z,8Z,11Z,14Z))', 'PA(20:4(5Z,8Z,11Z,14Z)/17:2(9Z,12Z))', 'PA(20:5(5Z,8Z,11Z,14Z,17Z)/17:1(9Z))', 'PA(22:6(4Z,7Z,10Z,13Z,16Z,19Z)/15:0)']
733.503	8708.66	C39H75O10P	[M-H]-	733.503	0.41	['PG(13:0/20:1(11Z))', 'PG(14:0/19:1(9Z))', 'PG(14:1(9Z)/19:0)', 'PG(15:0/18:1(9Z))', 'PG(15:1(9Z)/18:0)', 'PG(16:0/17:1(9Z))', 'PG(16:1(9Z)/17:0)', 'PG(17:0/16:1(9Z))', 'PG(17:1(9Z)/16:0)', 'PG(18:0/15:1(9Z))', 'PG(18:1(9Z)/15:0)', 'PG(19:0/14:1(9Z))', 'PG(19:1(9Z)/14:0)', 'PG(20:1(11Z)/13:0)']
793.559	58135	C40H79O9P	[M+Hac-H]-	793.56	-1.42	['PG(O-16:0/18:1(9Z))', 'PG(O-18:0/16:1(9Z))', 'PG(O-20:0/14:1(9Z))', 'PG(P-16:0/18:0)', 'PG(P-18:0/16:0)', 'PG(P-20:0/14:0)']
765.592	15854.7	0
766.477	21786	C39H74NO9P	[M+Cl]-	766.48	-3.48	['PS(O-16:0/17:2(9Z,12Z))', 'PS(P-16:0/17:1(9Z))', 'PS(P-18:0/15:1(9Z))']
766.477	21786	C43H72NO6P	[M+(37Cl)]-	766.476	0.89	['NA']
766.506	45405.3	C42H74NO9P	[M-H]-	766.503	3.98	['PS(O-16:0/20:5(5Z,8Z,11Z,14Z,17Z))', 'PS(P-16:0/20:4(5Z,8Z,11Z,14Z))', 'PS(P-18:0/18:4(6Z,9Z,12Z,15Z))']
766.54	1.17528e+06	C43H78NO8P	[M-H]-	766.539	1.02	['PC(13:0/22:4(7Z,10Z,13Z,16Z))', 'PC(15:0/20:4(5Z,8Z,11Z,14Z))', 'PC(15:1(9Z)/20:3(8Z,11Z,14Z))', 'PC(17:0/18:4(6Z,9Z,12Z,15Z))', 'PC(17:1(9Z)/18:3(6Z,9Z,12Z))', 'PC(17:1(9Z)/18:3(9Z,12Z,15Z))', 'PC(17:2(9Z,12Z)/18:2(9Z,12Z))', 'PC(18:2(9Z,12E)/17:2(9Z,11E))', 'PC(18:2(9Z,12Z)/17:2(9Z,12Z))', 'PC(18:3(6Z,9Z,12Z)/17:1(9Z))', 'PC(18:3(9Z,12Z,15Z)/17:1(9Z))', 'PC(18:4(6Z,9Z,12Z,15Z)/17:0)', 'PC(20:…
767.488	32065.9	C37H73O8PS	[M+Hac-H]-	767.49	-2.44	['NA']
767.488	32065.9	C40H69O8P	[M+Hac-H]-	767.487	1.95	['PA(15:1(9Z)/22:4(7Z,10Z,13Z,16Z))', 'PA(17:0/20:5(5Z,8Z,11Z,14Z,17Z))', 'PA(17:1(9Z)/20:4(5Z,8Z,11Z,14Z))', 'PA(17:2(9Z,12Z)/20:3(8Z,11Z,14Z))', 'PA(18:4(6Z,9Z,12Z,15Z)/19:1(9Z))', 'PA(19:1(9Z)/18:4(6Z,9Z,12Z,15Z))', 'PA(20:3(8Z,11Z,14Z)/17:2(9Z,12Z))', 'PA(20:4(5Z,8Z,11Z,14Z)/17:1(9Z))', 'PA(20:5(5Z,8Z,11Z,14Z,17Z)/17:0)', 'PA(22:4(7Z,10Z,13Z,16Z)/15:1(9Z))']
741.472	10298.5	C40H71O10P	[M-H]-	741.471	0.81	['PG(12:0/22:4(7Z,10Z,13Z,16Z))', 'PG(14:0/20:4(5Z,8Z,11Z,14Z))', 'PG(14:1(9Z)/20:3(8Z,11Z,14Z))', 'PG(16:0/18:4(6Z,9Z,12Z,15Z))', 'PG(16:1(9Z)/18:3(6Z,9Z,12Z))', 'PG(16:1(9Z)/18:3(9Z,12Z,15Z))', 'PG(17:2(9Z,12Z)/17:2(9Z,12Z))', 'PG(18:3(6Z,9Z,12Z)/16:1(9Z))', 'PG(18:3(9Z,12Z,15Z)/16:1(9Z))', 'PG(18:4(6Z,9Z,12Z,15Z)/16:0)', 'PG(20:3(8Z,11Z,14Z)/14:1(9Z))', 'PG(20:4(5Z,8Z,11Z,14Z)/14:0)', 'PG(22:4…
743.487	159547	C40H73O10P	[M-H]-	743.487	0.78	['PG(14:0/20:3(8Z,11Z,14Z))', 'PG(14:1(9Z)/20:2(11Z,14Z))', 'PG(16:0/18:3(6Z,9Z,12Z))', 'PG(16:0/18:3(9Z,12Z,15Z))', 'PG(16:1(9Z)/18:2(9Z,12Z))', 'PG(17:1(9Z)/17:2(9Z,12Z))', 'PG(17:2(9Z,12Z)/17:1(9Z))', 'PG(18:2(9Z,12Z)/16:1(9Z))', 'PG(18:3(6Z,9Z,12Z)/16:0)', 'PG(18:3(9Z,12Z,15Z)/16:0)', 'PG(20:2(11Z,14Z)/14:1(9Z))', 'PG(20:3(8Z,11Z,14Z)/14:0)']
767.508	21715.2	C39H77O12P	[M-H]-	767.508	0.52	['PI(O-16:0/14:0)', 'PI(O-18:0/12:0)']
745.503	130120	C40H75O10P	[M-H]-	745.503	1.12	['LBPA(16:1(9Z)/18:1(9Z))', 'PG(12:0/22:2(13Z,16Z))', 'PG(14:0/20:2(11Z,14Z))', 'PG(14:1(9Z)/20:1(11Z))', 'PG(15:1(9Z)/19:1(9Z))', 'PG(16:0/18:2(9Z,12Z))', 'PG(16:1(9Z)/18:1(9Z))', 'PG(17:0/17:2(9Z,12Z))', 'PG(17:1(9Z)/17:1(9Z))', 'PG(17:2(9Z,12Z)/17:0)', 'PG(18:1(9Z)/16:1(9Z))', 'PG(18:2(9Z,12Z)/16:0)', 'PG(19:1(9Z)/15:1(9Z))', 'PG(20:1(11Z)/14:1(9Z))', 'PG(20:2(11Z,14Z)/14:0)', 'PG(22:2(13Z,16Z…
768.48	12107	C39H68NO8P	[M+Hac-H]-	768.482	-2.16	['PE(14:0/20:5(5Z,8Z,11Z,14Z,17Z))', 'PE(14:1(9Z)/20:4(5Z,8Z,11Z,14Z))', 'PE(16:1(9Z)/18:4(6Z,9Z,12Z,15Z))', 'PE(18:4(6Z,9Z,12Z,15Z)/16:1(9Z))', 'PE(20:4(5Z,8Z,11Z,14Z)/14:1(9Z))', 'PE(20:5(5Z,8Z,11Z,14Z,17Z)/14:0)']
768.48	12107	C41H72NO10P	[M-H]-	768.482	-2.16	['PS(13:0/22:4(7Z,10Z,13Z,16Z))', 'PS(15:0/20:4(5Z,8Z,11Z,14Z))', 'PS(15:1(9Z)/20:3(8Z,11Z,14Z))', 'PS(17:0/18:4(6Z,9Z,12Z,15Z))', 'PS(17:1(9Z)/18:3(6Z,9Z,12Z))', 'PS(17:1(9Z)/18:3(9Z,12Z,15Z))', 'PS(17:2(9Z,12Z)/18:2(9Z,12Z))', 'PS(18:2(9Z,12Z)/17:2(9Z,12Z))', 'PS(18:3(6Z,9Z,12Z)/17:1(9Z))', 'PS(18:3(9Z,12Z,15Z)/17:1(9Z))', 'PS(18:4(6Z,9Z,12Z,15Z)/17:0)', 'PS(20:3(8Z,11Z,14Z)/15:1(9Z))', 'PS(20:…
768.493	9210.93	C39H76NO9P	[M+Cl]-	768.495	-2.42	['PS(O-16:0/17:1(9Z))', 'PS(O-18:0/15:1(9Z))', 'PS(P-16:0/17:0)', 'PS(P-18:0/15:0)', 'PS(P-20:0/13:0)']
768.493	9210.93	C43H74NO6P	[M+(37Cl)]-	768.492	1.93	['NA']
768.556	833910	C43H80NO8P	[M-H]-	768.555	1.08	['PC(15:0/20:3(8Z,11Z,14Z))', 'PC(15:1(9Z)/20:2(11Z,14Z))', 'PC(17:0/18:3(6Z,9Z,12Z))', 'PC(17:0/18:3(9Z,12Z,15Z))', 'PC(17:1(9Z)/18:2(9Z,12Z))', 'PC(17:2(9Z,12Z)/18:1(9Z))', 'PC(18:1(9Z)/17:2(9Z,12Z))', 'PC(18:2(9Z,12Z)/17:1(9Z))', 'PC(18:3(6Z,9Z,12Z)/17:0)', 'PC(18:3(9Z,12Z,15Z)/17:0)', 'PC(20:2(11Z,14Z)/15:1(9Z))', 'PC(20:3(8Z,11Z,14Z)/15:0)', 'PE(16:1(9Z)/22:2(13Z,16Z))', 'PE(18:0/20:3(8Z,11Z…
768.573	7620.31	0
769.504	36134.5	C40H71O8P	[M+Hac-H]-	769.503	1.71	['PA(15:0/22:4(7Z,10Z,13Z,16Z))', 'PA(17:0/20:4(5Z,8Z,11Z,14Z))', 'PA(17:1(9Z)/20:3(8Z,11Z,14Z))', 'PA(17:2(9Z,12Z)/20:2(11Z,14Z))', 'PA(18:3(6Z,9Z,12Z)/19:1(9Z))', 'PA(18:3(9Z,12Z,15Z)/19:1(9Z))', 'PA(18:4(6Z,9Z,12Z,15Z)/19:0)', 'PA(19:0/18:4(6Z,9Z,12Z,15Z))', 'PA(19:1(9Z)/18:3(6Z,9Z,12Z))', 'PA(19:1(9Z)/18:3(9Z,12Z,15Z))', 'PA(20:2(11Z,14Z)/17:2(9Z,12Z))', 'PA(20:3(8Z,11Z,14Z)/17:1(9Z))', 'PA(2…
747.519	46045.5	C40H77O10P	[M-H]-	747.518	0.73	['LBPA(16:0/18:1(9Z))', 'PG(12:0/22:1(11Z))', 'PG(14:0/20:1(11Z))', 'PG(14:1(9Z)/20:0)', 'PG(15:0/19:1(9Z))', 'PG(15:1(9Z)/19:0)', 'PG(16:0/18:1(11Z))', 'PG(16:0/18:1(9Z))', 'PG(16:1(9Z)/18:0)', 'PG(17:0/17:1(9Z))', 'PG(17:1(9Z)/17:0)', 'PG(18:0/16:1(9Z))', 'PG(18:1(9Z)/16:0)', 'PG(19:0/15:1(9Z))', 'PG(19:1(9Z)/15:0)', 'PG(20:0/14:1(9Z))', 'PG(20:1(11Z)/14:0)', 'PG(22:1(11Z)/12:0)']
769.524	19013.3	0
769.559	407171	0
769.624	72014.2	C44H87N2O6P	[M-H]-	769.623	0.85	['SM(d18:2/21:0)']
770.497	20770.9	C39H70NO8P	[M+Hac-H]-	770.498	-1.49	['PC(13:0/18:4(6Z,9Z,12Z,15Z))', 'PC(18:4(6Z,9Z,12Z,15Z)/13:0)', 'PE(12:0/22:4(7Z,10Z,13Z,16Z))', 'PE(14:0/20:4(5Z,8Z,11Z,14Z))', 'PE(14:1(9Z)/20:3(8Z,11Z,14Z))', 'PE(16:0/18:4(6Z,9Z,12Z,15Z))', 'PE(16:1(9Z)/18:3(6Z,9Z,12Z))', 'PE(16:1(9Z)/18:3(9Z,12Z,15Z))', 'PE(17:2(9Z,12Z)/17:2(9Z,12Z))', 'PE(18:3(6Z,9Z,12Z)/16:1(9Z))', 'PE(18:3(9Z,12Z,15Z)/16:1(9Z))', 'PE(18:4(6Z,9Z,12Z,15Z)/16:0)', 'PE(20:3(…
770.497	20770.9	C41H74NO10P	[M-H]-	770.498	-1.49	['PS(15:0/20:3(8Z,11Z,14Z))', 'PS(15:1(9Z)/20:2(11Z,14Z))', 'PS(17:0/18:3(6Z,9Z,12Z))', 'PS(17:0/18:3(9Z,12Z,15Z))', 'PS(17:1(9Z)/18:2(9Z,12Z))', 'PS(17:2(9Z,12Z)/18:1(9Z))', 'PS(18:1(9Z)/17:2(9Z,12Z))', 'PS(18:2(9Z,12Z)/17:1(9Z))', 'PS(18:3(6Z,9Z,12Z)/17:0)', 'PS(18:3(9Z,12Z,15Z)/17:0)', 'PS(20:2(11Z,14Z)/15:1(9Z))', 'PS(20:3(8Z,11Z,14Z)/15:0)']
770.536	26291.9	C42H78NO9P	[M-H]-	770.534	2.96	['PS(O-16:0/20:3(8Z,11Z,14Z))', 'PS(O-18:0/18:3(6Z,9Z,12Z))', 'PS(O-18:0/18:3(9Z,12Z,15Z))', 'PS(P-16:0/20:2(11Z,14Z))', 'PS(P-18:0/18:2(9Z,12Z))']
770.572	231838	C43H82NO8P	[M-H]-	770.571	2.22	['PC(13:0/22:2(13Z,16Z))', 'PC(15:0/20:2(11Z,14Z))', 'PC(15:1(9Z)/20:1(11Z))', 'PC(16:1(9Z)/19:1(9Z))', 'PC(17:0/18:2(9Z,12Z))', 'PC(17:1(9Z)/18:1(9Z))', 'PC(17:2(9Z,12Z)/18:0)', 'PC(18:0/17:2(9Z,12Z))', 'PC(18:1(9Z)/17:1(9Z))', 'PC(18:2(9Z,12Z)/17:0)', 'PC(19:1(9Z)/16:1(9Z))', 'PC(20:1(11Z)/15:1(9Z))', 'PC(20:2(11Z,14Z)/15:0)', 'PC(22:2(13Z,16Z)/13:0)', 'PE(16:0/22:2(13Z,16Z))', 'PE(16:1(9Z)/22:…
770.572	231838	C44H81NO7	[M+Cl]-	770.571	1.99	['DGTS(16:0/18:2(9Z,12Z))']
770.627	34017.8	0
771.52	19111.3	C40H73O8P	[M+Hac-H]-	771.518	1.88	['PA(15:1(9Z)/22:2(13Z,16Z))', 'PA(17:0/20:3(8Z,11Z,14Z))', 'PA(17:1(9Z)/20:2(11Z,14Z))', 'PA(17:2(9Z,12Z)/20:1(11Z))', 'PA(18:2(9Z,12Z)/19:1(9Z))', 'PA(18:3(6Z,9Z,12Z)/19:0)', 'PA(18:3(9Z,12Z,15Z)/19:0)', 'PA(19:0/18:3(6Z,9Z,12Z))', 'PA(19:0/18:3(9Z,12Z,15Z))', 'PA(19:1(9Z)/18:2(9Z,12Z))', 'PA(20:1(11Z)/17:2(9Z,12Z))', 'PA(20:2(11Z,14Z)/17:1(9Z))', 'PA(20:3(8Z,11Z,14Z)/17:0)', 'PA(22:2(13Z,16Z)/…
749.533	20859.3	C40H79O10P	[M-H]-	749.534	-0.71	['PG(12:0/22:0)', 'PG(13:0/21:0)', 'PG(14:0/20:0)', 'PG(15:0/19:0)', 'PG(16:0/18:0)', 'PG(17:0/17:0)', 'PG(18:0/16:0)', 'PG(19:0/15:0)', 'PG(20:0/14:0)', 'PG(21:0/13:0)', 'PG(22:0/12:0)']
771.52	19111.3	C47H68O5	[M+Hac-H]-	771.521	-1.19	['DG(22:6(4Z,7Z,10Z,13Z,16Z,19Z)/22:6(4Z,7Z,10Z,13Z,16Z,19Z)/0:0)']
771.575	116482	0
771.64	91003.2	C44H89N2O6P	[M-H]-	771.639	1.28	['SM(d16:1/23:0)', 'SM(d17:1/22:0)', 'SM(d18:1/21:0)', 'SM(d19:1/20:0)', 'SM(d20:1/19:0)']
772.513	22212.6	C39H72NO8P	[M+Hac-H]-	772.513	-0.4	['PC(13:0/18:3(6Z,9Z,12Z))', 'PC(13:0/18:3(9Z,12Z,15Z))', 'PC(14:1(9Z)/17:2(9Z,12Z))', 'PC(17:2(9Z,12Z)/14:1(9Z))', 'PC(18:3(6Z,9Z,12Z)/13:0)', 'PC(18:3(9Z,12Z,15Z)/13:0)', 'PE(14:0/20:3(8Z,11Z,14Z))', 'PE(14:1(9Z)/20:2(11Z,14Z))', 'PE(16:0/18:3(6Z,9Z,12Z))', 'PE(16:0/18:3(9Z,12Z,15Z))', 'PE(16:1(9Z)/18:2(9Z,12Z))', 'PE(17:1(9Z)/17:2(9Z,12Z))', 'PE(17:2(9Z,12Z)/17:1(9Z))', 'PE(18:2(9Z,12Z)/16:1(9…
772.513	22212.6	C41H76NO10P	[M-H]-	772.513	-0.4	['PS(13:0/22:2(13Z,16Z))', 'PS(15:0/20:2(11Z,14Z))', 'PS(15:1(9Z)/20:1(11Z))', 'PS(16:1(9Z)/19:1(9Z))', 'PS(17:0/18:2(9Z,12Z))', 'PS(17:1(9Z)/18:1(9Z))', 'PS(17:2(9Z,12Z)/18:0)', 'PS(18:0/17:2(9Z,12Z))', 'PS(18:1(9Z)/17:1(9Z))', 'PS(18:2(9Z,12Z)/17:0)', 'PS(19:1(9Z)/16:1(9Z))', 'PS(20:1(11Z)/15:1(9Z))', 'PS(20:2(11Z,14Z)/15:0)', 'PS(22:2(13Z,16Z)/13:0)']
772.551	22718.7	C40H76NO7P	[M+Hac-H]-	772.55	1.68	['PC(O-14:0/18:3(9Z,12Z,15Z))', 'PE(P-18:0/17:2(9Z,12Z))']
772.551	22718.7	C42H80NO9P	[M-H]-	772.55	1.68	['PS(O-16:0/20:2(11Z,14Z))', 'PS(O-18:0/18:2(9Z,12Z))', 'PS(P-16:0/20:1(11Z))', 'PS(P-18:0/18:1(9Z))', 'PS(P-20:0/16:1(9Z))']
772.588	33848.2	C43H84NO8P	[M-H]-	772.586	2.69	['PC(13:0/22:1(11Z))', 'PC(14:1(9Z)/21:0)', 'PC(15:0/20:1(11Z))', 'PC(15:1(9Z)/20:0)', 'PC(16:0/19:1(9Z))', 'PC(16:1(9Z)/19:0)', 'PC(17:0/18:1(9Z))', 'PC(17:1(9Z)/18:0)', 'PC(18:0/17:1(9Z))', 'PC(18:1(9Z)/17:0)', 'PC(19:0/16:1(9Z))', 'PC(19:1(9Z)/16:0)', 'PC(20:0/15:1(9Z))', 'PC(20:1(11Z)/15:0)', 'PC(21:0/14:1(9Z))', 'PC(22:1(11Z)/13:0)', 'PE(16:0/22:1(11Z))', 'PE(16:0/22:1(13Z))', 'PE(16:1(9Z)/2…
772.643	44362.7	0
773.535	38937.3	C40H75O8P	[M+Hac-H]-	773.534	0.99	['NA', 'PA(15:0/22:2(13Z,16Z))', 'PA(15:1(9Z)/22:1(11Z))', 'PA(17:0/20:2(11Z,14Z))', 'PA(17:1(9Z)/20:1(11Z))', 'PA(17:2(9Z,12Z)/20:0)', 'PA(18:1(9Z)/19:1(9Z))', 'PA(18:2(9Z,12Z)/19:0)', 'PA(19:0/18:2(9Z,12Z))', 'PA(19:1(9Z)/18:1(9Z))', 'PA(20:0/17:2(9Z,12Z))', 'PA(20:1(11Z)/17:1(9Z))', 'PA(20:2(11Z,14Z)/17:0)', 'PA(22:1(11Z)/15:1(9Z))', 'PA(22:2(13Z,16Z)/15:0)']
817.561	10215.7	C42H79O9P	[M+Hac-H]-	817.56	1.14	['PG(O-16:0/20:3(8Z,11Z,14Z))', 'PG(O-18:0/18:3(6Z,9Z,12Z))', 'PG(O-18:0/18:3(9Z,12Z,15Z))', 'PG(P-16:0/20:2(11Z,14Z))', 'PG(P-18:0/18:2(9Z,12Z))']
773.535	38937.3	C47H70O5	[M+Hac-H]-	773.536	-2.07	['DG(22:5(7Z,10Z,13Z,16Z,19Z)/22:6(4Z,7Z,10Z,13Z,16Z,19Z)/0:0)']
773.591	20625.4	C45H78O6	[M+Hac-H]-	773.594	-3.6	['TG(12:0/12:0/18:4(6Z,9Z,12Z,15Z))[iso3]']
775.597	24932.2	C40H81N2O6P	[M+Hac-H]-	775.597	0.53	['SM(d18:1/17:0)', 'SM(d19:1/16:0)']
776.546	45352.7	C39H76NO8P	[M+Hac-H]-	776.545	1.38	['PC(12:0/19:1(9Z))', 'PC(13:0/18:1(9Z))', 'PC(14:0/17:1(9Z))', 'PC(14:1(9Z)/17:0)', 'PC(15:0/16:1(9Z))', 'PC(15:1(9Z)/16:0)', 'PC(16:0/15:1(14))', 'PC(16:0/15:1(9Z))', 'PC(16:1(9Z)/15:0)', 'PC(17:0/14:1(9Z))', 'PC(17:1(9Z)/14:0)', 'PC(18:1(9Z)/13:0)', 'PC(19:1(9Z)/12:0)', 'PE(12:0/22:1(11Z))', 'PE(14:0/20:1(11Z))', 'PE(14:1(9Z)/20:0)', 'PE(15:0/19:1(9Z))', 'PE(15:1(9Z)/19:0)', 'PE(16:0/18:1(11Z)…
776.546	45352.7	C41H80NO10P	[M-H]-	776.545	1.38	['PS(13:0/22:0)', 'PS(14:0/21:0)', 'PS(15:0/20:0)', 'PS(16:0/19:0)', 'PS(17:0/18:0)', 'PS(18:0/17:0)', 'PS(19:0/16:0)', 'PS(20:0/15:0)', 'PS(21:0/14:0)', 'PS(22:0/13:0)']
776.546	45352.7	C42H79NO9	[M+Cl]-	776.545	1.15	['NA']
778.502	33704.4	C43H74NO9P	[M-H]-	778.503	-0.62	['PE(16:0/22:6(54Z,7Z,10Z,12E,16Z,19Z)(14OH))']
780.482	42972.8	C40H68NO8P	[M+Hac-H]-	780.482	0.1	['PE(13:0/22:6(4Z,7Z,10Z,13Z,16Z,19Z))', 'PE(15:1(9Z)/20:5(5Z,8Z,11Z,14Z,17Z))', 'PE(17:2(9Z,12Z)/18:4(6Z,9Z,12Z,15Z))', 'PE(18:4(6Z,9Z,12Z,15Z)/17:2(9Z,12Z))', 'PE(20:5(5Z,8Z,11Z,14Z,17Z)/15:1(9Z))', 'PE(22:6(4Z,7Z,10Z,13Z,16Z,19Z)/13:0)']
780.482	42972.8	C42H72NO10P	[M-H]-	780.482	0.1	['PS(14:1(9Z)/22:4(7Z,10Z,13Z,16Z))', 'PS(16:0/20:5(5Z,8Z,11Z,14Z,17Z))', 'PS(16:1(9Z)/20:4(5Z,8Z,11Z,14Z))', 'PS(18:1(9Z)/18:4(6Z,9Z,12Z,15Z))', 'PS(18:2(9Z,12Z)/18:3(6Z,9Z,12Z))', 'PS(18:2(9Z,12Z)/18:3(9Z,12Z,15Z))', 'PS(18:3(6Z,9Z,12Z)/18:2(9Z,12Z))', 'PS(18:3(9Z,12Z,15Z)/18:2(9Z,12Z))', 'PS(18:4(6Z,9Z,12Z,15Z)/18:1(9Z))', 'PS(20:4(5Z,8Z,11Z,14Z)/16:1(9Z))', 'PS(20:5(5Z,8Z,11Z,14Z,17Z)/16:0)',…
780.556	24727.5	C44H80NO8P	[M-H]-	780.555	1.04	['PC(14:0/22:4(7Z,10Z,13Z,16Z))', 'PC(16:0/20:4(5E,8E,11E,14E))', 'PC(16:0/20:4(5Z,8Z,11Z,14Z))', 'PC(16:1(9Z)/20:3(8Z,11Z,14Z))', 'PC(18:0/18:4(6Z,9Z,12Z,15Z))', 'PC(18:0/18:4(9E,11E,13E,15E))', 'PC(18:1(9Z)/18:3(6Z,9Z,12Z))', 'PC(18:1(9Z)/18:3(9Z,12Z,15Z))', 'PC(18:2(2E,4E)/18:2(2E,4E))', 'PC(18:2(2Z,4Z)/18:2(2Z,4Z))', 'PC(18:2(6Z,9Z)/18:2(6Z,9Z))', 'PC(18:2(9Z,11Z)/18:2(9Z,11Z))', 'PC(18:2(9Z,…
781.486	10440.9	C39H75O13P	[M-H]-	781.487	-1.39	['PI(12:0/18:0)', 'PI(13:0/17:0)', 'PI(14:0/16:0)', 'PI(15:0/15:0)', 'PI(16:0/14:0)', 'PI(17:0/13:0)', 'PI(18:0/12:0)']
782.498	32069.6	C40H70NO8P	[M+Hac-H]-	782.498	0.43	['PC(12:0/20:5(5Z,8Z,11Z,14Z,17Z))', 'PC(14:1(9Z)/18:4(6Z,9Z,12Z,15Z))', 'PC(18:4(6Z,9Z,12Z,15Z)/14:1(9Z))', 'PC(20:5(5Z,8Z,11Z,14Z,17Z)/12:0)', 'PE(15:0/20:5(5Z,8Z,11Z,14Z,17Z))', 'PE(15:1(9Z)/20:4(5Z,8Z,11Z,14Z))', 'PE(17:1(9Z)/18:4(6Z,9Z,12Z,15Z))', 'PE(17:2(9Z,12Z)/18:3(6Z,9Z,12Z))', 'PE(17:2(9Z,12Z)/18:3(9Z,12Z,15Z))', 'PE(18:3(6Z,9Z,12Z)/17:2(9Z,12Z))', 'PE(18:3(9Z,12Z,15Z)/17:2(9Z,12Z))', …
782.498	32069.6	C42H74NO10P	[M-H]-	782.498	0.43	['PS(14:0/22:4(7Z,10Z,13Z,16Z))', 'PS(16:0/20:4(5Z,8Z,11Z,14Z))', 'PS(16:1(9Z)/20:3(8Z,11Z,14Z))', 'PS(18:0/18:4(6Z,9Z,12Z,15Z))', 'PS(18:1(9Z)/18:3(6Z,9Z,12Z))', 'PS(18:1(9Z)/18:3(9Z,12Z,15Z))', 'PS(18:2(9Z,12Z)/18:2(9Z,12Z))', 'PS(18:3(6Z,9Z,12Z)/18:1(9Z))', 'PS(18:3(9Z,12Z,15Z)/18:1(9Z))', 'PS(18:4(6Z,9Z,12Z,15Z)/18:0)', 'PS(20:3(8Z,11Z,14Z)/16:1(9Z))', 'PS(20:4(5Z,8Z,11Z,14Z)/16:0)', 'PS(22:4…
785.553	31042.2	0
785.654	8275.61	C45H91N2O6P	[M-H]-	785.654	-0.15	['SM(d16:1/24:0)', 'SM(d18:1/22:0)']
786.529	163555	C40H74NO8P	[M+Hac-H]-	786.529	0.33	['PC(12:0/20:3(8Z,11Z,14Z))', 'PC(14:0/18:3(6Z,9Z,12Z))', 'PC(14:0/18:3(9Z,12Z,15Z))', 'PC(14:1(9Z)/18:2(9Z,12Z))', 'PC(15:1(9Z)/17:2(9Z,12Z))', 'PC(17:2(9Z,12Z)/15:1(9Z))', 'PC(18:2(9Z,12Z)/14:1(9Z))', 'PC(18:3(6Z,9Z,12Z)/14:0)', 'PC(18:3(9Z,12Z,15Z)/14:0)', 'PC(20:3(8Z,11Z,14Z)/12:0)', 'PE(15:0/20:3(8Z,11Z,14Z))', 'PE(15:1(9Z)/20:2(11Z,14Z))', 'PE(17:0/18:3(6Z,9Z,12Z))', 'PE(17:0/18:3(9Z,12Z,15…
786.529	163555	C42H78NO10P	[M-H]-	786.529	0.33	['PS(14:0/22:2(13Z,16Z))', 'PS(14:1(9Z)/22:1(11Z))', 'PS(16:0/20:2(11Z,14Z))', 'PS(16:1(9Z)/20:1(11Z))', 'PS(17:1(9Z)/19:1(9Z))', 'PS(17:2(9Z,12Z)/19:0)', 'PS(18:0/18:2(9Z,12Z))', 'PS(18:1(9Z)/18:1(9Z))', 'PS(18:2(9Z,12Z)/18:0)', 'PS(19:0/17:2(9Z,12Z))', 'PS(19:1(9Z)/17:1(9Z))', 'PS(20:1(11Z)/16:1(9Z))', 'PS(20:2(11Z,14Z)/16:0)', 'PS(22:1(11Z)/14:1(9Z))', 'PS(22:2(13Z,16Z)/14:0)']
765.472	53074.3	C42H71O10P	[M-H]-	765.471	1.47	['PG(14:0/22:6(4Z,7Z,10Z,13Z,16Z,19Z))', 'PG(16:1(9Z)/20:5(5Z,8Z,11Z,14Z,17Z))', 'PG(18:2(9Z,12Z)/18:4(6Z,9Z,12Z,15Z))', 'PG(18:3(6Z,9Z,12Z)/18:3(6Z,9Z,12Z))', 'PG(18:3(6Z,9Z,12Z)/18:3(9Z,12Z,15Z))', 'PG(18:3(9Z,12Z,15Z)/18:3(6Z,9Z,12Z))', 'PG(18:3(9Z,12Z,15Z)/18:3(9Z,12Z,15Z))', 'PG(18:4(6Z,9Z,12Z,15Z)/18:2(9Z,12Z))', 'PG(20:5(5Z,8Z,11Z,14Z,17Z)/16:1(9Z))', 'PG(22:6(4Z,7Z,10Z,13Z,16Z,19Z)/14:0)']
787.532	77909.6	0
787.597	16745.7	C41H81N2O6P	[M+Hac-H]-	787.597	-0.56	['SM(d16:1/20:1)', 'SM(d18:0/18:2)', 'SM(d18:1/18:1(9Z))', 'SM(d18:2/18:0)', 'SM(d19:1/17:1)']
788.524	90983.5	C43H72NO6P	[M+Hac-H]-	788.524	1.13	['NA']
788.524	90983.5	C45H76NO8P	[M-H]-	788.524	1.13	['PC(15:1(9Z)/22:6(4Z,7Z,10Z,13Z,16Z,19Z))', 'PC(17:2(9Z,12Z)/20:5(5Z,8Z,11Z,14Z,17Z))', 'PC(20:5(5Z,8Z,11Z,14Z,17Z)/17:2(9Z,12Z))', 'PC(22:6(4Z,7Z,10Z,13Z,16Z,19Z)/15:1(9Z))', 'PE(18:1(9Z)/22:6(4Z,7Z,10Z,13Z,16Z,19Z))', 'PE(18:3(6Z,9Z,12Z)/22:4(7Z,10Z,13Z,16Z))', 'PE(18:3(9Z,12Z,15Z)/22:4(7Z,10Z,13Z,16Z))', 'PE(20:2(11Z,14Z)/20:5(5Z,8Z,11Z,14Z,17Z))', 'PE(20:3(8Z,11Z,14Z)/20:4(5Z,8Z,11Z,14Z))', …
788.545	131141	C40H76NO8P	[M+Hac-H]-	788.545	0.02	['PC(12:0/20:2(11Z,14Z))', 'PC(14:0/18:2(11Z,14Z))', 'PC(14:0/18:2(9Z,12Z))', 'PC(14:1(9Z)/18:1(9Z))', 'PC(15:0/17:2(9Z,12Z))', 'PC(15:1(9Z)/17:1(9Z))', 'PC(16:1(9E)/16:1(9E))', 'PC(16:1(9Z)/16:1(9Z))', 'PC(17:1(9Z)/15:1(9Z))', 'PC(17:2(9Z,12Z)/15:0)', 'PC(18:1(9Z)/14:1(9Z))', 'PC(18:2(9Z,12Z)/14:0)', 'PC(20:2(11Z,14Z)/12:0)', 'PE(13:0/22:2(13Z,16Z))', 'PE(15:0/20:2(11Z,14Z))', 'PE(15:1(9Z)/20:1(…
788.545	131141	C42H80NO10P	[M-H]-	788.545	0.02	['PS(14:0/22:1(11Z))', 'PS(14:1(9Z)/22:0)', 'PS(15:1(9Z)/21:0)', 'PS(16:0/20:1(11Z))', 'PS(16:1(9Z)/20:0)', 'PS(17:0/19:1(9Z))', 'PS(17:1(9Z)/19:0)', 'PS(18:0/18:1(9Z))', 'PS(18:1(9Z)/18:0)', 'PS(19:0/17:1(9Z))', 'PS(19:1(9Z)/17:0)', 'PS(20:0/16:1(9Z))', 'PS(20:1(11Z)/16:0)', 'PS(21:0/15:1(9Z))', 'PS(22:0/14:1(9Z))', 'PS(22:1(11Z)/14:0)']
788.6	5320.2	0
767.488	32065.9	C42H73O10P	[M-H]-	767.487	1.95	['PG(14:1(9Z)/22:4(7Z,10Z,13Z,16Z))', 'PG(16:0/20:5(5Z,8Z,11Z,14Z,17Z))', 'PG(16:1(9Z)/20:4(5Z,8Z,11Z,14Z))', 'PG(18:1(9Z)/18:4(6Z,9Z,12Z,15Z))', 'PG(18:2(9Z,12Z)/18:3(6Z,9Z,12Z))', 'PG(18:2(9Z,12Z)/18:3(9Z,12Z,15Z))', 'PG(18:3(6Z,9Z,12Z)/18:2(9Z,12Z))', 'PG(18:3(9Z,12Z,15Z)/18:2(9Z,12Z))', 'PG(18:4(6Z,9Z,12Z,15Z)/18:1(9Z))', 'PG(20:4(5Z,8Z,11Z,14Z)/16:1(9Z))', 'PG(20:5(5Z,8Z,11Z,14Z,17Z)/16:0)',…
789.528	43098.1	C43H78O10	[M+Cl]-	789.529	-1.41	['MGDG(16:0/18:2(9Z,12Z))']
789.548	61165.8	0
789.613	117133	C41H83N2O6P	[M+Hac-H]-	789.613	0.23	['SM(d16:1/20:0)', 'SM(d18:0/18:1(9Z))', 'SM(d18:1/18:0)']
790.541	125531	C43H74NO6P	[M+Hac-H]-	790.539	1.96	['NA']
790.541	125531	C45H78NO8P	[M-H]-	790.539	1.96	['PC(15:0/22:6(4Z,7Z,10Z,13Z,16Z,19Z))', 'PC(17:1(9Z)/20:5(5Z,8Z,11Z,14Z,17Z))', 'PC(17:2(9Z,12Z)/20:4(5Z,8Z,11Z,14Z))', 'PC(20:4(5Z,8Z,11Z,14Z)/17:2(9Z,12Z))', 'PC(20:5(5Z,8Z,11Z,14Z,17Z)/17:1(9Z))', 'PC(22:6(4Z,7Z,10Z,13Z,16Z,19Z)/15:0)', 'PE(18:0/22:6(4Z,7Z,10Z,13Z,16Z,19Z))', 'PE(18:2(9Z,12Z)/22:4(7Z,10Z,13Z,16Z))', 'PE(18:4(6Z,9Z,12Z,15Z)/22:2(13Z,16Z))', 'PE(20:1(11Z)/20:5(5Z,8Z,11Z,14Z,17Z…
790.56	400963	C40H78NO8P	[M+Hac-H]-	790.56	-0.06	['PC(12:0/20:1(11Z))', 'PC(13:0/19:1(9Z))', 'PC(14:0/18:1(11Z))', 'PC(14:0/18:1(9Z))', 'PC(14:1(9Z)/18:0)', 'PC(15:0/17:1(9Z))', 'PC(15:1(9Z)/17:0)', 'PC(16:0/16:1(9Z))', 'PC(16:1(9Z)/16:0)', 'PC(17:0/15:1(9Z))', 'PC(17:1(9Z)/15:0)', 'PC(18:0/14:1(9Z))', 'PC(18:1(9Z)/14:0)', 'PC(19:1(9Z)/13:0)', 'PC(20:1(11Z)/12:0)', 'PE(13:0/22:1(11Z))', 'PE(14:1(9Z)/21:0)', 'PE(15:0/20:1(11Z))', 'PE(15:1(9Z)/20…
790.56	400963	C42H82NO10P	[M-H]-	790.56	-0.06	['PS(14:0/22:0)', 'PS(15:0/21:0)', 'PS(16:0/20:0)', 'PS(17:0/19:0)', 'PS(18:0/18:0)', 'PS(19:0/17:0)', 'PS(20:0/16:0)', 'PS(21:0/15:0)', 'PS(22:0/14:0)']
790.579	3259.17	C44H83NO8	[M+(37Cl)]-	790.578	0.85	['GalCer(d18:2/20:0)', 'GlcCer(d18:2/20:0)']
790.616	54559.2	0
791.52	31422.6	C43H79O8P	[M+(37Cl)]-	791.518	2.75	['PA(18:1(9Z)/22:2(13Z,16Z))', 'PA(18:2(9Z,12Z)/22:1(11Z))', 'PA(18:3(6Z,9Z,12Z)/22:0)', 'PA(18:3(9Z,12Z,15Z)/22:0)', 'PA(20:0/20:3(8Z,11Z,14Z))', 'PA(20:1(11Z)/20:2(11Z,14Z))', 'PA(20:2(11Z,14Z)/20:1(11Z))', 'PA(20:3(8Z,11Z,14Z)/20:0)', 'PA(22:0/18:3(6Z,9Z,12Z))', 'PA(22:0/18:3(9Z,12Z,15Z))', 'PA(22:1(11Z)/18:2(9Z,12Z))', 'PA(22:2(13Z,16Z)/18:1(9Z))']
769.504	36134.5	C42H75O10P	[M-H]-	769.503	1.71	['PG(14:0/22:4(7Z,10Z,13Z,16Z))', 'PG(16:0/20:4(5Z,8Z,11Z,14Z))', 'PG(16:1(9Z)/20:3(8Z,11Z,14Z))', 'PG(18:0/18:4(6Z,9Z,12Z,15Z))', 'PG(18:1(9Z)/18:3(6Z,9Z,12Z))', 'PG(18:1(9Z)/18:3(9Z,12Z,15Z))', 'PG(18:2(9Z,12Z)/18:2(9Z,12Z))', 'PG(18:3(6Z,9Z,12Z)/18:1(9Z))', 'PG(18:3(9Z,12Z,15Z)/18:1(9Z))', 'PG(18:4(6Z,9Z,12Z,15Z)/18:0)', 'PG(20:3(8Z,11Z,14Z)/16:1(9Z))', 'PG(20:4(5Z,8Z,11Z,14Z)/16:0)', 'PG(22:4…
791.544	71407.8	C43H80O10	[M+Cl]-	791.545	-1.32	['MGDG(16:0/18:1(9Z))']
791.563	181934	C43H83N2O6P	[M+(37Cl)]-	791.565	-2.4	['SM(d18:2/20:1)']
791.619	14137.5	C42H85O7P	[M+Hac-H]-	791.617	1.73	['PA(O-18:0/21:0)', 'PA(O-20:0/19:0)']
771.52	19111.3	C42H77O10P	[M-H]-	771.518	1.88	['PG(14:1(9Z)/22:2(13Z,16Z))', 'PG(16:0/20:3(8Z,11Z,14Z))', 'PG(16:1(9Z)/20:2(11Z,14Z))', 'PG(17:2(9Z,12Z)/19:1(9Z))', 'PG(18:0/18:3(6Z,9Z,12Z))', 'PG(18:0/18:3(9Z,12Z,15Z))', 'PG(18:1(9Z)/18:2(9Z,12Z))', 'PG(18:2(9Z,12Z)/18:1(9Z))', 'PG(18:3(6Z,9Z,12Z)/18:0)', 'PG(18:3(9Z,12Z,15Z)/18:0)', 'PG(19:1(9Z)/17:2(9Z,12Z))', 'PG(20:2(11Z,14Z)/16:1(9Z))', 'PG(20:3(8Z,11Z,14Z)/16:0)', 'PG(22:2(13Z,16Z)/14…
791.619	14137.5	C51H84O6	[M-H]-	791.62	-1.26	['TG(12:0/14:1(9Z)/22:6(4Z,7Z,10Z,13Z,16Z,19Z))[iso6]', 'TG(12:0/18:3(6Z,9Z,12Z)/18:4(6Z,9Z,12Z,15Z))[iso6]', 'TG(12:0/18:3(9Z,12Z,15Z)/18:4(6Z,9Z,12Z,15Z))[iso6]', 'TG(14:1(9Z)/14:1(9Z)/20:5(5Z,8Z,11Z,14Z,17Z))[iso3]']
792.435	11668	C43H68NO8P	[M+Cl]-	792.438	-3.22	['PE(18:4(6Z,9Z,12Z,15Z)/20:5(5Z,8Z,11Z,14Z,17Z))', 'PE(20:5(5Z,8Z,11Z,14Z,17Z)/18:4(6Z,9Z,12Z,15Z))']
792.48	18529.1	C41H68NO8P	[M+Hac-H]-	792.482	-2.8	['PE(14:1(9Z)/22:6(4Z,7Z,10Z,13Z,16Z,19Z))', 'PE(18:3(6Z,9Z,12Z)/18:4(6Z,9Z,12Z,15Z))', 'PE(18:3(9Z,12Z,15Z)/18:4(6Z,9Z,12Z,15Z))', 'PE(18:4(6Z,9Z,12Z,15Z)/18:3(6Z,9Z,12Z))', 'PE(18:4(6Z,9Z,12Z,15Z)/18:3(9Z,12Z,15Z))', 'PE(22:6(4Z,7Z,10Z,13Z,16Z,19Z)/14:1(9Z))']
792.48	18529.1	C43H72NO10P	[M-H]-	792.482	-2.8	['PS(15:0/22:6(4Z,7Z,10Z,13Z,16Z,19Z))', 'PS(17:1(9Z)/20:5(5Z,8Z,11Z,14Z,17Z))', 'PS(17:2(9Z,12Z)/20:4(5Z,8Z,11Z,14Z))', 'PS(20:4(5Z,8Z,11Z,14Z)/17:2(9Z,12Z))', 'PS(20:5(5Z,8Z,11Z,14Z,17Z)/17:1(9Z))', 'PS(22:6(4Z,7Z,10Z,13Z,16Z,19Z)/15:0)']
792.556	117928	C45H80NO8P	[M-H]-	792.555	1.3	['PC(15:1(9Z)/22:4(7Z,10Z,13Z,16Z))', 'PC(17:0/20:5(5Z,8Z,11Z,14Z,17Z))', 'PC(17:1(9Z)/20:4(5Z,8Z,11Z,14Z))', 'PC(17:2(9Z,12Z)/20:3(8Z,11Z,14Z))', 'PC(18:4(6Z,9Z,12Z,15Z)/19:1(9Z))', 'PC(19:1(9Z)/18:4(6Z,9Z,12Z,15Z))', 'PC(20:3(8Z,11Z,14Z)/17:2(9Z,12Z))', 'PC(20:4(5Z,8Z,11Z,14Z)/17:1(9Z))', 'PC(20:5(5Z,8Z,11Z,14Z,17Z)/17:0)', 'PC(22:4(7Z,10Z,13Z,16Z)/15:1(9Z))', 'PE(18:1(9Z)/22:4(7Z,10Z,13Z,16Z))…
792.576	128939	C40H80NO8P	[M+Hac-H]-	792.576	0.47	['Colfosceril palmitate (USAN/INN)', 'PC(10:0/22:0)', 'PC(11:0/21:0)', 'PC(12:0/20:0)', 'PC(13:0/19:0)', 'PC(14:0/18:0)', 'PC(15:0/17:0)', 'PC(17:0/15:0)', 'PC(18:0/14:0)', 'PC(19:0/13:0)', 'PC(20:0/12:0)', 'PC(21:0/11:0)', 'PC(22:0/10:0)', 'PC(9:0/23:0)', 'PE(13:0/22:0)', 'PE(14:0/21:0)', 'PE(15:0/20:0)', 'PE(16:0/19:0)', 'PE(17:0/18:0)', 'PE(18:0(10(R)Me)/16:0)', 'PE(18:0/17:0)', 'PE(19:0/16:0)…
792.745	10668.7	0
773.535	38937.3	C42H79O10P	[M-H]-	773.534	0.99	['LBPA(18:1(9Z)/18:1(9Z))', 'PG(14:0/22:2(13Z,16Z))', 'PG(14:1(9Z)/22:1(11Z))', 'PG(16:0/20:2(11Z,14Z))', 'PG(16:1(9Z)/20:1(11Z))', 'PG(17:1(9Z)/19:1(9Z))', 'PG(17:2(9Z,12Z)/19:0)', 'PG(18:0/18:2(9Z,12Z))', 'PG(18:1(9E)/18:1(9E))', 'PG(18:1(9Z)/18:1(9Z))', 'PG(18:2(9Z,12Z)/18:0)', 'PG(19:0/17:2(9Z,12Z))', 'PG(19:1(9Z)/17:1(9Z))', 'PG(20:1(11Z)/16:1(9Z))', 'PG(20:2(11Z,14Z)/16:0)', 'PG(22:1(11Z)/1…
793.58	67410.4	C43H85N2O6P	[M+(37Cl)]-	793.581	-1.57	['SM(d16:1/22:1)', 'SM(d18:1/20:1)', 'SM(d18:2/20:0)']
793.638	45590.9	C51H86O6	[M-H]-	793.635	3.95	['TG(12:0/14:0/22:6(4Z,7Z,10Z,13Z,16Z,19Z))[iso6]', 'TG(12:0/14:1(9Z)/22:5(7Z,10Z,13Z,16Z,19Z))[iso6]', 'TG(12:0/16:1(9Z)/20:5(5Z,8Z,11Z,14Z,17Z))[iso6]', 'TG(12:0/18:2(9Z,12Z)/18:4(6Z,9Z,12Z,15Z))[iso6]', 'TG(12:0/18:3(6Z,9Z,12Z)/18:3(6Z,9Z,12Z))[iso3]', 'TG(12:0/18:3(6Z,9Z,12Z)/18:3(9Z,12Z,15Z))[iso6]', 'TG(12:0/18:3(9Z,12Z,15Z)/18:3(9Z,12Z,15Z))[iso3]', 'TG(13:0/13:0/22:6(4Z,7Z,10Z,13Z,16Z,19Z…
794.451	16526.9	C43H70NO8P	[M+Cl]-	794.453	-2.5	['PE(18:3(6Z,9Z,12Z)/20:5(5Z,8Z,11Z,14Z,17Z))', 'PE(18:3(9Z,12Z,15Z)/20:5(5Z,8Z,11Z,14Z,17Z))', 'PE(18:4(6Z,9Z,12Z,15Z)/20:4(5Z,8Z,11Z,14Z))', 'PE(20:4(5Z,8Z,11Z,14Z)/18:4(6Z,9Z,12Z,15Z))', 'PE(20:5(5Z,8Z,11Z,14Z,17Z)/18:3(6Z,9Z,12Z))', 'PE(20:5(5Z,8Z,11Z,14Z,17Z)/18:3(9Z,12Z,15Z))']
794.496	86240.4	C41H70NO8P	[M+Hac-H]-	794.498	-2.44	['PE(14:0/22:6(4Z,7Z,10Z,13Z,16Z,19Z))', 'PE(16:1(9Z)/20:5(5Z,8Z,11Z,14Z,17Z))', 'PE(18:2(9Z,12Z)/18:4(6Z,9Z,12Z,15Z))', 'PE(18:3(6Z,9Z,12Z)/18:3(6Z,9Z,12Z))', 'PE(18:3(6Z,9Z,12Z)/18:3(9Z,12Z,15Z))', 'PE(18:3(9Z,12Z,15Z)/18:3(6Z,9Z,12Z))', 'PE(18:3(9Z,12Z,15Z)/18:3(9Z,12Z,15Z))', 'PE(18:4(6Z,9Z,12Z,15Z)/18:2(9Z,12Z))', 'PE(20:5(5Z,8Z,11Z,14Z,17Z)/16:1(9Z))', 'PE(22:6(4Z,7Z,10Z,13Z,16Z,19Z)/14:0)']
794.496	86240.4	C43H74NO10P	[M-H]-	794.498	-2.44	['PS(15:1(9Z)/22:4(7Z,10Z,13Z,16Z))', 'PS(17:0/20:5(5Z,8Z,11Z,14Z,17Z))', 'PS(17:1(9Z)/20:4(5Z,8Z,11Z,14Z))', 'PS(17:2(9Z,12Z)/20:3(8Z,11Z,14Z))', 'PS(18:4(6Z,9Z,12Z,15Z)/19:1(9Z))', 'PS(19:1(9Z)/18:4(6Z,9Z,12Z,15Z))', 'PS(20:3(8Z,11Z,14Z)/17:2(9Z,12Z))', 'PS(20:4(5Z,8Z,11Z,14Z)/17:1(9Z))', 'PS(20:5(5Z,8Z,11Z,14Z,17Z)/17:0)', 'PS(22:4(7Z,10Z,13Z,16Z)/15:1(9Z))']
794.571	77599.4	C45H82NO8P	[M-H]-	794.571	0.67	['PC(15:0/22:4(7Z,10Z,13Z,16Z))', 'PC(17:0/20:4(5Z,8Z,11Z,14Z))', 'PC(17:1(9Z)/20:3(8Z,11Z,14Z))', 'PC(17:2(9Z,12Z)/20:2(11Z,14Z))', 'PC(18:3(6Z,9Z,12Z)/19:1(9Z))', 'PC(18:3(9Z,12Z,15Z)/19:1(9Z))', 'PC(18:4(6Z,9Z,12Z,15Z)/19:0)', 'PC(19:0/18:4(6Z,9Z,12Z,15Z))', 'PC(19:1(9Z)/18:3(6Z,9Z,12Z))', 'PC(19:1(9Z)/18:3(9Z,12Z,15Z))', 'PC(20:2(11Z,14Z)/17:2(9Z,12Z))', 'PC(20:3(8Z,11Z,14Z)/17:1(9Z))', 'PC(2…
794.641	23755.5	0
795.499	39299.3	C47H73O8P	[M-H]-	795.497	2.39	['PA(22:4(7Z,10Z,13Z,16Z)/22:6(4Z,7Z,10Z,13Z,16Z,19Z))', 'PA(22:6(4Z,7Z,10Z,13Z,16Z,19Z)/22:4(7Z,10Z,13Z,16Z))']
795.574	34477.1	C40H81O9P	[M+Hac-H]-	795.576	-2.37	['Mannosyl-1beta-phosphomycoketide C34', 'PG(O-16:0/18:0)', 'PG(O-18:0/16:0)', 'PG(O-20:0/14:0)']
796.467	29707.5	C43H72NO8P	[M+Cl]-	796.469	-2.79	['PE(16:1(9Z)/22:6(4Z,7Z,10Z,13Z,16Z,19Z))', 'PE(18:2(9Z,12Z)/20:5(5Z,8Z,11Z,14Z,17Z))', 'PE(18:3(6Z,9Z,12Z)/20:4(5Z,8Z,11Z,14Z))', 'PE(18:3(9Z,12Z,15Z)/20:4(5Z,8Z,11Z,14Z))', 'PE(18:4(6Z,9Z,12Z,15Z)/20:3(8Z,11Z,14Z))', 'PE(20:3(8Z,11Z,14Z)/18:4(6Z,9Z,12Z,15Z))', 'PE(20:4(5Z,8Z,11Z,14Z)/18:3(6Z,9Z,12Z))', 'PE(20:4(5Z,8Z,11Z,14Z)/18:3(9Z,12Z,15Z))', 'PE(20:5(5Z,8Z,11Z,14Z,17Z)/18:2(9Z,12Z))', 'PE(…
796.512	49038.2	C41H72NO8P	[M+Hac-H]-	796.513	-1.48	['PC(13:0/20:5(5Z,8Z,11Z,14Z,17Z))', 'PC(15:1(9Z)/18:4(6Z,9Z,12Z,15Z))', 'PC(18:4(6Z,9Z,12Z,15Z)/15:1(9Z))', 'PC(20:5(5Z,8Z,11Z,14Z,17Z)/13:0)', 'PE(14:1(9Z)/22:4(7Z,10Z,13Z,16Z))', 'PE(16:0/20:5(5Z,8Z,11Z,14Z,17Z))', 'PE(16:1(9Z)/20:4(5Z,8Z,11Z,14Z))', 'PE(18:1(9Z)/18:4(6Z,9Z,12Z,15Z))', 'PE(18:2(9Z,12Z)/18:3(6Z,9Z,12Z))', 'PE(18:2(9Z,12Z)/18:3(9Z,12Z,15Z))', 'PE(18:3(6Z,9Z,12Z)/18:2(9Z,12Z))', …
796.512	49038.2	C43H76NO10P	[M-H]-	796.513	-1.48	['PS(15:0/22:4(7Z,10Z,13Z,16Z))', 'PS(17:0/20:4(5Z,8Z,11Z,14Z))', 'PS(17:1(9Z)/20:3(8Z,11Z,14Z))', 'PS(17:2(9Z,12Z)/20:2(11Z,14Z))', 'PS(18:3(6Z,9Z,12Z)/19:1(9Z))', 'PS(18:3(9Z,12Z,15Z)/19:1(9Z))', 'PS(18:4(6Z,9Z,12Z,15Z)/19:0)', 'PS(19:0/18:4(6Z,9Z,12Z,15Z))', 'PS(19:1(9Z)/18:3(6Z,9Z,12Z))', 'PS(19:1(9Z)/18:3(9Z,12Z,15Z))', 'PS(20:2(11Z,14Z)/17:2(9Z,12Z))', 'PS(20:3(8Z,11Z,14Z)/17:1(9Z))', 'PS(2…
796.551	33803.6	C42H76NO7P	[M+Hac-H]-	796.55	1.19	['PC(P-16:0/18:4(6Z,9Z,12Z,15Z))']
796.551	33803.6	C44H80NO9P	[M-H]-	796.55	1.19	['PC(16:0/20:4(5Z,8Z,10E,14Z)(12OH[S]))', 'PC(16:0/20:4(6E,8Z,11Z,14Z)(5OH[S]))', 'PS(O-16:0/22:4(7Z,10Z,13Z,16Z))', 'PS(O-18:0/20:4(5Z,8Z,11Z,14Z))', 'PS(O-20:0/18:4(6Z,9Z,12Z,15Z))', 'PS(P-18:0/20:3(8Z,11Z,14Z))', 'PS(P-20:0/18:3(6Z,9Z,12Z))', 'PS(P-20:0/18:3(9Z,12Z,15Z))']
796.586	78157.7	C45H84NO8P	[M-H]-	796.586	0.3	['PC(15:1(9Z)/22:2(13Z,16Z))', 'PC(17:0/20:3(8Z,11Z,14Z))', 'PC(17:1(9Z)/20:2(11Z,14Z))', 'PC(17:2(9Z,12Z)/20:1(11Z))', 'PC(18:2(9Z,12Z)/19:1(9Z))', 'PC(18:3(6Z,9Z,12Z)/19:0)', 'PC(18:3(9Z,12Z,15Z)/19:0)', 'PC(19:0/18:3(6Z,9Z,12Z))', 'PC(19:0/18:3(9Z,12Z,15Z))', 'PC(19:1(9Z)/18:2(9Z,12Z))', 'PC(20:1(11Z)/17:2(9Z,12Z))', 'PC(20:2(11Z,14Z)/17:1(9Z))', 'PC(20:3(8Z,11Z,14Z)/17:0)', 'PC(22:2(13Z,16Z)/…
797.47	10629.8	C40H66O12	[M+Hac-H]-	797.469	0.45	['NA']
797.47	10629.8	C44H73O8P	[M+(37Cl)]-	797.471	-1.4	['NA', 'PA(19:1(9Z)/22:6(4Z,7Z,10Z,13Z,16Z,19Z))', 'PA(22:6(4Z,7Z,10Z,13Z,16Z,19Z)/19:1(9Z))']
797.516	23568.8	0
797.554	15514.5	0
797.59	38065.8	0
797.67	35271.2	0
798.483	12574.8	C43H74NO8P	[M+Cl]-	798.485	-2.13	['PC(13:0/22:6(4Z,7Z,10Z,13Z,16Z,19Z))', 'PC(15:1(9Z)/20:5(5Z,8Z,11Z,14Z,17Z))', 'PC(17:2(9Z,12Z)/18:4(6Z,9Z,12Z,15Z))', 'PC(18:4(6Z,9Z,12Z,15Z)/17:2(9Z,12Z))', 'PC(20:5(5Z,8Z,11Z,14Z,17Z)/15:1(9Z))', 'PC(22:6(4Z,7Z,10Z,13Z,16Z,19Z)/13:0)', 'PE(16:0/22:6(4Z,7Z,10Z,13Z,16Z,19Z))', 'PE(18:1(9Z)/20:5(5Z,8Z,11Z,14Z,17Z))', 'PE(18:2(9Z,12Z)/20:4(5Z,8Z,11Z,14Z))', 'PE(18:3(6Z,9Z,12Z)/20:3(8Z,11Z,14Z))'…
798.529	73549.9	C41H74NO8P	[M+Hac-H]-	798.529	-0.39	['PC(13:0/20:4(5Z,8Z,11Z,14Z))', 'PC(15:0/18:4(6Z,9Z,12Z,15Z))', 'PC(15:1(9Z)/18:3(6Z,9Z,12Z))', 'PC(15:1(9Z)/18:3(9Z,12Z,15Z))', 'PC(18:3(6Z,9Z,12Z)/15:1(9Z))', 'PC(18:3(9Z,12Z,15Z)/15:1(9Z))', 'PC(18:4(6Z,9Z,12Z,15Z)/15:0)', 'PC(20:4(5Z,8Z,11Z,14Z)/13:0)', 'PE(14:0/22:4(7Z,10Z,13Z,16Z))', 'PE(16:0/20:4(5Z,8Z,11Z,14Z))', 'PE(16:1(9Z)/20:3(8Z,11Z,14Z))', 'PE(18:0/18:4(6Z,9Z,12Z,15Z))', 'PE(18:1(9…
798.529	73549.9	C43H78NO10P	[M-H]-	798.529	-0.39	['PS(15:1(9Z)/22:2(13Z,16Z))', 'PS(17:0/20:3(8Z,11Z,14Z))', 'PS(17:1(9Z)/20:2(11Z,14Z))', 'PS(17:2(9Z,12Z)/20:1(11Z))', 'PS(18:2(9Z,12Z)/19:1(9Z))', 'PS(18:3(6Z,9Z,12Z)/19:0)', 'PS(18:3(9Z,12Z,15Z)/19:0)', 'PS(19:0/18:3(6Z,9Z,12Z))', 'PS(19:0/18:3(9Z,12Z,15Z))', 'PS(19:1(9Z)/18:2(9Z,12Z))', 'PS(20:1(11Z)/17:2(9Z,12Z))', 'PS(20:2(11Z,14Z)/17:1(9Z))', 'PS(20:3(8Z,11Z,14Z)/17:0)', 'PS(22:2(13Z,16Z)/…
798.566	16123.4	C42H78NO7P	[M+Hac-H]-	798.565	0.62	['NA', 'PC(O-14:0/20:4(5Z,8Z,11Z,14Z))', 'PC(O-16:0/18:4(6Z,9Z,12Z,15Z))', 'PC(P-16:0/18:3(6Z,9Z,12Z))', 'PC(P-16:0/18:3(9Z,12Z,15Z))']
798.566	16123.4	C44H82NO9P	[M-H]-	798.565	0.62	['PS(O-18:0/20:3(8Z,11Z,14Z))', 'PS(O-20:0/18:3(6Z,9Z,12Z))', 'PS(O-20:0/18:3(9Z,12Z,15Z))', 'PS(P-16:0/22:2(13Z,16Z))', 'PS(P-18:0/20:2(11Z,14Z))', 'PS(P-20:0/18:2(9Z,12Z))']
798.603	21627.8	C45H86NO8P	[M-H]-	798.602	1.53	['PC(15:0/22:2(13Z,16Z))', 'PC(15:1(9Z)/22:1(11Z))', 'PC(17:0/20:2(11Z,14Z))', 'PC(17:1(9Z)/20:1(11Z))', 'PC(17:2(9Z,12Z)/20:0)', 'PC(18:1(9Z)/19:1(9Z))', 'PC(18:2(9Z,12Z)/19:0)', 'PC(19:0/18:2(9Z,12Z))', 'PC(19:1(9Z)/18:1(9Z))', 'PC(20:0/17:2(9Z,12Z))', 'PC(20:1(11Z)/17:1(9Z))', 'PC(20:2(11Z,14Z)/17:0)', 'PC(22:1(11Z)/15:1(9Z))', 'PC(22:2(13Z,16Z)/15:0)', 'PE(18:0/22:2(13Z,16Z))', 'PE(18:1(9Z)/2…
798.673	18061.5	0
799.532	32472.7	0
799.606	11495.9	0
800.527	6382.27	0
800.545	261253	C41H76NO8P	[M+Hac-H]-	800.545	0	['PC(13:0/20:3(8Z,11Z,14Z))', 'PC(15:0/18:3(6Z,9Z,12Z))', 'PC(15:0/18:3(9Z,12Z,15Z))', 'PC(15:1(9Z)/18:2(9Z,12Z))', 'PC(16:1(9Z)/17:2(9Z,12Z))', 'PC(17:2(9Z,12Z)/16:1(9Z))', 'PC(18:2(9Z,12Z)/15:1(9Z))', 'PC(18:3(6Z,9Z,12Z)/15:0)', 'PC(18:3(9Z,12Z,15Z)/15:0)', 'PC(20:3(8Z,11Z,14Z)/13:0)', 'PE(14:1(9Z)/22:2(13Z,16Z))', 'PE(16:0/20:3(8Z,11Z,14Z))', 'PE(16:1(9Z)/20:2(11Z,14Z))', 'PE(17:2(9Z,12Z)/19:1…
800.545	261253	C43H80NO10P	[M-H]-	800.545	0	['PS(15:0/22:2(13Z,16Z))', 'PS(15:1(9Z)/22:1(11Z))', 'PS(17:0/20:2(11Z,14Z))', 'PS(17:1(9Z)/20:1(11Z))', 'PS(17:2(9Z,12Z)/20:0)', 'PS(18:1(9Z)/19:1(9Z))', 'PS(18:2(9Z,12Z)/19:0)', 'PS(19:0/18:2(9Z,12Z))', 'PS(19:1(9Z)/18:1(9Z))', 'PS(20:0/17:2(9Z,12Z))', 'PS(20:1(11Z)/17:1(9Z))', 'PS(20:2(11Z,14Z)/17:0)', 'PS(22:1(11Z)/15:1(9Z))', 'PS(22:2(13Z,16Z)/15:0)']
800.581	34001.5	C42H80NO7P	[M+Hac-H]-	800.581	-0.34	['PC(O-16:0/18:3(6Z,9Z,12Z))', 'PC(O-16:0/18:3(9Z,12Z,15Z))', 'PC(P-16:0/18:2(9Z,12Z))', 'PE(P-20:0/17:2(9Z,12Z))']
800.581	34001.5	C44H84NO9P	[M-H]-	800.581	-0.34	['PS(O-16:0/22:2(13Z,16Z))', 'PS(O-18:0/20:2(11Z,14Z))', 'PS(O-20:0/18:2(9Z,12Z))', 'PS(P-16:0/22:1(11Z))', 'PS(P-18:0/20:1(11Z))', 'PS(P-20:0/18:1(9Z))']
801.532	5945.8	0
801.549	109968	0
801.585	16331.3	0
801.612	12505.7	0
802.465	36244.8	C44H70NO10P	[M-H]-	802.466	-1.83	['PS(18:3(6Z,9Z,12Z)/20:5(5Z,8Z,11Z,14Z,17Z))', 'PS(18:3(9Z,12Z,15Z)/20:5(5Z,8Z,11Z,14Z,17Z))', 'PS(18:4(6Z,9Z,12Z,15Z)/20:4(5Z,8Z,11Z,14Z))', 'PS(20:4(5Z,8Z,11Z,14Z)/18:4(6Z,9Z,12Z,15Z))', 'PS(20:5(5Z,8Z,11Z,14Z,17Z)/18:3(6Z,9Z,12Z))', 'PS(20:5(5Z,8Z,11Z,14Z,17Z)/18:3(9Z,12Z,15Z))']
802.561	143819	C41H78NO8P	[M+Hac-H]-	802.56	0.78	['PC(13:0/20:2(11Z,14Z))', 'PC(14:1(9Z)/19:1(9Z))', 'PC(15:0/18:2(9Z,12Z))', 'PC(15:1(9Z)/18:1(9Z))', 'PC(16:0/17:2(9Z,12Z))', 'PC(16:1(9Z)/17:1(9Z))', 'PC(17:1(9Z)/16:1(9Z))', 'PC(17:2(9Z,12Z)/16:0)', 'PC(18:1(9Z)/15:1(9Z))', 'PC(18:2(9Z,12Z)/15:0)', 'PC(19:1(9Z)/14:1(9Z))', 'PC(20:2(11Z,14Z)/13:0)', 'PE(14:0/22:2(13Z,16Z))', 'PE(14:1(9Z)/22:1(11Z))', 'PE(16:0/20:2(11Z,14Z))', 'PE(16:1(9Z)/20:1(…
802.561	143819	C43H82NO10P	[M-H]-	802.56	0.78	['PS(15:0/22:1(11Z))', 'PS(15:1(9Z)/22:0)', 'PS(16:1(9Z)/21:0)', 'PS(17:0/20:1(11Z))', 'PS(17:1(9Z)/20:0)', 'PS(18:0/19:1(9Z))', 'PS(18:1(9Z)/19:0)', 'PS(19:0/18:1(9Z))', 'PS(19:1(9Z)/18:0)', 'PS(20:0/17:1(9Z))', 'PS(20:1(11Z)/17:0)', 'PS(21:0/16:1(9Z))', 'PS(22:0/15:1(9Z))', 'PS(22:1(11Z)/15:0)', 'PT(18:0/18:1(9Z))']
802.597	12777.8	C42H82NO7P	[M+Hac-H]-	802.597	0.45	['PC(O-16:0/18:2(9Z,12Z))', 'PC(P-16:0/18:1(9Z))', 'PC(P-18:0/16:1(9Z))', 'PC(P-20:0/14:1(9Z))', 'PE(O-20:0/17:2(9Z,12Z))', 'PE(P-18:0/19:1(9Z))', 'PE(P-20:0/17:1(9Z))', 'PnC(16:0/18:1(9Z))']
802.597	12777.8	C44H86NO9P	[M-H]-	802.597	0.45	['PS(O-16:0/22:1(11Z))', 'PS(O-18:0/20:1(11Z))', 'PS(O-20:0/18:1(9Z))', 'PS(P-16:0/22:0)', 'PS(P-18:0/20:0)', 'PS(P-20:0/18:0)']
802.597	12777.8	C45H85NO8	[M+Cl]-	802.597	0.24	['GalCer(d18:2/21:0)', 'GlcCer(d18:2/21:0)']
803.471	57993.3	C41H73O13P	[M-H]-	803.472	-0.23	['PI(12:0/20:3(8Z,11Z,14Z))', 'PI(14:0/18:3(6Z,9Z,12Z))', 'PI(14:0/18:3(9Z,12Z,15Z))', 'PI(14:1(9Z)/18:2(9Z,12Z))', 'PI(15:1(9Z)/17:2(9Z,12Z))', 'PI(17:2(9Z,12Z)/15:1(9Z))', 'PI(18:2(9Z,12Z)/14:1(9Z))', 'PI(18:3(6Z,9Z,12Z)/14:0)', 'PI(18:3(9Z,12Z,15Z)/14:0)', 'PI(20:3(8Z,11Z,14Z)/12:0)']
803.471	57993.3	C46H64O8	[M+Hac-H]-	803.474	-3.18	['19-Butanoyloxyfucoxanthin', 'Adonixanthin 3-beta-D-glucoside/ Adonixanthin 3-glucoside', 'Adonixanthin 3-glucoside']
803.564	66775.8	0
803.628	41566	C42H85N2O6P	[M+Hac-H]-	803.628	-0.05	['SM(d18:1/19:0)', 'SM(d19:1/18:0)']
804.48	62825.5	C44H72NO10P	[M-H]-	804.482	-2.57	['PS(16:1(9Z)/22:6(4Z,7Z,10Z,13Z,16Z,19Z))', 'PS(18:2(9Z,12Z)/20:5(5Z,8Z,11Z,14Z,17Z))', 'PS(18:3(6Z,9Z,12Z)/20:4(5Z,8Z,11Z,14Z))', 'PS(18:3(9Z,12Z,15Z)/20:4(5Z,8Z,11Z,14Z))', 'PS(18:4(6Z,9Z,12Z,15Z)/20:3(8Z,11Z,14Z))', 'PS(20:3(8Z,11Z,14Z)/18:4(6Z,9Z,12Z,15Z))', 'PS(20:4(5Z,8Z,11Z,14Z)/18:3(6Z,9Z,12Z))', 'PS(20:4(5Z,8Z,11Z,14Z)/18:3(9Z,12Z,15Z))', 'PS(20:5(5Z,8Z,11Z,14Z,17Z)/18:2(9Z,12Z))', 'PS(…
804.576	160227	C41H80NO8P	[M+Hac-H]-	804.576	0.33	['PC(13:0/20:1(11Z))', 'PC(14:0/19:1(9Z))', 'PC(14:1(9Z)/19:0)', 'PC(15:0/18:1(11Z))', 'PC(15:0/18:1(9Z))', 'PC(15:1(9Z)/18:0)', 'PC(16:0/17:1(9Z))', 'PC(16:1(9Z)/17:0)', 'PC(17:0/16:1(9Z))', 'PC(17:1(9Z)/16:0)', 'PC(18:0/15:1(9Z))', 'PC(18:1(9Z)/15:0)', 'PC(19:0/14:1(9Z))', 'PC(19:1(9Z)/14:0)', 'PC(20:1(11Z)/13:0)', 'PE(14:0/22:1(11Z))', 'PE(14:1(9Z)/22:0)', 'PE(15:1(9Z)/21:0)', 'PE(16:0/20:1(11…
804.576	160227	C43H84NO10P	[M-H]-	804.576	0.33	['PS(15:0/22:0)', 'PS(16:0/21:0)', 'PS(17:0/20:0)', 'PS(18:0/19:0)', 'PS(19:0/18:0)', 'PS(20:0/17:0)', 'PS(21:0/16:0)', 'PS(22:0/15:0)']
804.613	14080.7	C42H84NO7P	[M+Hac-H]-	804.612	0.22	['PC(O-16:0/18:1(9Z))', 'PC(O-18:0/16:1(9Z))', 'PC(O-20:0/14:1(9Z))', 'PC(P-16:0/18:0)', 'PC(P-18:0/16:0)', 'PC(P-20:0/14:0)', 'PC(o-18:1(9Z)/16:0)', 'PE(O-18:0/19:1(9Z))', 'PE(O-20:0/17:1(9Z))', 'PE(P-16:0/21:0)', 'PE(P-18:0/19:0)', 'PE(P-20:0/17:0)']
804.613	14080.7	C44H88NO9P	[M-H]-	804.612	0.22	['PS(O-16:0/22:0)', 'PS(O-18:0/20:0)', 'PS(O-20:0/18:0)']
804.613	14080.7	C45H87NO8	[M+Cl]-	804.613	0	['GalCer(d16:1/23:0)', 'GlcCer(d16:1/23:0)']
804.632	19244.7	0
805.58	72024.3	0
806.534	76021.1	C43H74NO7P	[M+Hac-H]-	806.534	-0.39	['PE(O-16:1(1Z)/22:6(4Z,7Z,10Z,13Z,16Z,19Z))']
806.534	76021.1	C45H78NO9P	[M-H]-	806.534	-0.39	['PE(18:0/22:6(4Z,7Z,10Z,12E,16Z,19Z)(14OH))']
807.537	38562.8	C40H77O10P	[M+Hac-H]-	807.539	-2.75	['LBPA(16:0/18:1(9Z))', 'PG(12:0/22:1(11Z))', 'PG(14:0/20:1(11Z))', 'PG(14:1(9Z)/20:0)', 'PG(15:0/19:1(9Z))', 'PG(15:1(9Z)/19:0)', 'PG(16:0/18:1(11Z))', 'PG(16:0/18:1(9Z))', 'PG(16:1(9Z)/18:0)', 'PG(17:0/17:1(9Z))', 'PG(17:1(9Z)/17:0)', 'PG(18:0/16:1(9Z))', 'PG(18:1(9Z)/16:0)', 'PG(19:0/15:1(9Z))', 'PG(19:1(9Z)/15:0)', 'PG(20:0/14:1(9Z))', 'PG(20:1(11Z)/14:0)', 'PG(22:1(11Z)/12:0)']
807.537	38562.8	C42H81O12P	[M-H]-	807.539	-2.75	['PI(O-16:0/17:1(9Z))', 'PI(O-18:0/15:1(9Z))', 'PI(P-16:0/17:0)', 'PI(P-18:0/15:0)', 'PI(P-20:0/13:0)']
808.513	186220	C42H72NO8P	[M+Hac-H]-	808.513	-0.61	['PC(12:0/22:6(4Z,7Z,10Z,13Z,16Z,19Z))', 'PC(14:1(9Z)/20:5(5Z,8Z,11Z,14Z,17Z))', 'PC(20:5(5Z,8Z,11Z,14Z,17Z)/14:1(9Z))', 'PC(22:6(4Z,7Z,10Z,13Z,16Z,19Z)/12:0)', 'PE(15:0/22:6(4Z,7Z,10Z,13Z,16Z,19Z))', 'PE(17:1(9Z)/20:5(5Z,8Z,11Z,14Z,17Z))', 'PE(17:2(9Z,12Z)/20:4(5Z,8Z,11Z,14Z))', 'PE(20:4(5Z,8Z,11Z,14Z)/17:2(9Z,12Z))', 'PE(20:5(5Z,8Z,11Z,14Z,17Z)/17:1(9Z))', 'PE(22:6(4Z,7Z,10Z,13Z,16Z,19Z)/15:0)']
808.513	186220	C44H76NO10P	[M-H]-	808.513	-0.61	['PS(16:1(9Z)/22:4(7Z,10Z,13Z,16Z))', 'PS(18:0/20:5(5Z,8Z,11Z,14Z,17Z))', 'PS(18:1(9Z)/20:4(5Z,8Z,11Z,14Z))', 'PS(18:2(9Z,12Z)/20:3(8Z,11Z,14Z))', 'PS(18:3(6Z,9Z,12Z)/20:2(11Z,14Z))', 'PS(18:3(9Z,12Z,15Z)/20:2(11Z,14Z))', 'PS(18:4(6Z,9Z,12Z,15Z)/20:1(11Z))', 'PS(20:1(11Z)/18:4(6Z,9Z,12Z,15Z))', 'PS(20:2(11Z,14Z)/18:3(6Z,9Z,12Z))', 'PS(20:2(11Z,14Z)/18:3(9Z,12Z,15Z))', 'PS(20:3(8Z,11Z,14Z)/18:2(9Z…
808.55	62351.2	C43H76NO7P	[M+Hac-H]-	808.55	-0.06	['PE(O-16:0/22:6(4Z,7Z,10Z,13Z,16Z,19Z))', 'PE(P-18:0/20:5(5Z,8Z,11Z,14Z,17Z))']
808.55	62351.2	C46H79NO8	[M+Cl]-	808.55	-0.27	['DGCC(16:0/20:5)']
809.516	91811.5	C41H79O13P	[M-H]-	809.519	-2.57	['PI(12:0/20:0)', 'PI(13:0/19:0)', 'PI(14:0/18:0)', 'PI(15:0/17:0)', 'PI(16:0/16:0)', 'PI(17:0/15:0)', 'PI(18:0/14:0)', 'PI(19:0/13:0)', 'PI(20:0/12:0)']
809.553	32421.9	C40H79O10P	[M+Hac-H]-	809.555	-2.25	['PG(12:0/22:0)', 'PG(13:0/21:0)', 'PG(14:0/20:0)', 'PG(15:0/19:0)', 'PG(16:0/18:0)', 'PG(17:0/17:0)', 'PG(18:0/16:0)', 'PG(19:0/15:0)', 'PG(20:0/14:0)', 'PG(21:0/13:0)', 'PG(22:0/12:0)']
809.553	32421.9	C42H83O12P	[M-H]-	809.555	-2.25	['PI(O-16:0/17:0)', 'PI(O-18:0/15:0)', 'PI(O-20:0/13:0)']
809.633	53337.1	0
810.512	5579.62	0
810.529	134702	C42H74NO8P	[M+Hac-H]-	810.529	0.32	['PC(14:0/20:5(5Z,8Z,11Z,14Z,17Z))', 'PC(14:1(9Z)/20:4(5Z,8Z,11Z,14Z))', 'PC(16:1(9Z)/18:4(6Z,9Z,12Z,15Z))', 'PC(18:4(6Z,9Z,12Z,15Z)/16:1(9Z))', 'PC(20:4(5Z,8Z,11Z,14Z)/14:1(9Z))', 'PC(20:5(5Z,8Z,11Z,14Z,17Z)/14:0)', 'PE(15:1(9Z)/22:4(7Z,10Z,13Z,16Z))', 'PE(17:0/20:5(5Z,8Z,11Z,14Z,17Z))', 'PE(17:1(9Z)/20:4(5Z,8Z,11Z,14Z))', 'PE(17:2(9Z,12Z)/20:3(8Z,11Z,14Z))', 'PE(18:4(6Z,9Z,12Z,15Z)/19:1(9Z))', …
810.529	134702	C44H78NO10P	[M-H]-	810.529	0.32	['PS(16:0/22:4(7Z,10Z,13Z,16Z))', 'PS(18:0/20:4(5Z,8Z,11Z,14Z))', 'PS(18:1(9Z)/20:3(8Z,11Z,14Z))', 'PS(18:2(9Z,12Z)/20:2(11Z,14Z))', 'PS(18:3(6Z,9Z,12Z)/20:1(11Z))', 'PS(18:3(9Z,12Z,15Z)/20:1(11Z))', 'PS(18:4(6Z,9Z,12Z,15Z)/20:0)', 'PS(20:0/18:4(6Z,9Z,12Z,15Z))', 'PS(20:1(11Z)/18:3(6Z,9Z,12Z))', 'PS(20:1(11Z)/18:3(9Z,12Z,15Z))', 'PS(20:2(11Z,14Z)/18:2(9Z,12Z))', 'PS(20:3(8Z,11Z,14Z)/18:1(9Z))', '…
810.566	100109	C43H78NO7P	[M+Hac-H]-	810.565	0.28	['PE(O-16:0/22:5(4Z,7Z,10Z,13Z,16Z))', 'PE(O-16:0/22:5(7Z,10Z,13Z,16Z,19Z))', 'PE(O-18:0/20:5(5Z,8Z,11Z,14Z,17Z))', 'PE(O-18:1(1Z)/20:4(5Z,8Z,11Z,14Z))', 'PE(P-16:0/22:4(7Z,10Z,13Z,16Z))', 'PE(P-20:0/18:4(6Z,9Z,12Z,15Z))']
810.637	29021.2	C47H90NO7P	[M-H]-	810.638	-1.73	['PE(P-20:0/22:2(13Z,16Z))']
811.533	69261.6	0
811.569	51814.1	0
811.651	11957.6	0
812.5	42315.9	C41H78NO10P	[M+(37Cl)]-	812.503	-3.31	['PS(13:0/22:1(11Z))', 'PS(14:1(9Z)/21:0)', 'PS(15:0/20:1(11Z))', 'PS(15:1(9Z)/20:0)', 'PS(16:0/19:1(9Z))', 'PS(16:1(9Z)/19:0)', 'PS(17:0/18:1(9Z))', 'PS(17:1(9Z)/18:0)', 'PS(18:0/17:1(9Z))', 'PS(18:1(9Z)/17:0)', 'PS(19:0/16:1(9Z))', 'PS(19:1(9Z)/16:0)', 'PS(20:0/15:1(9Z))', 'PS(20:1(11Z)/15:0)', 'PS(21:0/14:1(9Z))', 'PS(22:1(11Z)/13:0)']
812.5	42315.9	C44H76NO8P	[M+Cl]-	812.5	-0.2	['PC(14:0/22:6(4Z,7Z,10Z,13Z,16Z,19Z))', 'PC(16:1(9Z)/20:5(5Z,8Z,11Z,14Z,17Z))', 'PC(18:2(9Z,12Z)/18:4(6Z,9Z,12Z,15Z))', 'PC(18:3(6Z,9Z,12Z)/18:3(6Z,9Z,12Z))', 'PC(18:3(6Z,9Z,12Z)/18:3(9Z,12Z,15Z))', 'PC(18:3(9E,11E,13E)/18:3(9E,11E,13E))', 'PC(18:3(9Z,11E,13E)/18:3(9Z,11E,13E))', 'PC(18:3(9Z,12Z,15Z)/18:3(6Z,9Z,12Z))', 'PC(18:3(9Z,12Z,15Z)/18:3(9Z,12Z,15Z))', 'PC(18:4(6Z,9Z,12Z,15Z)/18:2(9Z,12Z)…
812.545	316383	C42H76NO8P	[M+Hac-H]-	812.545	0.04	['PC(12:0/22:4(7Z,10Z,13Z,16Z))', 'PC(14:0/20:4(5Z,8Z,11Z,14Z))', 'PC(14:1(9Z)/20:3(8Z,11Z,14Z))', 'PC(16:0/18:4(6Z,9Z,12Z,15Z))', 'PC(16:0/18:4(9E,11E,13E,15E))', 'PC(16:0/18:4(9Z,11E,13E,15Z))', 'PC(16:0/18:4(9Z,11Z,13Z,15Z))', 'PC(16:1(9Z)/18:3(6Z,9Z,12Z))', 'PC(16:1(9Z)/18:3(9Z,12Z,15Z))', 'PC(16:2(2E,4E)/18:2(2E,4E))', 'PC(17:2(9Z,12Z)/17:2(9Z,12Z))', 'PC(18:3(6Z,9Z,12Z)/16:1(9Z))', 'PC(18:3…
812.545	316383	C44H80NO10P	[M-H]-	812.545	0.04	['PS(16:1(9Z)/22:2(13Z,16Z))', 'PS(18:0/20:3(8Z,11Z,14Z))', 'PS(18:1(9Z)/20:2(11Z,14Z))', 'PS(18:2(9Z,12Z)/20:1(11Z))', 'PS(18:3(6Z,9Z,12Z)/20:0)', 'PS(18:3(9Z,12Z,15Z)/20:0)', 'PS(20:0/18:3(6Z,9Z,12Z))', 'PS(20:0/18:3(9Z,12Z,15Z))', 'PS(20:1(11Z)/18:2(9Z,12Z))', 'PS(20:2(11Z,14Z)/18:1(9Z))', 'PS(20:3(8Z,11Z,14Z)/18:0)', 'PS(22:2(13Z,16Z)/16:1(9Z))']
812.566	5573.33	0
812.582	17499.3	C43H80NO7P	[M+Hac-H]-	812.581	1.59	['PC(O-15:0/20:4(5Z,8Z,11Z,14Z))', 'PE(O-16:0/22:4(7Z,10Z,13Z,16Z))', 'PE(O-18:0/20:4(5Z,8Z,11Z,14Z))', 'PE(O-20:0/18:4(6Z,9Z,12Z,15Z))', 'PE(P-18:0/20:3(8Z,11Z,14Z))', 'PE(P-20:0/18:3(6Z,9Z,12Z))', 'PE(P-20:0/18:3(9Z,12Z,15Z))']
812.653	7615.33	C47H92NO7P	[M-H]-	812.654	-1.3	['PC(P-20:0/19:1(9Z))', 'PE(O-20:0/22:2(13Z,16Z))', 'PE(P-20:0/22:1(11Z))']
813.503	19342.3	C45H77O8P	[M+(37Cl)]-	813.502	1.18	['PA(20:0/22:6(4Z,7Z,10Z,13Z,16Z,19Z))', 'PA(20:2(11Z,14Z)/22:4(7Z,10Z,13Z,16Z))', 'PA(20:4(5Z,8Z,11Z,14Z)/22:2(13Z,16Z))', 'PA(20:5(5Z,8Z,11Z,14Z,17Z)/22:1(11Z))', 'PA(22:1(11Z)/20:5(5Z,8Z,11Z,14Z,17Z))', 'PA(22:2(13Z,16Z)/20:4(5Z,8Z,11Z,14Z))', 'PA(22:4(7Z,10Z,13Z,16Z)/20:2(11Z,14Z))', 'PA(22:6(4Z,7Z,10Z,13Z,16Z,19Z)/20:0)']
813.548	153261	0
813.585	11632.8	0
813.665	32128.8	0
814.5	14415.3	C44H76NO8P	[M+(37Cl)]-	814.497	2.85	['PC(14:0/22:6(4Z,7Z,10Z,13Z,16Z,19Z))', 'PC(16:1(9Z)/20:5(5Z,8Z,11Z,14Z,17Z))', 'PC(18:2(9Z,12Z)/18:4(6Z,9Z,12Z,15Z))', 'PC(18:3(6Z,9Z,12Z)/18:3(6Z,9Z,12Z))', 'PC(18:3(6Z,9Z,12Z)/18:3(9Z,12Z,15Z))', 'PC(18:3(9E,11E,13E)/18:3(9E,11E,13E))', 'PC(18:3(9Z,11E,13E)/18:3(9Z,11E,13E))', 'PC(18:3(9Z,12Z,15Z)/18:3(6Z,9Z,12Z))', 'PC(18:3(9Z,12Z,15Z)/18:3(9Z,12Z,15Z))', 'PC(18:4(6Z,9Z,12Z,15Z)/18:2(9Z,12Z)…
814.517	52906	C41H80NO10P	[M+(37Cl)]-	814.518	-2.2	['PS(13:0/22:0)', 'PS(14:0/21:0)', 'PS(15:0/20:0)', 'PS(16:0/19:0)', 'PS(17:0/18:0)', 'PS(18:0/17:0)', 'PS(19:0/16:0)', 'PS(20:0/15:0)', 'PS(21:0/14:0)', 'PS(22:0/13:0)']
814.517	52906	C44H78NO8P	[M+Cl]-	814.516	0.91	['PC(14:1(9Z)/22:4(7Z,10Z,13Z,16Z))', 'PC(16:0/20:5(5Z,8Z,11Z,14Z,17Z))', 'PC(16:1(7Z)/20:4(5Z,8Z,11Z,14Z))', 'PC(16:1(9Z)/20:4(5Z,8Z,11Z,14Z))', 'PC(18:1(9Z)/18:4(6Z,9Z,12Z,15Z))', 'PC(18:2(9Z,12Z)/18:3(6Z,9Z,12Z))', 'PC(18:2(9Z,12Z)/18:3(9Z,12Z,15Z))', 'PC(18:3(6Z,9Z,12Z)/18:2(9Z,12Z))', 'PC(18:3(9Z,12Z,15Z)/18:2(9Z,12Z))', 'PC(18:4(6Z,9Z,12Z,15Z)/18:1(9Z))', 'PC(20:4(5Z,8Z,11Z,14Z)/16:1(9Z))',…
814.533	9108.19	C45H80NO7P	[M+(37Cl)]-	814.534	-1.44	['PE(O-18:0/22:6(4Z,7Z,10Z,13Z,16Z,19Z))', 'PE(P-20:0/20:5(5Z,8Z,11Z,14Z,17Z))']
814.56	1.43074e+06	C42H78NO8P	[M+Hac-H]-	814.56	-0.52	['PC(14:0/20:3(8Z,11Z,14Z))', 'PC(14:1(9Z)/20:2(11Z,14Z))', 'PC(16:0/18:3(6Z,9Z,12Z))', 'PC(16:0/18:3(9Z,12Z,15Z))', 'PC(16:1(9Z)/18:2(9Z,12Z))', 'PC(17:1(9Z)/17:2(9Z,12Z))', 'PC(17:2(9Z,12Z)/17:1(9Z))', 'PC(18:2(9Z,12Z)/16:1(9Z))', 'PC(18:3(6Z,9Z,12Z)/16:0)', 'PC(18:3(9Z,12Z,15Z)/16:0)', 'PC(20:2(11Z,14Z)/14:1(9Z))', 'PC(20:3(8Z,11Z,14Z)/14:0)', 'PE(15:1(9Z)/22:2(13Z,16Z))', 'PE(17:0/20:3(8Z,11Z…
814.56	1.43074e+06	C44H82NO10P	[M-H]-	814.56	-0.52	['PS(16:0/22:2(13Z,16Z))', 'PS(16:1(9Z)/22:1(11Z))', 'PS(17:2(9Z,12Z)/21:0)', 'PS(18:0/20:2(11Z,14Z))', 'PS(18:1(9Z)/20:1(11Z))', 'PS(18:2(9Z,12Z)/20:0)', 'PS(19:1(9Z)/19:1(9Z))', 'PS(20:0/18:2(9Z,12Z))', 'PS(20:1(11Z)/18:1(9Z))', 'PS(20:2(11Z,14Z)/18:0)', 'PS(21:0/17:2(9Z,12Z))', 'PS(22:1(11Z)/16:1(9Z))', 'PS(22:2(13Z,16Z)/16:0)']
814.579	13705.2	0
814.587	4340.08	0
814.668	18051.4	C47H94NO7P	[M-H]-	814.67	-1.93	['PC(O-20:0/19:1(9Z))', 'PC(P-18:0/21:0)', 'PC(P-20:0/19:0)', 'PE(O-20:0/22:1(11Z))', 'PE(P-20:0/22:0)']
815.52	28077.9	C45H79O8P	[M+(37Cl)]-	815.518	2.5	['PA(20:1(11Z)/22:4(7Z,10Z,13Z,16Z))', 'PA(20:3(8Z,11Z,14Z)/22:2(13Z,16Z))', 'PA(20:4(5Z,8Z,11Z,14Z)/22:1(11Z))', 'PA(20:5(5Z,8Z,11Z,14Z,17Z)/22:0)', 'PA(22:0/20:5(5Z,8Z,11Z,14Z,17Z))', 'PA(22:1(11Z)/20:4(5Z,8Z,11Z,14Z))', 'PA(22:2(13Z,16Z)/20:3(8Z,11Z,14Z))', 'PA(22:4(7Z,10Z,13Z,16Z)/20:1(11Z))']
815.564	681490	0
815.628	59718.7	C43H85N2O6P	[M+Hac-H]-	815.628	-0.18	['SM(d16:1/22:1)', 'SM(d18:1/20:1)', 'SM(d18:2/20:0)']
816.48	108604	C43H68NO8P	[M+Hac-H]-	816.482	-2.7	['PE(18:4(6Z,9Z,12Z,15Z)/20:5(5Z,8Z,11Z,14Z,17Z))', 'PE(20:5(5Z,8Z,11Z,14Z,17Z)/18:4(6Z,9Z,12Z,15Z))']
816.48	108604	C45H72NO10P	[M-H]-	816.482	-2.7	['PS(17:2(9Z,12Z)/22:6(4Z,7Z,10Z,13Z,16Z,19Z))', 'PS(22:6(4Z,7Z,10Z,13Z,16Z,19Z)/17:2(9Z,12Z))']
816.532	58603.3	C44H80NO8P	[M+Cl]-	816.532	0.23	['PC(14:0/22:4(7Z,10Z,13Z,16Z))', 'PC(16:0/20:4(5E,8E,11E,14E))', 'PC(16:0/20:4(5Z,8Z,11Z,14Z))', 'PC(16:1(9Z)/20:3(8Z,11Z,14Z))', 'PC(18:0/18:4(6Z,9Z,12Z,15Z))', 'PC(18:0/18:4(9E,11E,13E,15E))', 'PC(18:1(9Z)/18:3(6Z,9Z,12Z))', 'PC(18:1(9Z)/18:3(9Z,12Z,15Z))', 'PC(18:2(2E,4E)/18:2(2E,4E))', 'PC(18:2(2Z,4Z)/18:2(2Z,4Z))', 'PC(18:2(6Z,9Z)/18:2(6Z,9Z))', 'PC(18:2(9Z,11Z)/18:2(9Z,11Z))', 'PC(18:2(9Z,…
816.548	7296.62	C45H82NO7P	[M+(37Cl)]-	816.549	-1.28	['PE(O-20:0/20:5(5Z,8Z,11Z,14Z,17Z))', 'PE(P-18:0/22:4(7Z,10Z,13Z,16Z))', 'PE(P-20:0/20:4(5Z,8Z,11Z,14Z))']
816.576	739847	C42H80NO8P	[M+Hac-H]-	816.576	0.02	['PC(12:0/22:2(13Z,16Z))', 'PC(14:0/20:2(11Z,14Z))', 'PC(14:1(9Z)/20:1(11Z))', 'PC(15:1(9Z)/19:1(9Z))', 'PC(16:0/18:2(10E,12Z))', 'PC(16:0/18:2(11Z,13Z))', 'PC(16:0/18:2(2E,4E))', 'PC(16:0/18:2(2Z,4Z))', 'PC(16:0/18:2(6Z,9Z))', 'PC(16:0/18:2(9E,11E))', 'PC(16:0/18:2(9E,11Z))', 'PC(16:0/18:2(9E,12E))', 'PC(16:0/18:2(9Z,12Z))', 'PC(16:1(2Z)/18:1(9Z))', 'PC(16:1(9Z)/18:1(11Z))', 'PC(16:1(9Z)/18:1(9Z…
816.576	739847	C44H84NO10P	[M-H]-	816.576	0.02	['PS(16:0/22:1(11Z))', 'PS(16:1(9Z)/22:0)', 'PS(17:1(9Z)/21:0)', 'PS(18:0/20:1(11Z))', 'PS(18:1(9Z)/20:0)', 'PS(19:0/19:1(9Z))', 'PS(19:1(9Z)/19:0)', 'PS(20:0/18:1(9Z))', 'PS(20:1(11Z)/18:0)', 'PS(21:0/17:1(9Z))', 'PS(22:0/16:1(9Z))', 'PS(22:1(11Z)/16:0)']
816.595	8437.27	0
816.631	28881.2	0
817.483	54655.7	C40H77O12P	[M+(37Cl)]-	817.482	1.97	['PI(O-16:0/15:1(9Z))', 'PI(P-16:0/15:0)', 'PI(P-18:0/13:0)']
817.535	36288.2	C45H81O8P	[M+(37Cl)]-	817.533	1.9	['PA(20:0/22:4(7Z,10Z,13Z,16Z))', 'PA(20:2(11Z,14Z)/22:2(13Z,16Z))', 'PA(20:3(8Z,11Z,14Z)/22:1(11Z))', 'PA(20:4(5Z,8Z,11Z,14Z)/22:0)', 'PA(22:0/20:4(5Z,8Z,11Z,14Z))', 'PA(22:1(11Z)/20:3(8Z,11Z,14Z))', 'PA(22:2(13Z,16Z)/20:2(11Z,14Z))', 'PA(22:4(7Z,10Z,13Z,16Z)/20:0)']
817.535	36288.2	C52H76O5	[M+(37Cl)]-	817.536	-1	['Siphonaxanthin ester/ Siphonaxanthin dodecenoate/ (Siphonein)']
817.552	1706.23	C45H83O8P	[M+Cl]-	817.552	-0.21	['PA(20:1(11Z)/22:2(13Z,16Z))', 'PA(20:2(11Z,14Z)/22:1(11Z))', 'PA(20:3(8Z,11Z,14Z)/22:0)', 'PA(22:0/20:3(8Z,11Z,14Z))', 'PA(22:1(11Z)/20:2(11Z,14Z))', 'PA(22:2(13Z,16Z)/20:1(11Z))']
839.544	12483.7	C44H77O9P	[M+Hac-H]-	839.544	-0.72	['PG(O-16:0/22:6(4Z,7Z,10Z,13Z,16Z,19Z))', 'PG(P-18:0/20:5(5Z,8Z,11Z,14Z,17Z))']
817.561	10215.7	C45H82O10	[M+Cl]-	817.56	0.93	['MGDG(18:0(9Z)/18:2(9Z,12Z))', 'MGDG(18:1(9Z)/18:1(9Z))']
817.579	387963	0
817.625	3218.14	0
817.644	178422	C43H87N2O6P	[M+Hac-H]-	817.644	-0.21	['SM(d16:1/22:0)', 'SM(d18:1/20:0)']
818.477	4167.32	C42H74NO10P	[M+Cl]-	818.474	3.5	['PS(14:0/22:4(7Z,10Z,13Z,16Z))', 'PS(16:0/20:4(5Z,8Z,11Z,14Z))', 'PS(16:1(9Z)/20:3(8Z,11Z,14Z))', 'PS(18:0/18:4(6Z,9Z,12Z,15Z))', 'PS(18:1(9Z)/18:3(6Z,9Z,12Z))', 'PS(18:1(9Z)/18:3(9Z,12Z,15Z))', 'PS(18:2(9Z,12Z)/18:2(9Z,12Z))', 'PS(18:3(6Z,9Z,12Z)/18:1(9Z))', 'PS(18:3(9Z,12Z,15Z)/18:1(9Z))', 'PS(18:4(6Z,9Z,12Z,15Z)/18:0)', 'PS(20:3(8Z,11Z,14Z)/16:1(9Z))', 'PS(20:4(5Z,8Z,11Z,14Z)/16:0)', 'PS(22:4…
818.496	148819	C43H70NO8P	[M+Hac-H]-	818.498	-1.87	['PE(18:3(6Z,9Z,12Z)/20:5(5Z,8Z,11Z,14Z,17Z))', 'PE(18:3(9Z,12Z,15Z)/20:5(5Z,8Z,11Z,14Z,17Z))', 'PE(18:4(6Z,9Z,12Z,15Z)/20:4(5Z,8Z,11Z,14Z))', 'PE(20:4(5Z,8Z,11Z,14Z)/18:4(6Z,9Z,12Z,15Z))', 'PE(20:5(5Z,8Z,11Z,14Z,17Z)/18:3(6Z,9Z,12Z))', 'PE(20:5(5Z,8Z,11Z,14Z,17Z)/18:3(9Z,12Z,15Z))']
818.496	148819	C45H74NO10P	[M-H]-	818.498	-1.87	['PS(17:1(9Z)/22:6(4Z,7Z,10Z,13Z,16Z,19Z))', 'PS(22:6(4Z,7Z,10Z,13Z,16Z,19Z)/17:1(9Z))']
818.548	34806.2	C44H82NO8P	[M+Cl]-	818.547	1.28	['PC(14:1(9Z)/22:2(13Z,16Z))', 'PC(16:0/20:3(5Z,8Z,11Z))', 'PC(16:0/20:3(8E,11E,14E))', 'PC(16:0/20:3(8Z,11Z,14Z))', 'PC(16:1(9Z)/20:2(11Z,14Z))', 'PC(17:2(9Z,12Z)/19:1(9Z))', 'PC(18:0/18:3(6Z,9Z,12Z))', 'PC(18:0/18:3(9Z,12Z,15Z))', 'PC(18:1(9Z)/18:2(6Z,9Z))', 'PC(18:1(9Z)/18:2(9Z,12Z))', 'PC(18:2(9Z,12Z)/18:1(9Z))', 'PC(18:3(6Z,9Z,12Z)/18:0)', 'PC(18:3(9Z,12Z,15Z)/18:0)', 'PC(19:1(9Z)/17:2(9Z,12…
818.574	23248.7	0
818.592	632360	C42H82NO8P	[M+Hac-H]-	818.592	0.33	['PC(12:0/22:1(11Z))', 'PC(14:0/20:1(11Z))', 'PC(14:1(9Z)/20:0)', 'PC(15:0/19:1(9Z))', 'PC(15:1(9Z)/19:0)', 'PC(16:0/18:1(11E))', 'PC(16:0/18:1(11Z))', 'PC(16:0/18:1(6E))', 'PC(16:0/18:1(6Z))', 'PC(16:0/18:1(9E))', 'PC(16:0/18:1(9Z))', 'PC(16:1(9Z)/18:0)', 'PC(17:0/17:1(9Z))', 'PC(17:1(9Z)/17:0)', 'PC(18:0/16:1(9Z))', 'PC(18:1(9Z)/16:0)', 'PC(19:0/15:1(9Z))', 'PC(19:1(9Z)/15:0)', 'PC(20:0/14:1(9Z…
818.592	632360	C44H86NO10P	[M-H]-	818.592	0.33	['PS(16:0/22:0)', 'PS(17:0/21:0)', 'PS(18:0/20:0)', 'PS(19:0/19:0)', 'PS(20:0/18:0)', 'PS(21:0/17:0)', 'PS(22:0/16:0)']
818.609	7899.43	C46H87NO8	[M+(37Cl)]-	818.61	-0.29	['GalCer(d18:2/22:0)', 'GlcCer(d18:2/22:0)']
818.609	7899.43	C48H86NO7P	[M-H]-	818.607	3.01	['PC(P-20:0/20:5(5Z,8Z,11Z,14Z,17Z))', 'PC(o-18:0/22:6(4Z,7Z,10Z,13Z,16Z,19Z))']
818.647	87077.4	0
819.499	73440.5	C40H79O12P	[M+(37Cl)]-	819.497	2.39	['PI(O-16:0/15:0)', 'PI(O-18:0/13:0)']
819.551	23066.4	C45H83O8P	[M+(37Cl)]-	819.549	2.18	['PA(20:1(11Z)/22:2(13Z,16Z))', 'PA(20:2(11Z,14Z)/22:1(11Z))', 'PA(20:3(8Z,11Z,14Z)/22:0)', 'PA(22:0/20:3(8Z,11Z,14Z))', 'PA(22:1(11Z)/20:2(11Z,14Z))', 'PA(22:2(13Z,16Z)/20:1(11Z))']
819.595	328219	C45H87N2O6P	[M+(37Cl)]-	819.597	-1.57	['SM(d18:2/22:1)']
819.652	20958.4	C53H88O6	[M-H]-	819.651	1.17	['TG(12:0/16:1(9Z)/22:6(4Z,7Z,10Z,13Z,16Z,19Z))[iso6]', 'TG(12:0/18:2(9Z,12Z)/20:5(5Z,8Z,11Z,14Z,17Z))[iso6]', 'TG(12:0/18:3(6Z,9Z,12Z)/20:4(5Z,8Z,11Z,14Z))[iso6]', 'TG(12:0/18:3(9Z,12Z,15Z)/20:4(5Z,8Z,11Z,14Z))[iso6]', 'TG(12:0/18:4(6Z,9Z,12Z,15Z)/20:3(8Z,11Z,14Z))[iso6]', 'TG(13:0/15:1(9Z)/22:6(4Z,7Z,10Z,13Z,16Z,19Z))[iso6]', 'TG(13:0/17:2(9Z,12Z)/20:5(5Z,8Z,11Z,14Z,17Z))[iso6]', 'TG(14:0/14:1(…
820.492	5741.19	C42H76NO10P	[M+Cl]-	820.49	2.8	['PS(14:1(9Z)/22:2(13Z,16Z))', 'PS(16:0/20:3(8Z,11Z,14Z))', 'PS(16:1(9Z)/20:2(11Z,14Z))', 'PS(17:2(9Z,12Z)/19:1(9Z))', 'PS(18:0/18:3(6Z,9Z,12Z))', 'PS(18:0/18:3(9Z,12Z,15Z))', 'PS(18:1(9Z)/18:2(9Z,12Z))', 'PS(18:2(9Z,12Z)/18:1(9Z))', 'PS(18:3(6Z,9Z,12Z)/18:0)', 'PS(18:3(9Z,12Z,15Z)/18:0)', 'PS(19:1(9Z)/17:2(9Z,12Z))', 'PS(20:2(11Z,14Z)/16:1(9Z))', 'PS(20:3(8Z,11Z,14Z)/16:0)', 'PS(22:2(13Z,16Z)/14…
820.511	256309	C43H72NO8P	[M+Hac-H]-	820.513	-2.68	['PE(16:1(9Z)/22:6(4Z,7Z,10Z,13Z,16Z,19Z))', 'PE(18:2(9Z,12Z)/20:5(5Z,8Z,11Z,14Z,17Z))', 'PE(18:3(6Z,9Z,12Z)/20:4(5Z,8Z,11Z,14Z))', 'PE(18:3(9Z,12Z,15Z)/20:4(5Z,8Z,11Z,14Z))', 'PE(18:4(6Z,9Z,12Z,15Z)/20:3(8Z,11Z,14Z))', 'PE(20:3(8Z,11Z,14Z)/18:4(6Z,9Z,12Z,15Z))', 'PE(20:4(5Z,8Z,11Z,14Z)/18:3(6Z,9Z,12Z))', 'PE(20:4(5Z,8Z,11Z,14Z)/18:3(9Z,12Z,15Z))', 'PE(20:5(5Z,8Z,11Z,14Z,17Z)/18:2(9Z,12Z))', 'PE(…
820.511	256309	C45H76NO10P	[M-H]-	820.513	-2.68	['PS(17:0/22:6(4Z,7Z,10Z,13Z,16Z,19Z))', 'PS(17:2(9Z,12Z)/22:4(7Z,10Z,13Z,16Z))', 'PS(19:1(9Z)/20:5(5Z,8Z,11Z,14Z,17Z))', 'PS(20:5(5Z,8Z,11Z,14Z,17Z)/19:1(9Z))', 'PS(22:4(7Z,10Z,13Z,16Z)/17:2(9Z,12Z))', 'PS(22:6(4Z,7Z,10Z,13Z,16Z,19Z)/17:0)']
820.595	53381.4	0
820.611	24223.8	0
820.776	17153.5	0
821.514	128278	0
821.612	23569.6	C45H89N2O6P	[M+(37Cl)]-	821.612	0.17	['SM(d16:1/24:1)', 'SM(d18:1/22:1(13Z))', 'SM(d18:2/22:0)']
821.67	67200.2	0
821.78	7587.48	0
822.51	8581.64	0
822.528	284230	C43H74NO8P	[M+Hac-H]-	822.529	-1.08	['PC(13:0/22:6(4Z,7Z,10Z,13Z,16Z,19Z))', 'PC(15:1(9Z)/20:5(5Z,8Z,11Z,14Z,17Z))', 'PC(17:2(9Z,12Z)/18:4(6Z,9Z,12Z,15Z))', 'PC(18:4(6Z,9Z,12Z,15Z)/17:2(9Z,12Z))', 'PC(20:5(5Z,8Z,11Z,14Z,17Z)/15:1(9Z))', 'PC(22:6(4Z,7Z,10Z,13Z,16Z,19Z)/13:0)', 'PE(16:0/22:6(4Z,7Z,10Z,13Z,16Z,19Z))', 'PE(18:1(9Z)/20:5(5Z,8Z,11Z,14Z,17Z))', 'PE(18:2(9Z,12Z)/20:4(5Z,8Z,11Z,14Z))', 'PE(18:3(6Z,9Z,12Z)/20:3(8Z,11Z,14Z))'…
822.528	284230	C45H78NO10P	[M-H]-	822.529	-1.08	['PS(17:1(9Z)/22:4(7Z,10Z,13Z,16Z))', 'PS(19:0/20:5(5Z,8Z,11Z,14Z,17Z))', 'PS(19:1(9Z)/20:4(5Z,8Z,11Z,14Z))', 'PS(20:4(5Z,8Z,11Z,14Z)/19:1(9Z))', 'PS(20:5(5Z,8Z,11Z,14Z,17Z)/19:0)', 'PS(22:4(7Z,10Z,13Z,16Z)/17:1(9Z))']
822.673	36410.7	0
823.532	132481	C42H81O13P	[M-H]-	823.534	-2.97	['PI(12:0/21:0)', 'PI(13:0/20:0)', 'PI(14:0/19:0)', 'PI(15:0/18:0)', 'PI(16:0/17:0)', 'PI(17:0/16:0)', 'PI(18:0/15:0)', 'PI(19:0/14:0)', 'PI(20:0/13:0)', 'PI(21:0/12:0)']
823.688	9956.02	0
824.526	7783.45	C48H76NO8P	[M-H]-	824.524	2.61	['PC(18:4(6Z,9Z,12Z,15Z)/22:6(4Z,7Z,10Z,13Z,16Z,19Z))', 'PC(20:5(5Z,8Z,11Z,14Z,17Z)/20:5(5Z,8Z,11Z,14Z,17Z))', 'PC(22:6(4Z,7Z,10Z,13Z,16Z,19Z)/18:4(6Z,9Z,12Z,15Z))']
824.545	250805	C43H76NO8P	[M+Hac-H]-	824.545	-0.1	['PC(15:0/20:5(5Z,8Z,11Z,14Z,17Z))', 'PC(15:1(9Z)/20:4(5Z,8Z,11Z,14Z))', 'PC(17:1(9Z)/18:4(6Z,9Z,12Z,15Z))', 'PC(17:2(9Z,12Z)/18:3(6Z,9Z,12Z))', 'PC(17:2(9Z,12Z)/18:3(9Z,12Z,15Z))', 'PC(18:3(6Z,9Z,12Z)/17:2(9Z,12Z))', 'PC(18:3(9Z,12Z,15Z)/17:2(9Z,12Z))', 'PC(18:4(6Z,9Z,12Z,15Z)/17:1(9Z))', 'PC(20:4(5Z,8Z,11Z,14Z)/15:1(9Z))', 'PC(20:5(5Z,8Z,11Z,14Z,17Z)/15:0)', 'PE(16:1(9Z)/22:4(7Z,10Z,13Z,16Z))',…
824.545	250805	C45H80NO10P	[M-H]-	824.545	-0.1	['PS(17:0/22:4(7Z,10Z,13Z,16Z))', 'PS(17:2(9Z,12Z)/22:2(13Z,16Z))', 'PS(18:4(6Z,9Z,12Z,15Z)/21:0)', 'PS(19:0/20:4(5Z,8Z,11Z,14Z))', 'PS(19:1(9Z)/20:3(8Z,11Z,14Z))', 'PS(20:3(8Z,11Z,14Z)/19:1(9Z))', 'PS(20:4(5Z,8Z,11Z,14Z)/19:0)', 'PS(21:0/18:4(6Z,9Z,12Z,15Z))', 'PS(22:2(13Z,16Z)/17:2(9Z,12Z))', 'PS(22:4(7Z,10Z,13Z,16Z)/17:0)']
824.617	62088.2	C47H88NO8P	[M-H]-	824.617	-0.18	['PC(17:1(9Z)/22:2(13Z,16Z))', 'PC(17:2(9Z,12Z)/22:1(11Z))', 'PC(18:3(6Z,9Z,12Z)/21:0)', 'PC(18:3(9Z,12Z,15Z)/21:0)', 'PC(19:0/20:3(8Z,11Z,14Z))', 'PC(19:1(9Z)/20:2(11Z,14Z))', 'PC(20:2(11Z,14Z)/19:1(9Z))', 'PC(20:3(8Z,11Z,14Z)/19:0)', 'PC(21:0/18:3(6Z,9Z,12Z))', 'PC(21:0/18:3(9Z,12Z,15Z))', 'PC(22:1(11Z)/17:2(9Z,12Z))', 'PC(22:2(13Z,16Z)/17:1(9Z))', 'PE(20:1(11Z)/22:2(13Z,16Z))', 'PE(20:2(11Z,14…
825.456	13295.6	C43H71O13P	[M-H]-	825.456	0.19	['PI(12:0/22:6(4Z,7Z,10Z,13Z,16Z,19Z))', 'PI(14:1(9Z)/20:5(5Z,8Z,11Z,14Z,17Z))', 'PI(20:5(5Z,8Z,11Z,14Z,17Z)/14:1(9Z))', 'PI(22:6(4Z,7Z,10Z,13Z,16Z,19Z)/12:0)']
825.548	116415	0
825.621	28649.3	0
826.467	17229.3	C46H70NO10P	[M-H]-	826.466	0.62	['PS(18:4(6Z,9Z,12Z,15Z)/22:6(4Z,7Z,10Z,13Z,16Z,19Z))', 'PS(20:5(5Z,8Z,11Z,14Z,17Z)/20:5(5Z,8Z,11Z,14Z,17Z))', 'PS(22:6(4Z,7Z,10Z,13Z,16Z,19Z)/18:4(6Z,9Z,12Z,15Z))']
826.56	296906	C43H78NO8P	[M+Hac-H]-	826.56	0.01	['PC(13:0/22:4(7Z,10Z,13Z,16Z))', 'PC(15:0/20:4(5Z,8Z,11Z,14Z))', 'PC(15:1(9Z)/20:3(8Z,11Z,14Z))', 'PC(17:0/18:4(6Z,9Z,12Z,15Z))', 'PC(17:1(9Z)/18:3(6Z,9Z,12Z))', 'PC(17:1(9Z)/18:3(9Z,12Z,15Z))', 'PC(17:2(9Z,12Z)/18:2(9Z,12Z))', 'PC(18:2(9Z,12E)/17:2(9Z,11E))', 'PC(18:2(9Z,12Z)/17:2(9Z,12Z))', 'PC(18:3(6Z,9Z,12Z)/17:1(9Z))', 'PC(18:3(9Z,12Z,15Z)/17:1(9Z))', 'PC(18:4(6Z,9Z,12Z,15Z)/17:0)', 'PC(20:…
826.56	296906	C45H82NO10P	[M-H]-	826.56	0.01	['PS(17:1(9Z)/22:2(13Z,16Z))', 'PS(17:2(9Z,12Z)/22:1(11Z))', 'PS(18:3(6Z,9Z,12Z)/21:0)', 'PS(18:3(9Z,12Z,15Z)/21:0)', 'PS(19:0/20:3(8Z,11Z,14Z))', 'PS(19:1(9Z)/20:2(11Z,14Z))', 'PS(20:2(11Z,14Z)/19:1(9Z))', 'PS(20:3(8Z,11Z,14Z)/19:0)', 'PS(21:0/18:3(6Z,9Z,12Z))', 'PS(21:0/18:3(9Z,12Z,15Z))', 'PS(22:1(11Z)/17:2(9Z,12Z))', 'PS(22:2(13Z,16Z)/17:1(9Z))']
827.471	26787.7	C43H73O13P	[M-H]-	827.472	-0.41	['PI(14:0/20:5(5Z,8Z,11Z,14Z,17Z))', 'PI(14:1(9Z)/20:4(5Z,8Z,11Z,14Z))', 'PI(16:1(9Z)/18:4(6Z,9Z,12Z,15Z))', 'PI(18:4(6Z,9Z,12Z,15Z)/16:1(9Z))', 'PI(20:4(5Z,8Z,11Z,14Z)/14:1(9Z))', 'PI(20:5(5Z,8Z,11Z,14Z,17Z)/14:0)']
827.471	26787.7	C45H76O7P2	[M+(37Cl)]-	827.473	-2.19	['all-trans-Nonaprenyl diphosphate']
827.564	139595	0
828.577	224029	C43H80NO8P	[M+Hac-H]-	828.576	0.76	['PC(15:0/20:3(8Z,11Z,14Z))', 'PC(15:1(9Z)/20:2(11Z,14Z))', 'PC(17:0/18:3(6Z,9Z,12Z))', 'PC(17:0/18:3(9Z,12Z,15Z))', 'PC(17:1(9Z)/18:2(9Z,12Z))', 'PC(17:2(9Z,12Z)/18:1(9Z))', 'PC(18:1(9Z)/17:2(9Z,12Z))', 'PC(18:2(9Z,12Z)/17:1(9Z))', 'PC(18:3(6Z,9Z,12Z)/17:0)', 'PC(18:3(9Z,12Z,15Z)/17:0)', 'PC(20:2(11Z,14Z)/15:1(9Z))', 'PC(20:3(8Z,11Z,14Z)/15:0)', 'PE(16:1(9Z)/22:2(13Z,16Z))', 'PE(18:0/20:3(8Z,11Z…
828.577	224029	C45H84NO10P	[M-H]-	828.576	0.76	['PS(17:0/22:2(13Z,16Z))', 'PS(17:1(9Z)/22:1(11Z))', 'PS(17:2(9Z,12Z)/22:0)', 'PS(18:2(9Z,12Z)/21:0)', 'PS(19:0/20:2(11Z,14Z))', 'PS(19:1(9Z)/20:1(11Z))', 'PS(20:1(11Z)/19:1(9Z))', 'PS(20:2(11Z,14Z)/19:0)', 'PS(21:0/18:2(9Z,12Z))', 'PS(22:0/17:2(9Z,12Z))', 'PS(22:1(11Z)/17:1(9Z))', 'PS(22:2(13Z,16Z)/17:0)']
829.487	178618	C41H78O12S	[M+Cl]-	829.491	-3.98	['SQDG(16:0/16:0)']
829.487	178618	C43H75O13P	[M-H]-	829.487	0.29	['PI(12:0/22:4(7Z,10Z,13Z,16Z))', 'PI(14:0/20:4(5Z,8Z,11Z,14Z))', 'PI(14:1(9Z)/20:3(8Z,11Z,14Z))', 'PI(16:0/18:4(6Z,9Z,12Z,15Z))', 'PI(16:1(9Z)/18:3(6Z,9Z,12Z))', 'PI(16:1(9Z)/18:3(9Z,12Z,15Z))', 'PI(17:2(9Z,12Z)/17:2(9Z,12Z))', 'PI(18:3(6Z,9Z,12Z)/16:1(9Z))', 'PI(18:3(9Z,12Z,15Z)/16:1(9Z))', 'PI(18:4(6Z,9Z,12Z,15Z)/16:0)', 'PI(20:3(8Z,11Z,14Z)/14:1(9Z))', 'PI(20:4(5Z,8Z,11Z,14Z)/14:0)', 'PI(22:4…
829.564	6250.61	0
829.58	105684	0
829.644	17076.6	C44H87N2O6P	[M+Hac-H]-	829.644	-0.36	['SM(d18:2/21:0)']
830.575	3645.29	0
830.593	91094.2	C43H82NO8P	[M+Hac-H]-	830.592	1.16	['PC(13:0/22:2(13Z,16Z))', 'PC(15:0/20:2(11Z,14Z))', 'PC(15:1(9Z)/20:1(11Z))', 'PC(16:1(9Z)/19:1(9Z))', 'PC(17:0/18:2(9Z,12Z))', 'PC(17:1(9Z)/18:1(9Z))', 'PC(17:2(9Z,12Z)/18:0)', 'PC(18:0/17:2(9Z,12Z))', 'PC(18:1(9Z)/17:1(9Z))', 'PC(18:2(9Z,12Z)/17:0)', 'PC(19:1(9Z)/16:1(9Z))', 'PC(20:1(11Z)/15:1(9Z))', 'PC(20:2(11Z,14Z)/15:0)', 'PC(22:2(13Z,16Z)/13:0)', 'PE(16:0/22:2(13Z,16Z))', 'PE(16:1(9Z)/22:…
830.593	91094.2	C45H86NO10P	[M-H]-	830.592	1.16	['PS(17:0/22:1(11Z))', 'PS(17:1(9Z)/22:0)', 'PS(18:1(9Z)/21:0)', 'PS(19:0/20:1(11Z))', 'PS(19:1(9Z)/20:0)', 'PS(20:0/19:1(9Z))', 'PS(20:1(11Z)/19:0)', 'PS(21:0/18:1(9Z))', 'PS(22:0/17:1(9Z))', 'PS(22:1(11Z)/17:0)']
830.647	4828.19	0
831.596	47996.8	0
831.66	32208.3	C44H89N2O6P	[M+Hac-H]-	831.66	-0.04	['SM(d16:1/23:0)', 'SM(d17:1/22:0)', 'SM(d18:1/21:0)', 'SM(d19:1/20:0)', 'SM(d20:1/19:0)']
832.571	15005.9	C42H80NO9P	[M+Hac-H]-	832.571	0.2	['PS(O-16:0/20:2(11Z,14Z))', 'PS(O-18:0/18:2(9Z,12Z))', 'PS(P-16:0/20:1(11Z))', 'PS(P-18:0/18:1(9Z))', 'PS(P-20:0/16:1(9Z))']
832.609	35970.3	C43H84NO8P	[M+Hac-H]-	832.607	1.96	['PC(13:0/22:1(11Z))', 'PC(14:1(9Z)/21:0)', 'PC(15:0/20:1(11Z))', 'PC(15:1(9Z)/20:0)', 'PC(16:0/19:1(9Z))', 'PC(16:1(9Z)/19:0)', 'PC(17:0/18:1(9Z))', 'PC(17:1(9Z)/18:0)', 'PC(18:0/17:1(9Z))', 'PC(18:1(9Z)/17:0)', 'PC(19:0/16:1(9Z))', 'PC(19:1(9Z)/16:0)', 'PC(20:0/15:1(9Z))', 'PC(20:1(11Z)/15:0)', 'PC(21:0/14:1(9Z))', 'PC(22:1(11Z)/13:0)', 'PE(16:0/22:1(11Z))', 'PE(16:0/22:1(13Z))', 'PE(16:1(9Z)/2…
832.609	35970.3	C45H88NO10P	[M-H]-	832.607	1.96	['PS(17:0/22:0)', 'PS(18:0/21:0)', 'PS(19:0/20:0)', 'PS(20:0/19:0)', 'PS(21:0/18:0)', 'PS(22:0/17:0)']
832.644	21501.4	C44H88NO7P	[M+Hac-H]-	832.644	0.1	['PC(O-16:0/20:1(11Z))', 'PC(O-16:0/20:1(9Z))', 'PC(O-18:0/18:1(9Z))', 'PC(O-20:0/16:1(9Z))', 'PC(P-16:0/20:0)', 'PC(P-18:0/18:0)', 'PC(P-20:0/16:0)', 'PE(O-20:0/19:1(9Z))', 'PE(P-18:0/21:0)', 'PE(P-20:0/19:0)']
832.644	21501.4	C46H92NO9P	[M-H]-	832.644	0.1	['PS(O-18:0/22:0)', 'PS(O-20:0/20:0)']
832.644	21501.4	C47H91NO8	[M+Cl]-	832.644	-0.11	['GalCer(d18:1/23:0)', 'GlcCer(d18:1/23:0)']
832.663	17105.7	0
833.503	26279.4	0
833.612	20292	0
834.504	4036.68	C43H78NO10P	[M+Cl]-	834.506	-2.07	['PS(15:1(9Z)/22:2(13Z,16Z))', 'PS(17:0/20:3(8Z,11Z,14Z))', 'PS(17:1(9Z)/20:2(11Z,14Z))', 'PS(17:2(9Z,12Z)/20:1(11Z))', 'PS(18:2(9Z,12Z)/19:1(9Z))', 'PS(18:3(6Z,9Z,12Z)/19:0)', 'PS(18:3(9Z,12Z,15Z)/19:0)', 'PS(19:0/18:3(6Z,9Z,12Z))', 'PS(19:0/18:3(9Z,12Z,15Z))', 'PS(19:1(9Z)/18:2(9Z,12Z))', 'PS(20:1(11Z)/17:2(9Z,12Z))', 'PS(20:2(11Z,14Z)/17:1(9Z))', 'PS(20:3(8Z,11Z,14Z)/17:0)', 'PS(22:2(13Z,16Z)/…
834.564	11015.2	C45H78NO7P	[M+Hac-H]-	834.565	-1.48	['PE(P-18:0/22:6(4Z,7Z,10Z,13Z,16Z,19Z))']
835.536	53294.4	C43H81O13P	[M-H]-	835.534	2.33	['PI(12:0/22:1(11Z))', 'PI(14:0/20:1(11Z))', 'PI(14:1(9Z)/20:0)', 'PI(15:0/19:1(9Z))', 'PI(15:1(9Z)/19:0)', 'PI(16:0/18:1(9Z))', 'PI(16:1(9Z)/18:0)', 'PI(17:0/17:1(9Z))', 'PI(17:1(9Z)/17:0)', 'PI(18:0/16:1(9Z))', 'PI(18:1(9Z)/16:0)', 'PI(19:0/15:1(9Z))', 'PI(19:1(9Z)/15:0)', 'PI(20:0/14:1(9Z))', 'PI(20:1(11Z)/14:0)', 'PI(22:1(11Z)/12:0)']
835.649	32768.2	C46H93N2O6P	[M+Cl]-	835.647	3.02	['SM(d16:1/25:0)', 'SM(d17:1/24:0)', 'SM(d18:1/23:0)']
836.516	8543.43	0
836.525	15875.8	0
836.544	971293	C44H76NO8P	[M+Hac-H]-	836.545	-0.54	['PC(14:0/22:6(4Z,7Z,10Z,13Z,16Z,19Z))', 'PC(16:1(9Z)/20:5(5Z,8Z,11Z,14Z,17Z))', 'PC(18:2(9Z,12Z)/18:4(6Z,9Z,12Z,15Z))', 'PC(18:3(6Z,9Z,12Z)/18:3(6Z,9Z,12Z))', 'PC(18:3(6Z,9Z,12Z)/18:3(9Z,12Z,15Z))', 'PC(18:3(9E,11E,13E)/18:3(9E,11E,13E))', 'PC(18:3(9Z,11E,13E)/18:3(9Z,11E,13E))', 'PC(18:3(9Z,12Z,15Z)/18:3(6Z,9Z,12Z))', 'PC(18:3(9Z,12Z,15Z)/18:3(9Z,12Z,15Z))', 'PC(18:4(6Z,9Z,12Z,15Z)/18:2(9Z,12Z)…
836.544	971293	C46H80NO10P	[M-H]-	836.545	-0.54	['PS(18:1(9Z)/22:4(7Z,10Z,13Z,16Z))', 'PS(18:3(6Z,9Z,12Z)/22:2(13Z,16Z))', 'PS(18:3(9Z,12Z,15Z)/22:2(13Z,16Z))', 'PS(18:4(6Z,9Z,12Z,15Z)/22:1(11Z))', 'PS(20:0/20:5(5Z,8Z,11Z,14Z,17Z))', 'PS(20:1(11Z)/20:4(5Z,8Z,11Z,14Z))', 'PS(20:2(11Z,14Z)/20:3(8Z,11Z,14Z))', 'PS(20:3(8Z,11Z,14Z)/20:2(11Z,14Z))', 'PS(20:4(5Z,8Z,11Z,14Z)/20:1(11Z))', 'PS(20:5(5Z,8Z,11Z,14Z,17Z)/20:0)', 'PS(22:1(11Z)/18:4(6Z,9Z,12…
836.574	5912.56	C45H86NO8P	[M+(37Cl)]-	836.576	-1.56	['PC(15:0/22:2(13Z,16Z))', 'PC(15:1(9Z)/22:1(11Z))', 'PC(17:0/20:2(11Z,14Z))', 'PC(17:1(9Z)/20:1(11Z))', 'PC(17:2(9Z,12Z)/20:0)', 'PC(18:1(9Z)/19:1(9Z))', 'PC(18:2(9Z,12Z)/19:0)', 'PC(19:0/18:2(9Z,12Z))', 'PC(19:1(9Z)/18:1(9Z))', 'PC(20:0/17:2(9Z,12Z))', 'PC(20:1(11Z)/17:1(9Z))', 'PC(20:2(11Z,14Z)/17:0)', 'PC(22:1(11Z)/15:1(9Z))', 'PC(22:2(13Z,16Z)/15:0)', 'PE(18:0/22:2(13Z,16Z))', 'PE(18:1(9Z)/2…
836.574	5912.56	C48H84NO6P	[M+Cl]-	836.573	1.46	['NA']
836.652	20059.1	0
837.548	484517	C43H83O13P	[M-H]-	837.55	-2.07	['PI(12:0/22:0)', 'PI(13:0/21:0)', 'PI(14:0/20:0)', 'PI(15:0/19:0)', 'PI(16:0/18:0)', 'PI(17:0/17:0)', 'PI(18:0/16:0)', 'PI(19:0/15:0)', 'PI(20:0/14:0)', 'PI(21:0/13:0)', 'PI(22:0/12:0)']
837.569	4222.48	0
837.665	93985.6	0
838.533	14914.1	C40H77NO11S	[M+Hac-H]-	838.536	-3.67	['C16 Sulfatide']
838.541	32304.6	C49H78NO8P	[M-H]-	838.539	1.96	['PE(22:4(7Z,10Z,13Z,16Z)/22:6(4Z,7Z,10Z,13Z,16Z,19Z))', 'PE(22:6(4Z,7Z,10Z,13Z,16Z,19Z)/22:4(7Z,10Z,13Z,16Z))']
838.56	1.20072e+06	C44H78NO8P	[M+Hac-H]-	838.56	-0.3	['PC(14:1(9Z)/22:4(7Z,10Z,13Z,16Z))', 'PC(16:0/20:5(5Z,8Z,11Z,14Z,17Z))', 'PC(16:1(7Z)/20:4(5Z,8Z,11Z,14Z))', 'PC(16:1(9Z)/20:4(5Z,8Z,11Z,14Z))', 'PC(18:1(9Z)/18:4(6Z,9Z,12Z,15Z))', 'PC(18:2(9Z,12Z)/18:3(6Z,9Z,12Z))', 'PC(18:2(9Z,12Z)/18:3(9Z,12Z,15Z))', 'PC(18:3(6Z,9Z,12Z)/18:2(9Z,12Z))', 'PC(18:3(9Z,12Z,15Z)/18:2(9Z,12Z))', 'PC(18:4(6Z,9Z,12Z,15Z)/18:1(9Z))', 'PC(20:4(5Z,8Z,11Z,14Z)/16:1(9Z))',…
838.56	1.20072e+06	C46H82NO10P	[M-H]-	838.56	-0.3	['PS(18:0/22:4(7Z,10Z,13Z,16Z))', 'PS(18:2(9Z,12Z)/22:2(13Z,16Z))', 'PS(18:3(6Z,9Z,12Z)/22:1(11Z))', 'PS(18:3(9Z,12Z,15Z)/22:1(11Z))', 'PS(18:4(6Z,9Z,12Z,15Z)/22:0)', 'PS(20:0/20:4(5Z,8Z,11Z,14Z))', 'PS(20:1(11Z)/20:3(8Z,11Z,14Z))', 'PS(20:2(11Z,14Z)/20:2(11Z,14Z))', 'PS(20:3(8Z,11Z,14Z)/20:1(11Z))', 'PS(20:4(5Z,8Z,11Z,14Z)/20:0)', 'PS(22:0/18:4(6Z,9Z,12Z,15Z))', 'PS(22:1(11Z)/18:3(6Z,9Z,12Z))', …
838.668	54018	0
839.536	5940.61	C44H83O10P	[M+(37Cl)]-	839.539	-3.83	['PG(16:0/22:2(13Z,16Z))', 'PG(16:1(9Z)/22:1(11Z))', 'PG(17:2(9Z,12Z)/21:0)', 'PG(18:0/20:2(11Z,14Z))', 'PG(18:1(9Z)/20:1(11Z))', 'PG(18:2(9Z,12Z)/20:0)', 'PG(19:1(9Z)/19:1(9Z))', 'PG(20:0/18:2(9Z,12Z))', 'PG(20:1(11Z)/18:1(9Z))', 'PG(20:2(11Z,14Z)/18:0)', 'PG(21:0/17:2(9Z,12Z))', 'PG(22:1(11Z)/16:1(9Z))', 'PG(22:2(13Z,16Z)/16:0)']
839.536	5940.61	C47H81O8P	[M+Cl]-	839.536	-0.82	['PA(22:0/22:6(4Z,7Z,10Z,13Z,16Z,19Z))', 'PA(22:2(13Z,16Z)/22:4(7Z,10Z,13Z,16Z))', 'PA(22:4(7Z,10Z,13Z,16Z)/22:2(13Z,16Z))', 'PA(22:6(4Z,7Z,10Z,13Z,16Z,19Z)/22:0)']
841.523	5335.29	C43H75O10P	[M+Hac-H]-	841.524	-0.77	['PG(15:1(9Z)/22:4(7Z,10Z,13Z,16Z))', 'PG(17:0/20:5(5Z,8Z,11Z,14Z,17Z))', 'PG(17:1(9Z)/20:4(5Z,8Z,11Z,14Z))', 'PG(17:2(9Z,12Z)/20:3(8Z,11Z,14Z))', 'PG(18:4(6Z,9Z,12Z,15Z)/19:1(9Z))', 'PG(19:1(9Z)/18:4(6Z,9Z,12Z,15Z))', 'PG(20:3(8Z,11Z,14Z)/17:2(9Z,12Z))', 'PG(20:4(5Z,8Z,11Z,14Z)/17:1(9Z))', 'PG(20:5(5Z,8Z,11Z,14Z,17Z)/17:0)', 'PG(22:4(7Z,10Z,13Z,16Z)/15:1(9Z))']
839.563	611356	0
839.628	14260.8	0
839.683	13974.9	0
840.575	1.32232e+06	C44H80NO8P	[M+Hac-H]-	840.576	-0.75	['PC(14:0/22:4(7Z,10Z,13Z,16Z))', 'PC(16:0/20:4(5E,8E,11E,14E))', 'PC(16:0/20:4(5Z,8Z,11Z,14Z))', 'PC(16:1(9Z)/20:3(8Z,11Z,14Z))', 'PC(18:0/18:4(6Z,9Z,12Z,15Z))', 'PC(18:0/18:4(9E,11E,13E,15E))', 'PC(18:1(9Z)/18:3(6Z,9Z,12Z))', 'PC(18:1(9Z)/18:3(9Z,12Z,15Z))', 'PC(18:2(2E,4E)/18:2(2E,4E))', 'PC(18:2(2Z,4Z)/18:2(2Z,4Z))', 'PC(18:2(6Z,9Z)/18:2(6Z,9Z))', 'PC(18:2(9Z,11Z)/18:2(9Z,11Z))', 'PC(18:2(9Z,…
840.575	1.32232e+06	C46H84NO10P	[M-H]-	840.576	-0.75	['PS(18:1(9Z)/22:2(13Z,16Z))', 'PS(18:2(9Z,12Z)/22:1(11Z))', 'PS(18:3(6Z,9Z,12Z)/22:0)', 'PS(18:3(9Z,12Z,15Z)/22:0)', 'PS(20:0/20:3(8Z,11Z,14Z))', 'PS(20:1(11Z)/20:2(11Z,14Z))', 'PS(20:2(11Z,14Z)/20:1(11Z))', 'PS(20:3(8Z,11Z,14Z)/20:0)', 'PS(22:0/18:3(6Z,9Z,12Z))', 'PS(22:0/18:3(9Z,12Z,15Z))', 'PS(22:1(11Z)/18:2(9Z,12Z))', 'PS(22:2(13Z,16Z)/18:1(9Z))']
840.595	11955.7	0
840.605	5782.81	C45H90NO8P	[M+(37Cl)]-	840.607	-2.16	['PC(15:0/22:0)', 'PC(16:0/21:0)', 'PC(17:0/20:0)', 'PC(18:0/19:0)', 'PC(19:0/18:0)', 'PC(20:0/17:0)', 'PC(21:0/16:0)', 'PC(22:0/15:0)', 'PE(18:0/22:0)', 'PE(19:0/21:0)', 'PE(20:0/20:0)', 'PE(21:0/19:0)', 'PE(22:0/18:0)']
840.605	5782.81	C48H88NO6P	[M+Cl]-	840.604	0.85	['NA']
840.63	5030.17	0
840.684	11542.4	0
845.592	3666.39	C44H83O9P	[M+Hac-H]-	845.591	1	['PG(O-18:0/20:3(8Z,11Z,14Z))', 'PG(O-20:0/18:3(6Z,9Z,12Z))', 'PG(O-20:0/18:3(9Z,12Z,15Z))', 'PG(P-16:0/22:2(13Z,16Z))', 'PG(P-18:0/20:2(11Z,14Z))', 'PG(P-20:0/18:2(9Z,12Z))']
841.523	5335.29	C45H79O12P	[M-H]-	841.524	-0.77	['PI(O-16:0/20:5(5Z,8Z,11Z,14Z,17Z))', 'PI(P-16:0/20:4(5Z,8Z,11Z,14Z))', 'PI(P-18:0/18:4(6Z,9Z,12Z,15Z))']
841.538	5092.03	0
841.579	673593	0
841.599	7527.34	C45H83O8P	[M+Hac-H]-	841.596	2.78	['PA(20:1(11Z)/22:2(13Z,16Z))', 'PA(20:2(11Z,14Z)/22:1(11Z))', 'PA(20:3(8Z,11Z,14Z)/22:0)', 'PA(22:0/20:3(8Z,11Z,14Z))', 'PA(22:1(11Z)/20:2(11Z,14Z))', 'PA(22:2(13Z,16Z)/20:1(11Z))']
841.599	7527.34	C47H87O10P	[M-H]-	841.596	2.78	['PG(19:1(9Z)/22:2(13Z,16Z))', 'PG(20:3(8Z,11Z,14Z)/21:0)', 'PG(21:0/20:3(8Z,11Z,14Z))', 'PG(22:2(13Z,16Z)/19:1(9Z))']
842.497	11179.8	C45H70NO8P	[M+Hac-H]-	842.498	-1.05	['PE(18:4(6Z,9Z,12Z,15Z)/22:6(4Z,7Z,10Z,13Z,16Z,19Z))', 'PE(20:5(5Z,8Z,11Z,14Z,17Z)/20:5(5Z,8Z,11Z,14Z,17Z))', 'PE(22:6(4Z,7Z,10Z,13Z,16Z,19Z)/18:4(6Z,9Z,12Z,15Z))']
842.563	16264.6	C47H84NO7P	[M+(37Cl)]-	842.565	-2.59	['PE(O-20:0/22:6(4Z,7Z,10Z,13Z,16Z,19Z))']
842.592	779450	C44H82NO8P	[M+Hac-H]-	842.592	0.36	['PC(14:1(9Z)/22:2(13Z,16Z))', 'PC(16:0/20:3(5Z,8Z,11Z))', 'PC(16:0/20:3(8E,11E,14E))', 'PC(16:0/20:3(8Z,11Z,14Z))', 'PC(16:1(9Z)/20:2(11Z,14Z))', 'PC(17:2(9Z,12Z)/19:1(9Z))', 'PC(18:0/18:3(6Z,9Z,12Z))', 'PC(18:0/18:3(9Z,12Z,15Z))', 'PC(18:1(9Z)/18:2(6Z,9Z))', 'PC(18:1(9Z)/18:2(9Z,12Z))', 'PC(18:2(9Z,12Z)/18:1(9Z))', 'PC(18:3(6Z,9Z,12Z)/18:0)', 'PC(18:3(9Z,12Z,15Z)/18:0)', 'PC(19:1(9Z)/17:2(9Z,12…
842.592	779450	C46H86NO10P	[M-H]-	842.592	0.36	['PS(18:0/22:2(13Z,16Z))', 'PS(18:1(9Z)/22:1(11Z))', 'PS(18:2(9Z,12Z)/22:0)', 'PS(20:0/20:2(11Z,14Z))', 'PS(20:1(11Z)/20:1(11Z))', 'PS(20:2(11Z,14Z)/20:0)', 'PS(22:0/18:2(9Z,12Z))', 'PS(22:1(11Z)/18:1(9Z))', 'PS(22:2(13Z,16Z)/18:0)']
842.7	11679.9	C49H98NO7P	[M-H]-	842.701	-1.45	['PC(P-20:0/21:0)']
843.502	23319.4	C44H77O13P	[M-H]-	843.503	-0.61	['PI(13:0/22:4(7Z,10Z,13Z,16Z))', 'PI(15:0/20:4(5Z,8Z,11Z,14Z))', 'PI(15:1(9Z)/20:3(8Z,11Z,14Z))', 'PI(17:0/18:4(6Z,9Z,12Z,15Z))', 'PI(17:1(9Z)/18:3(6Z,9Z,12Z))', 'PI(17:1(9Z)/18:3(9Z,12Z,15Z))', 'PI(17:2(9Z,12Z)/18:2(9Z,12Z))', 'PI(18:2(9Z,12Z)/17:2(9Z,12Z))', 'PI(18:3(6Z,9Z,12Z)/17:1(9Z))', 'PI(18:3(9Z,12Z,15Z)/17:1(9Z))', 'PI(18:4(6Z,9Z,12Z,15Z)/17:0)', 'PI(20:3(8Z,11Z,14Z)/15:1(9Z))', 'PI(20:…
843.595	398698	0
843.659	63553.8	C45H89N2O6P	[M+Hac-H]-	843.66	-0.28	['SM(d16:1/24:1)', 'SM(d18:1/22:1(13Z))', 'SM(d18:2/22:0)']
844.511	37608.5	C45H72NO8P	[M+Hac-H]-	844.513	-2.9	['PE(18:3(6Z,9Z,12Z)/22:6(4Z,7Z,10Z,13Z,16Z,19Z))', 'PE(18:3(9Z,12Z,15Z)/22:6(4Z,7Z,10Z,13Z,16Z,19Z))', 'PE(20:4(5Z,8Z,11Z,14Z)/20:5(5Z,8Z,11Z,14Z,17Z))', 'PE(20:5(5Z,8Z,11Z,14Z,17Z)/20:4(5Z,8Z,11Z,14Z))', 'PE(22:6(4Z,7Z,10Z,13Z,16Z,19Z)/18:3(6Z,9Z,12Z))', 'PE(22:6(4Z,7Z,10Z,13Z,16Z,19Z)/18:3(9Z,12Z,15Z))']
844.511	37608.5	C45H78NO9P	[M+(37Cl)]-	844.508	3.65	['PE(18:0/22:6(4Z,7Z,10Z,12E,16Z,19Z)(14OH))']
844.591	22986	0
844.609	229786	C44H84NO8P	[M+Hac-H]-	844.607	1.43	['PC(14:0/22:2(13Z,16Z))', 'PC(14:1(9Z)/22:1(11Z))', 'PC(16:0/20:2(11Z,14Z))', 'PC(16:1(9Z)/20:1(11Z))', 'PC(17:1(9Z)/19:1(9Z))', 'PC(17:2(9Z,12Z)/19:0)', 'PC(18:0/18:2(10Z,12Z))', 'PC(18:0/18:2(2E,4E))', 'PC(18:0/18:2(6Z,9Z))', 'PC(18:0/18:2(9Z,12Z))', 'PC(18:1(10Z)/18:1(10Z))', 'PC(18:1(11E)/18:1(11E))', 'PC(18:1(11Z)/18:1(11Z))', 'PC(18:1(12Z)/18:1(12Z))', 'PC(18:1(13Z)/18:1(13Z))', 'PC(18:1(1…
844.609	229786	C46H88NO10P	[M-H]-	844.607	1.43	['PS(18:0/22:1(11Z))', 'PS(18:1(9Z)/22:0)', 'PS(19:1(9Z)/21:0)', 'PS(20:0/20:1(11Z))', 'PS(20:1(11Z)/20:0)', 'PS(21:0/19:1(9Z))', 'PS(22:0/18:1(9Z))', 'PS(22:1(11Z)/18:0)']
844.663	32074.4	0
845.579	5076.56	0
791.619	14137.5	C44H89O9P	[M-H]-	791.617	1.73	['PG(O-16:0/22:0)', 'PG(O-18:0/20:0)', 'PG(O-20:0/18:0)']
845.611	136011	0
845.676	85015.4	C45H91N2O6P	[M+Hac-H]-	845.675	0.21	['SM(d16:1/24:0)', 'SM(d18:1/22:0)']
846.527	28566.3	C45H74NO8P	[M+Hac-H]-	846.529	-2.28	['PE(18:2(9Z,12Z)/22:6(4Z,7Z,10Z,13Z,16Z,19Z))', 'PE(18:4(6Z,9Z,12Z,15Z)/22:4(7Z,10Z,13Z,16Z))', 'PE(20:3(8Z,11Z,14Z)/20:5(5Z,8Z,11Z,14Z,17Z))', 'PE(20:4(5Z,8Z,11Z,14Z)/20:4(5Z,8Z,11Z,14Z))', 'PE(20:5(5Z,8Z,11Z,14Z,17Z)/20:3(8Z,11Z,14Z))', 'PE(22:4(7Z,10Z,13Z,16Z)/18:4(6Z,9Z,12Z,15Z))', 'PE(22:6(4Z,7Z,10Z,13Z,16Z,19Z)/18:2(9Z,12Z))']
846.527	28566.3	C47H78NO10P	[M-H]-	846.529	-2.28	['PS(19:1(9Z)/22:6(4Z,7Z,10Z,13Z,16Z,19Z))', 'PS(22:6(4Z,7Z,10Z,13Z,16Z,19Z)/19:1(9Z))']
846.626	41473.1	C44H86NO8P	[M+Hac-H]-	846.623	3.01	['PC(14:0/22:1(11Z))', 'PC(14:1(9Z)/22:0)', 'PC(15:1(9Z)/21:0)', 'PC(16:0/20:1(11Z))', 'PC(16:1(9Z)/20:0)', 'PC(17:0/19:1(9Z))', 'PC(17:1(9Z)/19:0)', 'PC(18:0/18:1(11Z))', 'PC(18:0/18:1(12Z))', 'PC(18:0/18:1(13Z))', 'PC(18:0/18:1(16Z))', 'PC(18:0/18:1(6Z))', 'PC(18:0/18:1(7Z))', 'PC(18:0/18:1(9E))', 'PC(18:0/18:1(9Z))', 'PC(18:1(11Z)/18:0)', 'PC(18:1(9Z)/18:0)', 'PC(19:0/17:1(9Z))', 'PC(19:1(9Z)/…
846.626	41473.1	C46H90NO10P	[M-H]-	846.623	3.01	['PS(18:0/22:0)', 'PS(19:0/21:0)', 'PS(20:0/20:0)', 'PS(21:0/19:0)', 'PS(22:0/18:0)']
846.679	44670.3	0
847.534	23733.9	C44H81O13P	[M-H]-	847.534	-0.29	['PI(13:0/22:2(13Z,16Z))', 'PI(15:0/20:2(11Z,14Z))', 'PI(15:1(9Z)/20:1(11Z))', 'PI(16:1(9Z)/19:1(9Z))', 'PI(17:0/18:2(9Z,12Z))', 'PI(17:1(9Z)/18:1(9Z))', 'PI(17:2(9Z,12Z)/18:0)', 'PI(18:0/17:2(9Z,12Z))', 'PI(18:1(9Z)/17:1(9Z))', 'PI(18:2(9Z,12Z)/17:0)', 'PI(19:1(9Z)/16:1(9Z))', 'PI(20:1(11Z)/15:1(9Z))', 'PI(20:2(11Z,14Z)/15:0)', 'PI(22:2(13Z,16Z)/13:0)']
847.627	28629.6	C47H91N2O6P	[M+(37Cl)]-	847.628	-0.53	['SM(d18:2/24:1)']
848.688	8709.97	0
849.702	10917.8	0
850.56	44927	C45H78NO8P	[M+Hac-H]-	850.56	-0.76	['PC(15:0/22:6(4Z,7Z,10Z,13Z,16Z,19Z))', 'PC(17:1(9Z)/20:5(5Z,8Z,11Z,14Z,17Z))', 'PC(17:2(9Z,12Z)/20:4(5Z,8Z,11Z,14Z))', 'PC(20:4(5Z,8Z,11Z,14Z)/17:2(9Z,12Z))', 'PC(20:5(5Z,8Z,11Z,14Z,17Z)/17:1(9Z))', 'PC(22:6(4Z,7Z,10Z,13Z,16Z,19Z)/15:0)', 'PE(18:0/22:6(4Z,7Z,10Z,13Z,16Z,19Z))', 'PE(18:2(9Z,12Z)/22:4(7Z,10Z,13Z,16Z))', 'PE(18:4(6Z,9Z,12Z,15Z)/22:2(13Z,16Z))', 'PE(20:1(11Z)/20:5(5Z,8Z,11Z,14Z,17Z…
850.56	44927	C47H82NO10P	[M-H]-	850.56	-0.76	['PS(19:1(9Z)/22:4(7Z,10Z,13Z,16Z))', 'PS(20:5(5Z,8Z,11Z,14Z,17Z)/21:0)', 'PS(21:0/20:5(5Z,8Z,11Z,14Z,17Z))', 'PS(22:4(7Z,10Z,13Z,16Z)/19:1(9Z))']
850.705	6269.68	0
851.564	25111.3	C44H85O13P	[M-H]-	851.566	-2.22	['PI(13:0/22:0)', 'PI(14:0/21:0)', 'PI(15:0/20:0)', 'PI(16:0/19:0)', 'PI(17:0/18:0)', 'PI(18:0/17:0)', 'PI(19:0/16:0)', 'PI(20:0/15:0)', 'PI(21:0/14:0)', 'PI(22:0/13:0)']
852.54	12928.4	C44H76NO9P	[M+Hac-H]-	852.54	0.65	['PS(O-16:0/22:6(4Z,7Z,10Z,13Z,16Z,19Z))', 'PS(P-18:0/20:5(5Z,8Z,11Z,14Z,17Z))']
852.577	28027.6	C45H80NO8P	[M+Hac-H]-	852.576	0.7	['PC(15:1(9Z)/22:4(7Z,10Z,13Z,16Z))', 'PC(17:0/20:5(5Z,8Z,11Z,14Z,17Z))', 'PC(17:1(9Z)/20:4(5Z,8Z,11Z,14Z))', 'PC(17:2(9Z,12Z)/20:3(8Z,11Z,14Z))', 'PC(18:4(6Z,9Z,12Z,15Z)/19:1(9Z))', 'PC(19:1(9Z)/18:4(6Z,9Z,12Z,15Z))', 'PC(20:3(8Z,11Z,14Z)/17:2(9Z,12Z))', 'PC(20:4(5Z,8Z,11Z,14Z)/17:1(9Z))', 'PC(20:5(5Z,8Z,11Z,14Z,17Z)/17:0)', 'PC(22:4(7Z,10Z,13Z,16Z)/15:1(9Z))', 'PE(18:1(9Z)/22:4(7Z,10Z,13Z,16Z))…
852.577	28027.6	C47H84NO10P	[M-H]-	852.576	0.7	['PS(19:0/22:4(7Z,10Z,13Z,16Z))', 'PS(20:4(5Z,8Z,11Z,14Z)/21:0)', 'PS(21:0/20:4(5Z,8Z,11Z,14Z))', 'PS(22:4(7Z,10Z,13Z,16Z)/19:0)']
853.487	177292	C45H75O13P	[M-H]-	853.487	-0.02	['PI(14:0/22:6(4Z,7Z,10Z,13Z,16Z,19Z))', 'PI(16:1(9Z)/20:5(5Z,8Z,11Z,14Z,17Z))', 'PI(18:2(9Z,12Z)/18:4(6Z,9Z,12Z,15Z))', 'PI(18:3(6Z,9Z,12Z)/18:3(6Z,9Z,12Z))', 'PI(18:3(6Z,9Z,12Z)/18:3(9Z,12Z,15Z))', 'PI(18:3(9Z,12Z,15Z)/18:3(6Z,9Z,12Z))', 'PI(18:3(9Z,12Z,15Z)/18:3(9Z,12Z,15Z))', 'PI(18:4(6Z,9Z,12Z,15Z)/18:2(9Z,12Z))', 'PI(20:5(5Z,8Z,11Z,14Z,17Z)/16:1(9Z))', 'PI(22:6(4Z,7Z,10Z,13Z,16Z,19Z)/14:0)']
853.58	11825.8	0
854.49	85697.4	0
854.556	9186.05	C44H78NO9P	[M+Hac-H]-	854.555	0.85	['PS(O-18:0/20:5(5Z,8Z,11Z,14Z,17Z))', 'PS(P-16:0/22:4(7Z,10Z,13Z,16Z))', 'PS(P-18:0/20:4(5Z,8Z,11Z,14Z))', 'PS(P-20:0/18:4(6Z,9Z,12Z,15Z))']
854.592	15270.1	C45H82NO8P	[M+Hac-H]-	854.592	0.54	['PC(15:0/22:4(7Z,10Z,13Z,16Z))', 'PC(17:0/20:4(5Z,8Z,11Z,14Z))', 'PC(17:1(9Z)/20:3(8Z,11Z,14Z))', 'PC(17:2(9Z,12Z)/20:2(11Z,14Z))', 'PC(18:3(6Z,9Z,12Z)/19:1(9Z))', 'PC(18:3(9Z,12Z,15Z)/19:1(9Z))', 'PC(18:4(6Z,9Z,12Z,15Z)/19:0)', 'PC(19:0/18:4(6Z,9Z,12Z,15Z))', 'PC(19:1(9Z)/18:3(6Z,9Z,12Z))', 'PC(19:1(9Z)/18:3(9Z,12Z,15Z))', 'PC(20:2(11Z,14Z)/17:2(9Z,12Z))', 'PC(20:3(8Z,11Z,14Z)/17:1(9Z))', 'PC(2…
854.592	15270.1	C47H86NO10P	[M-H]-	854.592	0.54	['PS(19:1(9Z)/22:2(13Z,16Z))', 'PS(20:3(8Z,11Z,14Z)/21:0)', 'PS(21:0/20:3(8Z,11Z,14Z))', 'PS(22:2(13Z,16Z)/19:1(9Z))']
855.483	6931.73	0
855.503	266526	C45H77O13P	[M-H]-	855.503	0.34	['PI(14:1(9Z)/22:4(7Z,10Z,13Z,16Z))', 'PI(16:0/20:5(5Z,8Z,11Z,14Z,17Z))', 'PI(16:1(9Z)/20:4(5Z,8Z,11Z,14Z))', 'PI(18:1(9Z)/18:4(6Z,9Z,12Z,15Z))', 'PI(18:2(9Z,12Z)/18:3(6Z,9Z,12Z))', 'PI(18:2(9Z,12Z)/18:3(9Z,12Z,15Z))', 'PI(18:3(6Z,9Z,12Z)/18:2(9Z,12Z))', 'PI(18:3(9Z,12Z,15Z)/18:2(9Z,12Z))', 'PI(18:4(6Z,9Z,12Z,15Z)/18:1(9Z))', 'PI(20:4(5Z,8Z,11Z,14Z)/16:1(9Z))', 'PI(20:5(5Z,8Z,11Z,14Z,17Z)/16:0)',…
855.533	1491.64	0
855.559	5334.59	C41H81O12P	[M+Hac-H]-	855.56	-1.23	['PI(O-16:0/16:0)', 'PI(O-18:0/14:0)', 'PI(O-20:0/12:0)']
855.632	3965.34	0
856.488	2524.34	C45H76NO10P	[M+Cl]-	856.49	-2.05	['PS(17:0/22:6(4Z,7Z,10Z,13Z,16Z,19Z))', 'PS(17:2(9Z,12Z)/22:4(7Z,10Z,13Z,16Z))', 'PS(19:1(9Z)/20:5(5Z,8Z,11Z,14Z,17Z))', 'PS(20:5(5Z,8Z,11Z,14Z,17Z)/19:1(9Z))', 'PS(22:4(7Z,10Z,13Z,16Z)/17:2(9Z,12Z))', 'PS(22:6(4Z,7Z,10Z,13Z,16Z,19Z)/17:0)']
856.507	132912	C46H78NO9P	[M+(37Cl)]-	856.508	-1.43	['PS(P-18:0/22:6(4Z,7Z,10Z,13Z,16Z,19Z))']
856.572	16803.5	C44H80NO9P	[M+Hac-H]-	856.571	1.03	['PC(16:0/20:4(5Z,8Z,10E,14Z)(12OH[S]))', 'PC(16:0/20:4(6E,8Z,11Z,14Z)(5OH[S]))', 'PS(O-16:0/22:4(7Z,10Z,13Z,16Z))', 'PS(O-18:0/20:4(5Z,8Z,11Z,14Z))', 'PS(O-20:0/18:4(6Z,9Z,12Z,15Z))', 'PS(P-18:0/20:3(8Z,11Z,14Z))', 'PS(P-20:0/18:3(6Z,9Z,12Z))', 'PS(P-20:0/18:3(9Z,12Z,15Z))']
856.608	19139.1	C45H84NO8P	[M+Hac-H]-	856.607	1.23	['PC(15:1(9Z)/22:2(13Z,16Z))', 'PC(17:0/20:3(8Z,11Z,14Z))', 'PC(17:1(9Z)/20:2(11Z,14Z))', 'PC(17:2(9Z,12Z)/20:1(11Z))', 'PC(18:2(9Z,12Z)/19:1(9Z))', 'PC(18:3(6Z,9Z,12Z)/19:0)', 'PC(18:3(9Z,12Z,15Z)/19:0)', 'PC(19:0/18:3(6Z,9Z,12Z))', 'PC(19:0/18:3(9Z,12Z,15Z))', 'PC(19:1(9Z)/18:2(9Z,12Z))', 'PC(20:1(11Z)/17:2(9Z,12Z))', 'PC(20:2(11Z,14Z)/17:1(9Z))', 'PC(20:3(8Z,11Z,14Z)/17:0)', 'PC(22:2(13Z,16Z)/…
856.608	19139.1	C47H88NO10P	[M-H]-	856.607	1.23	['PS(19:0/22:2(13Z,16Z))', 'PS(19:1(9Z)/22:1(11Z))', 'PS(20:2(11Z,14Z)/21:0)', 'PS(21:0/20:2(11Z,14Z))', 'PS(22:1(11Z)/19:1(9Z))', 'PS(22:2(13Z,16Z)/19:0)']
857.49	7175.68	C46H77O10P	[M+(37Cl)]-	857.492	-2.53	['PG(18:1(9Z)/22:6(4Z,7Z,10Z,13Z,16Z,19Z))', 'PG(18:3(6Z,9Z,12Z)/22:4(7Z,10Z,13Z,16Z))', 'PG(18:3(9Z,12Z,15Z)/22:4(7Z,10Z,13Z,16Z))', 'PG(20:2(11Z,14Z)/20:5(5Z,8Z,11Z,14Z,17Z))', 'PG(20:3(8Z,11Z,14Z)/20:4(5Z,8Z,11Z,14Z))', 'PG(20:4(5Z,8Z,11Z,14Z)/20:3(8Z,11Z,14Z))', 'PG(20:5(5Z,8Z,11Z,14Z,17Z)/20:2(11Z,14Z))', 'PG(22:4(7Z,10Z,13Z,16Z)/18:3(6Z,9Z,12Z))', 'PG(22:4(7Z,10Z,13Z,16Z)/18:3(9Z,12Z,15Z))'…
857.499	17292.2	C42H79O13P	[M+Cl]-	857.495	3.91	['PI(13:0/20:1(11Z))', 'PI(14:0/19:1(9Z))', 'PI(14:1(9Z)/19:0)', 'PI(15:0/18:1(9Z))', 'PI(15:1(9Z)/18:0)', 'PI(16:0/17:1(9Z))', 'PI(16:1(9Z)/17:0)', 'PI(17:0/16:1(9Z))', 'PI(17:1(9Z)/16:0)', 'PI(18:0/15:1(9Z))', 'PI(18:1(9Z)/15:0)', 'PI(19:0/14:1(9Z))', 'PI(19:1(9Z)/14:0)', 'PI(20:1(11Z)/13:0)']
857.519	792554	C45H79O13P	[M-H]-	857.519	-0.07	['PI(14:0/22:4(7Z,10Z,13Z,16Z))', 'PI(16:0/20:4(5Z,8Z,11Z,14Z))', 'PI(16:1(9Z)/20:3(8Z,11Z,14Z))', 'PI(18:0/18:4(6Z,9Z,12Z,15Z))', 'PI(18:1(9Z)/18:3(6Z,9Z,12Z))', 'PI(18:1(9Z)/18:3(9Z,12Z,15Z))', 'PI(18:2(9Z,12Z)/18:2(9Z,12Z))', 'PI(18:3(6Z,9Z,12Z)/18:1(9Z))', 'PI(18:3(9Z,12Z,15Z)/18:1(9Z))', 'PI(18:4(6Z,9Z,12Z,15Z)/18:0)', 'PI(20:3(8Z,11Z,14Z)/16:1(9Z))', 'PI(20:4(5Z,8Z,11Z,14Z)/16:0)', 'PI(22:4…
858.493	4843.35	0
858.522	394114	C46H80NO9P	[M+(37Cl)]-	858.524	-1.72	['PS(O-18:0/22:6(4Z,7Z,10Z,13Z,16Z,19Z))', 'PS(P-20:0/20:5(5Z,8Z,11Z,14Z,17Z))']
858.587	20157	C44H82NO9P	[M+Hac-H]-	858.587	0.86	['PS(O-18:0/20:3(8Z,11Z,14Z))', 'PS(O-20:0/18:3(6Z,9Z,12Z))', 'PS(O-20:0/18:3(9Z,12Z,15Z))', 'PS(P-16:0/22:2(13Z,16Z))', 'PS(P-18:0/20:2(11Z,14Z))', 'PS(P-20:0/18:2(9Z,12Z))']
858.624	9822.11	C45H86NO8P	[M+Hac-H]-	858.623	1.41	['PC(15:0/22:2(13Z,16Z))', 'PC(15:1(9Z)/22:1(11Z))', 'PC(17:0/20:2(11Z,14Z))', 'PC(17:1(9Z)/20:1(11Z))', 'PC(17:2(9Z,12Z)/20:0)', 'PC(18:1(9Z)/19:1(9Z))', 'PC(18:2(9Z,12Z)/19:0)', 'PC(19:0/18:2(9Z,12Z))', 'PC(19:1(9Z)/18:1(9Z))', 'PC(20:0/17:2(9Z,12Z))', 'PC(20:1(11Z)/17:1(9Z))', 'PC(20:2(11Z,14Z)/17:0)', 'PC(22:1(11Z)/15:1(9Z))', 'PC(22:2(13Z,16Z)/15:0)', 'PE(18:0/22:2(13Z,16Z))', 'PE(18:1(9Z)/2…
858.624	9822.11	C47H90NO10P	[M-H]-	858.623	1.41	['PS(19:0/22:1(11Z))', 'PS(19:1(9Z)/22:0)', 'PS(20:1(11Z)/21:0)', 'PS(21:0/20:1(11Z))', 'PS(22:0/19:1(9Z))', 'PS(22:1(11Z)/19:0)']
859.562	2115.87	0
859.59	9556.41	0
859.691	8233.81	C46H93N2O6P	[M+Hac-H]-	859.691	-0.49	['SM(d16:1/25:0)', 'SM(d17:1/24:0)', 'SM(d18:1/23:0)']
860.518	7697.72	C45H80NO10P	[M+Cl]-	860.521	-3.97	['PS(17:0/22:4(7Z,10Z,13Z,16Z))', 'PS(17:2(9Z,12Z)/22:2(13Z,16Z))', 'PS(18:4(6Z,9Z,12Z,15Z)/21:0)', 'PS(19:0/20:4(5Z,8Z,11Z,14Z))', 'PS(19:1(9Z)/20:3(8Z,11Z,14Z))', 'PS(20:3(8Z,11Z,14Z)/19:1(9Z))', 'PS(20:4(5Z,8Z,11Z,14Z)/19:0)', 'PS(21:0/18:4(6Z,9Z,12Z,15Z))', 'PS(22:2(13Z,16Z)/17:2(9Z,12Z))', 'PS(22:4(7Z,10Z,13Z,16Z)/17:0)']
861.519	6692.87	C42H74O14	[M+Hac-H]-	861.522	-2.95	['NA']
862.521	11292.1	C45H80NO10P	[M+(37Cl)]-	862.518	3.35	['PS(17:0/22:4(7Z,10Z,13Z,16Z))', 'PS(17:2(9Z,12Z)/22:2(13Z,16Z))', 'PS(18:4(6Z,9Z,12Z,15Z)/21:0)', 'PS(19:0/20:4(5Z,8Z,11Z,14Z))', 'PS(19:1(9Z)/20:3(8Z,11Z,14Z))', 'PS(20:3(8Z,11Z,14Z)/19:1(9Z))', 'PS(20:4(5Z,8Z,11Z,14Z)/19:0)', 'PS(21:0/18:4(6Z,9Z,12Z,15Z))', 'PS(22:2(13Z,16Z)/17:2(9Z,12Z))', 'PS(22:4(7Z,10Z,13Z,16Z)/17:0)']
862.534	3366.12	C45H82NO10P	[M+Cl]-	862.537	-3.98	['PS(17:1(9Z)/22:2(13Z,16Z))', 'PS(17:2(9Z,12Z)/22:1(11Z))', 'PS(18:3(6Z,9Z,12Z)/21:0)', 'PS(18:3(9Z,12Z,15Z)/21:0)', 'PS(19:0/20:3(8Z,11Z,14Z))', 'PS(19:1(9Z)/20:2(11Z,14Z))', 'PS(20:2(11Z,14Z)/19:1(9Z))', 'PS(20:3(8Z,11Z,14Z)/19:0)', 'PS(21:0/18:3(6Z,9Z,12Z))', 'PS(21:0/18:3(9Z,12Z,15Z))', 'PS(22:1(11Z)/17:2(9Z,12Z))', 'PS(22:2(13Z,16Z)/17:1(9Z))']
862.683	5167.19	0
863.524	3740.83	0
863.567	47246.6	C45H85O13P	[M-H]-	863.566	1.45	['PI(14:0/22:1(11Z))', 'PI(14:1(9Z)/22:0)', 'PI(15:1(9Z)/21:0)', 'PI(16:0/20:1(11Z))', 'PI(16:1(9Z)/20:0)', 'PI(17:0/19:1(9Z))', 'PI(17:1(9Z)/19:0)', 'PI(18:0/18:1(9Z))', 'PI(18:1(9Z)/18:0)', 'PI(19:0/17:1(9Z))', 'PI(19:1(9Z)/17:0)', 'PI(20:0/16:1(9Z))', 'PI(20:1(11Z)/16:0)', 'PI(21:0/15:1(9Z))', 'PI(22:0/14:1(9Z))', 'PI(22:1(11Z)/14:0)']
863.681	23119.9	C48H97N2O6P	[M+Cl]-	863.678	3.51	['SM(d18:1/25:0)', 'SM(d19:0/24:1)', 'SM(d19:1/24:0)', 'SM(d20:1/23:0)']
864.577	105313	C46H80NO8P	[M+Hac-H]-	864.576	0.66	['PC(16:0/22:6(4E,7E,10E,13E,16E,19E))', 'PC(16:0/22:6(4Z,7Z,10Z,13Z,16Z,19Z))', 'PC(18:1(11Z)/20:5(5Z,8Z,11Z,14Z,17Z))', 'PC(18:1(9Z)/20:5(5Z,8Z,11Z,14Z,17Z))', 'PC(18:2(9Z,12Z)/20:4(5Z,8Z,11Z,14Z))', 'PC(18:3(6Z,9Z,12Z)/20:3(8Z,11Z,14Z))', 'PC(18:3(9Z,12Z,15Z)/20:3(8Z,11Z,14Z))', 'PC(18:4(6Z,9Z,12Z,15Z)/20:2(11Z,14Z))', 'PC(20:2(11Z,14Z)/18:4(6Z,9Z,12Z,15Z))', 'PC(20:3(8Z,11Z,14Z)/18:3(6Z,9Z,12…
864.577	105313	C48H84NO10P	[M-H]-	864.576	0.66	['PS(20:1(11Z)/22:4(7Z,10Z,13Z,16Z))', 'PS(20:3(8Z,11Z,14Z)/22:2(13Z,16Z))', 'PS(20:4(5Z,8Z,11Z,14Z)/22:1(11Z))', 'PS(20:5(5Z,8Z,11Z,14Z,17Z)/22:0)', 'PS(22:0/20:5(5Z,8Z,11Z,14Z,17Z))', 'PS(22:1(11Z)/20:4(5Z,8Z,11Z,14Z))', 'PS(22:2(13Z,16Z)/20:3(8Z,11Z,14Z))', 'PS(22:4(7Z,10Z,13Z,16Z)/20:1(11Z))']
864.684	18144.6	0
865.58	57262.9	C45H87O13P	[M-H]-	865.581	-1.42	['PI(14:0/22:0)', 'PI(15:0/21:0)', 'PI(16:0/20:0)', 'PI(17:0/19:0)', 'PI(18:0/18:0)', 'PI(19:0/17:0)', 'PI(20:0/16:0)', 'PI(21:0/15:0)', 'PI(22:0/14:0)']
865.697	18820	0
866.555	62541.3	C45H78NO9P	[M+Hac-H]-	866.555	0.21	['PE(18:0/22:6(4Z,7Z,10Z,12E,16Z,19Z)(14OH))']
866.592	83723.6	C46H82NO8P	[M+Hac-H]-	866.592	0.95	['PC(16:0/22:5(4Z,7Z,10Z,13Z,16Z))', 'PC(16:0/22:5(7Z,10Z,13Z,16Z,19Z))', 'PC(16:1(9Z)/22:4(7Z,10Z,13Z,16Z))', 'PC(18:0/20:5(5Z,8Z,11Z,14Z,17Z))', 'PC(18:0/20:5(9Z,11Z,13Z,15Z,17Z))', 'PC(18:1(9Z)/20:4(5Z,8Z,11Z,14Z))', 'PC(18:2(9Z,12Z)/20:3(8Z,11Z,14Z))', 'PC(18:3(6Z,9Z,12Z)/20:2(11Z,14Z))', 'PC(18:3(9Z,12Z,15Z)/20:2(11Z,14Z))', 'PC(18:4(6Z,9Z,12Z,15Z)/20:1(11Z))', 'PC(20:1(11Z)/18:4(6Z,9Z,12Z,1…
866.592	83723.6	C48H86NO10P	[M-H]-	866.592	0.95	['PS(20:0/22:4(7Z,10Z,13Z,16Z))', 'PS(20:2(11Z,14Z)/22:2(13Z,16Z))', 'PS(20:3(8Z,11Z,14Z)/22:1(11Z))', 'PS(20:4(5Z,8Z,11Z,14Z)/22:0)', 'PS(22:0/20:4(5Z,8Z,11Z,14Z))', 'PS(22:1(11Z)/20:3(8Z,11Z,14Z))', 'PS(22:2(13Z,16Z)/20:2(11Z,14Z))', 'PS(22:4(7Z,10Z,13Z,16Z)/20:0)']
866.7	13679.6	0
867.559	32242.5	C42H81O12P	[M+Hac-H]-	867.56	-1.4	['PI(O-16:0/17:1(9Z))', 'PI(O-18:0/15:1(9Z))', 'PI(P-16:0/17:0)', 'PI(P-18:0/15:0)', 'PI(P-20:0/13:0)']
867.596	46540.6	0
868.532	12902.9	C44H76NO10P	[M+Hac-H]-	868.535	-2.58	['PS(16:1(9Z)/22:4(7Z,10Z,13Z,16Z))', 'PS(18:0/20:5(5Z,8Z,11Z,14Z,17Z))', 'PS(18:1(9Z)/20:4(5Z,8Z,11Z,14Z))', 'PS(18:2(9Z,12Z)/20:3(8Z,11Z,14Z))', 'PS(18:3(6Z,9Z,12Z)/20:2(11Z,14Z))', 'PS(18:3(9Z,12Z,15Z)/20:2(11Z,14Z))', 'PS(18:4(6Z,9Z,12Z,15Z)/20:1(11Z))', 'PS(20:1(11Z)/18:4(6Z,9Z,12Z,15Z))', 'PS(20:2(11Z,14Z)/18:3(6Z,9Z,12Z))', 'PS(20:2(11Z,14Z)/18:3(9Z,12Z,15Z))', 'PS(20:3(8Z,11Z,14Z)/18:2(9Z…
868.552	2052.38	C44H83NO13	[M+Cl]-	868.556	-3.87	['LacCer(d18:1/14:0)']
868.573	30509.3	0
868.59	2641.16	0
868.609	48790.7	C46H84NO8P	[M+Hac-H]-	868.607	1.44	['PC(16:0/22:4(7Z,10Z,13Z,16Z))', 'PC(18:0/20:4(5Z,8Z,11Z,14Z))', 'PC(18:0/20:4(8Z,10Z,12Z,14Z))', 'PC(18:1(9Z)/20:3(5Z,8Z,11Z))', 'PC(18:1(9Z)/20:3(8Z,11Z,14Z))', 'PC(18:2(9Z,12Z)/20:2(11Z,14Z))', 'PC(18:3(6Z,9Z,12Z)/20:1(11Z))', 'PC(18:3(9Z,12Z,15Z)/20:1(11Z))', 'PC(18:4(6Z,9Z,12Z,15Z)/20:0)', 'PC(20:0/18:4(6Z,9Z,12Z,15Z))', 'PC(20:1(11Z)/18:3(6Z,9Z,12Z))', 'PC(20:1(11Z)/18:3(9Z,12Z,15Z))', 'PC…
868.609	48790.7	C48H88NO10P	[M-H]-	868.607	1.44	['PS(20:1(11Z)/22:2(13Z,16Z))', 'PS(20:2(11Z,14Z)/22:1(11Z))', 'PS(20:3(8Z,11Z,14Z)/22:0)', 'PS(22:0/20:3(8Z,11Z,14Z))', 'PS(22:1(11Z)/20:2(11Z,14Z))', 'PS(22:2(13Z,16Z)/20:1(11Z))']
869.519	30995.6	C46H79O13P	[M-H]-	869.519	0.8	['PI(15:1(9Z)/22:4(7Z,10Z,13Z,16Z))', 'PI(17:0/20:5(5Z,8Z,11Z,14Z,17Z))', 'PI(17:1(9Z)/20:4(5Z,8Z,11Z,14Z))', 'PI(17:2(9Z,12Z)/20:3(8Z,11Z,14Z))', 'PI(18:4(6Z,9Z,12Z,15Z)/19:1(9Z))', 'PI(19:1(9Z)/18:4(6Z,9Z,12Z,15Z))', 'PI(20:3(8Z,11Z,14Z)/17:2(9Z,12Z))', 'PI(20:4(5Z,8Z,11Z,14Z)/17:1(9Z))', 'PI(20:5(5Z,8Z,11Z,14Z,17Z)/17:0)', 'PI(22:4(7Z,10Z,13Z,16Z)/15:1(9Z))']
869.575	18091.9	C42H83O12P	[M+Hac-H]-	869.576	-1.05	['PI(O-16:0/17:0)', 'PI(O-18:0/15:0)', 'PI(O-20:0/13:0)']
869.612	26637.7	0
870.482	9354.37	C49H74NO8P	[M+Cl]-	870.485	-2.61	['PE(22:6(4Z,7Z,10Z,13Z,16Z,19Z)/22:6(4Z,7Z,10Z,13Z,16Z,19Z))']
870.548	13666.9	C44H78NO10P	[M+Hac-H]-	870.55	-2.77	['PS(16:0/22:4(7Z,10Z,13Z,16Z))', 'PS(18:0/20:4(5Z,8Z,11Z,14Z))', 'PS(18:1(9Z)/20:3(8Z,11Z,14Z))', 'PS(18:2(9Z,12Z)/20:2(11Z,14Z))', 'PS(18:3(6Z,9Z,12Z)/20:1(11Z))', 'PS(18:3(9Z,12Z,15Z)/20:1(11Z))', 'PS(18:4(6Z,9Z,12Z,15Z)/20:0)', 'PS(20:0/18:4(6Z,9Z,12Z,15Z))', 'PS(20:1(11Z)/18:3(6Z,9Z,12Z))', 'PS(20:1(11Z)/18:3(9Z,12Z,15Z))', 'PS(20:2(11Z,14Z)/18:2(9Z,12Z))', 'PS(20:3(8Z,11Z,14Z)/18:1(9Z))', '…
870.588	20723.9	0
870.624	26587.9	C46H86NO8P	[M+Hac-H]-	870.623	1.44	['PC(16:1(9Z)/22:2(13Z,16Z))', 'PC(18:0/20:3(5Z,11Z,14Z))', 'PC(18:0/20:3(5Z,8Z,11Z))', 'PC(18:0/20:3(5Z,8Z,14Z))', 'PC(18:0/20:3(8Z,11Z,14Z))', 'PC(18:1(9Z)/20:2(11Z,14Z))', 'PC(18:2(9Z,12Z)/20:1(11Z))', 'PC(18:2(9Z,12Z)/20:1(13Z))', 'PC(18:3(6Z,9Z,12Z)/20:0)', 'PC(18:3(9Z,12Z,15Z)/20:0)', 'PC(20:0/18:3(6Z,9Z,12Z))', 'PC(20:0/18:3(9Z,12Z,15Z))', 'PC(20:1(11Z)/18:2(9Z,12Z))', 'PC(20:2(11Z,14Z)/18…
870.624	26587.9	C48H90NO10P	[M-H]-	870.623	1.44	['PS(20:0/22:2(13Z,16Z))', 'PS(20:1(11Z)/22:1(11Z))', 'PS(20:2(11Z,14Z)/22:0)', 'PS(22:0/20:2(11Z,14Z))', 'PS(22:1(11Z)/20:1(11Z))', 'PS(22:2(13Z,16Z)/20:0)']
871.536	37036.2	C46H81O13P	[M-H]-	871.534	1.53	['PI(15:0/22:4(7Z,10Z,13Z,16Z))', 'PI(17:0/20:4(5Z,8Z,11Z,14Z))', 'PI(17:1(9Z)/20:3(8Z,11Z,14Z))', 'PI(17:2(9Z,12Z)/20:2(11Z,14Z))', 'PI(18:3(6Z,9Z,12Z)/19:1(9Z))', 'PI(18:3(9Z,12Z,15Z)/19:1(9Z))', 'PI(18:4(6Z,9Z,12Z,15Z)/19:0)', 'PI(19:0/18:4(6Z,9Z,12Z,15Z))', 'PI(19:1(9Z)/18:3(6Z,9Z,12Z))', 'PI(19:1(9Z)/18:3(9Z,12Z,15Z))', 'PI(20:2(11Z,14Z)/17:2(9Z,12Z))', 'PI(20:3(8Z,11Z,14Z)/17:1(9Z))', 'PI(2…
871.592	10885.8	0
872.564	41086.8	C44H80NO10P	[M+Hac-H]-	872.566	-2.12	['PS(16:1(9Z)/22:2(13Z,16Z))', 'PS(18:0/20:3(8Z,11Z,14Z))', 'PS(18:1(9Z)/20:2(11Z,14Z))', 'PS(18:2(9Z,12Z)/20:1(11Z))', 'PS(18:3(6Z,9Z,12Z)/20:0)', 'PS(18:3(9Z,12Z,15Z)/20:0)', 'PS(20:0/18:3(6Z,9Z,12Z))', 'PS(20:0/18:3(9Z,12Z,15Z))', 'PS(20:1(11Z)/18:2(9Z,12Z))', 'PS(20:2(11Z,14Z)/18:1(9Z))', 'PS(20:3(8Z,11Z,14Z)/18:0)', 'PS(22:2(13Z,16Z)/16:1(9Z))']
872.639	14643.2	C46H88NO8P	[M+Hac-H]-	872.639	0.97	['PC(16:0/22:2(13Z,16Z))', 'PC(16:1(9Z)/22:1(11Z))', 'PC(17:2(9Z,12Z)/21:0)', 'PC(18:0/20:2(11Z,14Z))', 'PC(18:0/20:2(5Z,11Z))', 'PC(18:0/20:2(5Z,14Z))', 'PC(18:0/20:2(5Z,8Z))', 'PC(18:0/20:2(8Z,11Z))', 'PC(18:0/20:2(8Z,14Z))', 'PC(18:1(11Z)/20:1(13Z))', 'PC(18:1(9Z)/20:1(11Z))', 'PC(18:2(9Z,12Z)/20:0)', 'PC(19:1(9Z)/19:1(9Z))', 'PC(20:0/18:2(9Z,12Z))', 'PC(20:1(11Z)/18:1(9Z))', 'PC(20:2(11Z,14Z)…
872.639	14643.2	C48H92NO10P	[M-H]-	872.639	0.97	['PS(20:0/22:1(11Z))', 'PS(20:1(11Z)/22:0)', 'PS(22:0/20:1(11Z))', 'PS(22:1(11Z)/20:0)']
873.643	8125.6	0
873.707	11564	C47H95N2O6P	[M+Hac-H]-	873.707	0.28	['SM(d18:0/24:1(15Z))', 'SM(d18:1/24:0)']
874.581	16203.2	C44H82NO10P	[M+Hac-H]-	874.581	-0.57	['PS(16:0/22:2(13Z,16Z))', 'PS(16:1(9Z)/22:1(11Z))', 'PS(17:2(9Z,12Z)/21:0)', 'PS(18:0/20:2(11Z,14Z))', 'PS(18:1(9Z)/20:1(11Z))', 'PS(18:2(9Z,12Z)/20:0)', 'PS(19:1(9Z)/19:1(9Z))', 'PS(20:0/18:2(9Z,12Z))', 'PS(20:1(11Z)/18:1(9Z))', 'PS(20:2(11Z,14Z)/18:0)', 'PS(21:0/17:2(9Z,12Z))', 'PS(22:1(11Z)/16:1(9Z))', 'PS(22:2(13Z,16Z)/16:0)']
876.499	16520	0
877.58	7719.6	C46H87O13P	[M-H]-	877.581	-1.14	['PI(15:0/22:1(11Z))', 'PI(15:1(9Z)/22:0)', 'PI(16:1(9Z)/21:0)', 'PI(17:0/20:1(11Z))', 'PI(17:1(9Z)/20:0)', 'PI(18:0/19:1(9Z))', 'PI(18:1(9Z)/19:0)', 'PI(19:0/18:1(9Z))', 'PI(19:1(9Z)/18:0)', 'PI(20:0/17:1(9Z))', 'PI(20:1(11Z)/17:0)', 'PI(21:0/16:1(9Z))', 'PI(22:0/15:1(9Z))', 'PI(22:1(11Z)/15:0)']
878.592	12363.2	C47H82NO8P	[M+Hac-H]-	878.592	0.32	['PC(17:0/22:6(4Z,7Z,10Z,13Z,16Z,19Z))', 'PC(17:2(9Z,12Z)/22:4(7Z,10Z,13Z,16Z))', 'PC(19:1(9Z)/20:5(5Z,8Z,11Z,14Z,17Z))', 'PC(20:5(5Z,8Z,11Z,14Z,17Z)/19:1(9Z))', 'PC(22:4(7Z,10Z,13Z,16Z)/17:2(9Z,12Z))', 'PC(22:6(4Z,7Z,10Z,13Z,16Z,19Z)/17:0)', 'PE(20:0/22:6(4Z,7Z,10Z,13Z,16Z,19Z))', 'PE(20:2(11Z,14Z)/22:4(7Z,10Z,13Z,16Z))', 'PE(20:4(5Z,8Z,11Z,14Z)/22:2(13Z,16Z))', 'PE(20:5(5Z,8Z,11Z,14Z,17Z)/22:1(…
879.504	104312	C47H77O13P	[M-H]-	879.503	0.82	['PI(16:1(9Z)/22:6(4Z,7Z,10Z,13Z,16Z,19Z))', 'PI(18:2(9Z,12Z)/20:5(5Z,8Z,11Z,14Z,17Z))', 'PI(18:3(6Z,9Z,12Z)/20:4(5Z,8Z,11Z,14Z))', 'PI(18:3(9Z,12Z,15Z)/20:4(5Z,8Z,11Z,14Z))', 'PI(18:4(6Z,9Z,12Z,15Z)/20:3(8Z,11Z,14Z))', 'PI(20:3(8Z,11Z,14Z)/18:4(6Z,9Z,12Z,15Z))', 'PI(20:4(5Z,8Z,11Z,14Z)/18:3(6Z,9Z,12Z))', 'PI(20:4(5Z,8Z,11Z,14Z)/18:3(9Z,12Z,15Z))', 'PI(20:5(5Z,8Z,11Z,14Z,17Z)/18:2(9Z,12Z))', 'PI(…
879.596	6104.58	C46H89O13P	[M-H]-	879.597	-1.14	['PI(15:0/22:0)', 'PI(16:0/21:0)', 'PI(17:0/20:0)', 'PI(18:0/19:0)', 'PI(19:0/18:0)', 'PI(20:0/17:0)', 'PI(21:0/16:0)', 'PI(22:0/15:0)']
880.507	55484.1	0
880.532	8010.75	C45H76NO10P	[M+Hac-H]-	880.535	-3.36	['PS(17:0/22:6(4Z,7Z,10Z,13Z,16Z,19Z))', 'PS(17:2(9Z,12Z)/22:4(7Z,10Z,13Z,16Z))', 'PS(19:1(9Z)/20:5(5Z,8Z,11Z,14Z,17Z))', 'PS(20:5(5Z,8Z,11Z,14Z,17Z)/19:1(9Z))', 'PS(22:4(7Z,10Z,13Z,16Z)/17:2(9Z,12Z))', 'PS(22:6(4Z,7Z,10Z,13Z,16Z,19Z)/17:0)']
880.571	30485	C46H80NO9P	[M+Hac-H]-	880.571	0.05	['PS(O-18:0/22:6(4Z,7Z,10Z,13Z,16Z,19Z))', 'PS(P-20:0/20:5(5Z,8Z,11Z,14Z,17Z))']
880.608	9069.69	C47H84NO8P	[M+Hac-H]-	880.607	0.33	['PC(16:0/23:5(8E,11E,14E,17E,20E))', 'PC(17:0/22:5(7Z,10Z,13Z,16Z,19Z))', 'PC(17:1(9Z)/22:4(7Z,10Z,13Z,16Z))', 'PC(19:0/20:5(5Z,8Z,11Z,14Z,17Z))', 'PC(19:1(9Z)/20:4(5Z,8Z,11Z,14Z))', 'PC(20:4(5Z,8Z,11Z,14Z)/19:1(9Z))', 'PC(20:5(5Z,8Z,11Z,14Z,17Z)/19:0)', 'PC(22:4(7Z,10Z,13Z,16Z)/17:1(9Z))', 'PE(20:1(11Z)/22:4(7Z,10Z,13Z,16Z))', 'PE(20:3(8Z,11Z,14Z)/22:2(13Z,16Z))', 'PE(20:4(5Z,8Z,11Z,14Z)/22:1(1…
880.608	9069.69	C49H88NO10P	[M-H]-	880.607	0.33	['PS(21:0/22:4(7Z,10Z,13Z,16Z))', 'PS(22:4(7Z,10Z,13Z,16Z)/21:0)']
881.498	12334.2	C44H79O13P	[M+Cl]-	881.495	2.98	['PI(15:0/20:3(8Z,11Z,14Z))', 'PI(15:1(9Z)/20:2(11Z,14Z))', 'PI(17:0/18:3(6Z,9Z,12Z))', 'PI(17:0/18:3(9Z,12Z,15Z))', 'PI(17:1(9Z)/18:2(9Z,12Z))', 'PI(17:2(9Z,12Z)/18:1(9Z))', 'PI(18:1(9Z)/17:2(9Z,12Z))', 'PI(18:2(9Z,12Z)/17:1(9Z))', 'PI(18:3(6Z,9Z,12Z)/17:0)', 'PI(18:3(9Z,12Z,15Z)/17:0)', 'PI(20:2(11Z,14Z)/15:1(9Z))', 'PI(20:3(8Z,11Z,14Z)/15:0)']
881.518	452648	C47H79O13P	[M-H]-	881.519	-0.15	['PI(16:0/22:6(4Z,7Z,10Z,13Z,16Z,19Z))', 'PI(18:1(9Z)/20:5(5Z,8Z,11Z,14Z,17Z))', 'PI(18:2(9Z,12Z)/20:4(5Z,8Z,11Z,14Z))', 'PI(18:3(6Z,9Z,12Z)/20:3(8Z,11Z,14Z))', 'PI(18:3(9Z,12Z,15Z)/20:3(8Z,11Z,14Z))', 'PI(18:4(6Z,9Z,12Z,15Z)/20:2(11Z,14Z))', 'PI(20:2(11Z,14Z)/18:4(6Z,9Z,12Z,15Z))', 'PI(20:3(8Z,11Z,14Z)/18:3(6Z,9Z,12Z))', 'PI(20:3(8Z,11Z,14Z)/18:3(9Z,12Z,15Z))', 'PI(20:4(5Z,8Z,11Z,14Z)/18:2(9Z,12…
881.573	14812.5	C43H83O12P	[M+Hac-H]-	881.576	-3.16	['PI(O-16:0/18:1(9Z))', 'PI(O-18:0/16:1(9Z))', 'PI(O-20:0/14:1(9Z))', 'PI(P-16:0/18:0)', 'PI(P-18:0/16:0)', 'PI(P-20:0/14:0)']
881.573	14812.5	C56H82O6S	[M-H]-	881.576	-3	['Sulfated Dihydromenaquinone-9']
882.522	234661	0
882.546	22307.9	0
882.587	18730.2	C46H82NO9P	[M+Hac-H]-	882.587	0.48	['PE(18:0/20:4(5Z,8Z,11Z,13E)(15Ke))', 'PS(O-20:0/20:5(5Z,8Z,11Z,14Z,17Z))', 'PS(P-18:0/22:4(7Z,10Z,13Z,16Z))', 'PS(P-20:0/20:4(5Z,8Z,11Z,14Z))']
882.624	3833.21	C47H86NO8P	[M+Hac-H]-	882.623	0.68	['PC(17:0/22:4(7Z,10Z,13Z,16Z))', 'PC(17:2(9Z,12Z)/22:2(13Z,16Z))', 'PC(18:4(6Z,9Z,12Z,15Z)/21:0)', 'PC(19:0/20:4(5Z,8Z,11Z,14Z))', 'PC(19:1(9Z)/20:3(8Z,11Z,14Z))', 'PC(20:3(8Z,11Z,14Z)/19:1(9Z))', 'PC(20:4(5Z,8Z,11Z,14Z)/19:0)', 'PC(21:0/18:4(6Z,9Z,12Z,15Z))', 'PC(22:2(13Z,16Z)/17:2(9Z,12Z))', 'PC(22:4(7Z,10Z,13Z,16Z)/17:0)', 'PE(20:0/22:4(7Z,10Z,13Z,16Z))', 'PE(20:2(11Z,14Z)/22:2(13Z,16Z))', 'P…
883.534	675938	C47H81O13P	[M-H]-	883.534	-0.08	['PI(16:1(9Z)/22:4(7Z,10Z,13Z,16Z))', 'PI(18:0/20:5(5Z,8Z,11Z,14Z,17Z))', 'PI(18:1(9Z)/20:4(5Z,8Z,11Z,14Z))', 'PI(18:2(9Z,12Z)/20:3(8Z,11Z,14Z))', 'PI(18:3(6Z,9Z,12Z)/20:2(11Z,14Z))', 'PI(18:3(9Z,12Z,15Z)/20:2(11Z,14Z))', 'PI(18:4(6Z,9Z,12Z,15Z)/20:1(11Z))', 'PI(20:1(11Z)/18:4(6Z,9Z,12Z,15Z))', 'PI(20:2(11Z,14Z)/18:3(6Z,9Z,12Z))', 'PI(20:2(11Z,14Z)/18:3(9Z,12Z,15Z))', 'PI(20:3(8Z,11Z,14Z)/18:2(9Z…
883.564	3283.3	0
883.589	8421.55	C43H85O12P	[M+Hac-H]-	883.592	-3.46	['PI(O-16:0/18:0)', 'PI(O-18:0/16:0)', 'PI(O-20:0/14:0)']
884.505	8465.52	C47H78NO10P	[M+(37Cl)]-	884.503	2.52	['PS(19:1(9Z)/22:6(4Z,7Z,10Z,13Z,16Z,19Z))', 'PS(22:6(4Z,7Z,10Z,13Z,16Z,19Z)/19:1(9Z))']
884.538	354442	C48H82NO9P	[M+(37Cl)]-	884.539	-1.45	['PS(P-20:0/22:6(4Z,7Z,10Z,13Z,16Z,19Z))']
884.561	12685.1	0
884.639	4900.46	C47H88NO8P	[M+Hac-H]-	884.639	0.04	['PC(17:1(9Z)/22:2(13Z,16Z))', 'PC(17:2(9Z,12Z)/22:1(11Z))', 'PC(18:3(6Z,9Z,12Z)/21:0)', 'PC(18:3(9Z,12Z,15Z)/21:0)', 'PC(19:0/20:3(8Z,11Z,14Z))', 'PC(19:1(9Z)/20:2(11Z,14Z))', 'PC(20:2(11Z,14Z)/19:1(9Z))', 'PC(20:3(8Z,11Z,14Z)/19:0)', 'PC(21:0/18:3(6Z,9Z,12Z))', 'PC(21:0/18:3(9Z,12Z,15Z))', 'PC(22:1(11Z)/17:2(9Z,12Z))', 'PC(22:2(13Z,16Z)/17:1(9Z))', 'PE(20:1(11Z)/22:2(13Z,16Z))', 'PE(20:2(11Z,14…
884.639	4900.46	C49H92NO10P	[M-H]-	884.639	0.04	['PS(21:0/22:2(13Z,16Z))', 'PS(22:2(13Z,16Z)/21:0)']
885.551	328651	C47H83O13P	[M-H]-	885.55	0.84	['Glc-GP(18:0/20:4(5Z,8Z,11Z,14Z))', 'PI(16:0/22:4(7Z,10Z,13Z,16Z))', 'PI(18:0/20:4(5Z,8Z,11Z,14Z))', 'PI(18:1(9Z)/20:3(8Z,11Z,14Z))', 'PI(18:2(9Z,12Z)/20:2(11Z,14Z))', 'PI(18:3(6Z,9Z,12Z)/20:1(11Z))', 'PI(18:3(9Z,12Z,15Z)/20:1(11Z))', 'PI(18:4(6Z,9Z,12Z,15Z)/20:0)', 'PI(20:0/18:4(6Z,9Z,12Z,15Z))', 'PI(20:1(11Z)/18:3(6Z,9Z,12Z))', 'PI(20:1(11Z)/18:3(9Z,12Z,15Z))', 'PI(20:2(11Z,14Z)/18:2(9Z,12Z))'…
886.521	6177.21	C47H80NO10P	[M+(37Cl)]-	886.518	3.21	['PS(19:0/22:6(4Z,7Z,10Z,13Z,16Z,19Z))', 'PS(22:6(4Z,7Z,10Z,13Z,16Z,19Z)/19:0)']
886.554	181690	C48H84NO9P	[M+(37Cl)]-	886.555	-1.2	['PS(O-20:0/22:6(4Z,7Z,10Z,13Z,16Z,19Z))']
886.578	14335.5	0
887.532	23359.6	0
887.551	19749.5	0
887.569	54281.6	C47H85O13P	[M-H]-	887.566	3.85	['PI(16:1(9Z)/22:2(13Z,16Z))', 'PI(18:0/20:3(8Z,11Z,14Z))', 'PI(18:1(9Z)/20:2(11Z,14Z))', 'PI(18:2(9Z,12Z)/20:1(11Z))', 'PI(18:3(6Z,9Z,12Z)/20:0)', 'PI(18:3(9Z,12Z,15Z)/20:0)', 'PI(20:0/18:3(6Z,9Z,12Z))', 'PI(20:0/18:3(9Z,12Z,15Z))', 'PI(20:1(11Z)/18:2(9Z,12Z))', 'PI(20:2(11Z,14Z)/18:1(9Z))', 'PI(20:3(8Z,11Z,14Z)/18:0)', 'PI(22:2(13Z,16Z)/16:1(9Z))']
888.499	20350.3	0
888.535	16168	C47H82NO10P	[M+(37Cl)]-	888.534	0.81	['PS(19:1(9Z)/22:4(7Z,10Z,13Z,16Z))', 'PS(20:5(5Z,8Z,11Z,14Z,17Z)/21:0)', 'PS(21:0/20:5(5Z,8Z,11Z,14Z,17Z))', 'PS(22:4(7Z,10Z,13Z,16Z)/19:1(9Z))']
888.535	16168	C50H80NO8P	[M+Cl]-	888.532	3.66	['PC(20:4(5Z,8Z,11Z,14Z)/22:6(4Z,7Z,10Z,13Z,16Z,19Z))', 'PC(20:5(5Z,8Z,11Z,14Z,17Z)/22:5(7Z,10Z,13Z,16Z,19Z))', 'PC(22:6(4Z,7Z,10Z,13Z,16Z,19Z)/20:4(5Z,8Z,11Z,14Z))']
888.57	31094.6	C48H86NO9P	[M+(37Cl)]-	888.57	-0.07	['PS(P-20:0/22:4(7Z,10Z,13Z,16Z))']
889.547	22176.2	0
889.583	39720.6	C47H87O13P	[M-H]-	889.581	1.52	['PI(16:0/22:2(13Z,16Z))', 'PI(16:1(9Z)/22:1(11Z))', 'PI(17:2(9Z,12Z)/21:0)', 'PI(18:0/20:2(11Z,14Z))', 'PI(18:1(9Z)/20:1(11Z))', 'PI(18:2(9Z,12Z)/20:0)', 'PI(19:1(9Z)/19:1(9Z))', 'PI(20:0/18:2(9Z,12Z))', 'PI(20:1(11Z)/18:1(9Z))', 'PI(20:2(11Z,14Z)/18:0)', 'PI(21:0/17:2(9Z,12Z))', 'PI(22:1(11Z)/16:1(9Z))', 'PI(22:2(13Z,16Z)/16:0)']
890.517	13976	C46H74NO10P	[M+Hac-H]-	890.519	-1.84	['PS(18:2(9Z,12Z)/22:6(4Z,7Z,10Z,13Z,16Z,19Z))', 'PS(18:4(6Z,9Z,12Z,15Z)/22:4(7Z,10Z,13Z,16Z))', 'PS(20:3(8Z,11Z,14Z)/20:5(5Z,8Z,11Z,14Z,17Z))', 'PS(20:4(5Z,8Z,11Z,14Z)/20:4(5Z,8Z,11Z,14Z))', 'PS(20:5(5Z,8Z,11Z,14Z,17Z)/20:3(8Z,11Z,14Z))', 'PS(22:4(7Z,10Z,13Z,16Z)/18:4(6Z,9Z,12Z,15Z))', 'PS(22:6(4Z,7Z,10Z,13Z,16Z,19Z)/18:2(9Z,12Z))']
890.585	19052.1	C48H88NO9P	[M+(37Cl)]-	890.586	-1.47	['PS(O-20:0/22:4(7Z,10Z,13Z,16Z))']
891.519	9567.07	0
891.598	20124.3	C47H89O13P	[M-H]-	891.597	1.54	['PI(16:0/22:1(11Z))', 'PI(16:1(9Z)/22:0)', 'PI(17:1(9Z)/21:0)', 'PI(18:0/20:1(11Z))', 'PI(18:1(9Z)/20:0)', 'PI(19:0/19:1(9Z))', 'PI(19:1(9Z)/19:0)', 'PI(20:0/18:1(9Z))', 'PI(20:1(11Z)/18:0)', 'PI(21:0/17:1(9Z))', 'PI(22:0/16:1(9Z))', 'PI(22:1(11Z)/16:0)']
892.466	14842.8	0
892.533	12421.4	C46H76NO10P	[M+Hac-H]-	892.535	-2.21	['PS(18:1(9Z)/22:6(4Z,7Z,10Z,13Z,16Z,19Z))', 'PS(18:3(6Z,9Z,12Z)/22:4(7Z,10Z,13Z,16Z))', 'PS(18:3(9Z,12Z,15Z)/22:4(7Z,10Z,13Z,16Z))', 'PS(20:2(11Z,14Z)/20:5(5Z,8Z,11Z,14Z,17Z))', 'PS(20:3(8Z,11Z,14Z)/20:4(5Z,8Z,11Z,14Z))', 'PS(20:4(5Z,8Z,11Z,14Z)/20:3(8Z,11Z,14Z))', 'PS(20:5(5Z,8Z,11Z,14Z,17Z)/20:2(11Z,14Z))', 'PS(22:4(7Z,10Z,13Z,16Z)/18:3(6Z,9Z,12Z))', 'PS(22:4(7Z,10Z,13Z,16Z)/18:3(9Z,12Z,15Z))'…
893.469	6271.62	0
893.535	7117.22	C50H84O7P2	[M+Cl]-	893.539	-3.96	['(2Z,6Z,10Z,14Z,18Z,22Z,26Z,30Z,34E)-Decaprenyl diphosphate', 'di-trans,poly-cis-decaprenyl diphosphate']
894.483	19170.3	0
894.549	32672.5	C46H78NO10P	[M+Hac-H]-	894.55	-1.81	['PS(18:0/22:6(4Z,7Z,10Z,13Z,16Z,19Z))', 'PS(18:2(9Z,12Z)/22:4(7Z,10Z,13Z,16Z))', 'PS(18:4(6Z,9Z,12Z,15Z)/22:2(13Z,16Z))', 'PS(20:1(11Z)/20:5(5Z,8Z,11Z,14Z,17Z))', 'PS(20:2(11Z,14Z)/20:4(5Z,8Z,11Z,14Z))', 'PS(20:3(8Z,11Z,14Z)/20:3(8Z,11Z,14Z))', 'PS(20:4(5Z,8Z,11Z,14Z)/20:2(11Z,14Z))', 'PS(20:5(5Z,8Z,11Z,14Z,17Z)/20:1(11Z))', 'PS(22:2(13Z,16Z)/18:4(6Z,9Z,12Z,15Z))', 'PS(22:4(7Z,10Z,13Z,16Z)/18:2(…
894.587	12651.8	0
894.624	10986.4	C48H86NO8P	[M+Hac-H]-	894.623	1.18	['PC(18:0/22:5(4Z,7Z,10Z,13Z,16Z))', 'PC(18:0/22:5(7Z,10Z,13Z,16Z,19Z))', 'PC(18:1(9Z)/22:4(7Z,10Z,13Z,16Z))', 'PC(18:3(6Z,9Z,12Z)/22:2(13Z,16Z))', 'PC(18:3(9Z,12Z,15Z)/22:2(13Z,16Z))', 'PC(18:4(6Z,9Z,12Z,15Z)/22:1(11Z))', 'PC(20:0/20:5(5Z,8Z,11Z,14Z,17Z))', 'PC(20:1(11Z)/20:4(5Z,8Z,11Z,14Z))', 'PC(20:2(11Z,14Z)/20:3(8Z,11Z,14Z))', 'PC(20:3(8Z,11Z,14Z)/20:2(11Z,14Z))', 'PC(20:4(5Z,8Z,11Z,14Z)/20:…
894.624	10986.4	C50H90NO10P	[M-H]-	894.623	1.18	['PS(22:0/22:4(7Z,10Z,13Z,16Z))', 'PS(22:2(13Z,16Z)/22:2(13Z,16Z))', 'PS(22:4(7Z,10Z,13Z,16Z)/22:0)']
895.551	18090.8	0
895.628	4577.59	0
896.498	31012.6	0
896.564	125141	C46H80NO10P	[M+Hac-H]-	896.566	-2.31	['PS(18:1(9Z)/22:4(7Z,10Z,13Z,16Z))', 'PS(18:3(6Z,9Z,12Z)/22:2(13Z,16Z))', 'PS(18:3(9Z,12Z,15Z)/22:2(13Z,16Z))', 'PS(18:4(6Z,9Z,12Z,15Z)/22:1(11Z))', 'PS(20:0/20:5(5Z,8Z,11Z,14Z,17Z))', 'PS(20:1(11Z)/20:4(5Z,8Z,11Z,14Z))', 'PS(20:2(11Z,14Z)/20:3(8Z,11Z,14Z))', 'PS(20:3(8Z,11Z,14Z)/20:2(11Z,14Z))', 'PS(20:4(5Z,8Z,11Z,14Z)/20:1(11Z))', 'PS(20:5(5Z,8Z,11Z,14Z,17Z)/20:0)', 'PS(22:1(11Z)/18:4(6Z,9Z,12…
896.639	9603.06	C48H88NO8P	[M+Hac-H]-	896.639	0.61	['PC(18:0/22:4(7Z,10Z,13Z,16Z))', 'PC(18:2(9Z,12Z)/22:2(13Z,16Z))', 'PC(18:3(6Z,9Z,12Z)/22:1(11Z))', 'PC(18:3(9Z,12Z,15Z)/22:1(11Z))', 'PC(18:4(6Z,9Z,12Z,15Z)/22:0)', 'PC(20:0/20:4(5Z,8Z,11Z,14Z))', 'PC(20:1(11Z)/20:3(8Z,11Z,14Z))', 'PC(20:2(11E,14E)/20:2(11E,14E))', 'PC(20:2(11Z,14Z)/20:2(11Z,14Z))', 'PC(20:3(8Z,11Z,14Z)/20:1(11Z))', 'PC(20:4(5Z,8Z,11Z,14Z)/20:0)', 'PC(22:0/18:4(6Z,9Z,12Z,15Z))'…
896.639	9603.06	C50H92NO10P	[M-H]-	896.639	0.61	['PS(22:1(11Z)/22:2(13Z,16Z))', 'PS(22:2(13Z,16Z)/22:1(11Z))']
897.5	16214.4	0
897.567	63934.3	0
898.515	15130	C48H80NO10P	[M+(37Cl)]-	898.518	-3.87	['PS(20:1(11Z)/22:6(4Z,7Z,10Z,13Z,16Z,19Z))', 'PS(20:3(8Z,11Z,14Z)/22:4(7Z,10Z,13Z,16Z))', 'PS(20:5(5Z,8Z,11Z,14Z,17Z)/22:2(13Z,16Z))', 'PS(22:2(13Z,16Z)/20:5(5Z,8Z,11Z,14Z,17Z))', 'PS(22:4(7Z,10Z,13Z,16Z)/20:3(8Z,11Z,14Z))', 'PS(22:6(4Z,7Z,10Z,13Z,16Z,19Z)/20:1(11Z))']
898.581	57052.1	C46H82NO10P	[M+Hac-H]-	898.581	-1	['PS(18:0/22:4(7Z,10Z,13Z,16Z))', 'PS(18:2(9Z,12Z)/22:2(13Z,16Z))', 'PS(18:3(6Z,9Z,12Z)/22:1(11Z))', 'PS(18:3(9Z,12Z,15Z)/22:1(11Z))', 'PS(18:4(6Z,9Z,12Z,15Z)/22:0)', 'PS(20:0/20:4(5Z,8Z,11Z,14Z))', 'PS(20:1(11Z)/20:3(8Z,11Z,14Z))', 'PS(20:2(11Z,14Z)/20:2(11Z,14Z))', 'PS(20:3(8Z,11Z,14Z)/20:1(11Z))', 'PS(20:4(5Z,8Z,11Z,14Z)/20:0)', 'PS(22:0/18:4(6Z,9Z,12Z,15Z))', 'PS(22:1(11Z)/18:3(6Z,9Z,12Z))', …
898.654	11227.8	C48H90NO8P	[M+Hac-H]-	898.654	0.23	['PC(18:0/22:3(10Z,13Z,16Z))', 'PC(18:1(9Z)/22:2(13Z,16Z))', 'PC(18:2(9Z,12Z)/22:1(11Z))', 'PC(18:3(6Z,9Z,12Z)/22:0)', 'PC(18:3(9Z,12Z,15Z)/22:0)', 'PC(20:0/20:3(11Z,14Z,17Z))', 'PC(20:0/20:3(8Z,11Z,14Z))', 'PC(20:1(11Z)/20:2(11Z,14Z))', 'PC(20:2(11Z,14Z)/20:1(11Z))', 'PC(20:3(8Z,11Z,14Z)/20:0)', 'PC(22:0/18:3(6Z,9Z,12Z))', 'PC(22:0/18:3(9Z,12Z,15Z))', 'PC(22:1(11Z)/18:2(9Z,12Z))', 'PC(22:2(13Z,1…
898.654	11227.8	C50H94NO10P	[M-H]-	898.654	0.23	['PS(22:0/22:2(13Z,16Z))', 'PS(22:1(11Z)/22:1(11Z))', 'PS(22:2(13Z,16Z)/22:0)']
899.488	11987.9	0
899.583	33730	0
899.646	13051.9	0
900.5	29987.6	0
900.596	51465.1	C46H84NO10P	[M+Hac-H]-	900.597	-1.53	['PS(18:1(9Z)/22:2(13Z,16Z))', 'PS(18:2(9Z,12Z)/22:1(11Z))', 'PS(18:3(6Z,9Z,12Z)/22:0)', 'PS(18:3(9Z,12Z,15Z)/22:0)', 'PS(20:0/20:3(8Z,11Z,14Z))', 'PS(20:1(11Z)/20:2(11Z,14Z))', 'PS(20:2(11Z,14Z)/20:1(11Z))', 'PS(20:3(8Z,11Z,14Z)/20:0)', 'PS(22:0/18:3(6Z,9Z,12Z))', 'PS(22:0/18:3(9Z,12Z,15Z))', 'PS(22:1(11Z)/18:2(9Z,12Z))', 'PS(22:2(13Z,16Z)/18:1(9Z))']
901.502	13509.6	C47H79O12P	[M+Cl]-	901.5	2.39	['PI(P-16:0/22:6(4Z,7Z,10Z,13Z,16Z,19Z))']
901.545	23711.2	C45H79O12P	[M+Hac-H]-	901.545	0.66	['PI(O-16:0/20:5(5Z,8Z,11Z,14Z,17Z))', 'PI(P-16:0/20:4(5Z,8Z,11Z,14Z))', 'PI(P-18:0/18:4(6Z,9Z,12Z,15Z))']
901.599	30539	0
902.515	48043.1	0
902.549	15544.8	C48H84NO10P	[M+(37Cl)]-	902.55	-1.12	['PS(20:1(11Z)/22:4(7Z,10Z,13Z,16Z))', 'PS(20:3(8Z,11Z,14Z)/22:2(13Z,16Z))', 'PS(20:4(5Z,8Z,11Z,14Z)/22:1(11Z))', 'PS(20:5(5Z,8Z,11Z,14Z,17Z)/22:0)', 'PS(22:0/20:5(5Z,8Z,11Z,14Z,17Z))', 'PS(22:1(11Z)/20:4(5Z,8Z,11Z,14Z))', 'PS(22:2(13Z,16Z)/20:3(8Z,11Z,14Z))', 'PS(22:4(7Z,10Z,13Z,16Z)/20:1(11Z))']
903.518	25641.9	C47H81O12P	[M+Cl]-	903.516	1.95	['PI(O-16:0/22:6(4Z,7Z,10Z,13Z,16Z,19Z))', 'PI(P-18:0/20:5(5Z,8Z,11Z,14Z,17Z))']
903.562	22238.5	C45H81O12P	[M+Hac-H]-	903.56	1.24	['PI(O-16:0/20:4(5Z,8Z,11Z,14Z))', 'PI(O-18:0/18:4(6Z,9Z,12Z,15Z))', 'PI(P-16:0/20:3(8Z,11Z,14Z))', 'PI(P-18:0/18:3(6Z,9Z,12Z))', 'PI(P-18:0/18:3(9Z,12Z,15Z))']
904.532	35879.6	0
904.564	8889.9	C48H86NO10P	[M+(37Cl)]-	904.565	-1.08	['PS(20:0/22:4(7Z,10Z,13Z,16Z))', 'PS(20:2(11Z,14Z)/22:2(13Z,16Z))', 'PS(20:3(8Z,11Z,14Z)/22:1(11Z))', 'PS(20:4(5Z,8Z,11Z,14Z)/22:0)', 'PS(22:0/20:4(5Z,8Z,11Z,14Z))', 'PS(22:1(11Z)/20:3(8Z,11Z,14Z))', 'PS(22:2(13Z,16Z)/20:2(11Z,14Z))', 'PS(22:4(7Z,10Z,13Z,16Z)/20:0)']
904.871	4625.3	0
906.548	24505.2	C47H78NO10P	[M+Hac-H]-	906.55	-2.32	['PS(19:1(9Z)/22:6(4Z,7Z,10Z,13Z,16Z,19Z))', 'PS(22:6(4Z,7Z,10Z,13Z,16Z,19Z)/19:1(9Z))']
908.565	22060.8	C47H80NO10P	[M+Hac-H]-	908.566	-1.27	['PS(19:0/22:6(4Z,7Z,10Z,13Z,16Z,19Z))', 'PS(22:6(4Z,7Z,10Z,13Z,16Z,19Z)/19:0)']
908.602	9179.28	C48H84NO9P	[M+Hac-H]-	908.602	-0.15	['PS(O-20:0/22:6(4Z,7Z,10Z,13Z,16Z,19Z))']
910.58	16746.6	C47H82NO10P	[M+Hac-H]-	910.581	-1.16	['PS(19:1(9Z)/22:4(7Z,10Z,13Z,16Z))', 'PS(20:5(5Z,8Z,11Z,14Z,17Z)/21:0)', 'PS(21:0/20:5(5Z,8Z,11Z,14Z,17Z))', 'PS(22:4(7Z,10Z,13Z,16Z)/19:1(9Z))']
918.548	65939.5	C48H78NO10P	[M+Hac-H]-	918.55	-2.43	['PS(20:2(11Z,14Z)/22:6(4Z,7Z,10Z,13Z,16Z,19Z))', 'PS(20:4(5Z,8Z,11Z,14Z)/22:4(7Z,10Z,13Z,16Z))', 'PS(22:4(7Z,10Z,13Z,16Z)/20:4(5Z,8Z,11Z,14Z))', 'PS(22:6(4Z,7Z,10Z,13Z,16Z,19Z)/20:2(11Z,14Z))']
918.616	11612.3	0
919.474	10776	0
919.552	34763.6	C56H82O6S	[M+(37Cl)]-	919.55	2.01	['Sulfated Dihydromenaquinone-9']
919.63	12014.3	C49H93O13P	[M-H]-	919.628	1.77	['PI(18:0/22:1(11Z))', 'PI(18:1(9Z)/22:0)', 'PI(19:1(9Z)/21:0)', 'PI(20:0/20:1(11Z))', 'PI(20:1(11Z)/20:0)', 'PI(21:0/19:1(9Z))', 'PI(22:0/18:1(9Z))', 'PI(22:1(11Z)/18:0)']
920.564	67020.1	C48H80NO10P	[M+Hac-H]-	920.566	-1.73	['PS(20:1(11Z)/22:6(4Z,7Z,10Z,13Z,16Z,19Z))', 'PS(20:3(8Z,11Z,14Z)/22:4(7Z,10Z,13Z,16Z))', 'PS(20:5(5Z,8Z,11Z,14Z,17Z)/22:2(13Z,16Z))', 'PS(22:2(13Z,16Z)/20:5(5Z,8Z,11Z,14Z,17Z))', 'PS(22:4(7Z,10Z,13Z,16Z)/20:3(8Z,11Z,14Z))', 'PS(22:6(4Z,7Z,10Z,13Z,16Z,19Z)/20:1(11Z))']
921.567	33069.1	0
922.58	53279.2	C48H82NO10P	[M+Hac-H]-	922.581	-1.96	['PS(20:0/22:6(4Z,7Z,10Z,13Z,16Z,19Z))', 'PS(20:2(11Z,14Z)/22:4(7Z,10Z,13Z,16Z))', 'PS(20:4(5Z,8Z,11Z,14Z)/22:2(13Z,16Z))', 'PS(20:5(5Z,8Z,11Z,14Z,17Z)/22:1(11Z))', 'PS(22:1(11Z)/20:5(5Z,8Z,11Z,14Z,17Z))', 'PS(22:2(13Z,16Z)/20:4(5Z,8Z,11Z,14Z))', 'PS(22:4(7Z,10Z,13Z,16Z)/20:2(11Z,14Z))', 'PS(22:6(4Z,7Z,10Z,13Z,16Z,19Z)/20:0)']
923.583	21382.5	0
924.596	13472.4	C48H84NO10P	[M+Hac-H]-	924.597	-1.28	['PS(20:1(11Z)/22:4(7Z,10Z,13Z,16Z))', 'PS(20:3(8Z,11Z,14Z)/22:2(13Z,16Z))', 'PS(20:4(5Z,8Z,11Z,14Z)/22:1(11Z))', 'PS(20:5(5Z,8Z,11Z,14Z,17Z)/22:0)', 'PS(22:0/20:5(5Z,8Z,11Z,14Z,17Z))', 'PS(22:1(11Z)/20:4(5Z,8Z,11Z,14Z))', 'PS(22:2(13Z,16Z)/20:3(8Z,11Z,14Z))', 'PS(22:4(7Z,10Z,13Z,16Z)/20:1(11Z))']
926.515	7292.72	0
926.583	3221.08	0
926.613	16480.1	C48H86NO10P	[M+Hac-H]-	926.613	0.17	['PS(20:0/22:4(7Z,10Z,13Z,16Z))', 'PS(20:2(11Z,14Z)/22:2(13Z,16Z))', 'PS(20:3(8Z,11Z,14Z)/22:1(11Z))', 'PS(20:4(5Z,8Z,11Z,14Z)/22:0)', 'PS(22:0/20:4(5Z,8Z,11Z,14Z))', 'PS(22:1(11Z)/20:3(8Z,11Z,14Z))', 'PS(22:2(13Z,16Z)/20:2(11Z,14Z))', 'PS(22:4(7Z,10Z,13Z,16Z)/20:0)']
926.613	16480.1	C48H91NO13	[M+(37Cl)]-	926.615	-2.75	['NA', 'LacCer(d18:0/18:1)', 'LacCer(d18:1/18:0)']
926.613	16480.1	C48H93NO11S	[M+Cl]-	926.616	-3.66	['C24 Sulfatide']
926.686	6774.14	C50H94NO8P	[M+Hac-H]-	926.686	0.32	['PC(20:1(11Z)/22:2(13Z,16Z))', 'PC(20:2(11Z,14Z)/22:1(11Z))', 'PC(20:3(8Z,11Z,14Z)/22:0)', 'PC(22:0/20:3(8Z,11Z,14Z))', 'PC(22:1(11Z)/20:2(11Z,14Z))', 'PC(22:2(13Z,16Z)/20:1(11Z))']
927.616	9293.75	0
928.531	5592.25	0
929.576	8282.55	C47H83O12P	[M+Hac-H]-	929.576	-0.22	['PI(O-18:0/20:5(5Z,8Z,11Z,14Z,17Z))', 'PI(P-16:0/22:4(7Z,10Z,13Z,16Z))', 'PI(P-18:0/20:4(5Z,8Z,11Z,14Z))', 'PI(P-20:0/18:4(6Z,9Z,12Z,15Z))']
929.769	20484.8	0
930.773	11767.6	0
936.671	3542.88	0
937.456	2944.27	0
938.687	4458.17	C51H94NO8P	[M+Hac-H]-	938.686	1.41	['PC(21:0/22:4(7Z,10Z,13Z,16Z))', 'PC(22:4(7Z,10Z,13Z,16Z)/21:0)']
939.524	10739.5	C47H77O13P	[M+Hac-H]-	939.524	-0.25	['PI(16:1(9Z)/22:6(4Z,7Z,10Z,13Z,16Z,19Z))', 'PI(18:2(9Z,12Z)/20:5(5Z,8Z,11Z,14Z,17Z))', 'PI(18:3(6Z,9Z,12Z)/20:4(5Z,8Z,11Z,14Z))', 'PI(18:3(9Z,12Z,15Z)/20:4(5Z,8Z,11Z,14Z))', 'PI(18:4(6Z,9Z,12Z,15Z)/20:3(8Z,11Z,14Z))', 'PI(20:3(8Z,11Z,14Z)/18:4(6Z,9Z,12Z,15Z))', 'PI(20:4(5Z,8Z,11Z,14Z)/18:3(6Z,9Z,12Z))', 'PI(20:4(5Z,8Z,11Z,14Z)/18:3(9Z,12Z,15Z))', 'PI(20:5(5Z,8Z,11Z,14Z,17Z)/18:2(9Z,12Z))', 'PI(…
940.527	5652.4	0
943.65	29443.8	0
943.786	8201.76	0
944.653	18052.2	0
944.789	4745.2	0
945.643	4166.4	C51H95O13P	[M-H]-	945.644	-1.24	['PI(20:0/22:2(13Z,16Z))', 'PI(20:1(11Z)/22:1(11Z))', 'PI(20:2(11Z,14Z)/22:0)', 'PI(22:0/20:2(11Z,14Z))', 'PI(22:1(11Z)/20:1(11Z))', 'PI(22:2(13Z,16Z)/20:0)']
946.581	11205.6	C50H82NO10P	[M+Hac-H]-	946.581	-0.97	['PS(22:2(13Z,16Z)/22:6(4Z,7Z,10Z,13Z,16Z,19Z))', 'PS(22:4(7Z,10Z,13Z,16Z)/22:4(7Z,10Z,13Z,16Z))', 'PS(22:6(4Z,7Z,10Z,13Z,16Z,19Z)/22:2(13Z,16Z))']
948.561	4469	0
949.599	4685.3	C47H87O13P	[M+Hac-H]-	949.602	-3.06	['PI(16:0/22:2(13Z,16Z))', 'PI(16:1(9Z)/22:1(11Z))', 'PI(17:2(9Z,12Z)/21:0)', 'PI(18:0/20:2(11Z,14Z))', 'PI(18:1(9Z)/20:1(11Z))', 'PI(18:2(9Z,12Z)/20:0)', 'PI(19:1(9Z)/19:1(9Z))', 'PI(20:0/18:2(9Z,12Z))', 'PI(20:1(11Z)/18:1(9Z))', 'PI(20:2(11Z,14Z)/18:0)', 'PI(21:0/17:2(9Z,12Z))', 'PI(22:1(11Z)/16:1(9Z))', 'PI(22:2(13Z,16Z)/16:0)']
950.613	5365.13	C50H86NO10P	[M+Hac-H]-	950.613	0.21	['PS(22:0/22:6(4Z,7Z,10Z,13Z,16Z,19Z))', 'PS(22:2(13Z,16Z)/22:4(7Z,10Z,13Z,16Z))', 'PS(22:4(7Z,10Z,13Z,16Z)/22:2(13Z,16Z))', 'PS(22:6(4Z,7Z,10Z,13Z,16Z,19Z)/22:0)']
950.688	2148.55	C52H94NO8P	[M+Hac-H]-	950.686	2.05	['PC(22:1(11Z)/22:4(7Z,10Z,13Z,16Z))', 'PC(22:4(7Z,10Z,13Z,16Z)/22:1(11Z))']
952.553	5758.73	0
953.619	3594.18	0
954.568	16400.9	0
955.571	10378.1	0
957.802	82504.9	0
958.505	9817.43	0
958.751	6918.91	C52H102NO8P	[M+Hac-H]-	958.748	3.16	['PC(20:0/24:1(15Z))', 'PC(22:0/22:1(11Z))', 'PC(22:0/22:1(13Z))', 'PC(22:1(11Z)/22:0)', 'PC(24:0/20:1(11Z))']
958.806	50179.6	0
959.808	14146.7	C63H108O6	[M-H]-	959.807	0.93	['TG(16:0/22:1(11Z)/22:6(4Z,7Z,10Z,13Z,16Z,19Z))[iso6]', 'TG(16:0/22:1(13Z)/22:6(4Z,7Z,10Z,13Z,16Z,19Z))[iso6]', 'TG(16:0/22:2(13Z,16Z)/22:5(7Z,10Z,13Z,16Z,19Z))[iso6]', 'TG(16:0/22:3(10Z,13Z,16Z)/22:4(7Z,10Z,13Z,16Z))[iso6]', 'TG(16:1(9Z)/22:0/22:6(4Z,7Z,10Z,13Z,16Z,19Z))[iso6]', 'TG(16:1(9Z)/22:1(11Z)/22:5(7Z,10Z,13Z,16Z,19Z))[iso6]', 'TG(16:1(9Z)/22:1(13Z)/22:5(7Z,10Z,13Z,16Z,19Z))[iso6]', 'TG…
964.702	4742.44	C56H99NO9	[M+Cl]-	964.701	0.61	['bacteriohopane-,32,33,34-triol-35-(N-(9-cyclohexyl-nonanoyl))-glucosamine']
965.54	10268.5	C49H79O13P	[M+Hac-H]-	965.54	0.82	['PI(18:2(9Z,12Z)/22:6(4Z,7Z,10Z,13Z,16Z,19Z))', 'PI(18:4(6Z,9Z,12Z,15Z)/22:4(7Z,10Z,13Z,16Z))', 'PI(20:3(8Z,11Z,14Z)/20:5(5Z,8Z,11Z,14Z,17Z))', 'PI(20:4(5Z,8Z,11Z,14Z)/20:4(5Z,8Z,11Z,14Z))', 'PI(20:5(5Z,8Z,11Z,14Z,17Z)/20:3(8Z,11Z,14Z))', 'PI(22:4(7Z,10Z,13Z,16Z)/18:4(6Z,9Z,12Z,15Z))', 'PI(22:6(4Z,7Z,10Z,13Z,16Z,19Z)/18:2(9Z,12Z))']
965.595	10431.2	0
965.704	2645.13	0
971.818	19560.6	0
972.766	6991.6	0
972.822	12272.4	0
974.471	10516.3	0
974.722	14515.1	0
975.475	5120.85	0
975.726	9206.15	0
976.554	14289.4	0
976.739	13432.1	0
977.491	6243.71	0
977.557	7024.35	0
978.504	22817.8	0
978.569	60440.1	0
979.507	13121.1	C52H72O14	[M+Hac-H]-	979.506	0.94	['Astaxanthin diglucoside/ Astaxanthin beta-D-diglucoside']
979.573	29484.3	0
979.703	3325.25	C61H92O6	[M+Hac-H]-	979.703	-0.33	['TG(14:1(9Z)/22:6(4Z,7Z,10Z,13Z,16Z,19Z)/22:6(4Z,7Z,10Z,13Z,16Z,19Z))[iso3]', 'TG(18:3(6Z,9Z,12Z)/18:4(6Z,9Z,12Z,15Z)/22:6(4Z,7Z,10Z,13Z,16Z,19Z))[iso6]', 'TG(18:3(6Z,9Z,12Z)/20:5(5Z,8Z,11Z,14Z,17Z)/20:5(5Z,8Z,11Z,14Z,17Z))[iso3]', 'TG(18:3(9Z,12Z,15Z)/18:4(6Z,9Z,12Z,15Z)/22:6(4Z,7Z,10Z,13Z,16Z,19Z))[iso6]', 'TG(18:3(9Z,12Z,15Z)/20:5(5Z,8Z,11Z,14Z,17Z)/20:5(5Z,8Z,11Z,14Z,17Z))[iso3]', 'TG(18:4(6…
980.489	18305.6	0
980.587	26297.5	0
981.492	8488.18	0
981.524	6656.56	0
981.59	16762.7	0
981.74	2266.52	0
982.505	24035.2	C47H73NO17	[M+Hac-H]-	982.502	3.62	['Amphotericin B']
982.602	24155.3	0
982.751	35239.2	C57H105NO9	[M+Cl]-	982.748	2.74	['Plakoside A']
983.508	11891.3	0
983.604	13534	0
983.755	21895.7	0
983.819	15054.8	0
984.52	37256.5	C47H75NO17	[M+Hac-H]-	984.517	3.05	['Nystatin', 'Nystatin A1']
984.767	33418.1	C54H104NO8P	[M+Hac-H]-	984.764	3.38	['PC(23:1(9Z)/23:1(9Z))']
984.822	9373.75	0
985.523	21306.1	0
985.77	21754	0
985.834	112698	0
986.537	24792.2	0
986.782	110349	C54H106NO8P	[M+Hac-H]-	986.779	2.72	['PC(22:0/24:1(15Z))']
986.837	72287.4	0
987.786	68815.7	0
987.84	21166.2	C65H112O6	[M-H]-	987.839	1.84	['TG(18:0/22:1(11Z)/22:6(4Z,7Z,10Z,13Z,16Z,19Z))[iso6]', 'TG(18:0/22:1(13Z)/22:6(4Z,7Z,10Z,13Z,16Z,19Z))[iso6]', 'TG(18:0/22:2(13Z,16Z)/22:5(7Z,10Z,13Z,16Z,19Z))[iso6]', 'TG(18:0/22:3(10Z,13Z,16Z)/22:4(7Z,10Z,13Z,16Z))[iso6]', 'TG(18:1(9Z)/22:0/22:6(4Z,7Z,10Z,13Z,16Z,19Z))[iso6]', 'TG(18:1(9Z)/22:1(11Z)/22:5(7Z,10Z,13Z,16Z,19Z))[iso6]', 'TG(18:1(9Z)/22:1(13Z)/22:5(7Z,10Z,13Z,16Z,19Z))[iso6]', 'TG…
988.554	14180.7	0
988.703	8692.01	0
988.799	37104.2	0
989.803	24373	0
990.718	30781.3	0
990.806	7489.55	0
991.721	19321.7	0
992.586	8032.5	0
992.734	18201.1	0
993.738	2825.1	0
994.751	12036.6	0
1002.57	16224.7	0
1005.59	15243.1	0
1006.6	17533.4	0
1006.75	16285.2	0
1008.77	59199.5	0
1009.77	37820.8	0
1010.78	220782	0
1011.79	139642	0
1011.85	15736.6	0
1012.7	24537.4	0
1012.8	123265	C56H108NO8P	[M+Hac-H]-	1012.8	3.6	['PC(24:1(15Z)/24:1(15Z))']
1013.8	82222.9	0
1013.87	51146.6	0
1014.72	33267	0
1014.81	151472	0
1014.87	34201.2	0
1015.72	22241.9	0
1015.82	99246.1	0
1016.73	55709.6	0
1017.74	37940.2	0
1017.83	19942.9	0
1018.75	47251.6	0
1019.75	31517.7	0
1020.77	16663.7	0
1021.77	13178.4	0
1026.82	10250	0
1028.83	14262.1	0
1032.77	148502	0
1033.77	98954.1	0
1034.78	187080	0
1035.79	125258	0
1036.8	246472	0
1037.8	164851	0
1038.81	347293	0
1039.82	227582	0
1039.88	23230.4	0
1040.73	37543.8	0
1040.83	168417	0
1040.88	14900.1	0
1041.74	25100.6	C63H98O8	[M+Hac-H]-	1041.74	-2.82	['Thermozeaxanthin-17/ Zeaxanthin glucoside ester']
1041.83	107788	0
1041.9	47197.9	0
1042.75	45730.2	0
1042.85	114031	0
1042.9	32948.4	0
1043.75	31031.1	0
1043.85	75420.5	0
1044.76	66930.2	0
1044.85	23717.3	0
1045.77	45588.9	0
1046.78	41554.3	0
1047.78	28179.4	0
1048.8	17041.5	0
1050.82	14008	0
1058.78	47707	0
1059.79	34576.6	0
1060.57	24540.7	0
1060.8	207203	0
1061.8	141739	0
1062.81	239910	0
1063.82	163707	0
1064.83	245986	C60H112NO8P	[M+Hac-H]-	1064.83	2.93	['PC(20:4(5Z,8Z,11Z,14Z)/32:0)', 'PC(26:2(5E,9Z)/26:2(5E,9Z))', 'PC(26:2(5Z,9E)/26:2(5Z,9E))', 'PC(26:2(5Z,9Z)/26:2(5Z,9Z))', 'PC(26:2(6Z,9Z)/26:2(6Z,9Z))', 'PC(32:0/20:4(5Z,8Z,11Z,14Z))']
1065.83	166389	0
1066.52	12772.5	0
1066.85	156809	0
1067.85	101389	0
1067.91	12893	0
1069.87	34727.3	0
1069.93	17962.5	0
1070.93	14009.5	0
1082.56	18770.4	0
1084.57	17260	0
1086.23	19356.3	0
1086.59	21932.9	0
1087.59	10623.6	0
1087.82	9276.48	0
1088.83	29960.7	0
1089.83	21055.1	0
1090.85	23240.9	0
1092.79	40443.8	0
1093.79	25684.8	0
1094.8	23822.5	0
1095.81	15659.9	0
1096.82	27398.4	0
1097.22	31465	0
1097.73	46092.9	0
1097.82	13009.3	0
1098.23	51868	0
1098.73	71574.5	0
1099.24	54999.1	0
1099.74	68227.2	0
1100.24	42424.5	0
1101.76	30854.4	0
1106.8	11063.4	0
1108.72	21787.4	0
1109.22	30052.3	0
1109.73	53011.5	C57H106N2O16	[M+Cl]-	1109.72	1.74	['NA']
1110.23	50013.1	0
1110.73	67564.7	0
1111.24	58301.2	0
1111.74	61388.5	0
1112.25	48229.8	0
1112.75	49696.1	0
1113.25	29490.3	0
1113.76	34687	0
1115.77	21443.6	0
1116.79	32083.5	0
1117.79	21971.7	0
1118.8	38764.6	0
1119.81	26631.8	0
1120.82	52659.2	0
1121.82	35302.4	0
1124.75	14561.4	0
1126.77	17612.5	0
1127.77	11896.7	0
1128.79	16668.6	0
1142.58	13233.5	0
1142.8	25199.9	0
1144.82	28367.3	0
1145.82	19216.3	0
1146.84	33579.3	0
1147.84	22295.8	0
1161.68	15190.4	0
1162.69	12647.1	0
1198.79	13252.9	0
1202.82	25947.4	0
1203.82	14767.1	0
1255.83	15481.5	0
1257.84	19870.5	0
1325.84	21261.5	0
1439.91	79484.6	0
1440.91	70935.1	0
1441.92	92178.5	0
1450.98	81387.7	0
1451.98	44215.9	0
1452.99	57750.8	0
1462.9	29314.5	0
1470.06	55954	0
1471.06	55072	0
1472.96	55972.1	0
1474.98	73491.7	0
1476.99	96323.6	0
1479.01	38040.9	0
1490.03	69492.6	0
1491.03	63497.4	0
1492.04	132350	0
1493.05	111369	0
1494.06	199928	0
1495.06	163785	0
1496.07	203092	0
1497.08	154847	0
1498.09	149814	0
1499.09	115648	0
1500.1	67190.7	0
1501.11	54946.7	0
1512.01	30140.9	0
1516.04	167538	0
1517.05	144369	0
1518.06	238119	0
1519.06	198174	0
1520.07	260056	0
1521.08	202162	0
1522.09	211861	0
1523.1	161220	0
1524.1	139472	0
1539.03	14226.2	0
1544.08	36916.6	0
1574.14	41971.5	0
1576.16	21173.6	0
1592.1	26265.2	0
1593.1	33959.3	0
1594.11	68992.1	0
1595.12	60025.1	0
1596.13	90477.3	0
1597.13	75049.9	0
1598.14	86739.1	0
1600.16	53046.5	0
1615.81	14584.6	0
1618.11	45175.7	0
1620.13	57431.1	0
1622.14	47019.7	0
1623.15	44549.1	0
1625.17	26184.3	0
1648.81	26428.5	0
1735.25	21701.2	0
1884.78	33033.2	0
a	Average intensity across all samples (n=10).
b	Calculated for the specified ion form of the empirical formula.
c	Error between the observed and theoretical masses, presented as parts per million of the theoretical mass.
