# Supplementary material for: Defining the Baseline and Oxidant Perturbed Lipidomic Profiles of Daphnia magna
Source: Metabolites. 2017 Mar 15;7(1):11. doi: 10.3390/metabo7010011 (PMC5372214; doi:10.3390/metabo7010011)
Supplement: Supplementary file 1 [file metabolites-07-00011-s001.zip › Table S3.xlsx]

## Sheet: S3
Table S3 Putative identification of lipids detected in the mass spectra of D. magna lipid extracts exposed to air in vitro. NA indicates compound is not in the LipidBlast library
Observed		Statistics		Identification
mz	Average intensitya	Fold changeb	p-valuec	Empirical formula	Ion form	Theoretical mass (Da)d	Mass error (ppm)e	Putative ID
73.3822	14173.5	0.122664	4.3e-07
75.021	5885.31	0.212384	1.26e-05
78.3674	13629.1	0.954455	0.82762
80.0418	3320.81	2.15687	0.0139741
94.4759	11223.2	1.20022	0.465882
110.073	5880.64	0.212553	4.28e-07
112.04	12973.6	0.909715	0.731652
134.047	5087.2	0.356727	0.000926992
141.016	11339.5	3.33831	0.0169239
144.962	17779.8	0.93514	0.786842
146.959	10399.2	0.870462	0.599948
154.087	56404.2	0.986883	0.946208
160.957	4040.99	0.309318	7.16e-06
165.058	11951	0.857317	0.69294
166.04	3239.55	0.369978	0.0120098
169.098	16434.5	0.902164	0.618655
173.04	28565	2.04447	0.29133
174.058	46651.2	0.848559	0.629207
174.082	20285.6	1.18633	0.748764
174.085	3635	1.98726	0.00426495
175.072	61291.2	1.25764	0.582993
185.043	7786.81	0.741801	0.429252	C6H12O5	[M+Na-2H]-	185.043	0.09	['Digitoxic acid']
188.951	903840	1.24291	0.301745
188.953	4095.46	1.1552	0.552192
189.088	6153.98	4.01735	0.0223754	C7H14N2O4	[M-H]-	189.088	-0.11	['LL-2,6-Diaminoheptanedioate']
189.955	65569.3	1.24811	0.279187
190.949	580364	1.23493	0.316518
191.952	41895.4	1.24875	0.265434
192.946	87489.7	1.23946	0.299789
193.072	6926.27	1.87052	0.0247346	C5H10O4	[M+Hac-H]-	193.072	-0.28	['2,3-Dihydroxyvaleric acid']
194.043	17760	0.630349	0.229201
196.091	21735	0.738499	0.466946
198.122	11813	4.30196	2.76e-06
202.072	5682.85	2.68707	0.000513809
202.117	4881.25	4.01627	0.000441389
203.104	4149.79	3.43108	0.0227125
205.09	7574.7	0.536427	0.0638162
206.14	19191.5	15.465	0.0104163
207.106	20228.9	0.170065	0.0399284
211.049	12736.6	4.79421	0.19514
211.109	3510.07	0.391481	0.000503747
214.988	44662.7	1.24197	0.712077
215.054	10734.6	2.97822	0.037535
219.099	4442.42	3.66519	0.000147277
220.109	7218.78	0.417428	0.0042572
220.119	38092.7	30.4754	0.00345515
220.145	482761	0.148135	1.03e-06
225.017	121793	0.558588	0.353795	C7H10O6	[M+Cl]-	225.017	-1.38	['2,4-Dihydroxyhept-2-enedioate', '4-Hydroxy-2-oxo-heptanedioate']
229.069	6112.5	4.8902	4.87e-08
235.093	14639.3	1.10957	0.833656
240.059	5098.35	0.280718	0.000305584
257.155	363402	2.56819	0.00123112	C15H18	[M+Hac-H]-	257.155	0.76	['Cadalene', 'Guaiazulene']
257.155	363402	2.56819	0.00123112	C17H22O2	[M-H]-	257.155	0.76	['NA']
258.158	59220.8	3.43525	0.000844721
259.101	178987	0.881367	0.375849
261.117	131761	0.93045	0.600273
267.16	20314.9	16.3637	3.39e-05
275.165	208231	2.35538	0.00123624	C15H20O	[M+Hac-H]-	275.165	0.51	['(+)-Anhydro-beta-rotunol', '10-Hydroxy-isolaurene', 'Furodysin', 'Furodysinin', 'Mutisianthol', 'iso-Debromo-laurinterol']
275.165	208231	2.35538	0.00123624	C17H24O3	[M-H]-	275.165	0.51	['Sugeonyl acetate']
277.178	40565.8	0.325783	0.0781998	C15H28O3	[M+Na-2H]-	277.179	-1.85	['NA', '11-keto pentadecanoic acid', '14-keto pentadecanoic acid', '4-keto pentadecanoic acid']
277.181	2.94526e+06	0.482011	0.0691043	C15H22O	[M+Hac-H]-	277.181	0.58	['NA', '(+)-3,7(11)-Acoradiene', '(+)-4-Isocedren-15-al', '(+)-8-Hydroxycalamenene', '(+)-Arnicenone', '(-)-Solavetivone', '3-Gymnomitren-15-al', '4(15),7(11)-Oppositadien-12-al', 'Kissoones A', 'Pentalen-13-al', 'Valerenal', 'albaflavenone', 'beta-Elemenone']
277.181	2.94526e+06	0.482011	0.0691043	C17H26O3	[M-H]-	277.181	0.58	['NA', 'Panaxytriol']
277.214	20689.6	0.876065	0.62581	C16H32O2	[M+Na-2H]-	277.215	-1.91	['NA', '14:0(10Me,13Me)', '2-hydroxyhexadecanal', 'Hexadecanoic acid', 'Isopalmitic acid', 'Trimethyltridecanoic acid']
277.217	1.81121e+06	0.90851	0.459392	C18H30O2	[M-H]-	277.217	0.64	['NA', '(6Z,9Z,12Z)-Octadecatrienoic acid', '(9Z,11E,13E)-Octadecatrienoic acid', '(9Z,12Z,15Z)-Octadecatrienoic acid', '(R)-lamenallenic acid', '(S)-lamenallenic acid', 'Catalpic acid', 'Columbinic acid', 'Crepenynate', 'Elaidolinoleic acid', 'Gorlic acid', 'Pinolenic acid', 'Pseudoeleostearic acid', 'Punicic acid', 'alpha-calendic acid', 'beta-calendic acid', 'beta-eleostearic acid', 'octadeca-…
277.217	1.81121e+06	0.90851	0.459392	C16H26	[M+Hac-H]-	277.217	0.64	['NA']
278.184	518347	0.488628	0.0617302
278.221	352495	0.8981	0.380217
279.16	20607.9	16.5981	0.000147939
279.197	16823.9	0.152847	0.0012211	C15H24O	[M+Hac-H]-	279.197	0.58	['NA', '(+)-2-Sterpurene-6-ol', '(+)-8-Drimen-7-one', '(+)-Bicyclohumulenone', '(+)-Khusimol', '(+)-delta-Cuprenen-4alpha-ol', '(-)-1(10),11-Eremophiladien-9beta-ol', '(-)-4-Acoren-3-one', '(5R)-albaflavenol', '(5S)-albaflavenol', '14-Hydroxy-modhephene', '1beta,10beta-Epoxy-nardosinane', '2-trans,6-trans-Farnesal', '2E,6Z-farnesal', '3-Copaene-2-ol', '5,10-Epoxy-muurolane', '7(14)-Isodaucen-10-o…
279.197	16823.9	0.152847	0.0012211	C17H28O3	[M-H]-	279.197	0.58	['NA', '12S-HHTrE', 'Methyl (2E,6E)-(10R,11S)-10,11-epoxy-3,7,11-trimethyltrideca-2,6-dienoate']
279.231	15143.5	0.285442	0.00659504
290.178	36823.3	0.348984	0.0865652
293.212	49993.3	2.07411	0.00345529	C18H30O3	[M-H]-	293.212	0.45	['NA', '(9R,13R)-10,11-dihydro-12-oxo-15-phytoenoic acid', '(9R,13R)-10-oxo-11-phytoenoic acid', '(9R,13R)-15,16-dihydro-12-oxo-10-phytoenoic acid', '(9S,13S)-10-oxo-11-phytoenoic acid', '(9S,13S)-15,16-dihydro-12-oxo-10-phytoenoic acid', '12,13S-EpODE', '13(S)-HOT', '13-HOTE', '13-OxoODE', '13S-HOTrE(gamma)', '15(16)-EpODE', '17-hydroxy-linolenic acid', '2(R)-HOT', '2-HoTrE', '8-(5-Hexyl-furan-2…
293.212	49993.3	2.07411	0.00345529	C16H26O	[M+Hac-H]-	293.212	0.45	['NA']
296.172	109656	87.7286	0.00423744
296.231	32598.8	0.922074	0.840297
299.132	123597	0.779002	0.219432
302.221	25138.7	0.408693	0.0505394
304.194	38119.4	0.125572	0.00670678
304.236	27788	0.448255	0.0350096
306.173	98205.2	78.5674	0.0115187
309.244	48579.3	0.799121	0.172142	C17H30O	[M+Hac-H]-	309.244	0.2	['NA']
311.259	55474.4	1.01175	0.930921	C17H32O	[M+Hac-H]-	311.259	0.29	['NA']
311.259	55474.4	1.01175	0.930921	C19H36O3	[M-H]-	311.259	0.29	['NA']
313.275	66783.4	1.10441	0.424495	C17H34O	[M+Hac-H]-	313.275	0.26	['NA']
313.275	66783.4	1.10441	0.424495	C19H38O3	[M-H]-	313.275	0.26	['NA']
320.223	96156.9	0.467884	0.00338053
325.202	31846.9	1.62621	0.115634	C18H30O5	[M-H]-	325.202	-0.03	['2,3-Dinor-8-iso prostaglandin F2alpha', '2,3-dinor-11b-PGF2alpha', '2,3-dinor-PGE1', '2R-HpOTrE', '9K,12,13-diHODE', 'Dinor-PGF2alpha']
325.202	31846.9	1.62621	0.115634	C16H26O3	[M+Hac-H]-	325.202	-0.03	['NA', '(2E,6E)-(10R,11S)-10,11-Epoxy-3,7,11-trimethyltrideca-2,6-dienoic acid', '(9R,13R)-1a,1b-dinor-10,11-dihydro-12-oxo-15-phytoenoic acid', '(9S,13S)-1a,1b-dinor-10,11-dihydro-12-oxo-15-phytoenoic acid', 'Juvenile hormone III', 'Tetranor-12R-HETE']
325.238	46492.5	0.959217	0.888185	C19H34O4	[M-H]-	325.238	0.17	['NA', 'Ceriporic acid A']
325.238	46492.5	0.959217	0.888185	C17H30O2	[M+Hac-H]-	325.238	0.17	['NA']
327.29	16123.4	6.88569	0.000238847	C20H40O3	[M-H]-	327.29	-0.06	['NA', '2-hydroxyphytanic acid', 'L-2-Hydroxyphytanate']
327.29	16123.4	6.88569	0.000238847	C18H36O	[M+Hac-H]-	327.29	-0.06	['NA', 'Octadecanal', 'Oleyl alcohol (NF)', 'octadec-11Z-enol']
333.256	880447	0.956733	0.64541	C19H38O2	[M+Cl]-	333.257	-0.45	['NA', '(+)-16-methyl stearic acid', 'Isopropyl palmitate (NF)', 'Nonadecanoic acid', 'Pristanic acid', 'Tuberculostearic acid']
333.256	880447	0.956733	0.64541	C20H40O	[M+K-2H]-	333.257	-0.27	['NA', 'Phytanal', 'Phytol']
334.204	210468	1.9181	0.300578
334.26	184434	0.91147	0.298708
335.187	82334.5	65.9814	0.00172551	C17H24O3	[M+Hac-H]-	335.186	1.88	['Sugeonyl acetate']
336.183	333595	266.887	0.00136259
339.235	365510	0.716755	0.297345
340.238	64377.7	0.668042	0.341151
340.254	80806.7	0.699895	0.282817
341.197	20243.4	16.3065	0.0013974	C18H30O6	[M-H]-	341.197	0.22	['2,3-Dinor-TXB2', '2,3-dinor, 6-keto-PGF1alpha']
341.233	19708.5	7.16529	6.46e-05	C19H34O5	[M-H]-	341.233	-0.23	['NA', '2,3-Dinor-TXB1']
341.233	19708.5	7.16529	6.46e-05	C17H30O3	[M+Hac-H]-	341.233	-0.23	['NA']
341.25	304316	0.674219	0.215853
341.306	40317.3	2.09914	0.00189524	C19H38O	[M+Hac-H]-	341.306	-0.41	['NA', 'Pristanal']
341.306	40317.3	2.09914	0.00189524	C21H42O3	[M-H]-	341.306	-0.41	['NA']
342.254	54016	0.559702	0.1395
344.269	110790	0.800071	0.460667
345.155	18868.6	7.31363	4.34e-05
346.202	509451	2.61492	0.00113133
347.205	72773.6	3.77097	0.00123304
351.218	47539	1.21263	0.599948	C20H32O5	[M-H]-	351.218	-0.51	['NA', '(13E)-11alpha-Hydroxy-9,15-dioxoprost-13-enoate', '(5Z)-(15S)-11alpha-Hydroxy-9,15-dioxoprostanoate', '10,11-dihydro-Resolvin E1', '11beta-PGE2', '12-D2c-IsoP', '12-D2t-IsoP', '12-epi-12-D2c-IsoP', '12-epi-12-D2t-IsoP', '12-epi-12-iso-LGD2', '12-epi-12-iso-LGE2', '12-iso-LGD2', '12-iso-LGE2', '13,14-dihydro-15-keto-LXA4', '13,14-dihydro-15-keto-PGD2', '15-D2c-IsoP', '15-D2t-IsoP', '15-E2c…
351.218	47539	1.21263	0.599948	C18H28O3	[M+Hac-H]-	351.218	-0.51	['NA', '(9Z,11E,13E)-4-Oxooctadeca-9,11,13-trienoic acid', '12,13S-EOT', '12-OPDA', 'Colnelenic acid']
351.265	54443.8	0.966629	0.93864
353.16	20695.2	16.6679	4.96e-05
353.197	53755.2	0.8577	0.378762	C19H30O6	[M-H]-	353.197	-0.01	['NA']
353.248	36720.1	0.728351	0.210383	C24H34O2	[M-H]-	353.249	-0.97	['NA', 'delta2-THA']
355.176	38461.8	2.87265	0.000157385	C16H24O5	[M+Hac-H]-	355.176	-0.31	['alhpa-tocopheronic acid']
355.322	65969.6	1.37223	0.000162766	C22H44O3	[M-H]-	355.322	-0.25	['(+)-3-hydroxy behenic', '13-Hydroxydocosanoic acid', '2-hydroxy behenic', 'omega-hydroxy behenic']
355.322	65969.6	1.37223	0.000162766	C20H40O	[M+Hac-H]-	355.322	-0.25	['NA', 'Phytanal', 'Phytol']
356.302	60580	0.232012	0.0116228
357.192	32935.4	2.03632	0.0215128	C16H26O5	[M+Hac-H]-	357.192	-0.44	['Tetranor-PGD1', 'Tetranor-PGE1 ']
359.171	27776.6	3.9147	0.000667693	C17H28O8	[M-H]-	359.171	-0.34	['NA']
359.22	165226	0.671745	0.0316204	C20H34O4	[M+Na-2H]-	359.22	-0.16	['NA', '11,12-DHET', '11-deoxy-PGE1', '11-deoxy-PGF2a', '11-deoxy-PGF2beta', '12-Keto-tetrahydro-leukotriene B4', '14,15-DHET', '5,6-DHET', '8,9-DHET', '8R,9S-cis-epoxy-10S-hydroxy-eicosa-11Z,14Z-dienoic acid.']
359.292	21267.7	0.471332	0.134908
360.203	52081.8	1.58862	0.213976
361.133	30263.2	0.1685	3.27e-05
361.296	34620.2	0.719661	0.304458
367.176	21351.6	7.44671	3.17e-05
367.285	76153.6	1.89569	0.468329	C20H36O2	[M+Hac-H]-	367.285	-0.31	['NA', '20:2(5Z,11Z)', '20:2(5Z,13Z)', '20:2(5Z,15Z)', '20:2(5Z,9Z)', '20:2(6,11)', '20:2(7Z,14Z)', 'Sclareol']
368.281	32692.6	1.97533	0.0632875	C19H35NO2	[M+Hac-H]-	368.281	-0.28	['(9Me,4E,8E,10E-d19:3)sphingosine']
369.155	21664.4	17.3322	2.81e-08
369.337	37547.6	1.99443	0.00225333	C21H42O	[M+Hac-H]-	369.337	-0.38	['NA']
369.337	37547.6	1.99443	0.00225333	C23H46O3	[M-H]-	369.337	-0.38	['NA']
370.296	35043.3	0.88432	0.666427	C19H37NO2	[M+Hac-H]-	370.296	-0.36	['(4E,8E,9Me-d19:2)sphingosine']
370.296	35043.3	0.88432	0.666427	C21H41NO4	[M-H]-	370.296	-0.36	['N-stearoyl serine']
370.304	130530	1.33199	0.141831
371.207	37925.5	1.22442	0.341329
373.187	26567	5.64311	8.6e-05
373.223	19445.2	2.06213	0.088105
373.32	138250	0.352151	0.00275749
374.218	40742.4	1.33629	0.438984
374.299	70663.3	3.79579	0.110334
375.32	36819.3	0.148131	0.00152827
379.322	30312.8	1.37941	0.387148	C24H44O3	[M-H]-	379.322	-0.52	['NA']
380.247	52627.9	0.375438	3.96e-05
380.28	27257.1	0.561834	0.125583	C22H39NO4	[M-H]-	380.281	-0.4	['11,12-DiHETrE-EA', '14,15-DiHETrE-EA', '5,6-DiHETrE-EA', '8,9-DiHETrE-EA', 'PGF2alpha dimethyl amide']
380.28	27257.1	0.561834	0.125583	C20H35NO2	[M+Hac-H]-	380.281	-0.4	['Alpha-Linolenoyl ethanolamide', 'Anandamide (18:3, n-6)']
381.265	56563.4	45.2525	1.56e-07	C22H38O5	[M-H]-	381.265	-0.21	['14-F2-dihomo-IsoP', '16,16-dimethyl-PGE1', '16,16-dimethyl-PGF2beta', '17-F2-dihomo-IsoP', '1a,1b-dihomo-PGE1', '1a,1b-dihomo-PGF2alpha', '20-ethyl PGF2alpha', '7-F2-dihomo-IsoP', 'Carboprost methyl (USAN)', 'Unoprostone (INN)']
381.265	56563.4	45.2525	1.56e-07	C20H34O3	[M+Hac-H]-	381.265	-0.21	['NA', '(+)-Villanovane-13alpha,19-diol', '(-)-2,7-Dolabelladiene-6beta,10alpha,18-triol', '(-)-Spongiane-15,16-diol', '12R-HETrE', '15(S)-Hydroxyeicosatrienoic acid', '5S-HETrE', '8S-HETrE']
381.312	35399.4	0.2209	0.00301916
382.296	40397.5	0.905614	0.729116	C20H37NO2	[M+Hac-H]-	382.296	-0.43	['Linoleoyl ethanolamide']
382.296	40397.5	0.905614	0.729116	C22H41NO4	[M-H]-	382.296	-0.43	['N-oleoyl threonine']
384.317	94824.4	1.56998	0.4832
384.356	18337.2	3.55298	0.00283598
385.187	22048.5	5.31037	0.00143183
385.223	30514.1	2.20138	0.0236537	C18H30O5	[M+Hac-H]-	385.223	-0.75	['2,3-Dinor-8-iso prostaglandin F2alpha', '2,3-dinor-11b-PGF2alpha', '2,3-dinor-PGE1', '2R-HpOTrE', '9K,12,13-diHODE', 'Dinor-PGF2alpha']
385.223	30514.1	2.20138	0.0236537	C20H34O7	[M-H]-	385.223	-0.75	['Oleandolide']
385.313	383503	1.65438	0.401353
386.316	86772	1.57917	0.50827
387.202	26138.6	12.7195	3.35e-07	C19H32O8	[M-H]-	387.202	-0.65	['NA']
387.231	87885.8	1.03662	0.950528	C21H36O4	[M+Cl]-	387.231	-0.44	['Ceriporic acid C']
387.231	87885.8	1.03662	0.950528	C22H38O3	[M+K-2H]-	387.231	-0.29	['NA']
387.239	14143.4	6.25642	0.000552347	C18H32O5	[M+Hac-H]-	387.239	-0.72	['NA', '2,3-Dinor-8-iso prostaglandin F1alpha', '9,12,13,TriHODE']
389.182	26782.1	7.51766	0.00139473	C18H30O9	[M-H]-	389.182	-0.46	['(-)-11-hydroxy-9,10-dihydrojasmonic acid 11-beta-D-glucoside']
389.182	26782.1	7.51766	0.00139473	C16H26O7	[M+Hac-H]-	389.182	-0.46	['8-Epiiridodial glucoside', 'Iridodial glucoside', 'Tetranor-PGFM']
389.218	33316.6	15.8803	0.000350543
389.342	41083.4	1.35633	0.297345	C26H46O2	[M-H]-	389.343	-0.57	['NA', '26:3(5Z,9Z,19E)']
391.224	39527.8	0.545495	0.144954
391.233	19664.1	8.3425	0.000946744
392.31	124925	1.08868	0.799272
393.228	250455	3.4249	0.000556782	C20H30O4	[M+Hac-H]-	393.228	-0.42	['NA', '(-)-8,16-Dihydroxy-19-serrulatanoic acid', '(-)-Cassaic acid', '(-)-Leucothol C', '12-J2-IsoP', '12-Keto-leukotriene B4', '12-epi-12-J2-IsoP', '12S-HpEPE', '14,15-dehydro-LTB4', '15-A2c-IsoP', '15-A2t-IsoP', '15-J2-IsoP', '15-Keto-13,14-dihydroprostaglandin A2', '15-deoxy-delta-12,14-PGD2', '15-epi-15-A2c-IsoP', '15-epi-15-A2t-IsoP', '15-epi-15-J2-IsoP', '15R-PGA2', '15S-HpEPE', '18R-HpEP…
394.231	55838.3	4.68609	0.00149912
394.377	43898	1.14997	0.653849
396.098	132385	105.912	0.00268555
396.239	38165.5	0.349336	0.111926
396.247	162073	0.654843	0.319761
397.259	215863	0.594216	0.0287661	C20H34O4	[M+Hac-H]-	397.26	-0.51	['NA', '11,12-DHET', '11-deoxy-PGE1', '11-deoxy-PGF2a', '11-deoxy-PGF2beta', '12-Keto-tetrahydro-leukotriene B4', '14,15-DHET', '5,6-DHET', '8,9-DHET', '8R,9S-cis-epoxy-10S-hydroxy-eicosa-11Z,14Z-dienoic acid.']
397.368	35455	1.64174	0.097183	C23H46O	[M+Hac-H]-	397.369	-0.75	['NA']
397.368	35455	1.64174	0.097183	C25H50O3	[M-H]-	397.369	-0.75	['NA']
398.095	79883.7	64.0207	0.00544466
398.263	48735	0.475032	0.013952
398.291	40738.5	1.44193	0.13226	C20H37NO3	[M+Hac-H]-	398.291	-0.85	['Oleoyl glycine']
400.351	133600	0.574711	0.158201
401.218	26178	2.68663	0.0204111	C18H30O6	[M+Hac-H]-	401.218	-0.78	['2,3-Dinor-TXB2', '2,3-dinor, 6-keto-PGF1alpha']
401.218	26178	2.68663	0.0204111	C20H34O8	[M-H]-	401.218	-0.78	['5S-HETE di-endoperoxide']
401.363	168806	1.03044	0.857737	C22H46O2	[M+Hac-H]-	401.364	-0.76	['1,2-docasanediol', '15-methyl-1,2-heneicosanediol']
402.294	52788.7	0.902953	0.602034
402.327	482738	1.64387	0.361504
402.367	34325.8	0.837929	0.64541
403.323	1.76683e+06	1.65496	0.366165
403.33	93731.7	1.59723	0.446322
403.343	66576.5	1.06312	0.71494
404.327	350685	1.61403	0.378762
405.35	74172.8	2.01876	0.174931	C24H50O2	[M+Cl]-	405.35	-0.72	['1,2-tetracosanediol']
406.208	68547	1.23794	0.487678
409.272	153994	2.1101	0.265189	C25H40O3	[M+Na-2H]-	409.272	-0.38	['(+)-Desoxyscalarin', '1alpha,25-dihydroxy-23,24-dinorvitamin D3 / 1alpha,25-dihydroxy-23,24-dinorcholecalciferol', '1alpha,25-dihydroxy-26,27-dinorvitamin D3 / 1alpha,25-dihydroxy-26,27-dinorcholecalciferol', '1alpha-hydroxy-21-nor-20-oxavitamin D3 / 1alpha-hydroxy-21-nor-20-oxacholecalciferol']
409.272	153994	2.1101	0.265189	C22H44O4	[M+K-2H]-	409.273	-0.75	['NA']
409.368	38186.6	0.516741	0.0119774	C26H50O3	[M-H]-	409.369	-1	['3-oxohexacosanoic acid']
409.368	38186.6	0.516741	0.0119774	C24H46O	[M+Hac-H]-	409.369	-1	['NA']
410.314	229074	0.798639	0.124414
410.327	32036.5	0.960763	0.891708	C22H41NO2	[M+Hac-H]-	410.328	-1.3	['Anandamide (20:2, n-6)']
411.275	917537	0.509328	0.0065133	C21H36O4	[M+Hac-H]-	411.275	-0.67	['Ceriporic acid C']
412.278	212813	0.506959	0.00684366
413.209	65456.6	0.546854	0.13226	C22H34O5	[M+Cl]-	413.21	-1.44	['1,9-dideoxyforskolin', 'C22-PGF4alpha']
413.209	65456.6	0.546854	0.13226	C23H36O4	[M+K-2H]-	413.21	-1.3	['MG(0:0/20:5(5Z,8Z,11Z,14Z,17Z)/0:0)']
413.338	44168.6	2.77463	0.0144303
414.213	55194.3	0.581627	0.0689827
414.294	113245	0.630621	0.0171115
415.233	28199.4	14.1357	2.4e-05	C19H32O6	[M+Hac-H]-	415.234	-1.02	['NA']
415.259	68124.3	0.669683	0.0203915	C27H38O	[M+(37Cl)]-	415.259	0.9	['NA']
415.321	153095	122.481	1.6e-06	C25H40O	[M+Hac-H]-	415.322	-1.3	['(-)-Ceriferol 1', '26,27-bisnor-22-dehydro-cholesterol']
415.321	153095	122.481	1.6e-06	C27H44O3	[M-H]-	415.322	-1.3	['NA', '(22R)-22,25-dihydroxyvitamin D3 / (22R)-22,25-dihydroxycholecalciferol', '(22S)-22,25-dihydroxyvitamin D3 / (22S)-22,25-dihydroxycholecalciferol', '(23R)-23,25-dihydroxyvitamin D3 / (23R)-23,25-dihydroxycholecalciferol', '(23S)-23,25-dihydroxyvitamin D3 / (23S)-23,25-dihydroxycholecalciferol', '(24R)-1alpha,24-dihydroxyvitamin D3 / (24R)-1alpha,24-dihydroxycholecalciferol', '(24R)-24,25-d…
416.325	39958.1	31.9678	1.91e-05
417.239	70026.9	0.439333	0.00570011	C19H41O6P	[M+Na-2H]-	417.239	0.58	['PA(O-16:0/0:0)']
417.373	159572	1.07129	0.653658	C28H50O2	[M-H]-	417.374	-0.9	['15-ketocholestane', '24:3(5Z,9Z,17Z)(11Me,15Me,19Me,23Me)', '28:3(5Z,9Z,21Z)', '3-epi-6-deoxocathasterone', '6-Deoxocathasterone', '6alpha-hydroxycampestanol']
418.377	44309.8	1.02293	0.929195
419.293	251134	0.725017	0.200877	C27H42O2	[M+Na-2H]-	419.293	-0.69	['NA', '(22E)-1alpha-hydroxy-22,23-didehydrovitamin D3 / (22E)-1alpha-hydroxy-22,23-didehydrocholecalciferol', '(22E)-1beta-hydroxy-22,23-didehydrovitamin D3 / (22E)-1beta-hydroxy-22,23-didehydrocholecalciferol', '(22Z)-1alpha-hydroxy-22,23-didehydrovitamin D3 / (22Z)-1alpha-hydroxy-22,23-didehydrocholecalciferol', '(22Z)-1beta-hydroxy-22,23-didehydrovitamin D3 / (22Z)-1beta-hydroxy-22,23-didehyd…
419.293	251134	0.725017	0.200877	C24H46O3	[M+K-2H]-	419.293	-1.05	['NA', 'Hydroxynervonic acid']
419.293	251134	0.725017	0.200877	C23H44O4	[M+Cl]-	419.293	-1.2	['Tricosanedioic acid']
419.337	97593	0.855436	0.831332
419.389	42347	0.844919	0.607386	C28H52O2	[M-H]-	419.389	-1.01	['24:2(5Z,9Z)(11Me,15Me,19Me,23Me)', '27:2(5Z,9Z)(25Me)', '27:2(5Z,9Z)(26Me)', '28:2(5Z,9Z)', '28:2(9Z,21Z)', 'Myristoleyl myristoleate']
420.296	74474.7	0.703835	0.206972
422.408	70169.1	2.22283	0.00128285
427.38	15011.6	0.0825024	6.46e-05	C24H48O2	[M+Hac-H]-	427.379	0.58	['NA', '4-Methyl-3-heptyl palmitate ', 'Lauryl laurate', 'Mycocerosic acid (C24)', 'Mycosanoic acid (C24)', 'Tetracosanoic acid']
429.395	39071.3	0.0318782	0.000468209	C24H50O2	[M+Hac-H]-	429.395	0.57	['1,2-tetracosanediol']
433.235	407927	0.0030631	0.000461594
433.317	52305	0.023834	0.00108852
433.332	49842.5	39.8756	5.57e-07	C27H46O4	[M-H]-	433.332	-1.3	['NA', '(10R)-1alpha,19,25-trihydroxy-10,19-dihydrovitamin D3 / (10R)-1alpha,19,25-trihydroxy-10,19-dihydrocholecalciferol', '(10S)-1alpha,19,25-trihydroxy-10,19-dihydrovitamin D3 / (10S)-1alpha,19,25-trihydroxy-10,19-dihydrocholecalciferol', '(25R)-3alpha,7alpha,12alpha-trihydroxy-5beta-cholestan-26-al', '(25R)-3alpha,7alpha-dihydroxy-5beta-cholestan-26-oic acid', '1alpha,25-dihydroxy-2alpha-hyd…
433.332	49842.5	39.8756	5.57e-07	C25H42O2	[M+Hac-H]-	433.332	-1.3	['NA', 'Dolichoic acid-[18-20]']
435.242	62688.9	50.1532	2.68e-05
435.243	57090.9	0.0218409	0.000399909
435.25	2.17071e+06	0.000575789	0.00149354
436.254	576364	0.00216816	0.000855004
437.252	25587.1	0.36108	0.10569
437.257	49893.8	0.0249827	0.00134478
441.286	27667.2	0.045178	0.000149493	C22H38O5	[M+Hac-H]-	441.286	0.21	['14-F2-dihomo-IsoP', '16,16-dimethyl-PGE1', '16,16-dimethyl-PGF2beta', '17-F2-dihomo-IsoP', '1a,1b-dihomo-PGE1', '1a,1b-dihomo-PGF2alpha', '20-ethyl PGF2alpha', '7-F2-dihomo-IsoP', 'Carboprost methyl (USAN)', 'Unoprostone (INN)']
445.369	35775.3	0.0348037	0.000122878	C27H46O	[M+Hac-H]-	445.369	-0.06	['NA', '15-dehydro-A-norcholestanol', '3beta-Hydroxycholest-4-ene', '5alpha-Cholest-8-en-3beta-ol', '5alpha-Cholestan-3-one', '5beta-Cholestan-3-one', 'Cholesterol', 'Lathosterol', 'Patinosterol', 'dihydrotachysterol3 / (5E)-(10S)-10,19-dihydrovitamin D3 / (5E)-(10S)-10,19-dihydrocholecalciferol', 'toxisterol3 R1 / 6,19-dihydrovitamin D3 / 6,19-dihydrocholecalciferol']
445.369	35775.3	0.0348037	0.000122878	C29H50O3	[M-H]-	445.369	-0.06	['NA', '24-hydroperoxy-24-vinylcholesterol', 'Nebrosteroid M']
445.39	14409.8	0.0859147	0.00137899
446.385	34708.5	0.296606	0.000945712
447.315	49654	0.0251732	6.02e-10
447.369	31174.1	0.880669	0.720864
447.421	34847.1	0.630411	0.121188	C30H56O2	[M-H]-	447.421	-0.19	['26:2(5Z,9Z)(13Me,17Me,21Me,25Me)', '29:2(5Z,9Z)(22Me)', '29:2(5Z,9Z)(26Me)', '30:2(9Z,23Z)', 'Lauryl linoleate', 'Linoleyl laurate', 'Myristolel palmitoleate', 'Palmitoleyl myristoleate']
449.304	478628	0.677272	0.151265	C28H44O3	[M+Na-2H]-	449.304	-0.14	['NA', '(22E)-(25R)-1alpha,25-dihydroxy-26-methyl-22,23-didehydrovitamin D3 / (22E)-(25R)-1alpha,25-dihydroxy-26-methyl-22,23-didehydrocholecalciferol', '(22E)-(25S)-1alpha,25-dihydroxy-26-methyl-22,23-didehydrovitamin D3 / (22E)-(25S)-1alpha,25-dihydroxy-26-methyl-22,23-didehydrocholecalciferol', '(22E)-1alpha,25-dihydroxy-22,23-didehydro-24a-homovitamin D3 / (22E)-1alpha,25-dihydroxy-22,23-dide…
449.304	478628	0.677272	0.151265	C23H47O6P	[M-H]-	449.304	-0.23	['PA(P-20:0/0:0)']
449.312	48236.4	0.0258386	0.00125983
449.331	42086.2	0.029602	2.8e-05
450.307	55689	0.0223893	0.000178541
451.245	177080	0.380519	0.397418
452.278	20386	0.2144	0.00260535	C19H40NO5P	[M+Hac-H]-	452.278	-0.08	['C19 Sphingosine-1-phosphate']
452.278	20386	0.2144	0.00260535	C21H44NO7P	[M-H]-	452.278	-0.08	['LysoPE(16:0/0:0)', 'PC(13:0/0:0)']
457.426	223148	0.890175	0.523491
458.235	47195.2	0.339203	0.025223
458.327	42018.9	7.17795	0.00257036
458.429	67052.3	0.915535	0.655244
459.405	165852	0.927502	0.628134
460.409	48147	0.975272	0.887196
461.348	261301	0.862015	0.566269	C25H50O7	[M-H]-	461.348	-0.21	['NA']
462.352	68706	0.834208	0.540043
462.38	184117	147.299	0.0028017
463.283	96715.7	0.554271	0.365058	C28H42O4	[M+Na-2H]-	463.283	-0.06	['(22S)-1alpha,22,25-trihydroxy-23,24-tetradehydro-24a-homo-20-epivitamin D3 / (22S)-1alpha,22,25-trihydroxy-23,24-tetradehydro-24a-homo-20-epicholecalciferol', '1alpha-hydroxy-18-(4-hydroxy-4-methyl-2-pentynyloxy)-23,24,25,26,27-pentanorvitamin D3 / 1alpha-hydroxy-18-(4-hydroxy-4-methyl-2-pentynyloxy)-23,24,25,26,27-pentanorcholecalciferol']
463.283	96715.7	0.554271	0.365058	C23H45O7P	[M-H]-	463.283	-0.14	['PA(20:1(11Z)/0:0)']
467.24	121994	0.80831	0.654912
467.338	16891.8	7.72966	0.00128352	C27H48O6	[M-H]-	467.338	-0.5	['NA', '5alpha-Dermophol', '5beta-Dermophol', 'Arapaimol-B', 'Herbasterol', 'Scymnol']
471.227	442650	1.38639	0.611376
471.405	72565.6	0.676484	0.0106617	C26H52O3	[M+Hac-H]-	471.405	-0.34	['NA', '(S)-3-hydroxyhexacosanoic acid', 'Mycolipanolic acid (C26)']
472.23	109219	1.36211	0.635574
473.421	222111	0.772838	0.110334
473.436	85768.8	1.18174	0.235284	C32H58O2	[M-H]-	473.436	-0.45	['Linolenyl myristate', 'Myristoleyl linoleate', 'Myristyl linolenate']
473.436	85768.8	1.18174	0.235284	C30H54	[M+Hac-H]-	473.436	-0.45	['Tetrahydrosqualene', 'lanostane']
474.262	215248	0.359753	0.000138742	C23H42NO7P	[M-H]-	474.263	-0.31	['LysoPE(18:3(6Z,9Z,12Z)/0:0)', 'LysoPE(18:3(9Z,12Z,15Z)/0:0)']
474.416	34735.3	0.308846	0.000667492
474.424	65031.6	0.753524	0.058284
475.245	95685.8	1.55381	0.138468
475.266	55083.5	0.355842	0.000285948
475.346	72749.9	0.0171814	3.06e-10
475.452	24952.5	0.319898	0.0058769	C32H60O2	[M-H]-	475.452	-0.2	['Linoleyl myristate', 'Myristoleyl oleate', 'Myristyl linoleate', 'Oleyl myristoleate', 'Palmitoleyl palmitoleate']
476.278	132275	0.350679	0.000114441	C28H41NO4	[M+Na-2H]-	476.278	-0.2	['15-HETE-DA', '15-HETE-VA']
476.278	132275	0.350679	0.000114441	C23H44NO7P	[M-H]-	476.278	-0.28	['LysoPE(18:2(9Z,12Z)/0:0)']
476.35	18789.4	0.0660361	3.96e-05
476.386	32030.5	0.119113	0.00203789
477.26	165160	0.728626	0.379838
477.363	35715.2	4.61221	0.00154043
478.264	23901.2	0.163869	0.00469256
478.294	151908	0.436064	0.000690061	C23H46NO7P	[M-H]-	478.294	-0.26	['LysoPE(18:1(9Z)/0:0)', 'PC(15:1(9Z)/0:0)']
478.361	34862.7	16.2027	8.03e-08
479.297	29592.4	0.195063	0.000563568
480.309	59958.5	0.780161	0.258642	C23H48NO7P	[M-H]-	480.31	-0.37	['LysoPC(15:0)', 'LysoPE(18:0/0:0)', 'PC(14:0/O-1:0)', 'PC(7:0/O-8:0)']
481.28	41482	0.79042	0.235284	C24H38O6	[M+Hac-H]-	481.281	-0.61	['NA']
483.235	112554	0.994955	0.979233
485.221	107253	0.99258	0.968798
485.231	66843.4	0.623338	0.297345	C29H36O5	[M+Na-2H]-	485.231	-0.23	['(-)-Jolkinol B']
485.28	1.25244e+06	1.51694	0.505851	C23H47O6P	[M+Cl]-	485.28	-0.37	['PA(P-20:0/0:0)']
486.284	299139	1.52119	0.500941	C26H43NO6	[M+Na-2H]-	486.284	-0.26	['3a,7b,12a-Trihydroxyoxocholanyl-Glycine', 'Glycocholate']
487.277	395995	1.52348	0.504072	C23H47O6P	[M+(37Cl)]-	487.277	-0.16	['PA(P-20:0/0:0)']
487.416	52751.2	0.57207	0.397418	C30H52O	[M+Hac-H]-	487.416	-0.3	['NA', '24,25-Dihydrolanosterol', '24-Isopropyl-cholesterol', '24-ethyl-24-methyl-cholesterol', 'A-norgorgostanol', 'Dinosterol', 'Diplopterol', 'Peridinosterol', 'Tetrahymanol', 'cycloartanol']
487.437	96328.5	0.88216	0.582993
488.281	92947.6	1.58308	0.480468
488.395	54583.8	43.6688	0.000179287
489.343	18629.7	7.93977	0.00125983
490.411	148427	118.746	0.00272151
491.276	32809.9	0.441345	0.0400776	C22H47O8P	[M+Na-2H]-	491.276	1.05	['PG(O-16:0/0:0)']
491.411	17734.4	0.0699337	2.35e-05	C29H52O2	[M+Hac-H]-	491.411	0.16	['29:3(5Z,9Z,23Z)']
493.462	44300.3	1.17535	0.375849
495.302	43077.8	0.533168	0.139207
495.309	2.33164e+06	0.729876	0.446801	C29H46O5	[M+Na-2H]-	495.309	-0.31	['NA', '18-acetoxy-1alpha,25-dihydroxyvitamin D3 / 18-acetoxy-1alpha,25-dihydroxycholecalciferol']
495.309	2.33164e+06	0.729876	0.446801	C24H49O8P	[M-H]-	495.309	-0.39	['PG(P-18:0/0:0)']
496.305	118227	0.674736	0.310688	C24H47NO7	[M+Cl]-	496.305	0.31	['Glucosyl sphingosine', 'Psychosine']
496.305	118227	0.674736	0.310688	C21H44NO6P	[M+Hac-H]-	496.304	0.66	['PE(P-16:0e/0:0)']
496.312	588598	0.728749	0.442451
497.316	56042.9	0.860695	0.726689
498.213	106276	0.771095	0.484675
498.246	57592.8	0.665794	0.42235
499.306	28129.8	22.6158	0.000236317	C30H44O6	[M-H]-	499.307	-0.71	['Hippuristanolide']
499.437	36394.2	0.784466	0.175732	C28H56O3	[M+Hac-H]-	499.437	-0.42	['NA', 'Mycolipanolic acid (C28)']
501.242	110880	0.0112589	0.00257039	C29H38O5	[M+Cl]-	501.241	1.68	['Minabeolide-2']
501.416	74199.3	0.983881	0.927552
501.431	23731.2	4.80927	0.00289756	C31H54O	[M+Hac-H]-	501.431	-0.76	['Tetrahymanol']
501.452	48017.1	0.729477	0.144884
502.294	24335	0.257743	0.00598289	C25H46NO7P	[M-H]-	502.294	-0.31	['LysoPE(20:3(8Z,11Z,14Z)/0:0)']
503.213	34597.2	0.372895	0.0203187	C21H32O10	[M+Hac-H]-	503.213	0.11	['dihydrophaseic acid 4-O-beta-D-glucoside']
503.237	83162.6	0.37115	0.101181
503.251	65057.6	0.869641	0.72056	C26H43O5P	[M+(37Cl)]-	503.251	-1.28	['1alpha-hydroxy-24-(dimethoxyphosphoryl)-25,26,27-trinorvitamin D3 / 1alpha-hydroxy-24-(dimethoxyphosphoryl)-25,26,27-trinorcholecalciferol']
503.378	15727.7	0.129197	0.000273434
503.395	69705.2	1.40501	0.00593254
503.432	70044.5	1.4745	0.232155
504.417	33054.6	0.100509	0.000147939
505.255	65423.9	1.663	0.0276136	C22H45O9P	[M+Na-2H]-	505.255	0.59	['PG(16:0/0:0)']
507.271	94812.5	0.55603	0.204214
507.369	36432.8	3.73435	0.000114583	C28H48O4	[M+Hac-H]-	507.369	-0.32	['Chlorogenin', 'Teasterone', 'Typhasterol']
507.369	36432.8	3.73435	0.000114583	C30H52O6	[M-H]-	507.369	-0.32	['NA']
507.442	34703.3	1.17015	0.408587	C30H56O2	[M+Hac-H]-	507.442	-0.56	['26:2(5Z,9Z)(13Me,17Me,21Me,25Me)', '29:2(5Z,9Z)(22Me)', '29:2(5Z,9Z)(26Me)', '30:2(9Z,23Z)', 'Lauryl linoleate', 'Linoleyl laurate', 'Myristolel palmitoleate', 'Palmitoleyl myristoleate']
507.489	47302	0.5931	0.0788926
508.424	32632.2	0.524606	0.094535
508.473	124790	0.878216	0.542305	C32H63NO3	[M-H]-	508.474	-0.45	['N-(Tetradecanoyl)-sphing-4-enine']
509.314	55223.1	0.720841	0.241688
509.317	84396.6	0.615065	0.184211
509.325	6.15548e+06	0.597547	0.142675	C30H48O5	[M+Na-2H]-	509.325	-0.48	['NA', 'bayogenin', 'cimigenol']
509.325	6.15548e+06	0.597547	0.142675	C23H47O6P	[M+Hac-H]-	509.325	-0.55	['PA(P-20:0/0:0)']
509.333	32995.6	0.851481	0.729116
509.457	84617.6	1.12765	0.495039	C30H58O2	[M+Hac-H]-	509.458	-0.56	['26:1(5Z)(13Me,17Me,21Me,25Me)', '30:1(23Z))', 'Lauryl oleate', 'Lumepueic acid', 'Myristoleyl palmitate', 'Myristyl palmitoleate', 'Oleyl laurate', 'Palmitoleyl myristate', 'Palmityl myristoleate']
510.328	1.60196e+06	0.598822	0.146343
511.332	150850	0.592282	0.143931
511.473	610997	1.20112	0.629207	C30H60O2	[M+Hac-H]-	511.473	-0.42	['NA', 'Lauryl stearate', 'Melissic acid', 'Mycocerosic acid (C30)', 'Myristyl palmitate', 'Palmityl myristate', 'Stearyl laurate']
512.299	511766	0.801565	0.636937	C21H44NO7P	[M+Hac-H]-	512.299	-0.34	['LysoPE(16:0/0:0)', 'PC(13:0/0:0)']
512.972	29491.1	1.00002	0.999936
513.275	126901	0.466001	0.306856
513.302	118736	0.803955	0.651089
513.452	34294.1	0.831189	0.466946
513.469	194856	0.419608	0.19949
514.448	85281.7	1.25136	0.29133
515.258	33984.7	0.50043	0.297501
515.414	438955	1.22058	0.0986908
516.417	136214	1.22177	0.139207
517.253	210524	0.388578	0.0392829
517.411	94833.4	1.28037	0.0067479
518.256	51881.7	0.291425	0.023151
518.414	18177.3	1.82444	0.07324
519.405	55064.5	0.964523	0.854384	C30H52O3	[M+Hac-H]-	519.405	-0.44	['(+)-24-Dammarene-3alpha,12beta,20S-triol', 'Myrrhanol A', 'Protopanaxadiol', 'Taraxastane-3beta,16beta,20beta-triol']
519.442	26649.7	0.853471	0.610232
521.385	52050.5	1.29298	0.292832	C29H50O4	[M+Hac-H]-	521.385	-0.51	['2alpha-(3-Hydroxypropyl)-1alpha,25-dihydroxy-19-norvitamin D3']
523.001	46884.7	0.783472	0.524831
523.364	33067.9	6.89682	9.55e-05	C28H48O5	[M+Hac-H]-	523.364	-0.4	['NA', '7-oxotyphasterol', 'Castasterone', 'Hongguanggenin', 'Trihydroxycoprostanoic acid']
523.473	27875	0.96008	0.891708	C31H60O2	[M+Hac-H]-	523.473	-0.39	['Hentriacontane-14,16-dione', 'Pentadecyl palmitoleate']
525.281	120067	1.89175	0.210383
525.379	16729.2	13.3839	4.84e-07	C28H50O5	[M+Hac-H]-	525.38	-0.42	['6alpha-Hydroxycastasterone']
525.489	70704.3	1.18859	0.594397	C31H62O2	[M+Hac-H]-	525.489	-0.27	['NA', 'D-Mycoceranic acid', 'Mycocerosic acid (C31)', 'Phthioceranic acid (C31)']
526.988	72248.5	1.07647	0.824202
527.435	14709.9	1.43428	0.343705
527.439	25244.2	1.61923	0.235284
527.447	1.95067e+06	1.41397	0.316567	C35H60O3	[M-H]-	527.447	-0.51	['32,35-anhydrobacteriohopaneterol']
528.45	715224	1.40867	0.314846
529.274	112958	0.604045	0.212796	C31H42O5	[M+Cl]-	529.273	1.74	['Norselic acid E']
529.454	93518.8	3.45791	0.0342354
529.462	834308	0.708247	0.361504	C35H62O3	[M-H]-	529.463	-0.51	['30-(-2-(O-2-hydroxy-ethane)-3-hydroxy-propane)-hopane']
530.466	310515	0.704079	0.358582
530.999	46549.3	0.499085	0.027564
531.409	55534.9	1.06765	0.634104
531.426	137757	1.23021	0.289969
532.43	37902.1	1.19273	0.490324
535.266	58971.7	0.807026	0.543842
535.473	69928.7	1.1928	0.29777	C32H60O2	[M+Hac-H]-	535.473	-0.42	['Linoleyl myristate', 'Myristoleyl oleate', 'Myristyl linoleate', 'Oleyl myristoleate', 'Palmitoleyl palmitoleate']
535.521	190450	0.704473	0.155495
536.505	285557	0.89141	0.652704	C34H67NO3	[M-H]-	536.505	-0.28	['Ceramide (d18:1/16:0)']
536.524	66453.3	0.686045	0.184494
537.016	175570	0.734392	0.193338
537.379	12982.9	10.4978	0.000214864	C29H50O5	[M+Hac-H]-	537.38	-0.46	['1alpha,25-dihydroxy-2alpha-(3-hydroxypropoxy)-19-norvitamin D3 / 1alpha,25-dihydroxy-2alpha-(3-hydroxypropoxy)-19-norcholecalciferol', '1alpha,25-dihydroxy-2beta-(3-hydroxypropoxy)-19-norvitamin D3 / 1alpha,25-dihydroxy-2beta-(3-hydroxypropoxy)-19-norcholecalciferol']
537.489	102085	1.21987	0.279187	C32H62O2	[M+Hac-H]-	537.489	-0.4	['NA', 'Myristoleyl stearate', 'Myristyl oleate', 'Oleyl myristate', 'Palmitoleyl palmitate', 'Palmityl palmitoleate', 'Stearyl myristoleate']
537.508	98702.6	0.900035	0.671131
538.492	29761.1	1.53078	0.203126
538.52	85479.9	0.726238	0.235284	C34H69NO3	[M-H]-	538.52	-0.53	['Cer(d18:0/16:0)']
539.235	41613.1	0.484308	0.00239616
539.327	49839.3	1.87999	0.175732
539.335	3.70454e+06	2.12757	0.142675	C24H49O7P	[M+Hac-H]-	539.335	-0.51	['PA(21:0/0:0)']
539.335	3.70454e+06	2.12757	0.142675	C26H53O9P	[M-H]-	539.335	-0.51	['PG(20:0/0:0)']
539.344	26825.6	3.02686	0.112542
539.414	52614.6	0.936668	0.654276
539.504	346222	1.21399	0.523151	C32H64O2	[M+Hac-H]-	539.504	-0.41	['NA', '1-Hexadecyl hexadecanoate', 'Arachidyl laurate', 'Lacceroic acid', 'Lauryl arachidate', 'Mycocerosic acid (C32)', 'Myristyl stearate', 'Stearyl myristate']
540.339	994163	2.13562	0.143904
540.508	105537	1.29981	0.293712
541.342	105322	2.21255	0.154555
541.43	63295.4	1.12519	0.447443
543.296	52190.2	1.01714	0.969132
543.445	1.06434e+06	1.1884	0.292832
544.449	359402	1.20769	0.238282
545.015	135003	0.620755	0.163798
545.442	72590.8	1.1854	0.343483
545.452	52019.5	1.20046	0.283481
546.325	505312	2.0016	0.323149
547.321	2.15832e+06	1.9819	0.3269
548.324	600846	1.97902	0.33596
549.198	32772.4	0.855149	0.69294	C25H30O10	[M+Hac-H]-	549.198	-0.06	['NA']
550.52	62416.2	0.866362	0.553478	C35H69NO3	[M-H]-	550.52	-0.41	['Cer(d18:1/17:0)']
551.032	308484	0.735953	0.279792
552.036	40539.8	0.692079	0.319761
552.5	47482.9	0.798146	0.465882
554.515	26894.5	0.387374	0.0437719	C34H69NO4	[M-H]-	554.515	-0.47	['Cer(t18:0/16:0)']
555.409	63814.2	1.03602	0.802618
557.424	39971.4	0.859807	0.29133
559.44	142841	1.12603	0.313808
560.443	47205.5	1.069	0.614678
563.552	45558.6	0.745685	0.220919
564.344	1.49714e+06	0.56912	0.30827
565.347	505115	0.567824	0.308331
566.351	70440.2	0.489869	0.278406
569.461	108490	1.21449	0.265434
569.532	134261	0.699598	0.414452
571.34	89115.6	1.2511	0.487678	C30H53O8P	[M-H]-	571.341	-0.46	['dolichyl-4-D-xylosyl phosphate']
571.404	197486	0.934744	0.610563
571.458	46235.7	0.967744	0.799174	C31H60O5	[M+Hac-H]-	571.458	-0.23	['1,2-Dimyristyl-sn-glycerol', 'DG(12:0/16:0/0:0)[iso2]']
571.476	159153	1.11131	0.509393
572.344	33342.3	1.72233	0.151265
572.407	71646.4	0.916226	0.483075	C29H62NO6P	[M+Na-2H]-	572.406	1.46	['PC(O-20:0/O-1:0)']
572.481	73006.8	11.3422	0.00556387	C34H67NO3	[M+Cl]-	572.481	-0.85	['Ceramide (d18:1/16:0)']
573.42	42066.3	7.53649	0.000659687
573.473	60810.9	0.763562	0.248742
575.435	214997	0.910352	0.480059
575.453	73180.1	1.0576	0.726689	C32H64O8	[M-H]-	575.453	-0.48	['NA']
576.331	231478	0.481035	0.0125857	C26H48NO7P	[M+Hac-H]-	576.331	-0.34	['LysoPC(18:3(6Z,9Z,12Z))', 'LysoPC(18:3(9Z,12Z,15Z))']
576.331	231478	0.481035	0.0125857	C28H52NO9P	[M-H]-	576.331	-0.34	['PS(22:2(13Z,16Z)/0:0)']
576.438	73452.9	0.8846	0.415668
577.216	298489	0.571153	0.229649
577.357	117881	13.2741	8.51e-05
580.289	35735.1	28.5892	0.00438966	C24H44NO9P	[M+Hac-H]-	580.289	-0.23	['PS(18:2(9Z,12Z)/0:0)']
580.362	69731.1	0.693994	0.0452568	C26H52NO7P	[M+Hac-H]-	580.362	-0.6	['LysoPC(18:1(9Z))', 'PC(0:0/18:1(6Z))', 'PC(0:0/18:1(9E))', 'PC(0:0/18:1(9Z))', 'PC(18:1(6Z)/0:0)', 'PC(18:1(9E)/0:0)', 'PC(18:1(9Z)/0:0)[rac]', 'PC(O-16:1(11Z)/2:0)', 'PC(P-16:0/2:0)']
580.362	69731.1	0.693994	0.0452568	C28H56NO9P	[M-H]-	580.362	-0.6	['PS(22:0/0:0)']
580.4	24437.5	0.0511488	2.14e-06
581.043	126203	1.49521	0.403196
581.342	82784.2	0.591538	0.171549	C33H52O6	[M+(37Cl)]-	581.343	-1.21	['11alpha-Hemiglutaryloxy-1,25-dihydroxyvitamin D3']
581.526	118734	0.689926	0.0865951
582.51	174066	0.910287	0.653078	C33H65NO3	[M+Hac-H]-	582.51	-0.37	['Cer(d16:1/17:0)']
582.529	42948.8	0.607092	0.0807957
583.245	163501	0.544017	0.175509
583.36	61905.4	0.691877	0.0496577	C33H54O6	[M+(37Cl)]-	583.358	1.92	['NA']
583.44	126250	1.01078	0.942121
583.513	68373.1	0.902567	0.634104
584.443	46407.3	0.956543	0.731652
584.526	50649.7	0.715989	0.10849	C33H67NO3	[M+Hac-H]-	584.526	-0.47	['Cer(d18:0/15:0)']
585.343	131605	0.378024	0.130924
585.456	17792.7	6.77589	1.17e-05
585.473	79042.2	0.892341	0.449392	C32H62O5	[M+Hac-H]-	585.474	-0.53	['DG(12:0/17:0/0:0)[iso2]', 'DG(13:0/16:0/0:0)[iso2]']
587.471	78797.1	1.02823	0.857373
588.467	55541.1	3.00086	0.00940143
589.349	66475.1	0.574055	0.150502	C28H57O9P	[M+Na-2H]-	589.349	0.76	['PG(22:0/0:0)']
592.567	42678.1	0.913738	0.747541	C38H75NO3	[M-H]-	592.567	-0.37	['Cer(d16:1/22:0)', 'Ceramide (d18:1/20:0)']
595.542	64023.6	0.474023	0.0778017
599.436	139607	0.918295	0.607386
604.462	60346.8	1.41767	0.279371
609.558	71004.2	0.803978	0.531228	C40H76O2	[M+Na-2H]-	609.559	-1.9	['Behenyl linoleate', 'Linoleyl behenate']
616.462	98528.7	1.25843	0.179484
618.478	308905	1.28243	0.0508857
619.02	108165	0.767528	0.449392
619.481	115190	1.30269	0.00874158
623.574	220154	0.864441	0.620068
624.558	85678.7	0.978744	0.945987	C36H71NO3	[M+Hac-H]-	624.557	0.8	['Cer(d18:0/18:1(9Z))', 'Ceramide (d18:1/18:0)']
624.577	76131.6	0.702959	0.375416
626.537	171535	2.35778	0.0126106
627.019	121336	0.521199	0.0892632
632.457	90948.8	1.37199	0.0187166	C32H63NO5S	[M+Hac-H]-	632.457	0.55	['NA']
632.493	241748	1.18008	0.189708
633.036	321712	0.72221	0.280777
633.497	95269.4	1.23292	0.0936708
634.472	407770	1.14259	0.250213
635.476	147741	1.11998	0.339716
639.263	231951	0.998981	0.997867
641.26	151530	0.926013	0.850573
641.406	697580	0.824728	0.743589	C36H54O6	[M+Hac-H]-	641.406	0.46	['OH-Diaponeurosporene glucoside ester']
642.41	281798	0.795557	0.712506
645.399	104243	1.0191	0.950695
646.509	126947	1.09928	0.413533
647.49	106645	1.20792	0.554422	C37H64O5	[M+Hac-H]-	647.489	0.64	['DG(12:0/22:4(7Z,10Z,13Z,16Z)/0:0)[iso2]', 'DG(14:0/20:4(5Z,8Z,11Z,14Z)/0:0)', 'DG(14:1(9Z)/20:3(8Z,11Z,14Z)/0:0)', 'DG(16:1(9Z)/18:3(9Z,12Z,15Z)/0:0)', 'DG(17:2(9Z,12Z)/17:2(9Z,12Z)/0:0)', 'DG(18:3(6Z,9Z,12Z)/16:1(9Z)/0:0)', 'DG(18:4(6Z,9Z,12Z,15Z)/16:0/0:0)']
647.574	95308.5	0.3224	0.0313595
648.488	252068	1.06534	0.669821
649.505	219412	1.50171	0.112448	C37H66O5	[M+Hac-H]-	649.505	0.43	['DG(12:0/22:3(10Z,13Z,16Z)/0:0)[iso2]', 'DG(14:0/20:3(8Z,11Z,14Z)/0:0)', 'DG(14:1(9Z)/20:2(11Z,14Z)/0:0)', 'DG(16:0/18:3(9Z,12Z,15Z)/0:0)', 'DG(16:1(9Z)/18:2(9Z,12Z)/0:0)', 'DG(17:1(9Z)/17:2(9Z,12Z)/0:0)[iso2]', 'DG(18:3(6Z,9Z,12Z)/16:0/0:0)']
650.509	80918.2	1.77181	0.134526
651.521	87886	1.93786	0.0702122	C37H68O5	[M+Hac-H]-	651.521	0.48	['DG(12:0/22:2(13Z,16Z)/0:0)[iso2]', 'DG(14:0/20:2(11Z,14Z)/0:0)', 'DG(14:1(9Z)/20:1(11Z)/0:0)', 'DG(16:0/18:2(9Z,12Z)/0:0)', 'DG(16:1(9Z)/18:1(9Z)/0:0)', 'DG(17:0/17:2(9Z,12Z)/0:0)[iso2]', 'DG(17:1(9Z)/17:1(9Z)/0:0)']
651.605	148249	0.818631	0.522267
652.589	108942	0.960234	0.891708	C38H75NO3	[M+Hac-H]-	652.589	0.68	['Cer(d16:1/22:0)', 'Ceramide (d18:1/20:0)']
653.584	187905	1.54001	0.282092
655.36	142293	0.513279	0.313808
655.553	93464.2	1.45139	0.0638162	C37H72O5	[M+Hac-H]-	655.552	1.09	['DG(12:0/22:0/0:0)[iso2]', 'DG(13:0/21:0/0:0)[iso2]', 'DG(14:0/20:0/0:0)', 'DG(15:0/19:0/0:0)[iso2]', 'DG(16:0/18:0/0:0)', 'DG(17:0/17:0/0:0)', 'DG(18:0/16:0/0:0)']
662.504	97821.1	0.898726	0.620068
664.42	68977	55.1839	1.18e-05	C33H64NO10P	[M-H]-	664.42	0.48	[' PC(16:0/9:0(COOH))', 'PS(12:0/15:0)', 'PS(13:0/14:0)', 'PS(14:0/13:0)', 'PS(15:0/12:0)']
664.42	68977	55.1839	1.18e-05	C31H60NO8P	[M+Hac-H]-	664.42	0.48	['PE(12:0/14:1(9Z))', 'PE(14:1(9Z)/12:0)']
669.438	771957	0.883765	0.840297
669.568	118861	1.18688	0.402103	C38H74O5	[M+Hac-H]-	669.567	0.67	['DG(13:0/22:0/0:0)[iso2]', 'DG(14:0/21:0/0:0)[iso2]', 'DG(15:0/20:0/0:0)', 'DG(16:0/19:0/0:0)[iso2]', 'DG(17:0/18:0/0:0)[iso2]']
670.441	334895	0.859497	0.812682	C34H68NO7P	[M+(37Cl)]-	670.44	1.5	['PE(P-16:0/13:0)']
671.49	197430	1.26355	0.382751	C39H64O5	[M+Hac-H]-	671.489	0.6	['DG(14:0/22:6(4Z,7Z,10Z,13Z,16Z,19Z)/0:0)', 'DG(14:1(9Z)/22:5(7Z,10Z,13Z,16Z,19Z)/0:0)', 'DG(16:1(9Z)/20:5(5Z,8Z,11Z,14Z,17Z)/0:0)', 'DG(18:3(6Z,9Z,12Z)/18:3(6Z,9Z,12Z)/0:0)', 'DG(18:3(6Z,9Z,12Z)/18:3(9Z,12Z,15Z)/0:0)', 'DG(18:3(9Z,12Z,15Z)/18:3(9Z,12Z,15Z)/0:0)', 'DG(18:4(6Z,9Z,12Z,15Z)/18:2(9Z,12Z)/0:0)']
671.547	81904.3	1.94065	0.0222136
673.505	152399	1.33575	0.266534	C39H66O5	[M+Hac-H]-	673.505	0.6	['DG(14:0/22:5(7Z,10Z,13Z,16Z,19Z)/0:0)', 'DG(14:1(9Z)/22:4(7Z,10Z,13Z,16Z)/0:0)', 'DG(16:0/20:5(5Z,8Z,11Z,14Z,17Z)/0:0)', 'DG(16:1(9Z)/20:4(5Z,8Z,11Z,14Z)/0:0)', 'DG(18:2(9Z,12Z)/18:3(9Z,12Z,15Z)/0:0)', 'DG(18:3(6Z,9Z,12Z)/18:2(9Z,12Z)/0:0)', 'DG(18:4(6Z,9Z,12Z,15Z)/18:1(9Z)/0:0)']
675.521	285096	1.4404	0.160753	C39H68O5	[M+Hac-H]-	675.521	0.52	['DG(14:0/22:4(7Z,10Z,13Z,16Z)/0:0)', 'DG(14:1(9Z)/22:3(10Z,13Z,16Z)/0:0)[iso2]', 'DG(16:0/20:4(5Z,8Z,11Z,14Z)/0:0)', 'DG(16:1(9Z)/20:3(8Z,11Z,14Z)/0:0)', 'DG(18:1(9Z)/18:3(9Z,12Z,15Z)/0:0)', 'DG(18:2(9Z,12Z)/18:2(9Z,12Z)/0:0)', 'DG(18:3(6Z,9Z,12Z)/18:1(9Z)/0:0)', 'DG(18:4(6Z,9Z,12Z,15Z)/18:0/0:0)']
677.537	173460	1.44875	0.104091	C39H70O5	[M+Hac-H]-	677.536	0.71	['DG(14:0/22:3(10Z,13Z,16Z)/0:0)[iso2]', 'DG(14:1(9Z)/22:2(13Z,16Z)/0:0)', 'DG(16:0/20:3(8Z,11Z,14Z)/0:0)', 'DG(16:1(9Z)/20:2(11Z,14Z)/0:0)', 'DG(18:0/18:3(9Z,12Z,15Z)/0:0)', 'DG(18:1(9Z)/18:2(9Z,12Z)/0:0)', 'DG(18:3(6Z,9Z,12Z)/18:0/0:0)', 'DG(19:1(9Z)/17:2(9Z,12Z)/0:0)[iso2]']
677.552	96530.5	1.29087	0.442036
679.552	86143.2	1.79601	0.0645301	C39H72O5	[M+Hac-H]-	679.552	0.27	['DG(14:0/22:2(13Z,16Z)/0:0)', 'DG(14:1(9Z)/22:1(11Z)/0:0)[iso2]', 'DG(16:0/20:2(11Z,14Z)/0:0)', 'DG(16:1(9Z)/20:1(11Z)/0:0)', 'DG(17:2(9Z,12Z)/19:0/0:0)[iso2]', 'DG(18:0/18:2(9Z,12Z)/0:0)', 'DG(18:1(9Z)/18:1(9Z)/0:0)', 'DG(19:1(9Z)/17:1(9Z)/0:0)[iso2]']
680.62	115135	1.05343	0.861207	C40H79NO3	[M+Hac-H]-	680.62	0.33	['Ceramide (d18:1/22:0)']
681.615	155342	1.79413	0.178413
682.599	129596	2.12615	0.0427892
685.563	106750	1.21849	0.292832	C40H78O8	[M-H]-	685.562	0.48	['NA']
687.545	142344	0.919453	0.748764	C38H77N2O6P	[M-H]-	687.545	0.2	['Etn-1-P-Cer(d14:1/18:0)', 'SM(d16:1/17:0)', 'SM(d18:1/15:0)']
688.548	62620.1	1.56102	0.193017
692.4	589839	17.8825	4.76e-06
693.366	13285.1	10.7397	0.000370274
693.372	26886.8	21.5104	1.34e-05
693.378	47812	38.2512	9.72e-07
693.384	86577.5	69.3759	3.76e-05
693.386	40832.2	0.0306118	8.07e-08	C35H54O10	[M+Hac-H]-	693.386	1.18	['Pandaroside B']
693.398	603056	0.00207269	3.84e-07	C36H64O10	[M+K-2H]-	693.399	-0.36	['NA']
693.41	5.06651e+07	40533.8	2.68e-06
693.412	1.32746e+07	9.42e-05	4.42e-09
693.429	168421	134.742	2.04e-07
693.436	70324.5	56.2619	1.36e-06
693.441	53640.3	9.77195	1.26e-05
693.447	41185.1	9.38485	1.61e-07	C37H69O8P	[M+Na-2H]-	693.448	-0.67	['PA(12:0/22:2(13Z,16Z))', 'PA(14:0/20:2(11Z,14Z))', 'PA(14:1(9Z)/20:1(11Z))', 'PA(15:1(9Z)/19:1(9Z))', 'PA(16:0/18:2(9Z,12Z))', 'PA(16:1(9Z)/18:1(9Z))', 'PA(17:0/17:2(9Z,12Z))', 'PA(17:1(9Z)/17:1(9Z))', 'PA(17:2(9Z,12Z)/17:0)', 'PA(18:1(9Z)/16:1(9Z))', 'PA(18:2(9Z,12Z)/16:0)', 'PA(19:1(9Z)/15:1(9Z))', 'PA(20:1(11Z)/14:1(9Z))', 'PA(20:2(11Z,14Z)/14:0)', 'PA(22:2(13Z,16Z)/12:0)']
694.382	43531.2	1.45899	0.0807957
694.416	5.98003e+06	0.00020902	4.42e-09
694.44	34693.1	17.2288	4.53e-07
694.446	21513.3	17.2113	1.68e-06	C38H66NO8P	[M-H]-	694.445	1.21	['PE(13:0/20:5(5Z,8Z,11Z,14Z,17Z))', 'PE(15:1(9Z)/18:4(6Z,9Z,12Z,15Z))', 'PE(18:4(6Z,9Z,12Z,15Z)/15:1(9Z))', 'PE(20:5(5Z,8Z,11Z,14Z,17Z)/13:0)']
694.452	19851.1	15.8815	4.87e-08
695.006	63529	0.360846	0.037178
695.386	57698.9	0.666851	0.184574
695.413	3.17092e+06	0.813461	0.519111
695.444	406572	0.401352	0.00630801	C43H64O5	[M+Cl]-	695.445	-1.74	['DG(18:4(6Z,9Z,12Z,15Z)/22:6(4Z,7Z,10Z,13Z,16Z,19Z)/0:0)', 'DG(20:5(5Z,8Z,11Z,14Z,17Z)/20:5(5Z,8Z,11Z,14Z,17Z)/0:0)']
695.444	406572	0.401352	0.00630801	C36H69O8P	[M+Cl]-	695.442	1.67	['PA(13:0/20:1(11Z))', 'PA(14:0/19:1(9Z))', 'PA(14:1(9Z)/19:0)', 'PA(15:0/18:1(9Z))', 'PA(15:1(9Z)/18:0)', 'PA(16:0/17:1(9Z))', 'PA(16:1(9Z)/17:0)', 'PA(17:0/16:1(9Z))', 'PA(17:1(9Z)/16:0)', 'PA(18:0/15:1(9Z))', 'PA(18:1(9Z)/15:0)', 'PA(19:0/14:1(9Z))', 'PA(19:1(9Z)/14:0)', 'PA(20:1(11Z)/13:0)']
695.444	406572	0.401352	0.00630801	C37H71O7P	[M+K-2H]-	695.442	1.75	['PA(O-16:0/18:2(9Z,12Z))', 'PA(P-16:0/18:1(9Z))', 'PA(P-18:0/16:1(9Z))', 'PA(P-20:0/14:1(9Z))']
695.468	33967.7	0.112111	0.000305584
696.448	199185	0.682111	0.0927551
696.454	65957.7	0.169165	0.000179707
696.46	38673.7	0.332919	0.0224551	C38H68NO8P	[M-H]-	696.461	-1.19	['PC(12:0/18:4(6Z,9Z,12Z,15Z))', 'PC(18:4(6Z,9Z,12Z,15Z)/12:0)', 'PE(13:0/20:4(5Z,8Z,11Z,14Z))', 'PE(15:0/18:4(6Z,9Z,12Z,15Z))', 'PE(15:1(9Z)/18:3(6Z,9Z,12Z))', 'PE(15:1(9Z)/18:3(9Z,12Z,15Z))', 'PE(18:3(6Z,9Z,12Z)/15:1(9Z))', 'PE(18:3(9Z,12Z,15Z)/15:1(9Z))', 'PE(18:4(6Z,9Z,12Z,15Z)/15:0)', 'PE(20:4(5Z,8Z,11Z,14Z)/13:0)']
696.497	223889	0.420796	9.3e-06	C39H72NO7P	[M-H]-	696.497	-1.04	['NA', 'PE(O-16:0/18:4(6Z,9Z,12Z,15Z))', 'PE(P-16:0/18:3(6Z,9Z,12Z))', 'PE(P-16:0/18:3(9Z,12Z,15Z))']
697.408	126377	0.610726	0.0144064	C42H60O7	[M+Na-2H]-	697.409	-0.41	['Neurosporaxanthin beta-D-glucopyranoside']
697.408	126377	0.610726	0.0144064	C35H59O8P	[M+Hac-H]-	697.409	-0.46	['PA(12:0/20:5(5Z,8Z,11Z,14Z,17Z))', 'PA(14:1(9Z)/18:4(6Z,9Z,12Z,15Z))', 'PA(18:4(6Z,9Z,12Z,15Z)/14:1(9Z))', 'PA(20:5(5Z,8Z,11Z,14Z,17Z)/12:0)']
697.434	9.34902e+06	0.638455	0.0149435
697.5	79092.9	0.171767	1.32e-05
698.411	27312.8	0.0455326	0.00014469
698.437	1.39746e+06	0.681004	0.0270892	C35H68NO9P	[M+Na-2H]-	698.438	-0.96	['PS(P-16:0/13:0)']
698.513	232707	0.553323	0.000158487	C39H74NO7P	[M-H]-	698.513	0.06	['PE(O-16:0/18:3(6Z,9Z,12Z))', 'PE(O-16:0/18:3(9Z,12Z,15Z))', 'PE(P-16:0/18:2(9Z,12Z))']
699.44	168937	0.608239	0.0140175	C43H66O5	[M+K-2H]-	699.44	0.24	['DG(18:3(6Z,9Z,12Z)/22:6(4Z,7Z,10Z,13Z,16Z,19Z)/0:0)', 'DG(18:3(9Z,12Z,15Z)/22:6(4Z,7Z,10Z,13Z,16Z,19Z)/0:0)', 'DG(18:4(6Z,9Z,12Z,15Z)/22:5(7Z,10Z,13Z,16Z,19Z)/0:0)', 'DG(20:4(5Z,8Z,11Z,14Z)/20:5(5Z,8Z,11Z,14Z,17Z)/0:0)']
699.516	69556.6	0.0179702	7.69e-16
699.578	119857	2.06946	0.0917254	C41H80O8	[M-H]-	699.578	0.18	['Crasseride 2a']
700.529	76284.1	0.240981	0.000102411	C39H76NO7P	[M-H]-	700.529	0.26	['PC(P-16:0/15:1(9Z))', 'PE(O-16:0/18:2(9Z,12Z))', 'PE(P-16:0/18:1(9Z))', 'PE(P-18:0/16:1(9Z))', 'PE(P-20:0/14:1(9Z))', 'PnE(16:0/18:1(9Z))']
701.023	209139	0.703745	0.256318
701.56	137188	1.44973	0.000256741	C39H79N2O6P	[M-H]-	701.56	-0.31	['SM(d16:1/18:0)', 'SM(d17:1/17:0)', 'SM(d18:1/16:0)']
705.544	621269	0.910734	0.724369	C44H76O5	[M+Na-2H]-	705.544	0.19	['DG(19:0/22:5(7Z,10Z,13Z,16Z,19Z)/0:0)[iso2]', 'DG(19:1(9Z)/22:4(7Z,10Z,13Z,16Z)/0:0)[iso2]', 'DG(20:5(5Z,8Z,11Z,14Z,17Z)/21:0/0:0)[iso2]']
706.548	267255	0.902043	0.69294
707.391	146748	2.66813	0.000324331	C36H63O10P	[M+Na-2H]-	707.391	1.23	['PG(12:0/18:4(6Z,9Z,12Z,15Z))', 'PG(18:4(6Z,9Z,12Z,15Z)/12:0)']
708.394	44655.1	5.03957	0.000356846	C35H61NO12	[M+Na-2H]-	708.394	0.58	['Oleandomycin']
709.022	179086	0.487502	0.0985332
709.407	2.11277e+06	1.60432	0.230173	C36H65O10P	[M+Na-2H]-	709.406	1.16	['PG(12:0/18:3(6Z,9Z,12Z))', 'PG(12:0/18:3(9Z,12Z,15Z))', 'PG(18:3(6Z,9Z,12Z)/12:0)', 'PG(18:3(9Z,12Z,15Z)/12:0)']
710.41	919298	1.59718	0.244456
710.477	156118	0.590779	0.0316644	C39H70NO8P	[M-H]-	710.477	-0.13	['PC(13:0/18:4(6Z,9Z,12Z,15Z))', 'PC(18:4(6Z,9Z,12Z,15Z)/13:0)', 'PE(12:0/22:4(7Z,10Z,13Z,16Z))', 'PE(14:0/20:4(5Z,8Z,11Z,14Z))', 'PE(14:1(9Z)/20:3(8Z,11Z,14Z))', 'PE(16:0/18:4(6Z,9Z,12Z,15Z))', 'PE(16:1(9Z)/18:3(6Z,9Z,12Z))', 'PE(16:1(9Z)/18:3(9Z,12Z,15Z))', 'PE(17:2(9Z,12Z)/17:2(9Z,12Z))', 'PE(18:3(6Z,9Z,12Z)/16:1(9Z))', 'PE(18:3(9Z,12Z,15Z)/16:1(9Z))', 'PE(18:4(6Z,9Z,12Z,15Z)/16:0)', 'PE(20:3(…
711.402	29651	0.59207	0.375849	C42H60O7	[M+Cl]-	711.403	-1.84	['Neurosporaxanthin beta-D-glucopyranoside']
711.402	29651	0.59207	0.375849	C39H63O8P	[M+Na-2H]-	711.401	1.79	['PA(14:1(9Z)/22:6(4Z,7Z,10Z,13Z,16Z,19Z))', 'PA(18:3(6Z,9Z,12Z)/18:4(6Z,9Z,12Z,15Z))', 'PA(18:3(9Z,12Z,15Z)/18:4(6Z,9Z,12Z,15Z))', 'PA(18:4(6Z,9Z,12Z,15Z)/18:3(6Z,9Z,12Z))', 'PA(18:4(6Z,9Z,12Z,15Z)/18:3(9Z,12Z,15Z))', 'PA(22:6(4Z,7Z,10Z,13Z,16Z,19Z)/14:1(9Z))']
711.402	29651	0.59207	0.375849	C35H65O10P	[M+Cl]-	711.401	1.49	['PG(12:0/17:2(9Z,12Z))', 'PG(14:1(9Z)/15:1(9Z))', 'PG(15:1(9Z)/14:1(9Z))', 'PG(17:2(9Z,12Z)/12:0)']
711.408	111059	0.274444	0.286947	C34H65O13P	[M-H]-	711.409	-1.67	['PI(12:0/13:0)', 'PI(13:0/12:0)']
711.423	7.05933e+06	0.405215	0.208953	C36H67O10P	[M+Na-2H]-	711.422	1.19	['PG(12:0/18:2(9Z,12Z))', 'PG(13:0/17:2(9Z,12Z))', 'PG(14:1(9Z)/16:1(9Z))', 'PG(15:1(9Z)/15:1(9Z))', 'PG(16:1(9Z)/14:1(9Z))', 'PG(17:2(9Z,12Z)/13:0)', 'PG(18:2(9Z,12Z)/12:0)']
711.438	46351.2	0.23705	0.194158	C37H71O8P	[M+K-2H]-	711.437	1.19	['PA(12:0/22:1(11Z))', 'PA(14:0/20:1(11Z))', 'PA(14:1(9Z)/20:0)', 'PA(15:0/19:1(9Z))', 'PA(15:1(9Z)/19:0)', 'PA(16:0/18:1(11Z))', 'PA(16:0/18:1(9Z))', 'PA(16:1(9Z)/18:0)', 'PA(17:0/17:1(9Z))', 'PA(17:1(9Z)/17:0)', 'PA(18:0/16:1(9Z))', 'PA(18:1(9Z)/16:0)', 'PA(19:0/15:1(9Z))', 'PA(19:1(9Z)/15:0)', 'PA(20:0/14:1(9Z))', 'PA(20:1(11Z)/14:0)', 'PA(22:1(11Z)/12:0)']
711.438	46351.2	0.23705	0.194158	C36H69O9P	[M+Cl]-	711.437	1.1	['PG(P-16:0/14:1(9Z))']
712.426	3.07956e+06	0.401609	0.205673
712.492	959171	0.63161	0.00541619	C39H72NO8P	[M-H]-	712.492	0	['PC(13:0/18:3(6Z,9Z,12Z))', 'PC(13:0/18:3(9Z,12Z,15Z))', 'PC(14:1(9Z)/17:2(9Z,12Z))', 'PC(17:2(9Z,12Z)/14:1(9Z))', 'PC(18:3(6Z,9Z,12Z)/13:0)', 'PC(18:3(9Z,12Z,15Z)/13:0)', 'PE(14:0/20:3(8Z,11Z,14Z))', 'PE(14:1(9Z)/20:2(11Z,14Z))', 'PE(16:0/18:3(6Z,9Z,12Z))', 'PE(16:0/18:3(9Z,12Z,15Z))', 'PE(16:1(9Z)/18:2(9Z,12Z))', 'PE(17:1(9Z)/17:2(9Z,12Z))', 'PE(17:2(9Z,12Z)/17:1(9Z))', 'PE(18:2(9Z,12Z)/16:1(9…
713.402	140796	0.833537	0.628134
713.429	692210	0.396717	0.19949
713.496	406601	0.630646	0.0050554
714.432	103232	0.244921	0.121146	C35H68NO10P	[M+Na-2H]-	714.433	-0.9	['PS(12:0/17:0)', 'PS(13:0/16:0)', 'PS(14:0/15:0)', 'PS(15:0/14:0)', 'PS(16:0/13:0)', 'PS(17:0/12:0)']
714.508	433394	0.656718	0.00456518	C39H74NO8P	[M-H]-	714.508	0.2	['PC(13:0/18:2(9Z,12Z))', 'PC(14:0/17:2(9Z,12Z))', 'PC(14:1(9Z)/17:1(9Z))', 'PC(15:1(9Z)/16:1(9Z))', 'PC(16:1(9Z)/15:1(9Z))', 'PC(17:1(9Z)/14:1(9Z))', 'PC(17:2(9Z,12Z)/14:0)', 'PC(18:2(9Z,12Z)/13:0)', 'PE(12:0/22:2(13Z,16Z))', 'PE(14:0/20:2(11Z,14Z))', 'PE(14:1(9Z)/20:1(11Z))', 'PE(15:1(9Z)/19:1(9Z))', 'PE(16:0/18:2(9Z,12Z))', 'PE(16:1(9Z)/18:1(9Z))', 'PE(17:0/17:2(9Z,12Z))', 'PE(17:1(9Z)/17:1(9Z…
715.038	394090	0.665942	0.219148
715.394	52927.2	42.3435	3.17e-06
715.418	70518.7	0.268883	0.0848388
715.511	151581	0.378815	0.00275749
716.524	330543	0.886388	0.253456	C39H76NO8P	[M-H]-	716.524	0.01	['PC(12:0/19:1(9Z))', 'PC(13:0/18:1(9Z))', 'PC(14:0/17:1(9Z))', 'PC(14:1(9Z)/17:0)', 'PC(15:0/16:1(9Z))', 'PC(15:1(9Z)/16:0)', 'PC(16:0/15:1(14))', 'PC(16:0/15:1(9Z))', 'PC(16:1(9Z)/15:0)', 'PC(17:0/14:1(9Z))', 'PC(17:1(9Z)/14:0)', 'PC(18:1(9Z)/13:0)', 'PC(19:1(9Z)/12:0)', 'PE(12:0/22:1(11Z))', 'PE(14:0/20:1(11Z))', 'PE(14:1(9Z)/20:0)', 'PE(15:0/19:1(9Z))', 'PE(15:1(9Z)/19:0)', 'PE(16:0/18:1(11Z)…
717.41	8.96024e+06	0.530187	0.00251527	C38H65O8P	[M+(37Cl)]-	717.408	1.92	['PA(15:0/20:5(5Z,8Z,11Z,14Z,17Z))', 'PA(15:1(9Z)/20:4(5Z,8Z,11Z,14Z))', 'PA(17:1(9Z)/18:4(6Z,9Z,12Z,15Z))', 'PA(17:2(9Z,12Z)/18:3(6Z,9Z,12Z))', 'PA(17:2(9Z,12Z)/18:3(9Z,12Z,15Z))', 'PA(18:3(6Z,9Z,12Z)/17:2(9Z,12Z))', 'PA(18:3(9Z,12Z,15Z)/17:2(9Z,12Z))', 'PA(18:4(6Z,9Z,12Z,15Z)/17:1(9Z))', 'PA(20:4(5Z,8Z,11Z,14Z)/15:1(9Z))', 'PA(20:5(5Z,8Z,11Z,14Z,17Z)/15:0)']
717.429	28337.5	0.247084	0.00113133	C35H69O10P	[M+(37Cl)]-	717.429	0.13	['PG(12:0/17:0)', 'PG(13:0/16:0)', 'PG(14:0/15:0)', 'PG(15:0/14:0)', 'PG(16:0/13:0)', 'PG(17:0/12:0)']
717.527	145495	0.904159	0.365073
718.392	22939.3	0.119414	1.7e-05
718.413	3.82819e+06	0.526054	0.00265344
719.416	847092	0.532182	0.00248013
719.447	278597	0.965805	0.783097
719.949	231649	0.956051	0.7215
720.456	254628	1.03858	0.782473
720.958	235351	1.03041	0.82762
721.965	105530	1.05403	0.716393
722.513	33605.7	0.0371946	1.1e-08	C41H74NO7P	[M-H]-	722.513	0.12	['PE(O-16:0/20:5(5Z,8Z,11Z,14Z,17Z))', 'PE(P-16:0/20:4(5Z,8Z,11Z,14Z))', 'PE(P-18:0/18:4(6Z,9Z,12Z,15Z))']
723.386	85596.2	7.00894	0.000439529
724.39	36579.8	29.3761	0.000253288
724.493	74392.8	0.705341	0.193017	C40H72NO8P	[M-H]-	724.492	0.39	['PC(12:0/20:4(5Z,8Z,11Z,14Z))', 'PC(14:0/18:4(6Z,9Z,12Z,15Z))', 'PC(14:0/18:4(9E,11E,13E,15E))', 'PC(14:1(9Z)/18:3(6Z,9Z,12Z))', 'PC(14:1(9Z)/18:3(9Z,12Z,15Z))', 'PC(16:0/16:4(2E,4E,12E,14E))', 'PC(16:2(2E,4E)/16:2(2E,4E))', 'PC(18:3(6Z,9Z,12Z)/14:1(9Z))', 'PC(18:3(9Z,12Z,15Z)/14:1(9Z))', 'PC(18:4(6Z,9Z,12Z,15Z)/14:0)', 'PC(20:4(5Z,8Z,11Z,14Z)/12:0)', 'PE(13:0/22:4(7Z,10Z,13Z,16Z))', 'PE(15:0/20…
724.529	90122.2	0.296339	0.000138742	C41H76NO7P	[M-H]-	724.529	0.2	['PE(O-16:0/20:4(5Z,8Z,11Z,14Z))', 'PE(O-18:0/18:4(6Z,9Z,12Z,15Z))', 'PE(P-16:0/20:3(8Z,11Z,14Z))', 'PE(P-18:0/18:3(6Z,9Z,12Z))', 'PE(P-18:0/18:3(9Z,12Z,15Z))']
725.402	592840	1.82328	0.0322862
726.405	254851	1.82139	0.0325811
726.508	154304	0.800432	0.0720887	C40H74NO8P	[M-H]-	726.508	0.07	['PC(12:0/20:3(8Z,11Z,14Z))', 'PC(14:0/18:3(6Z,9Z,12Z))', 'PC(14:0/18:3(9Z,12Z,15Z))', 'PC(14:1(9Z)/18:2(9Z,12Z))', 'PC(15:1(9Z)/17:2(9Z,12Z))', 'PC(17:2(9Z,12Z)/15:1(9Z))', 'PC(18:2(9Z,12Z)/14:1(9Z))', 'PC(18:3(6Z,9Z,12Z)/14:0)', 'PC(18:3(9Z,12Z,15Z)/14:0)', 'PC(20:3(8Z,11Z,14Z)/12:0)', 'PE(15:0/20:3(8Z,11Z,14Z))', 'PE(15:1(9Z)/20:2(11Z,14Z))', 'PE(17:0/18:3(6Z,9Z,12Z))', 'PE(17:0/18:3(9Z,12Z,15…
726.545	58560.1	0.251884	8.64e-06	C41H78NO7P	[M-H]-	726.544	0.31	['PC(P-16:0/17:2(9Z,12Z))', 'PE(O-16:0/20:3(8Z,11Z,14Z))', 'PE(O-18:0/18:3(6Z,9Z,12Z))', 'PE(O-18:0/18:3(9Z,12Z,15Z))', 'PE(P-16:0/20:2(11Z,14Z))', 'PE(P-18:0/18:2(9Z,12Z))']
727.418	1.20486e+06	1.05246	0.915452
728.421	515944	1.05737	0.907825
728.532	84089.4	0.583356	0.110288
729.424	107401	1.05246	0.929195
731.404	2.90485e+06	1.40789	0.449392
732.408	1.24227e+06	1.42946	0.4368	C34H66NO12P	[M+Na-2H]-	732.407	1.07	['Lipid X']
733.401	866231	1.3781	0.463364
733.575	448058	0.871276	0.618655	C46H80O5	[M+Na-2H]-	733.575	-0.09	['DG(21:0/22:5(7Z,10Z,13Z,16Z,19Z)/0:0)[iso2]']
734.405	369913	1.36378	0.485376
734.477	990502	0.573185	0.00372921	C41H70NO8P	[M-H]-	734.477	-0.11	['PE(14:0/22:6(4Z,7Z,10Z,13Z,16Z,19Z))', 'PE(16:1(9Z)/20:5(5Z,8Z,11Z,14Z,17Z))', 'PE(18:2(9Z,12Z)/18:4(6Z,9Z,12Z,15Z))', 'PE(18:3(6Z,9Z,12Z)/18:3(6Z,9Z,12Z))', 'PE(18:3(6Z,9Z,12Z)/18:3(9Z,12Z,15Z))', 'PE(18:3(9Z,12Z,15Z)/18:3(6Z,9Z,12Z))', 'PE(18:3(9Z,12Z,15Z)/18:3(9Z,12Z,15Z))', 'PE(18:4(6Z,9Z,12Z,15Z)/18:2(9Z,12Z))', 'PE(20:5(5Z,8Z,11Z,14Z,17Z)/16:1(9Z))', 'PE(22:6(4Z,7Z,10Z,13Z,16Z,19Z)/14:0)']
734.579	202381	0.904134	0.707629
735.48	430781	0.571989	0.00292468
736.492	1.73296e+06	0.569387	0.00235036	C41H72NO8P	[M-H]-	736.492	0.16	['PC(13:0/20:5(5Z,8Z,11Z,14Z,17Z))', 'PC(15:1(9Z)/18:4(6Z,9Z,12Z,15Z))', 'PC(18:4(6Z,9Z,12Z,15Z)/15:1(9Z))', 'PC(20:5(5Z,8Z,11Z,14Z,17Z)/13:0)', 'PE(14:1(9Z)/22:4(7Z,10Z,13Z,16Z))', 'PE(16:0/20:5(5Z,8Z,11Z,14Z,17Z))', 'PE(16:1(9Z)/20:4(5Z,8Z,11Z,14Z))', 'PE(18:1(9Z)/18:4(6Z,9Z,12Z,15Z))', 'PE(18:2(9Z,12Z)/18:3(6Z,9Z,12Z))', 'PE(18:2(9Z,12Z)/18:3(9Z,12Z,15Z))', 'PE(18:3(6Z,9Z,12Z)/18:2(9Z,12Z))', …
737.496	759699	0.583394	0.00318143
738.397	112437	2.74906	0.0955607
738.486	30753.8	0.439913	0.0123201
738.492	51825.1	0.409879	0.00360634	C35H70NO9P	[M+Hac-H]-	738.493	-0.62	['PS(O-16:0/13:0)']
738.508	3.03121e+06	0.589234	0.0025637	C41H74NO8P	[M-H]-	738.508	-0.11	['PC(13:0/20:4(5Z,8Z,11Z,14Z))', 'PC(15:0/18:4(6Z,9Z,12Z,15Z))', 'PC(15:1(9Z)/18:3(6Z,9Z,12Z))', 'PC(15:1(9Z)/18:3(9Z,12Z,15Z))', 'PC(18:3(6Z,9Z,12Z)/15:1(9Z))', 'PC(18:3(9Z,12Z,15Z)/15:1(9Z))', 'PC(18:4(6Z,9Z,12Z,15Z)/15:0)', 'PC(20:4(5Z,8Z,11Z,14Z)/13:0)', 'PE(14:0/22:4(7Z,10Z,13Z,16Z))', 'PE(16:0/20:4(5Z,8Z,11Z,14Z))', 'PE(16:1(9Z)/20:3(8Z,11Z,14Z))', 'PE(18:0/18:4(6Z,9Z,12Z,15Z))', 'PE(18:1(9…
739.391	331199	0.533493	0.0535392
739.511	1.3398e+06	0.587885	0.00236511
740.524	1.79594e+06	0.637216	0.00235036	C41H76NO8P	[M-H]-	740.524	0.12	['PC(13:0/20:3(8Z,11Z,14Z))', 'PC(15:0/18:3(6Z,9Z,12Z))', 'PC(15:0/18:3(9Z,12Z,15Z))', 'PC(15:1(9Z)/18:2(9Z,12Z))', 'PC(16:1(9Z)/17:2(9Z,12Z))', 'PC(17:2(9Z,12Z)/16:1(9Z))', 'PC(18:2(9Z,12Z)/15:1(9Z))', 'PC(18:3(6Z,9Z,12Z)/15:0)', 'PC(18:3(9Z,12Z,15Z)/15:0)', 'PC(20:3(8Z,11Z,14Z)/13:0)', 'PE(14:1(9Z)/22:2(13Z,16Z))', 'PE(16:0/20:3(8Z,11Z,14Z))', 'PE(16:1(9Z)/20:2(11Z,14Z))', 'PE(17:2(9Z,12Z)/19:1…
741.397	182203	1.49328	0.0206117
741.527	783360	0.627932	0.00221069
742.4	49294.1	2.70068	0.0306367
742.539	478077	0.336835	0.00149912	C39H74NO6P	[M+Hac-H]-	742.539	0.04	['NA']
742.539	478077	0.336835	0.00149912	C41H78NO8P	[M-H]-	742.539	0.04	['PC(13:0/20:2(11Z,14Z))', 'PC(14:1(9Z)/19:1(9Z))', 'PC(15:0/18:2(9Z,12Z))', 'PC(15:1(9Z)/18:1(9Z))', 'PC(16:0/17:2(9Z,12Z))', 'PC(16:1(9Z)/17:1(9Z))', 'PC(17:1(9Z)/16:1(9Z))', 'PC(17:2(9Z,12Z)/16:0)', 'PC(18:1(9Z)/15:1(9Z))', 'PC(18:2(9Z,12Z)/15:0)', 'PC(19:1(9Z)/14:1(9Z))', 'PC(20:2(11Z,14Z)/13:0)', 'PE(14:0/22:2(13Z,16Z))', 'PE(14:1(9Z)/22:1(11Z))', 'PE(16:0/20:2(11Z,14Z))', 'PE(16:1(9Z)/20:1(…
743.412	358976	0.587197	0.256318
743.487	190970	1.37144	0.00191496	C38H69O8P	[M+Hac-H]-	743.487	-0.22	['PA(15:0/20:3(8Z,11Z,14Z))', 'PA(15:1(9Z)/20:2(11Z,14Z))', 'PA(17:0/18:3(6Z,9Z,12Z))', 'PA(17:0/18:3(9Z,12Z,15Z))', 'PA(17:1(9Z)/18:2(9Z,12Z))', 'PA(17:2(9Z,12Z)/18:1(9Z))', 'PA(18:1(9Z)/17:2(9Z,12Z))', 'PA(18:2(9Z,12Z)/17:1(9Z))', 'PA(18:3(6Z,9Z,12Z)/17:0)', 'PA(18:3(9Z,12Z,15Z)/17:0)', 'PA(20:2(11Z,14Z)/15:1(9Z))', 'PA(20:3(8Z,11Z,14Z)/15:0)']
743.487	190970	1.37144	0.00191496	C40H73O10P	[M-H]-	743.487	-0.22	['PG(14:0/20:3(8Z,11Z,14Z))', 'PG(14:1(9Z)/20:2(11Z,14Z))', 'PG(16:0/18:3(6Z,9Z,12Z))', 'PG(16:0/18:3(9Z,12Z,15Z))', 'PG(16:1(9Z)/18:2(9Z,12Z))', 'PG(17:1(9Z)/17:2(9Z,12Z))', 'PG(17:2(9Z,12Z)/17:1(9Z))', 'PG(18:2(9Z,12Z)/16:1(9Z))', 'PG(18:3(6Z,9Z,12Z)/16:0)', 'PG(18:3(9Z,12Z,15Z)/16:0)', 'PG(20:2(11Z,14Z)/14:1(9Z))', 'PG(20:3(8Z,11Z,14Z)/14:0)']
743.542	223157	0.37145	0.000945712
744.416	148007	0.589765	0.256348
744.556	90305.7	1.0735	0.489971	C41H80NO8P	[M-H]-	744.555	0.86	['PC(13:0/20:1(11Z))', 'PC(14:0/19:1(9Z))', 'PC(14:1(9Z)/19:0)', 'PC(15:0/18:1(11Z))', 'PC(15:0/18:1(9Z))', 'PC(15:1(9Z)/18:0)', 'PC(16:0/17:1(9Z))', 'PC(16:1(9Z)/17:0)', 'PC(17:0/16:1(9Z))', 'PC(17:1(9Z)/16:0)', 'PC(18:0/15:1(9Z))', 'PC(18:1(9Z)/15:0)', 'PC(19:0/14:1(9Z))', 'PC(19:1(9Z)/14:0)', 'PC(20:1(11Z)/13:0)', 'PE(14:0/22:1(11Z))', 'PE(14:1(9Z)/22:0)', 'PE(15:1(9Z)/21:0)', 'PE(16:0/20:1(11…
747.399	404287	0.865516	0.800529
747.566	143808	1.39167	0.00139859	C38H77N2O6P	[M+Hac-H]-	747.566	-0.24	['Etn-1-P-Cer(d14:1/18:0)', 'SM(d16:1/17:0)', 'SM(d18:1/15:0)']
748.403	172454	0.852748	0.776596
749.396	106599	0.699002	0.587354	C41H63O8P	[M+Cl]-	749.395	0.63	['PA(18:4(6Z,9Z,12Z,15Z)/20:5(5Z,8Z,11Z,14Z,17Z))', 'PA(20:5(5Z,8Z,11Z,14Z,17Z)/18:4(6Z,9Z,12Z,15Z))']
753.386	142120	0.960096	0.878366
754.39	56341.5	0.928324	0.86961
756.482	53331.2	0.213941	3.51e-05	C38H68NO8P	[M+Hac-H]-	756.482	0.08	['PC(12:0/18:4(6Z,9Z,12Z,15Z))', 'PC(18:4(6Z,9Z,12Z,15Z)/12:0)', 'PE(13:0/20:4(5Z,8Z,11Z,14Z))', 'PE(15:0/18:4(6Z,9Z,12Z,15Z))', 'PE(15:1(9Z)/18:3(6Z,9Z,12Z))', 'PE(15:1(9Z)/18:3(9Z,12Z,15Z))', 'PE(18:3(6Z,9Z,12Z)/15:1(9Z))', 'PE(18:3(9Z,12Z,15Z)/15:1(9Z))', 'PE(18:4(6Z,9Z,12Z,15Z)/15:0)', 'PE(20:4(5Z,8Z,11Z,14Z)/13:0)']
756.482	53331.2	0.213941	3.51e-05	C40H72NO10P	[M-H]-	756.482	0.08	['PS(14:0/20:3(8Z,11Z,14Z))', 'PS(14:1(9Z)/20:2(11Z,14Z))', 'PS(16:0/18:3(6Z,9Z,12Z))', 'PS(16:0/18:3(9Z,12Z,15Z))', 'PS(16:1(9Z)/18:2(9Z,12Z))', 'PS(17:1(9Z)/17:2(9Z,12Z))', 'PS(17:2(9Z,12Z)/17:1(9Z))', 'PS(18:2(9Z,12Z)/16:1(9Z))', 'PS(18:3(6Z,9Z,12Z)/16:0)', 'PS(18:3(9Z,12Z,15Z)/16:0)', 'PS(20:2(11Z,14Z)/14:1(9Z))', 'PS(20:3(8Z,11Z,14Z)/14:0)']
758.423	272034	0.807842	0.63134
760.493	50934.4	0.126255	3.17e-05	C43H72NO8P	[M-H]-	760.492	0.3	['PE(16:1(9Z)/22:6(4Z,7Z,10Z,13Z,16Z,19Z))', 'PE(18:2(9Z,12Z)/20:5(5Z,8Z,11Z,14Z,17Z))', 'PE(18:3(6Z,9Z,12Z)/20:4(5Z,8Z,11Z,14Z))', 'PE(18:3(9Z,12Z,15Z)/20:4(5Z,8Z,11Z,14Z))', 'PE(18:4(6Z,9Z,12Z,15Z)/20:3(8Z,11Z,14Z))', 'PE(20:3(8Z,11Z,14Z)/18:4(6Z,9Z,12Z,15Z))', 'PE(20:4(5Z,8Z,11Z,14Z)/18:3(6Z,9Z,12Z))', 'PE(20:4(5Z,8Z,11Z,14Z)/18:3(9Z,12Z,15Z))', 'PE(20:5(5Z,8Z,11Z,14Z,17Z)/18:2(9Z,12Z))', 'PE(…
761.581	323990	1.41081	0.00110647	C39H79N2O6P	[M+Hac-H]-	761.581	-0.21	['SM(d16:1/18:0)', 'SM(d17:1/17:0)', 'SM(d18:1/16:0)']
762.508	186981	0.574572	0.000380439	C43H74NO8P	[M-H]-	762.508	0.04	['PC(13:0/22:6(4Z,7Z,10Z,13Z,16Z,19Z))', 'PC(15:1(9Z)/20:5(5Z,8Z,11Z,14Z,17Z))', 'PC(17:2(9Z,12Z)/18:4(6Z,9Z,12Z,15Z))', 'PC(18:4(6Z,9Z,12Z,15Z)/17:2(9Z,12Z))', 'PC(20:5(5Z,8Z,11Z,14Z,17Z)/15:1(9Z))', 'PC(22:6(4Z,7Z,10Z,13Z,16Z,19Z)/13:0)', 'PE(16:0/22:6(4Z,7Z,10Z,13Z,16Z,19Z))', 'PE(18:1(9Z)/20:5(5Z,8Z,11Z,14Z,17Z))', 'PE(18:2(9Z,12Z)/20:4(5Z,8Z,11Z,14Z))', 'PE(18:3(6Z,9Z,12Z)/20:3(8Z,11Z,14Z))'…
762.585	125953	1.42011	0.0011455
763.394	114120	2.32127	0.248742
763.511	75128.1	0.362152	0.00127264
764.487	80492.3	64.5076	0.000393293	C42H72NO9P	[M-H]-	764.487	0.11	['PS(P-16:0/20:5(5Z,8Z,11Z,14Z,17Z))']
764.524	165857	0.640871	0.00158035	C43H76NO8P	[M-H]-	764.524	0.27	['PC(15:0/20:5(5Z,8Z,11Z,14Z,17Z))', 'PC(15:1(9Z)/20:4(5Z,8Z,11Z,14Z))', 'PC(17:1(9Z)/18:4(6Z,9Z,12Z,15Z))', 'PC(17:2(9Z,12Z)/18:3(6Z,9Z,12Z))', 'PC(17:2(9Z,12Z)/18:3(9Z,12Z,15Z))', 'PC(18:3(6Z,9Z,12Z)/17:2(9Z,12Z))', 'PC(18:3(9Z,12Z,15Z)/17:2(9Z,12Z))', 'PC(18:4(6Z,9Z,12Z,15Z)/17:1(9Z))', 'PC(20:4(5Z,8Z,11Z,14Z)/15:1(9Z))', 'PC(20:5(5Z,8Z,11Z,14Z,17Z)/15:0)', 'PE(16:1(9Z)/22:4(7Z,10Z,13Z,16Z))',…
765.527	135348	0.919319	0.429824
766.503	98617.9	78.8975	0.000143954	C42H74NO9P	[M-H]-	766.503	0.61	['PS(O-16:0/20:5(5Z,8Z,11Z,14Z,17Z))', 'PS(P-16:0/20:4(5Z,8Z,11Z,14Z))', 'PS(P-18:0/18:4(6Z,9Z,12Z,15Z))']
766.523	11175.9	0.47201	0.0239839	C37H74NO9P	[M+Hac-H]-	766.524	-1.14	['PS(O-16:0/15:0)', 'PS(O-18:0/13:0)']
766.54	253029	1.08726	0.402514	C43H78NO8P	[M-H]-	766.539	0.51	['PC(13:0/22:4(7Z,10Z,13Z,16Z))', 'PC(15:0/20:4(5Z,8Z,11Z,14Z))', 'PC(15:1(9Z)/20:3(8Z,11Z,14Z))', 'PC(17:0/18:4(6Z,9Z,12Z,15Z))', 'PC(17:1(9Z)/18:3(6Z,9Z,12Z))', 'PC(17:1(9Z)/18:3(9Z,12Z,15Z))', 'PC(17:2(9Z,12Z)/18:2(9Z,12Z))', 'PC(18:2(9Z,12E)/17:2(9Z,11E))', 'PC(18:2(9Z,12Z)/17:2(9Z,12Z))', 'PC(18:3(6Z,9Z,12Z)/17:1(9Z))', 'PC(18:3(9Z,12Z,15Z)/17:1(9Z))', 'PC(18:4(6Z,9Z,12Z,15Z)/17:0)', 'PC(20:…
767.506	46916.6	37.5349	0.000179287	C37H73O10P	[M+Hac-H]-	767.508	-1.98	['PG(12:0/19:0)', 'PG(13:0/18:0)', 'PG(14:0/17:0)', 'PG(15:0/16:0)', 'PG(16:0/15:0)', 'PG(17:0/14:0)', 'PG(18:0/13:0)', 'PG(19:0/12:0)']
767.506	46916.6	37.5349	0.000179287	C39H77O12P	[M-H]-	767.508	-1.98	['PI(O-16:0/14:0)', 'PI(O-18:0/12:0)']
767.543	121823	1.07614	0.460667
768.519	56043.4	44.8365	0.000109401	C42H76NO9P	[M-H]-	768.518	0.99	['PS(O-16:0/20:4(5Z,8Z,11Z,14Z))', 'PS(O-18:0/18:4(6Z,9Z,12Z,15Z))', 'PS(P-16:0/20:3(8Z,11Z,14Z))', 'PS(P-18:0/18:3(6Z,9Z,12Z))', 'PS(P-18:0/18:3(9Z,12Z,15Z))']
768.555	143153	0.858545	0.0926799	C43H80NO8P	[M-H]-	768.555	0.45	['PC(15:0/20:3(8Z,11Z,14Z))', 'PC(15:1(9Z)/20:2(11Z,14Z))', 'PC(17:0/18:3(6Z,9Z,12Z))', 'PC(17:0/18:3(9Z,12Z,15Z))', 'PC(17:1(9Z)/18:2(9Z,12Z))', 'PC(17:2(9Z,12Z)/18:1(9Z))', 'PC(18:1(9Z)/17:2(9Z,12Z))', 'PC(18:2(9Z,12Z)/17:1(9Z))', 'PC(18:3(6Z,9Z,12Z)/17:0)', 'PC(18:3(9Z,12Z,15Z)/17:0)', 'PC(20:2(11Z,14Z)/15:1(9Z))', 'PC(20:3(8Z,11Z,14Z)/15:0)', 'PE(16:1(9Z)/22:2(13Z,16Z))', 'PE(18:0/20:3(8Z,11Z…
769.522	26815.8	21.4535	0.000214864
769.558	71218.8	0.855897	0.112582
770.497	32391.5	1.9762	0.122228	C39H70NO8P	[M+Hac-H]-	770.498	-0.9	['PC(13:0/18:4(6Z,9Z,12Z,15Z))', 'PC(18:4(6Z,9Z,12Z,15Z)/13:0)', 'PE(12:0/22:4(7Z,10Z,13Z,16Z))', 'PE(14:0/20:4(5Z,8Z,11Z,14Z))', 'PE(14:1(9Z)/20:3(8Z,11Z,14Z))', 'PE(16:0/18:4(6Z,9Z,12Z,15Z))', 'PE(16:1(9Z)/18:3(6Z,9Z,12Z))', 'PE(16:1(9Z)/18:3(9Z,12Z,15Z))', 'PE(17:2(9Z,12Z)/17:2(9Z,12Z))', 'PE(18:3(6Z,9Z,12Z)/16:1(9Z))', 'PE(18:3(9Z,12Z,15Z)/16:1(9Z))', 'PE(18:4(6Z,9Z,12Z,15Z)/16:0)', 'PE(20:3(…
770.497	32391.5	1.9762	0.122228	C41H74NO10P	[M-H]-	770.498	-0.9	['PS(15:0/20:3(8Z,11Z,14Z))', 'PS(15:1(9Z)/20:2(11Z,14Z))', 'PS(17:0/18:3(6Z,9Z,12Z))', 'PS(17:0/18:3(9Z,12Z,15Z))', 'PS(17:1(9Z)/18:2(9Z,12Z))', 'PS(17:2(9Z,12Z)/18:1(9Z))', 'PS(18:1(9Z)/17:2(9Z,12Z))', 'PS(18:2(9Z,12Z)/17:1(9Z))', 'PS(18:3(6Z,9Z,12Z)/17:0)', 'PS(18:3(9Z,12Z,15Z)/17:0)', 'PS(20:2(11Z,14Z)/15:1(9Z))', 'PS(20:3(8Z,11Z,14Z)/15:0)']
770.535	20992.6	16.7948	0.000238847	C42H78NO9P	[M-H]-	770.534	1.01	['PS(O-16:0/20:3(8Z,11Z,14Z))', 'PS(O-18:0/18:3(6Z,9Z,12Z))', 'PS(O-18:0/18:3(9Z,12Z,15Z))', 'PS(P-16:0/20:2(11Z,14Z))', 'PS(P-18:0/18:2(9Z,12Z))']
770.571	42651.2	0.922896	0.448293	C44H81NO7	[M+Cl]-	770.571	0.84	['DGTS(16:0/18:2(9Z,12Z))']
770.571	42651.2	0.922896	0.448293	C43H82NO8P	[M-H]-	770.571	1.06	['PC(13:0/22:2(13Z,16Z))', 'PC(15:0/20:2(11Z,14Z))', 'PC(15:1(9Z)/20:1(11Z))', 'PC(16:1(9Z)/19:1(9Z))', 'PC(17:0/18:2(9Z,12Z))', 'PC(17:1(9Z)/18:1(9Z))', 'PC(17:2(9Z,12Z)/18:0)', 'PC(18:0/17:2(9Z,12Z))', 'PC(18:1(9Z)/17:1(9Z))', 'PC(18:2(9Z,12Z)/17:0)', 'PC(19:1(9Z)/16:1(9Z))', 'PC(20:1(11Z)/15:1(9Z))', 'PC(20:2(11Z,14Z)/15:0)', 'PC(22:2(13Z,16Z)/13:0)', 'PE(16:0/22:2(13Z,16Z))', 'PE(16:1(9Z)/22:…
771.638	15146.6	1.73003	0.0720887	C44H89N2O6P	[M-H]-	771.639	-0.13	['SM(d16:1/23:0)', 'SM(d17:1/22:0)', 'SM(d18:1/21:0)', 'SM(d19:1/20:0)', 'SM(d20:1/19:0)']
772.513	30622.7	1.36609	0.209235	C39H72NO8P	[M+Hac-H]-	772.513	-0.36	['PC(13:0/18:3(6Z,9Z,12Z))', 'PC(13:0/18:3(9Z,12Z,15Z))', 'PC(14:1(9Z)/17:2(9Z,12Z))', 'PC(17:2(9Z,12Z)/14:1(9Z))', 'PC(18:3(6Z,9Z,12Z)/13:0)', 'PC(18:3(9Z,12Z,15Z)/13:0)', 'PE(14:0/20:3(8Z,11Z,14Z))', 'PE(14:1(9Z)/20:2(11Z,14Z))', 'PE(16:0/18:3(6Z,9Z,12Z))', 'PE(16:0/18:3(9Z,12Z,15Z))', 'PE(16:1(9Z)/18:2(9Z,12Z))', 'PE(17:1(9Z)/17:2(9Z,12Z))', 'PE(17:2(9Z,12Z)/17:1(9Z))', 'PE(18:2(9Z,12Z)/16:1(9…
772.513	30622.7	1.36609	0.209235	C41H76NO10P	[M-H]-	772.513	-0.36	['PS(13:0/22:2(13Z,16Z))', 'PS(15:0/20:2(11Z,14Z))', 'PS(15:1(9Z)/20:1(11Z))', 'PS(16:1(9Z)/19:1(9Z))', 'PS(17:0/18:2(9Z,12Z))', 'PS(17:1(9Z)/18:1(9Z))', 'PS(17:2(9Z,12Z)/18:0)', 'PS(18:0/17:2(9Z,12Z))', 'PS(18:1(9Z)/17:1(9Z))', 'PS(18:2(9Z,12Z)/17:0)', 'PS(19:1(9Z)/16:1(9Z))', 'PS(20:1(11Z)/15:1(9Z))', 'PS(20:2(11Z,14Z)/15:0)', 'PS(22:2(13Z,16Z)/13:0)']
774.529	13475.5	0.56479	0.165624	C39H74NO8P	[M+Hac-H]-	774.529	0.21	['PC(13:0/18:2(9Z,12Z))', 'PC(14:0/17:2(9Z,12Z))', 'PC(14:1(9Z)/17:1(9Z))', 'PC(15:1(9Z)/16:1(9Z))', 'PC(16:1(9Z)/15:1(9Z))', 'PC(17:1(9Z)/14:1(9Z))', 'PC(17:2(9Z,12Z)/14:0)', 'PC(18:2(9Z,12Z)/13:0)', 'PE(12:0/22:2(13Z,16Z))', 'PE(14:0/20:2(11Z,14Z))', 'PE(14:1(9Z)/20:1(11Z))', 'PE(15:1(9Z)/19:1(9Z))', 'PE(16:0/18:2(9Z,12Z))', 'PE(16:1(9Z)/18:1(9Z))', 'PE(17:0/17:2(9Z,12Z))', 'PE(17:1(9Z)/17:1(9Z…
774.529	13475.5	0.56479	0.165624	C41H78NO10P	[M-H]-	774.529	0.21	['PS(13:0/22:1(11Z))', 'PS(14:1(9Z)/21:0)', 'PS(15:0/20:1(11Z))', 'PS(15:1(9Z)/20:0)', 'PS(16:0/19:1(9Z))', 'PS(16:1(9Z)/19:0)', 'PS(17:0/18:1(9Z))', 'PS(17:1(9Z)/18:0)', 'PS(18:0/17:1(9Z))', 'PS(18:1(9Z)/17:0)', 'PS(19:0/16:1(9Z))', 'PS(19:1(9Z)/16:0)', 'PS(20:0/15:1(9Z))', 'PS(20:1(11Z)/15:0)', 'PS(21:0/14:1(9Z))', 'PS(22:1(11Z)/13:0)']
775.597	73832.2	1.33867	0.00136259	C40H81N2O6P	[M+Hac-H]-	775.597	0.08	['SM(d18:1/17:0)', 'SM(d19:1/16:0)']
776.545	64014.6	1.40526	0.00345515	C42H79NO9	[M+Cl]-	776.545	-0.07	['NA']
776.545	64014.6	1.40526	0.00345515	C39H76NO8P	[M+Hac-H]-	776.545	0.15	['PC(12:0/19:1(9Z))', 'PC(13:0/18:1(9Z))', 'PC(14:0/17:1(9Z))', 'PC(14:1(9Z)/17:0)', 'PC(15:0/16:1(9Z))', 'PC(15:1(9Z)/16:0)', 'PC(16:0/15:1(14))', 'PC(16:0/15:1(9Z))', 'PC(16:1(9Z)/15:0)', 'PC(17:0/14:1(9Z))', 'PC(17:1(9Z)/14:0)', 'PC(18:1(9Z)/13:0)', 'PC(19:1(9Z)/12:0)', 'PE(12:0/22:1(11Z))', 'PE(14:0/20:1(11Z))', 'PE(14:1(9Z)/20:0)', 'PE(15:0/19:1(9Z))', 'PE(15:1(9Z)/19:0)', 'PE(16:0/18:1(11Z)…
776.545	64014.6	1.40526	0.00345515	C41H80NO10P	[M-H]-	776.545	0.15	['PS(13:0/22:0)', 'PS(14:0/21:0)', 'PS(15:0/20:0)', 'PS(16:0/19:0)', 'PS(17:0/18:0)', 'PS(18:0/17:0)', 'PS(19:0/16:0)', 'PS(20:0/15:0)', 'PS(21:0/14:0)', 'PS(22:0/13:0)']
776.601	32496.2	1.36366	0.000792084	C44H85NO8	[M+Na-2H]-	776.602	-1.97	['GalCer(d16:1/22:0)', 'GalCer(d18:1/20:0)', 'GlcCer(d16:1/22:0)', 'GlcCer(d18:1/20:0)']
777.549	23143.1	1.56206	0.00360446	C43H80O10	[M+Na-2H]-	777.55	-0.44	['MGDG(16:0/18:1(9Z))']
778.466	15933.8	0.217951	8.14e-06	C42H70NO10P	[M-H]-	778.466	-0.77	['PS(14:0/22:6(4Z,7Z,10Z,13Z,16Z,19Z))', 'PS(16:1(9Z)/20:5(5Z,8Z,11Z,14Z,17Z))', 'PS(18:2(9Z,12Z)/18:4(6Z,9Z,12Z,15Z))', 'PS(18:3(6Z,9Z,12Z)/18:3(6Z,9Z,12Z))', 'PS(18:3(6Z,9Z,12Z)/18:3(9Z,12Z,15Z))', 'PS(18:3(9Z,12Z,15Z)/18:3(6Z,9Z,12Z))', 'PS(18:3(9Z,12Z,15Z)/18:3(9Z,12Z,15Z))', 'PS(18:4(6Z,9Z,12Z,15Z)/18:2(9Z,12Z))', 'PS(20:5(5Z,8Z,11Z,14Z,17Z)/16:1(9Z))', 'PS(22:6(4Z,7Z,10Z,13Z,16Z,19Z)/14:0)']
778.503	17945.9	14.3573	2.26e-06	C43H74NO9P	[M-H]-	778.503	0.33	['PE(16:0/22:6(54Z,7Z,10Z,12E,16Z,19Z)(14OH))']
778.561	35750.6	1.4451	0.00469256	C39H78NO8P	[M+Hac-H]-	778.56	0.73	['PC(10:0/21:0)', 'PC(11:0/20:0)', 'PC(12:0/19:0)', 'PC(13:0/18:0)', 'PC(14:0/17:0)', 'PC(15:0/16:0)', 'PC(16:0/15:0)', 'PC(17:0/14:0)', 'PC(18:0/13:0)', 'PC(19:0/12:0)', 'PC(20:0/11:0)', 'PC(21:0/10:0)', 'PC(9:0/22:0)', 'PE(12:0/22:0)', 'PE(13:0/21:0)', 'PE(14:0/20:0)', 'PE(15:0/19:0)', 'PE(16:0/18:0)', 'PE(17:0/17:0)', 'PE(18:0/16:0)', 'PE(19:0/15:0)', 'PE(20:0/14:0)', 'PE(21:0/13:0)', 'PE(22:0…
779.617	186442	1.23124	0.266339	C48H86O6	[M+Na-2H]-	779.617	-0.1	['TG(12:0/13:0/20:3(8Z,11Z,14Z))[iso6]', 'TG(12:0/15:0/18:3(6Z,9Z,12Z))[iso6]', 'TG(12:0/15:0/18:3(9Z,12Z,15Z))[iso6]', 'TG(12:0/15:1(9Z)/18:2(9Z,12Z))[iso6]', 'TG(12:0/16:1(9Z)/17:2(9Z,12Z))[iso6]', 'TG(13:0/14:0/18:3(6Z,9Z,12Z))[iso6]', 'TG(13:0/14:0/18:3(9Z,12Z,15Z))[iso6]', 'TG(13:0/14:1(9Z)/18:2(9Z,12Z))[iso6]', 'TG(13:0/15:1(9Z)/17:2(9Z,12Z))[iso6]', 'TG(14:0/14:1(9Z)/17:2(9Z,12Z))[iso6]', …
780.482	47143.2	0.528531	0.000346836	C40H68NO8P	[M+Hac-H]-	780.482	-0.47	['PE(13:0/22:6(4Z,7Z,10Z,13Z,16Z,19Z))', 'PE(15:1(9Z)/20:5(5Z,8Z,11Z,14Z,17Z))', 'PE(17:2(9Z,12Z)/18:4(6Z,9Z,12Z,15Z))', 'PE(18:4(6Z,9Z,12Z,15Z)/17:2(9Z,12Z))', 'PE(20:5(5Z,8Z,11Z,14Z,17Z)/15:1(9Z))', 'PE(22:6(4Z,7Z,10Z,13Z,16Z,19Z)/13:0)']
780.482	47143.2	0.528531	0.000346836	C42H72NO10P	[M-H]-	780.482	-0.47	['PS(14:1(9Z)/22:4(7Z,10Z,13Z,16Z))', 'PS(16:0/20:5(5Z,8Z,11Z,14Z,17Z))', 'PS(16:1(9Z)/20:4(5Z,8Z,11Z,14Z))', 'PS(18:1(9Z)/18:4(6Z,9Z,12Z,15Z))', 'PS(18:2(9Z,12Z)/18:3(6Z,9Z,12Z))', 'PS(18:2(9Z,12Z)/18:3(9Z,12Z,15Z))', 'PS(18:3(6Z,9Z,12Z)/18:2(9Z,12Z))', 'PS(18:3(9Z,12Z,15Z)/18:2(9Z,12Z))', 'PS(18:4(6Z,9Z,12Z,15Z)/18:1(9Z))', 'PS(20:4(5Z,8Z,11Z,14Z)/16:1(9Z))', 'PS(20:5(5Z,8Z,11Z,14Z,17Z)/16:0)',…
780.519	29440.6	23.5534	1.59e-06	C41H72NO7P	[M+Hac-H]-	780.518	0.02	['PE(P-16:0/20:5(5Z,8Z,11Z,14Z,17Z))']
780.62	90315.3	1.2558	0.225274
781.485	17235.2	0.266207	4.96e-05
781.523	11998.4	9.71023	0.000179707	C38H75O10P	[M+Hac-H]-	781.524	-1.35	['PG(12:0/20:0)', 'PG(13:0/19:0)', 'PG(14:0/18:0)', 'PG(15:0/17:0)', 'PG(16:0/16:0)', 'PG(17:0/15:0)', 'PG(18:0/14:0)', 'PG(19:0/13:0)', 'PG(20:0/12:0)']
781.523	11998.4	9.71023	0.000179707	C40H79O12P	[M-H]-	781.524	-1.35	['PI(O-16:0/15:0)', 'PI(O-18:0/13:0)']
781.551	32349.8	1.41441	0.0844672	C42H83O8P	[M+Cl]-	781.552	-0.75	['PA(17:0/22:0)', 'PA(18:0/21:0)', 'PA(19:0/20:0)', 'PA(20:0/19:0)', 'PA(21:0/18:0)', 'PA(22:0/17:0)']
781.551	32349.8	1.41441	0.0844672	C43H85O7P	[M+K-2H]-	781.552	-0.68	['PA(O-18:0/22:1(11Z))', 'PA(O-20:0/20:1(11Z))', 'PA(P-18:0/22:0)', 'PA(P-20:0/20:0)']
782.498	115398	0.540792	0.000228111	C40H70NO8P	[M+Hac-H]-	782.498	-0.1	['PC(12:0/20:5(5Z,8Z,11Z,14Z,17Z))', 'PC(14:1(9Z)/18:4(6Z,9Z,12Z,15Z))', 'PC(18:4(6Z,9Z,12Z,15Z)/14:1(9Z))', 'PC(20:5(5Z,8Z,11Z,14Z,17Z)/12:0)', 'PE(15:0/20:5(5Z,8Z,11Z,14Z,17Z))', 'PE(15:1(9Z)/20:4(5Z,8Z,11Z,14Z))', 'PE(17:1(9Z)/18:4(6Z,9Z,12Z,15Z))', 'PE(17:2(9Z,12Z)/18:3(6Z,9Z,12Z))', 'PE(17:2(9Z,12Z)/18:3(9Z,12Z,15Z))', 'PE(18:3(6Z,9Z,12Z)/17:2(9Z,12Z))', 'PE(18:3(9Z,12Z,15Z)/17:2(9Z,12Z))', …
782.498	115398	0.540792	0.000228111	C42H74NO10P	[M-H]-	782.498	-0.1	['PS(14:0/22:4(7Z,10Z,13Z,16Z))', 'PS(16:0/20:4(5Z,8Z,11Z,14Z))', 'PS(16:1(9Z)/20:3(8Z,11Z,14Z))', 'PS(18:0/18:4(6Z,9Z,12Z,15Z))', 'PS(18:1(9Z)/18:3(6Z,9Z,12Z))', 'PS(18:1(9Z)/18:3(9Z,12Z,15Z))', 'PS(18:2(9Z,12Z)/18:2(9Z,12Z))', 'PS(18:3(6Z,9Z,12Z)/18:1(9Z))', 'PS(18:3(9Z,12Z,15Z)/18:1(9Z))', 'PS(18:4(6Z,9Z,12Z,15Z)/18:0)', 'PS(20:3(8Z,11Z,14Z)/16:1(9Z))', 'PS(20:4(5Z,8Z,11Z,14Z)/16:0)', 'PS(22:4…
782.535	17520.1	14.0167	1.7e-06	C43H78NO9P	[M-H]-	782.534	0.68	['PE(18:0/20:4(5Z,8Z,10E,14Z)(12OH[S]))', 'PE(18:0/20:4(5Z,8Z,11Z,13E)(15OH[S]))']
782.535	17520.1	14.0167	1.7e-06	C41H74NO7P	[M+Hac-H]-	782.534	0.68	['PE(O-16:0/20:5(5Z,8Z,11Z,14Z,17Z))', 'PE(P-16:0/20:4(5Z,8Z,11Z,14Z))', 'PE(P-18:0/18:4(6Z,9Z,12Z,15Z))']
783.026	38996.7	0.694159	0.295235
783.501	52777.1	0.477797	0.000215283
783.567	68719.4	0.785871	0.548297	C43H87O7P	[M+K-2H]-	783.568	-0.51	['PA(O-18:0/22:0)', 'PA(O-20:0/20:0)']
784.514	159006	0.558992	0.000149849	C40H72NO8P	[M+Hac-H]-	784.513	0.19	['PC(12:0/20:4(5Z,8Z,11Z,14Z))', 'PC(14:0/18:4(6Z,9Z,12Z,15Z))', 'PC(14:0/18:4(9E,11E,13E,15E))', 'PC(14:1(9Z)/18:3(6Z,9Z,12Z))', 'PC(14:1(9Z)/18:3(9Z,12Z,15Z))', 'PC(16:0/16:4(2E,4E,12E,14E))', 'PC(16:2(2E,4E)/16:2(2E,4E))', 'PC(18:3(6Z,9Z,12Z)/14:1(9Z))', 'PC(18:3(9Z,12Z,15Z)/14:1(9Z))', 'PC(18:4(6Z,9Z,12Z,15Z)/14:0)', 'PC(20:4(5Z,8Z,11Z,14Z)/12:0)', 'PE(13:0/22:4(7Z,10Z,13Z,16Z))', 'PE(15:0/20…
784.514	159006	0.558992	0.000149849	C42H76NO10P	[M-H]-	784.513	0.19	['PS(14:1(9Z)/22:2(13Z,16Z))', 'PS(16:0/20:3(8Z,11Z,14Z))', 'PS(16:1(9Z)/20:2(11Z,14Z))', 'PS(17:2(9Z,12Z)/19:1(9Z))', 'PS(18:0/18:3(6Z,9Z,12Z))', 'PS(18:0/18:3(9Z,12Z,15Z))', 'PS(18:1(9Z)/18:2(9Z,12Z))', 'PS(18:2(9Z,12Z)/18:1(9Z))', 'PS(18:3(6Z,9Z,12Z)/18:0)', 'PS(18:3(9Z,12Z,15Z)/18:0)', 'PS(19:1(9Z)/17:2(9Z,12Z))', 'PS(20:2(11Z,14Z)/16:1(9Z))', 'PS(20:3(8Z,11Z,14Z)/16:0)', 'PS(22:2(13Z,16Z)/14…
784.57	29919.5	0.736348	0.4832
785.459	44821.1	1.42809	0.669821	C39H73O12P	[M+Na-2H]-	785.459	0.86	['PI(P-16:0/14:1(9Z))']
785.517	74904.8	0.534438	0.000147277
786.513	5033.03	0.24168	6.14e-05
786.529	174757	0.892916	0.141402	C40H74NO8P	[M+Hac-H]-	786.529	0.41	['PC(12:0/20:3(8Z,11Z,14Z))', 'PC(14:0/18:3(6Z,9Z,12Z))', 'PC(14:0/18:3(9Z,12Z,15Z))', 'PC(14:1(9Z)/18:2(9Z,12Z))', 'PC(15:1(9Z)/17:2(9Z,12Z))', 'PC(17:2(9Z,12Z)/15:1(9Z))', 'PC(18:2(9Z,12Z)/14:1(9Z))', 'PC(18:3(6Z,9Z,12Z)/14:0)', 'PC(18:3(9Z,12Z,15Z)/14:0)', 'PC(20:3(8Z,11Z,14Z)/12:0)', 'PE(15:0/20:3(8Z,11Z,14Z))', 'PE(15:1(9Z)/20:2(11Z,14Z))', 'PE(17:0/18:3(6Z,9Z,12Z))', 'PE(17:0/18:3(9Z,12Z,15…
786.529	174757	0.892916	0.141402	C42H78NO10P	[M-H]-	786.529	0.41	['PS(14:0/22:2(13Z,16Z))', 'PS(14:1(9Z)/22:1(11Z))', 'PS(16:0/20:2(11Z,14Z))', 'PS(16:1(9Z)/20:1(11Z))', 'PS(17:1(9Z)/19:1(9Z))', 'PS(17:2(9Z,12Z)/19:0)', 'PS(18:0/18:2(9Z,12Z))', 'PS(18:1(9Z)/18:1(9Z))', 'PS(18:2(9Z,12Z)/18:0)', 'PS(19:0/17:2(9Z,12Z))', 'PS(19:1(9Z)/17:1(9Z))', 'PS(20:1(11Z)/16:1(9Z))', 'PS(20:2(11Z,14Z)/16:0)', 'PS(22:1(11Z)/14:1(9Z))', 'PS(22:2(13Z,16Z)/14:0)']
787.533	82118.7	0.857622	0.0607074
787.597	15042.8	1.15118	0.631812	C41H81N2O6P	[M+Hac-H]-	787.597	-0.25	['SM(d16:1/20:1)', 'SM(d18:0/18:2)', 'SM(d18:1/18:1(9Z))', 'SM(d18:2/18:0)', 'SM(d19:1/17:1)']
788.545	153066	1.17947	0.00434146	C44H81NO8	[M+K-2H]-	788.545	0.23	['GalCer(d18:2/20:1)', 'GlcCer(d18:2/20:1)']
788.545	153066	1.17947	0.00434146	C40H76NO8P	[M+Hac-H]-	788.545	0.38	['PC(12:0/20:2(11Z,14Z))', 'PC(14:0/18:2(11Z,14Z))', 'PC(14:0/18:2(9Z,12Z))', 'PC(14:1(9Z)/18:1(9Z))', 'PC(15:0/17:2(9Z,12Z))', 'PC(15:1(9Z)/17:1(9Z))', 'PC(16:1(9E)/16:1(9E))', 'PC(16:1(9Z)/16:1(9Z))', 'PC(17:1(9Z)/15:1(9Z))', 'PC(17:2(9Z,12Z)/15:0)', 'PC(18:1(9Z)/14:1(9Z))', 'PC(18:2(9Z,12Z)/14:0)', 'PC(20:2(11Z,14Z)/12:0)', 'PE(13:0/22:2(13Z,16Z))', 'PE(15:0/20:2(11Z,14Z))', 'PE(15:1(9Z)/20:1(…
788.545	153066	1.17947	0.00434146	C42H80NO10P	[M-H]-	788.545	0.38	['PS(14:0/22:1(11Z))', 'PS(14:1(9Z)/22:0)', 'PS(15:1(9Z)/21:0)', 'PS(16:0/20:1(11Z))', 'PS(16:1(9Z)/20:0)', 'PS(17:0/19:1(9Z))', 'PS(17:1(9Z)/19:0)', 'PS(18:0/18:1(9Z))', 'PS(18:1(9Z)/18:0)', 'PS(19:0/17:1(9Z))', 'PS(19:1(9Z)/17:0)', 'PS(20:0/16:1(9Z))', 'PS(20:1(11Z)/16:0)', 'PS(21:0/15:1(9Z))', 'PS(22:0/14:1(9Z))', 'PS(22:1(11Z)/14:0)']
789.548	71397.5	1.14102	0.0155311
789.613	146137	1.35252	0.00144446	C41H83N2O6P	[M+Hac-H]-	789.613	0.08	['SM(d16:1/20:0)', 'SM(d18:0/18:1(9Z))', 'SM(d18:1/18:0)']
790.516	13505.6	0.0925501	3.76e-05	C42H78NO8P	[M+Cl]-	790.516	0.62	['PC(14:0/20:3(8Z,11Z,14Z))', 'PC(14:1(9Z)/20:2(11Z,14Z))', 'PC(16:0/18:3(6Z,9Z,12Z))', 'PC(16:0/18:3(9Z,12Z,15Z))', 'PC(16:1(9Z)/18:2(9Z,12Z))', 'PC(17:1(9Z)/17:2(9Z,12Z))', 'PC(17:2(9Z,12Z)/17:1(9Z))', 'PC(18:2(9Z,12Z)/16:1(9Z))', 'PC(18:3(6Z,9Z,12Z)/16:0)', 'PC(18:3(9Z,12Z,15Z)/16:0)', 'PC(20:2(11Z,14Z)/14:1(9Z))', 'PC(20:3(8Z,11Z,14Z)/14:0)', 'PE(15:1(9Z)/22:2(13Z,16Z))', 'PE(17:0/20:3(8Z,11Z…
790.516	13505.6	0.0925501	3.76e-05	C43H80NO7P	[M+K-2H]-	790.516	0.7	['PC(O-15:0/20:4(5Z,8Z,11Z,14Z))', 'PE(O-16:0/22:4(7Z,10Z,13Z,16Z))', 'PE(O-18:0/20:4(5Z,8Z,11Z,14Z))', 'PE(O-20:0/18:4(6Z,9Z,12Z,15Z))', 'PE(P-18:0/20:3(8Z,11Z,14Z))', 'PE(P-20:0/18:3(6Z,9Z,12Z))', 'PE(P-20:0/18:3(9Z,12Z,15Z))']
790.543	14874.6	0.976411	0.848132
790.561	459227	1.38388	0.00046876	C44H83NO8	[M+K-2H]-	790.56	0.04	['GalCer(d18:2/20:0)', 'GlcCer(d18:2/20:0)']
790.561	459227	1.38388	0.00046876	C40H78NO8P	[M+Hac-H]-	790.56	0.19	['PC(12:0/20:1(11Z))', 'PC(13:0/19:1(9Z))', 'PC(14:0/18:1(11Z))', 'PC(14:0/18:1(9Z))', 'PC(14:1(9Z)/18:0)', 'PC(15:0/17:1(9Z))', 'PC(15:1(9Z)/17:0)', 'PC(16:0/16:1(9Z))', 'PC(16:1(9Z)/16:0)', 'PC(17:0/15:1(9Z))', 'PC(17:1(9Z)/15:0)', 'PC(18:0/14:1(9Z))', 'PC(18:1(9Z)/14:0)', 'PC(19:1(9Z)/13:0)', 'PC(20:1(11Z)/12:0)', 'PE(13:0/22:1(11Z))', 'PE(14:1(9Z)/21:0)', 'PE(15:0/20:1(11Z))', 'PE(15:1(9Z)/20…
790.561	459227	1.38388	0.00046876	C42H82NO10P	[M-H]-	790.56	0.19	['PS(14:0/22:0)', 'PS(15:0/21:0)', 'PS(16:0/20:0)', 'PS(17:0/19:0)', 'PS(18:0/18:0)', 'PS(19:0/17:0)', 'PS(20:0/16:0)', 'PS(21:0/15:0)', 'PS(22:0/14:0)']
790.616	68139.9	1.35296	0.00292584
791.024	38517.4	0.45585	0.088105
791.564	207232	1.3585	0.000296257
792.561	23018.5	1.0273	0.852682
792.577	159905	1.42349	0.000855004	C40H80NO8P	[M+Hac-H]-	792.576	0.81	['Colfosceril palmitate (USAN/INN)', 'PC(10:0/22:0)', 'PC(11:0/21:0)', 'PC(12:0/20:0)', 'PC(13:0/19:0)', 'PC(14:0/18:0)', 'PC(15:0/17:0)', 'PC(17:0/15:0)', 'PC(18:0/14:0)', 'PC(19:0/13:0)', 'PC(20:0/12:0)', 'PC(21:0/11:0)', 'PC(22:0/10:0)', 'PC(9:0/23:0)', 'PE(13:0/22:0)', 'PE(14:0/21:0)', 'PE(15:0/20:0)', 'PE(16:0/19:0)', 'PE(17:0/18:0)', 'PE(18:0(10(R)Me)/16:0)', 'PE(18:0/17:0)', 'PE(19:0/16:0)…
792.577	159905	1.42349	0.000855004	C44H85NO8	[M+K-2H]-	792.576	0.66	['GalCer(d16:1/22:0)', 'GalCer(d18:1/20:0)', 'GlcCer(d16:1/22:0)', 'GlcCer(d18:1/20:0)']
793.396	28984.3	0.510457	0.0283543
793.58	84222.2	1.42804	0.00145477	C43H85N2O6P	[M+(37Cl)]-	793.581	-1.64	['SM(d16:1/22:1)', 'SM(d18:1/20:1)', 'SM(d18:2/20:0)']
793.639	60205.7	1.25895	0.154425
794.497	18596	14.9885	5.22e-05	C41H70NO8P	[M+Hac-H]-	794.498	-0.87	['PE(14:0/22:6(4Z,7Z,10Z,13Z,16Z,19Z))', 'PE(16:1(9Z)/20:5(5Z,8Z,11Z,14Z,17Z))', 'PE(18:2(9Z,12Z)/18:4(6Z,9Z,12Z,15Z))', 'PE(18:3(6Z,9Z,12Z)/18:3(6Z,9Z,12Z))', 'PE(18:3(6Z,9Z,12Z)/18:3(9Z,12Z,15Z))', 'PE(18:3(9Z,12Z,15Z)/18:3(6Z,9Z,12Z))', 'PE(18:3(9Z,12Z,15Z)/18:3(9Z,12Z,15Z))', 'PE(18:4(6Z,9Z,12Z,15Z)/18:2(9Z,12Z))', 'PE(20:5(5Z,8Z,11Z,14Z,17Z)/16:1(9Z))', 'PE(22:6(4Z,7Z,10Z,13Z,16Z,19Z)/14:0)']
794.497	18596	14.9885	5.22e-05	C43H74NO10P	[M-H]-	794.498	-0.87	['PS(15:1(9Z)/22:4(7Z,10Z,13Z,16Z))', 'PS(17:0/20:5(5Z,8Z,11Z,14Z,17Z))', 'PS(17:1(9Z)/20:4(5Z,8Z,11Z,14Z))', 'PS(17:2(9Z,12Z)/20:3(8Z,11Z,14Z))', 'PS(18:4(6Z,9Z,12Z,15Z)/19:1(9Z))', 'PS(19:1(9Z)/18:4(6Z,9Z,12Z,15Z))', 'PS(20:3(8Z,11Z,14Z)/17:2(9Z,12Z))', 'PS(20:4(5Z,8Z,11Z,14Z)/17:1(9Z))', 'PS(20:5(5Z,8Z,11Z,14Z,17Z)/17:0)', 'PS(22:4(7Z,10Z,13Z,16Z)/15:1(9Z))']
794.582	18721.1	1.84124	0.0166217	C44H88NO6P	[M+K-2H]-	794.584	-1.84	['CerP(d18:1/26:0)', 'PC(O-18:1(9Z)/O-18:1(9Z))']
794.582	18721.1	1.84124	0.0166217	C43H86NO7P	[M+Cl]-	794.584	-1.92	['PC(O-16:0/19:1(9Z))', 'PC(O-17:0/18:1(9Z))', 'PC(O-18:0/17:1(9Z))', 'PC(O-20:0/15:1(9Z))', 'PC(P-16:0/19:0)', 'PC(P-18:0/17:0)', 'PC(P-20:0/15:0)', 'PE(O-16:0/22:1(11Z))', 'PE(O-18:0/20:1(11Z))', 'PE(O-20:0/18:1(9Z))', 'PE(P-16:0/22:0)', 'PE(P-18:0/20:0)', 'PE(P-20:0/18:0)']
794.642	31011.1	1.27966	0.0841724
796.513	38844.2	1.57135	4.61e-05	C41H72NO8P	[M+Hac-H]-	796.513	-0.69	['PC(13:0/20:5(5Z,8Z,11Z,14Z,17Z))', 'PC(15:1(9Z)/18:4(6Z,9Z,12Z,15Z))', 'PC(18:4(6Z,9Z,12Z,15Z)/15:1(9Z))', 'PC(20:5(5Z,8Z,11Z,14Z,17Z)/13:0)', 'PE(14:1(9Z)/22:4(7Z,10Z,13Z,16Z))', 'PE(16:0/20:5(5Z,8Z,11Z,14Z,17Z))', 'PE(16:1(9Z)/20:4(5Z,8Z,11Z,14Z))', 'PE(18:1(9Z)/18:4(6Z,9Z,12Z,15Z))', 'PE(18:2(9Z,12Z)/18:3(6Z,9Z,12Z))', 'PE(18:2(9Z,12Z)/18:3(9Z,12Z,15Z))', 'PE(18:3(6Z,9Z,12Z)/18:2(9Z,12Z))', …
796.513	38844.2	1.57135	4.61e-05	C43H76NO10P	[M-H]-	796.513	-0.69	['PS(15:0/22:4(7Z,10Z,13Z,16Z))', 'PS(17:0/20:4(5Z,8Z,11Z,14Z))', 'PS(17:1(9Z)/20:3(8Z,11Z,14Z))', 'PS(17:2(9Z,12Z)/20:2(11Z,14Z))', 'PS(18:3(6Z,9Z,12Z)/19:1(9Z))', 'PS(18:3(9Z,12Z,15Z)/19:1(9Z))', 'PS(18:4(6Z,9Z,12Z,15Z)/19:0)', 'PS(19:0/18:4(6Z,9Z,12Z,15Z))', 'PS(19:1(9Z)/18:3(6Z,9Z,12Z))', 'PS(19:1(9Z)/18:3(9Z,12Z,15Z))', 'PS(20:2(11Z,14Z)/17:2(9Z,12Z))', 'PS(20:3(8Z,11Z,14Z)/17:1(9Z))', 'PS(2…
796.586	8537.33	0.144066	0.000161166	C45H84NO8P	[M-H]-	796.586	-0.67	['PC(15:1(9Z)/22:2(13Z,16Z))', 'PC(17:0/20:3(8Z,11Z,14Z))', 'PC(17:1(9Z)/20:2(11Z,14Z))', 'PC(17:2(9Z,12Z)/20:1(11Z))', 'PC(18:2(9Z,12Z)/19:1(9Z))', 'PC(18:3(6Z,9Z,12Z)/19:0)', 'PC(18:3(9Z,12Z,15Z)/19:0)', 'PC(19:0/18:3(6Z,9Z,12Z))', 'PC(19:0/18:3(9Z,12Z,15Z))', 'PC(19:1(9Z)/18:2(9Z,12Z))', 'PC(20:1(11Z)/17:2(9Z,12Z))', 'PC(20:2(11Z,14Z)/17:1(9Z))', 'PC(20:3(8Z,11Z,14Z)/17:0)', 'PC(22:2(13Z,16Z)/…
797.041	82104	0.649603	0.225188
797.517	8239.6	6.70306	3.84e-05	C45H76O10	[M+Na-2H]-	797.519	-1.65	['MGDG(18:2(9Z,12Z)/18:3(9Z,12Z,15Z))']
797.67	44717.9	1.30405	0.0933053
798.529	62508.9	1.40708	0.000552347	C41H74NO8P	[M+Hac-H]-	798.529	-0.18	['PC(13:0/20:4(5Z,8Z,11Z,14Z))', 'PC(15:0/18:4(6Z,9Z,12Z,15Z))', 'PC(15:1(9Z)/18:3(6Z,9Z,12Z))', 'PC(15:1(9Z)/18:3(9Z,12Z,15Z))', 'PC(18:3(6Z,9Z,12Z)/15:1(9Z))', 'PC(18:3(9Z,12Z,15Z)/15:1(9Z))', 'PC(18:4(6Z,9Z,12Z,15Z)/15:0)', 'PC(20:4(5Z,8Z,11Z,14Z)/13:0)', 'PE(14:0/22:4(7Z,10Z,13Z,16Z))', 'PE(16:0/20:4(5Z,8Z,11Z,14Z))', 'PE(16:1(9Z)/20:3(8Z,11Z,14Z))', 'PE(18:0/18:4(6Z,9Z,12Z,15Z))', 'PE(18:1(9…
798.529	62508.9	1.40708	0.000552347	C43H78NO10P	[M-H]-	798.529	-0.18	['PS(15:1(9Z)/22:2(13Z,16Z))', 'PS(17:0/20:3(8Z,11Z,14Z))', 'PS(17:1(9Z)/20:2(11Z,14Z))', 'PS(17:2(9Z,12Z)/20:1(11Z))', 'PS(18:2(9Z,12Z)/19:1(9Z))', 'PS(18:3(6Z,9Z,12Z)/19:0)', 'PS(18:3(9Z,12Z,15Z)/19:0)', 'PS(19:0/18:3(6Z,9Z,12Z))', 'PS(19:0/18:3(9Z,12Z,15Z))', 'PS(19:1(9Z)/18:2(9Z,12Z))', 'PS(20:1(11Z)/17:2(9Z,12Z))', 'PS(20:2(11Z,14Z)/17:1(9Z))', 'PS(20:3(8Z,11Z,14Z)/17:0)', 'PS(22:2(13Z,16Z)/…
798.673	20195.9	1.2227	0.486691
799.413	92255.8	0.541388	0.0992518	C42H67O10P	[M+(37Cl)]-	799.414	-1.41	['PG(18:4(6Z,9Z,12Z,15Z)/18:4(6Z,9Z,12Z,15Z))']
799.413	92255.8	0.541388	0.0992518	C40H64O16	[M-H]-	799.412	0.43	['Spongipregnoloside D']
800.545	252073	1.29156	0.0155861	C41H76NO8P	[M+Hac-H]-	800.545	-0.19	['PC(13:0/20:3(8Z,11Z,14Z))', 'PC(15:0/18:3(6Z,9Z,12Z))', 'PC(15:0/18:3(9Z,12Z,15Z))', 'PC(15:1(9Z)/18:2(9Z,12Z))', 'PC(16:1(9Z)/17:2(9Z,12Z))', 'PC(17:2(9Z,12Z)/16:1(9Z))', 'PC(18:2(9Z,12Z)/15:1(9Z))', 'PC(18:3(6Z,9Z,12Z)/15:0)', 'PC(18:3(9Z,12Z,15Z)/15:0)', 'PC(20:3(8Z,11Z,14Z)/13:0)', 'PE(14:1(9Z)/22:2(13Z,16Z))', 'PE(16:0/20:3(8Z,11Z,14Z))', 'PE(16:1(9Z)/20:2(11Z,14Z))', 'PE(17:2(9Z,12Z)/19:1…
800.545	252073	1.29156	0.0155861	C43H80NO10P	[M-H]-	800.545	-0.19	['PS(15:0/22:2(13Z,16Z))', 'PS(15:1(9Z)/22:1(11Z))', 'PS(17:0/20:2(11Z,14Z))', 'PS(17:1(9Z)/20:1(11Z))', 'PS(17:2(9Z,12Z)/20:0)', 'PS(18:1(9Z)/19:1(9Z))', 'PS(18:2(9Z,12Z)/19:0)', 'PS(19:0/18:2(9Z,12Z))', 'PS(19:1(9Z)/18:1(9Z))', 'PS(20:0/17:2(9Z,12Z))', 'PS(20:1(11Z)/17:1(9Z))', 'PS(20:2(11Z,14Z)/17:0)', 'PS(22:1(11Z)/15:1(9Z))', 'PS(22:2(13Z,16Z)/15:0)']
801.549	91225.6	1.29864	0.00882149
802.561	161659	1.27357	0.0217432	C41H78NO8P	[M+Hac-H]-	802.56	0.47	['PC(13:0/20:2(11Z,14Z))', 'PC(14:1(9Z)/19:1(9Z))', 'PC(15:0/18:2(9Z,12Z))', 'PC(15:1(9Z)/18:1(9Z))', 'PC(16:0/17:2(9Z,12Z))', 'PC(16:1(9Z)/17:1(9Z))', 'PC(17:1(9Z)/16:1(9Z))', 'PC(17:2(9Z,12Z)/16:0)', 'PC(18:1(9Z)/15:1(9Z))', 'PC(18:2(9Z,12Z)/15:0)', 'PC(19:1(9Z)/14:1(9Z))', 'PC(20:2(11Z,14Z)/13:0)', 'PE(14:0/22:2(13Z,16Z))', 'PE(14:1(9Z)/22:1(11Z))', 'PE(16:0/20:2(11Z,14Z))', 'PE(16:1(9Z)/20:1(…
802.561	161659	1.27357	0.0217432	C43H82NO10P	[M-H]-	802.56	0.47	['PS(15:0/22:1(11Z))', 'PS(15:1(9Z)/22:0)', 'PS(16:1(9Z)/21:0)', 'PS(17:0/20:1(11Z))', 'PS(17:1(9Z)/20:0)', 'PS(18:0/19:1(9Z))', 'PS(18:1(9Z)/19:0)', 'PS(19:0/18:1(9Z))', 'PS(19:1(9Z)/18:0)', 'PS(20:0/17:1(9Z))', 'PS(20:1(11Z)/17:0)', 'PS(21:0/16:1(9Z))', 'PS(22:0/15:1(9Z))', 'PS(22:1(11Z)/15:0)', 'PT(18:0/18:1(9Z))']
803.471	29137.1	0.725138	0.0720887	C41H73O13P	[M-H]-	803.472	-0.32	['PI(12:0/20:3(8Z,11Z,14Z))', 'PI(14:0/18:3(6Z,9Z,12Z))', 'PI(14:0/18:3(9Z,12Z,15Z))', 'PI(14:1(9Z)/18:2(9Z,12Z))', 'PI(15:1(9Z)/17:2(9Z,12Z))', 'PI(17:2(9Z,12Z)/15:1(9Z))', 'PI(18:2(9Z,12Z)/14:1(9Z))', 'PI(18:3(6Z,9Z,12Z)/14:0)', 'PI(18:3(9Z,12Z,15Z)/14:0)', 'PI(20:3(8Z,11Z,14Z)/12:0)']
803.565	64019.9	1.32185	0.00401061	C45H82O10	[M+Na-2H]-	803.565	-0.65	['MGDG(18:0(9Z)/18:2(9Z,12Z))', 'MGDG(18:1(9Z)/18:1(9Z))']
803.628	56792.4	1.36968	0.0028017	C42H85N2O6P	[M+Hac-H]-	803.628	-0.22	['SM(d18:1/19:0)', 'SM(d19:1/18:0)']
804.576	195501	1.3892	0.00345515	C45H85NO8	[M+K-2H]-	804.576	-0.07	['GalCer(d18:2/21:0)', 'GlcCer(d18:2/21:0)']
804.576	195501	1.3892	0.00345515	C41H80NO8P	[M+Hac-H]-	804.576	0.07	['PC(13:0/20:1(11Z))', 'PC(14:0/19:1(9Z))', 'PC(14:1(9Z)/19:0)', 'PC(15:0/18:1(11Z))', 'PC(15:0/18:1(9Z))', 'PC(15:1(9Z)/18:0)', 'PC(16:0/17:1(9Z))', 'PC(16:1(9Z)/17:0)', 'PC(17:0/16:1(9Z))', 'PC(17:1(9Z)/16:0)', 'PC(18:0/15:1(9Z))', 'PC(18:1(9Z)/15:0)', 'PC(19:0/14:1(9Z))', 'PC(19:1(9Z)/14:0)', 'PC(20:1(11Z)/13:0)', 'PE(14:0/22:1(11Z))', 'PE(14:1(9Z)/22:0)', 'PE(15:1(9Z)/21:0)', 'PE(16:0/20:1(11…
804.576	195501	1.3892	0.00345515	C43H84NO10P	[M-H]-	804.576	0.07	['PS(15:0/22:0)', 'PS(16:0/21:0)', 'PS(17:0/20:0)', 'PS(18:0/19:0)', 'PS(19:0/18:0)', 'PS(20:0/17:0)', 'PS(21:0/16:0)', 'PS(22:0/15:0)']
804.632	22526.1	1.43933	0.00579551	C46H89NO8	[M+Na-2H]-	804.633	-1.59	['GalCer(d18:1/22:0)', 'GlcCer(d18:1/22:0)']
805.486	15216.9	0.246306	0.000142279	C41H75O13P	[M-H]-	805.487	-1.73	['PI(12:0/20:2(11Z,14Z))', 'PI(14:0/18:2(9Z,12Z))', 'PI(14:1(9Z)/18:1(9Z))', 'PI(15:0/17:2(9Z,12Z))', 'PI(15:1(9Z)/17:1(9Z))', 'PI(16:1(9Z)/16:1(9Z))', 'PI(17:1(9Z)/15:1(9Z))', 'PI(17:2(9Z,12Z)/15:0)', 'PI(18:1(9Z)/14:1(9Z))', 'PI(18:2(9Z,12Z)/14:0)', 'PI(20:2(11Z,14Z)/12:0)']
805.58	78756.1	1.35845	0.00135462
806.497	57944.3	0.50033	0.000196225	C42H70NO8P	[M+Hac-H]-	806.498	-1.5	['PE(15:1(9Z)/22:6(4Z,7Z,10Z,13Z,16Z,19Z))', 'PE(17:2(9Z,12Z)/20:5(5Z,8Z,11Z,14Z,17Z))', 'PE(20:5(5Z,8Z,11Z,14Z,17Z)/17:2(9Z,12Z))', 'PE(22:6(4Z,7Z,10Z,13Z,16Z,19Z)/15:1(9Z))']
806.497	57944.3	0.50033	0.000196225	C42H76NO10P	[M+Na-2H]-	806.495	1.48	['PS(14:1(9Z)/22:2(13Z,16Z))', 'PS(16:0/20:3(8Z,11Z,14Z))', 'PS(16:1(9Z)/20:2(11Z,14Z))', 'PS(17:2(9Z,12Z)/19:1(9Z))', 'PS(18:0/18:3(6Z,9Z,12Z))', 'PS(18:0/18:3(9Z,12Z,15Z))', 'PS(18:1(9Z)/18:2(9Z,12Z))', 'PS(18:2(9Z,12Z)/18:1(9Z))', 'PS(18:3(6Z,9Z,12Z)/18:0)', 'PS(18:3(9Z,12Z,15Z)/18:0)', 'PS(19:1(9Z)/17:2(9Z,12Z))', 'PS(20:2(11Z,14Z)/16:1(9Z))', 'PS(20:3(8Z,11Z,14Z)/16:0)', 'PS(22:2(13Z,16Z)/14…
806.497	57944.3	0.50033	0.000196225	C44H74NO10P	[M-H]-	806.498	-1.5	['PS(16:0/22:6(4Z,7Z,10Z,13Z,16Z,19Z))', 'PS(18:1(9Z)/20:5(5Z,8Z,11Z,14Z,17Z))', 'PS(18:2(9Z,12Z)/20:4(5Z,8Z,11Z,14Z))', 'PS(18:3(6Z,9Z,12Z)/20:3(8Z,11Z,14Z))', 'PS(18:3(9Z,12Z,15Z)/20:3(8Z,11Z,14Z))', 'PS(18:4(6Z,9Z,12Z,15Z)/20:2(11Z,14Z))', 'PS(20:2(11Z,14Z)/18:4(6Z,9Z,12Z,15Z))', 'PS(20:3(8Z,11Z,14Z)/18:3(6Z,9Z,12Z))', 'PS(20:3(8Z,11Z,14Z)/18:3(9Z,12Z,15Z))', 'PS(20:4(5Z,8Z,11Z,14Z)/18:2(9Z,12…
806.533	12905.9	0.096851	2.67e-10	C45H78NO9P	[M-H]-	806.534	-0.95	['PE(18:0/22:6(4Z,7Z,10Z,12E,16Z,19Z)(14OH))']
806.533	12905.9	0.096851	2.67e-10	C43H74NO7P	[M+Hac-H]-	806.534	-0.95	['PE(O-16:1(1Z)/22:6(4Z,7Z,10Z,13Z,16Z,19Z))']
806.594	13333	1.81533	0.0698778
807.441	45682.3	1.14164	0.724348
808.513	137717	0.692402	0.000519134	C42H72NO8P	[M+Hac-H]-	808.513	-0.54	['PC(12:0/22:6(4Z,7Z,10Z,13Z,16Z,19Z))', 'PC(14:1(9Z)/20:5(5Z,8Z,11Z,14Z,17Z))', 'PC(20:5(5Z,8Z,11Z,14Z,17Z)/14:1(9Z))', 'PC(22:6(4Z,7Z,10Z,13Z,16Z,19Z)/12:0)', 'PE(15:0/22:6(4Z,7Z,10Z,13Z,16Z,19Z))', 'PE(17:1(9Z)/20:5(5Z,8Z,11Z,14Z,17Z))', 'PE(17:2(9Z,12Z)/20:4(5Z,8Z,11Z,14Z))', 'PE(20:4(5Z,8Z,11Z,14Z)/17:2(9Z,12Z))', 'PE(20:5(5Z,8Z,11Z,14Z,17Z)/17:1(9Z))', 'PE(22:6(4Z,7Z,10Z,13Z,16Z,19Z)/15:0)']
808.513	137717	0.692402	0.000519134	C44H76NO10P	[M-H]-	808.513	-0.54	['PS(16:1(9Z)/22:4(7Z,10Z,13Z,16Z))', 'PS(18:0/20:5(5Z,8Z,11Z,14Z,17Z))', 'PS(18:1(9Z)/20:4(5Z,8Z,11Z,14Z))', 'PS(18:2(9Z,12Z)/20:3(8Z,11Z,14Z))', 'PS(18:3(6Z,9Z,12Z)/20:2(11Z,14Z))', 'PS(18:3(9Z,12Z,15Z)/20:2(11Z,14Z))', 'PS(18:4(6Z,9Z,12Z,15Z)/20:1(11Z))', 'PS(20:1(11Z)/18:4(6Z,9Z,12Z,15Z))', 'PS(20:2(11Z,14Z)/18:3(6Z,9Z,12Z))', 'PS(20:2(11Z,14Z)/18:3(9Z,12Z,15Z))', 'PS(20:3(8Z,11Z,14Z)/18:2(9Z…
808.549	15427	0.0810235	3.12e-10	C46H79NO8	[M+Cl]-	808.55	-0.74	['DGCC(16:0/20:5)']
808.549	15427	0.0810235	3.12e-10	C43H76NO7P	[M+Hac-H]-	808.55	-0.53	['PE(O-16:0/22:6(4Z,7Z,10Z,13Z,16Z,19Z))', 'PE(P-18:0/20:5(5Z,8Z,11Z,14Z,17Z))']
809.516	67381.2	0.686748	0.000291715
809.634	52802.6	1.15901	0.33527
810.529	155933	0.844281	0.013248	C46H79NO8	[M+K-2H]-	810.529	-0.18	['DGCC(16:0/20:5)']
810.529	155933	0.844281	0.013248	C42H74NO8P	[M+Hac-H]-	810.529	-0.04	['PC(14:0/20:5(5Z,8Z,11Z,14Z,17Z))', 'PC(14:1(9Z)/20:4(5Z,8Z,11Z,14Z))', 'PC(16:1(9Z)/18:4(6Z,9Z,12Z,15Z))', 'PC(18:4(6Z,9Z,12Z,15Z)/16:1(9Z))', 'PC(20:4(5Z,8Z,11Z,14Z)/14:1(9Z))', 'PC(20:5(5Z,8Z,11Z,14Z,17Z)/14:0)', 'PE(15:1(9Z)/22:4(7Z,10Z,13Z,16Z))', 'PE(17:0/20:5(5Z,8Z,11Z,14Z,17Z))', 'PE(17:1(9Z)/20:4(5Z,8Z,11Z,14Z))', 'PE(17:2(9Z,12Z)/20:3(8Z,11Z,14Z))', 'PE(18:4(6Z,9Z,12Z,15Z)/19:1(9Z))', …
810.529	155933	0.844281	0.013248	C44H78NO10P	[M-H]-	810.529	-0.04	['PS(16:0/22:4(7Z,10Z,13Z,16Z))', 'PS(18:0/20:4(5Z,8Z,11Z,14Z))', 'PS(18:1(9Z)/20:3(8Z,11Z,14Z))', 'PS(18:2(9Z,12Z)/20:2(11Z,14Z))', 'PS(18:3(6Z,9Z,12Z)/20:1(11Z))', 'PS(18:3(9Z,12Z,15Z)/20:1(11Z))', 'PS(18:4(6Z,9Z,12Z,15Z)/20:0)', 'PS(20:0/18:4(6Z,9Z,12Z,15Z))', 'PS(20:1(11Z)/18:3(6Z,9Z,12Z))', 'PS(20:1(11Z)/18:3(9Z,12Z,15Z))', 'PS(20:2(11Z,14Z)/18:2(9Z,12Z))', 'PS(20:3(8Z,11Z,14Z)/18:1(9Z))', '…
810.565	29476.3	0.0424052	8.27e-10	C43H78NO7P	[M+Hac-H]-	810.565	-0.55	['PE(O-16:0/22:5(4Z,7Z,10Z,13Z,16Z))', 'PE(O-16:0/22:5(7Z,10Z,13Z,16Z,19Z))', 'PE(O-18:0/20:5(5Z,8Z,11Z,14Z,17Z))', 'PE(O-18:1(1Z)/20:4(5Z,8Z,11Z,14Z))', 'PE(P-16:0/22:4(7Z,10Z,13Z,16Z))', 'PE(P-20:0/18:4(6Z,9Z,12Z,15Z))']
810.637	28614.1	1.10438	0.429252	C45H92NO7P	[M+Na-2H]-	810.636	1.21	['PC(O-16:0/21:0)', 'PC(O-17:0/20:0)', 'PC(O-18:0/19:0)', 'PC(O-20:0/17:0)', 'PE(O-18:0/22:0)', 'PE(O-20:0/20:0)']
810.637	28614.1	1.10438	0.429252	C47H90NO7P	[M-H]-	810.638	-1.76	['PE(P-20:0/22:2(13Z,16Z))']
811.532	78004.2	0.841507	0.00707171
811.569	14987.4	0.0833998	6.32e-11
812.545	419150	1.24299	0.00504407	C42H76NO8P	[M+Hac-H]-	812.545	-0.22	['PC(12:0/22:4(7Z,10Z,13Z,16Z))', 'PC(14:0/20:4(5Z,8Z,11Z,14Z))', 'PC(14:1(9Z)/20:3(8Z,11Z,14Z))', 'PC(16:0/18:4(6Z,9Z,12Z,15Z))', 'PC(16:0/18:4(9E,11E,13E,15E))', 'PC(16:0/18:4(9Z,11E,13E,15Z))', 'PC(16:0/18:4(9Z,11Z,13Z,15Z))', 'PC(16:1(9Z)/18:3(6Z,9Z,12Z))', 'PC(16:1(9Z)/18:3(9Z,12Z,15Z))', 'PC(16:2(2E,4E)/18:2(2E,4E))', 'PC(17:2(9Z,12Z)/17:2(9Z,12Z))', 'PC(18:3(6Z,9Z,12Z)/16:1(9Z))', 'PC(18:3…
812.545	419150	1.24299	0.00504407	C44H80NO10P	[M-H]-	812.545	-0.22	['PS(16:1(9Z)/22:2(13Z,16Z))', 'PS(18:0/20:3(8Z,11Z,14Z))', 'PS(18:1(9Z)/20:2(11Z,14Z))', 'PS(18:2(9Z,12Z)/20:1(11Z))', 'PS(18:3(6Z,9Z,12Z)/20:0)', 'PS(18:3(9Z,12Z,15Z)/20:0)', 'PS(20:0/18:3(6Z,9Z,12Z))', 'PS(20:0/18:3(9Z,12Z,15Z))', 'PS(20:1(11Z)/18:2(9Z,12Z))', 'PS(20:2(11Z,14Z)/18:1(9Z))', 'PS(20:3(8Z,11Z,14Z)/18:0)', 'PS(22:2(13Z,16Z)/16:1(9Z))']
813.548	200235	1.22966	0.00540757
813.664	43153.7	1.20704	0.170291
814.516	27380.2	1.15781	0.802536	C44H78NO8P	[M+Cl]-	814.516	-0.28	['PC(14:1(9Z)/22:4(7Z,10Z,13Z,16Z))', 'PC(16:0/20:5(5Z,8Z,11Z,14Z,17Z))', 'PC(16:1(7Z)/20:4(5Z,8Z,11Z,14Z))', 'PC(16:1(9Z)/20:4(5Z,8Z,11Z,14Z))', 'PC(18:1(9Z)/18:4(6Z,9Z,12Z,15Z))', 'PC(18:2(9Z,12Z)/18:3(6Z,9Z,12Z))', 'PC(18:2(9Z,12Z)/18:3(9Z,12Z,15Z))', 'PC(18:3(6Z,9Z,12Z)/18:2(9Z,12Z))', 'PC(18:3(9Z,12Z,15Z)/18:2(9Z,12Z))', 'PC(18:4(6Z,9Z,12Z,15Z)/18:1(9Z))', 'PC(20:4(5Z,8Z,11Z,14Z)/16:1(9Z))',…
814.516	27380.2	1.15781	0.802536	C45H80NO7P	[M+K-2H]-	814.516	-0.21	['PE(O-18:0/22:6(4Z,7Z,10Z,13Z,16Z,19Z))', 'PE(P-20:0/20:5(5Z,8Z,11Z,14Z,17Z))']
814.56	1.89436e+06	1.25666	0.00538829	C42H78NO8P	[M+Hac-H]-	814.56	-0.49	['PC(14:0/20:3(8Z,11Z,14Z))', 'PC(14:1(9Z)/20:2(11Z,14Z))', 'PC(16:0/18:3(6Z,9Z,12Z))', 'PC(16:0/18:3(9Z,12Z,15Z))', 'PC(16:1(9Z)/18:2(9Z,12Z))', 'PC(17:1(9Z)/17:2(9Z,12Z))', 'PC(17:2(9Z,12Z)/17:1(9Z))', 'PC(18:2(9Z,12Z)/16:1(9Z))', 'PC(18:3(6Z,9Z,12Z)/16:0)', 'PC(18:3(9Z,12Z,15Z)/16:0)', 'PC(20:2(11Z,14Z)/14:1(9Z))', 'PC(20:3(8Z,11Z,14Z)/14:0)', 'PE(15:1(9Z)/22:2(13Z,16Z))', 'PE(17:0/20:3(8Z,11Z…
814.56	1.89436e+06	1.25666	0.00538829	C44H82NO10P	[M-H]-	814.56	-0.49	['PS(16:0/22:2(13Z,16Z))', 'PS(16:1(9Z)/22:1(11Z))', 'PS(17:2(9Z,12Z)/21:0)', 'PS(18:0/20:2(11Z,14Z))', 'PS(18:1(9Z)/20:1(11Z))', 'PS(18:2(9Z,12Z)/20:0)', 'PS(19:1(9Z)/19:1(9Z))', 'PS(20:0/18:2(9Z,12Z))', 'PS(20:1(11Z)/18:1(9Z))', 'PS(20:2(11Z,14Z)/18:0)', 'PS(21:0/17:2(9Z,12Z))', 'PS(22:1(11Z)/16:1(9Z))', 'PS(22:2(13Z,16Z)/16:0)']
814.58	14299.2	1.22196	0.00371286
814.668	22965.1	1.18777	0.343483
815.564	907133	1.26621	0.00493665
815.628	76411	1.22192	0.0379772	C43H85N2O6P	[M+Hac-H]-	815.628	-0.39	['SM(d16:1/22:1)', 'SM(d18:1/20:1)', 'SM(d18:2/20:0)']
816.48	57821	0.503094	0.00233519	C43H74NO10P	[M+Na-2H]-	816.48	-0.15	['PS(15:1(9Z)/22:4(7Z,10Z,13Z,16Z))', 'PS(17:0/20:5(5Z,8Z,11Z,14Z,17Z))', 'PS(17:1(9Z)/20:4(5Z,8Z,11Z,14Z))', 'PS(17:2(9Z,12Z)/20:3(8Z,11Z,14Z))', 'PS(18:4(6Z,9Z,12Z,15Z)/19:1(9Z))', 'PS(19:1(9Z)/18:4(6Z,9Z,12Z,15Z))', 'PS(20:3(8Z,11Z,14Z)/17:2(9Z,12Z))', 'PS(20:4(5Z,8Z,11Z,14Z)/17:1(9Z))', 'PS(20:5(5Z,8Z,11Z,14Z,17Z)/17:0)', 'PS(22:4(7Z,10Z,13Z,16Z)/15:1(9Z))']
816.532	18030.7	0.498803	0.386375	C44H80NO8P	[M+Cl]-	816.532	-0.04	['PC(14:0/22:4(7Z,10Z,13Z,16Z))', 'PC(16:0/20:4(5E,8E,11E,14E))', 'PC(16:0/20:4(5Z,8Z,11Z,14Z))', 'PC(16:1(9Z)/20:3(8Z,11Z,14Z))', 'PC(18:0/18:4(6Z,9Z,12Z,15Z))', 'PC(18:0/18:4(9E,11E,13E,15E))', 'PC(18:1(9Z)/18:3(6Z,9Z,12Z))', 'PC(18:1(9Z)/18:3(9Z,12Z,15Z))', 'PC(18:2(2E,4E)/18:2(2E,4E))', 'PC(18:2(2Z,4Z)/18:2(2Z,4Z))', 'PC(18:2(6Z,9Z)/18:2(6Z,9Z))', 'PC(18:2(9Z,11Z)/18:2(9Z,11Z))', 'PC(18:2(9Z,…
816.532	18030.7	0.498803	0.386375	C45H82NO7P	[M+K-2H]-	816.531	0.04	['PE(O-20:0/20:5(5Z,8Z,11Z,14Z,17Z))', 'PE(P-18:0/22:4(7Z,10Z,13Z,16Z))', 'PE(P-20:0/20:4(5Z,8Z,11Z,14Z))']
816.549	14235.5	1.39646	0.00345515	C45H82NO7P	[M+(37Cl)]-	816.549	-0.98	['PE(O-20:0/20:5(5Z,8Z,11Z,14Z,17Z))', 'PE(P-18:0/22:4(7Z,10Z,13Z,16Z))', 'PE(P-20:0/20:4(5Z,8Z,11Z,14Z))']
816.56	73697.1	1.22495	0.0707576
816.576	1.0394e+06	1.26205	0.00447125	C42H80NO8P	[M+Hac-H]-	816.576	0.31	['PC(12:0/22:2(13Z,16Z))', 'PC(14:0/20:2(11Z,14Z))', 'PC(14:1(9Z)/20:1(11Z))', 'PC(15:1(9Z)/19:1(9Z))', 'PC(16:0/18:2(10E,12Z))', 'PC(16:0/18:2(11Z,13Z))', 'PC(16:0/18:2(2E,4E))', 'PC(16:0/18:2(2Z,4Z))', 'PC(16:0/18:2(6Z,9Z))', 'PC(16:0/18:2(9E,11E))', 'PC(16:0/18:2(9E,11Z))', 'PC(16:0/18:2(9E,12E))', 'PC(16:0/18:2(9Z,12Z))', 'PC(16:1(2Z)/18:1(9Z))', 'PC(16:1(9Z)/18:1(11Z))', 'PC(16:1(9Z)/18:1(9Z…
816.576	1.0394e+06	1.26205	0.00447125	C44H84NO10P	[M-H]-	816.576	0.31	['PS(16:0/22:1(11Z))', 'PS(16:1(9Z)/22:0)', 'PS(17:1(9Z)/21:0)', 'PS(18:0/20:1(11Z))', 'PS(18:1(9Z)/20:0)', 'PS(19:0/19:1(9Z))', 'PS(19:1(9Z)/19:0)', 'PS(20:0/18:1(9Z))', 'PS(20:1(11Z)/18:0)', 'PS(21:0/17:1(9Z))', 'PS(22:0/16:1(9Z))', 'PS(22:1(11Z)/16:0)']
816.595	6689.08	0.797611	0.447443
816.631	35363.8	1.28608	0.00348457
817.483	26886.8	0.398343	0.00136865	C40H77O13P	[M+Na-2H]-	817.485	-1.74	['PI(12:0/19:0)', 'PI(13:0/18:0)', 'PI(14:0/17:0)', 'PI(15:0/16:0)', 'PI(16:0/15:0)', 'PI(17:0/14:0)', 'PI(18:0/13:0)', 'PI(19:0/12:0)']
817.561	13595.6	1.33523	0.0185876	C45H82O10	[M+Cl]-	817.56	0.45	['MGDG(18:0(9Z)/18:2(9Z,12Z))', 'MGDG(18:1(9Z)/18:1(9Z))']
817.561	13595.6	1.33523	0.0185876	C42H79O9P	[M+Hac-H]-	817.56	0.66	['PG(O-16:0/20:3(8Z,11Z,14Z))', 'PG(O-18:0/18:3(6Z,9Z,12Z))', 'PG(O-18:0/18:3(9Z,12Z,15Z))', 'PG(P-16:0/20:2(11Z,14Z))', 'PG(P-18:0/18:2(9Z,12Z))']
817.579	549139	1.27572	0.00289756
817.644	241887	1.36269	0.00434146	C43H87N2O6P	[M+Hac-H]-	817.644	-0.39	['SM(d16:1/22:0)', 'SM(d18:1/20:0)']
818.496	80267.1	0.46527	0.00130133	C43H70NO8P	[M+Hac-H]-	818.498	-1.91	['PE(18:3(6Z,9Z,12Z)/20:5(5Z,8Z,11Z,14Z,17Z))', 'PE(18:3(9Z,12Z,15Z)/20:5(5Z,8Z,11Z,14Z,17Z))', 'PE(18:4(6Z,9Z,12Z,15Z)/20:4(5Z,8Z,11Z,14Z))', 'PE(20:4(5Z,8Z,11Z,14Z)/18:4(6Z,9Z,12Z,15Z))', 'PE(20:5(5Z,8Z,11Z,14Z,17Z)/18:3(6Z,9Z,12Z))', 'PE(20:5(5Z,8Z,11Z,14Z,17Z)/18:3(9Z,12Z,15Z))']
818.496	80267.1	0.46527	0.00130133	C43H76NO10P	[M+Na-2H]-	818.495	1.03	['PS(15:0/22:4(7Z,10Z,13Z,16Z))', 'PS(17:0/20:4(5Z,8Z,11Z,14Z))', 'PS(17:1(9Z)/20:3(8Z,11Z,14Z))', 'PS(17:2(9Z,12Z)/20:2(11Z,14Z))', 'PS(18:3(6Z,9Z,12Z)/19:1(9Z))', 'PS(18:3(9Z,12Z,15Z)/19:1(9Z))', 'PS(18:4(6Z,9Z,12Z,15Z)/19:0)', 'PS(19:0/18:4(6Z,9Z,12Z,15Z))', 'PS(19:1(9Z)/18:3(6Z,9Z,12Z))', 'PS(19:1(9Z)/18:3(9Z,12Z,15Z))', 'PS(20:2(11Z,14Z)/17:2(9Z,12Z))', 'PS(20:3(8Z,11Z,14Z)/17:1(9Z))', 'PS(2…
818.496	80267.1	0.46527	0.00130133	C45H74NO10P	[M-H]-	818.498	-1.91	['PS(17:1(9Z)/22:6(4Z,7Z,10Z,13Z,16Z,19Z))', 'PS(22:6(4Z,7Z,10Z,13Z,16Z,19Z)/17:1(9Z))']
818.574	33755.2	1.3552	0.00651691
818.592	934032	1.36379	0.00275749	C46H87NO8	[M+K-2H]-	818.592	0.12	['GalCer(d18:2/22:0)', 'GlcCer(d18:2/22:0)']
818.592	934032	1.36379	0.00275749	C42H82NO8P	[M+Hac-H]-	818.592	0.26	['PC(12:0/22:1(11Z))', 'PC(14:0/20:1(11Z))', 'PC(14:1(9Z)/20:0)', 'PC(15:0/19:1(9Z))', 'PC(15:1(9Z)/19:0)', 'PC(16:0/18:1(11E))', 'PC(16:0/18:1(11Z))', 'PC(16:0/18:1(6E))', 'PC(16:0/18:1(6Z))', 'PC(16:0/18:1(9E))', 'PC(16:0/18:1(9Z))', 'PC(16:1(9Z)/18:0)', 'PC(17:0/17:1(9Z))', 'PC(17:1(9Z)/17:0)', 'PC(18:0/16:1(9Z))', 'PC(18:1(9Z)/16:0)', 'PC(19:0/15:1(9Z))', 'PC(19:1(9Z)/15:0)', 'PC(20:0/14:1(9Z…
818.592	934032	1.36379	0.00275749	C44H86NO10P	[M-H]-	818.592	0.26	['PS(16:0/22:0)', 'PS(17:0/21:0)', 'PS(18:0/20:0)', 'PS(19:0/19:0)', 'PS(20:0/18:0)', 'PS(21:0/17:0)', 'PS(22:0/16:0)']
818.61	8974.31	1.3272	0.0116637	C46H87NO8	[M+(37Cl)]-	818.61	0.93	['GalCer(d18:2/22:0)', 'GlcCer(d18:2/22:0)']
818.647	121830	1.35722	0.00540612
819.499	36914.7	0.387918	0.00109471
819.595	486765	1.35001	0.0022156	C45H87N2O6P	[M+(37Cl)]-	819.597	-1.89	['SM(d18:2/22:1)']
819.792	22306.6	0.956376	0.891708
820.511	141617	0.548523	0.00136865	C43H78NO10P	[M+Na-2H]-	820.511	-0.1	['PS(15:1(9Z)/22:2(13Z,16Z))', 'PS(17:0/20:3(8Z,11Z,14Z))', 'PS(17:1(9Z)/20:2(11Z,14Z))', 'PS(17:2(9Z,12Z)/20:1(11Z))', 'PS(18:2(9Z,12Z)/19:1(9Z))', 'PS(18:3(6Z,9Z,12Z)/19:0)', 'PS(18:3(9Z,12Z,15Z)/19:0)', 'PS(19:0/18:3(6Z,9Z,12Z))', 'PS(19:0/18:3(9Z,12Z,15Z))', 'PS(19:1(9Z)/18:2(9Z,12Z))', 'PS(20:1(11Z)/17:2(9Z,12Z))', 'PS(20:2(11Z,14Z)/17:1(9Z))', 'PS(20:3(8Z,11Z,14Z)/17:0)', 'PS(22:2(13Z,16Z)/…
820.595	85785.1	1.32623	0.00318143
820.611	25340.8	1.35223	0.0790465
821.612	25307.9	1.43465	0.0109509	C45H89N2O6P	[M+(37Cl)]-	821.612	-0.33	['SM(d16:1/24:1)', 'SM(d18:1/22:1(13Z))', 'SM(d18:2/22:0)']
821.67	85987.2	1.22915	0.221257
822.528	188791	0.942415	0.480523	C43H74NO8P	[M+Hac-H]-	822.529	-1.03	['PC(13:0/22:6(4Z,7Z,10Z,13Z,16Z,19Z))', 'PC(15:1(9Z)/20:5(5Z,8Z,11Z,14Z,17Z))', 'PC(17:2(9Z,12Z)/18:4(6Z,9Z,12Z,15Z))', 'PC(18:4(6Z,9Z,12Z,15Z)/17:2(9Z,12Z))', 'PC(20:5(5Z,8Z,11Z,14Z,17Z)/15:1(9Z))', 'PC(22:6(4Z,7Z,10Z,13Z,16Z,19Z)/13:0)', 'PE(16:0/22:6(4Z,7Z,10Z,13Z,16Z,19Z))', 'PE(18:1(9Z)/20:5(5Z,8Z,11Z,14Z,17Z))', 'PE(18:2(9Z,12Z)/20:4(5Z,8Z,11Z,14Z))', 'PE(18:3(6Z,9Z,12Z)/20:3(8Z,11Z,14Z))'…
822.528	188791	0.942415	0.480523	C43H80NO10P	[M+Na-2H]-	822.527	1.89	['PS(15:0/22:2(13Z,16Z))', 'PS(15:1(9Z)/22:1(11Z))', 'PS(17:0/20:2(11Z,14Z))', 'PS(17:1(9Z)/20:1(11Z))', 'PS(17:2(9Z,12Z)/20:0)', 'PS(18:1(9Z)/19:1(9Z))', 'PS(18:2(9Z,12Z)/19:0)', 'PS(19:0/18:2(9Z,12Z))', 'PS(19:1(9Z)/18:1(9Z))', 'PS(20:0/17:2(9Z,12Z))', 'PS(20:1(11Z)/17:1(9Z))', 'PS(20:2(11Z,14Z)/17:0)', 'PS(22:1(11Z)/15:1(9Z))', 'PS(22:2(13Z,16Z)/15:0)']
822.528	188791	0.942415	0.480523	C45H78NO10P	[M-H]-	822.529	-1.03	['PS(17:1(9Z)/22:4(7Z,10Z,13Z,16Z))', 'PS(19:0/20:5(5Z,8Z,11Z,14Z,17Z))', 'PS(19:1(9Z)/20:4(5Z,8Z,11Z,14Z))', 'PS(20:4(5Z,8Z,11Z,14Z)/19:1(9Z))', 'PS(20:5(5Z,8Z,11Z,14Z,17Z)/19:0)', 'PS(22:4(7Z,10Z,13Z,16Z)/17:1(9Z))']
822.673	48800.5	1.30405	0.118021
823.533	52116.2	1.42107	0.364944	C42H81O13P	[M-H]-	823.534	-1.19	['PI(12:0/21:0)', 'PI(13:0/20:0)', 'PI(14:0/19:0)', 'PI(15:0/18:0)', 'PI(16:0/17:0)', 'PI(17:0/16:0)', 'PI(18:0/15:0)', 'PI(19:0/14:0)', 'PI(20:0/13:0)', 'PI(21:0/12:0)']
823.562	122860	0.804937	0.69294	C45H87O8P	[M+K-2H]-	823.562	-0.94	['PA(20:0/22:1(11Z))', 'PA(20:1(11Z)/22:0)', 'PA(22:0/20:1(11Z))', 'PA(22:1(11Z)/20:0)']
823.562	122860	0.804937	0.69294	C44H85O9P	[M+Cl]-	823.563	-1.01	['PG(O-16:0/22:2(13Z,16Z))', 'PG(O-18:0/20:2(11Z,14Z))', 'PG(O-20:0/18:2(9Z,12Z))', 'PG(P-16:0/22:1(11Z))', 'PG(P-18:0/20:1(11Z))', 'PG(P-20:0/18:1(9Z))']
824.509	9437.04	7.66106	0.000149493	C42H72NO9P	[M+Hac-H]-	824.508	0.78	['PS(P-16:0/20:5(5Z,8Z,11Z,14Z,17Z))']
824.545	214870	1.12536	0.241688	C43H76NO8P	[M+Hac-H]-	824.545	-0.16	['PC(15:0/20:5(5Z,8Z,11Z,14Z,17Z))', 'PC(15:1(9Z)/20:4(5Z,8Z,11Z,14Z))', 'PC(17:1(9Z)/18:4(6Z,9Z,12Z,15Z))', 'PC(17:2(9Z,12Z)/18:3(6Z,9Z,12Z))', 'PC(17:2(9Z,12Z)/18:3(9Z,12Z,15Z))', 'PC(18:3(6Z,9Z,12Z)/17:2(9Z,12Z))', 'PC(18:3(9Z,12Z,15Z)/17:2(9Z,12Z))', 'PC(18:4(6Z,9Z,12Z,15Z)/17:1(9Z))', 'PC(20:4(5Z,8Z,11Z,14Z)/15:1(9Z))', 'PC(20:5(5Z,8Z,11Z,14Z,17Z)/15:0)', 'PE(16:1(9Z)/22:4(7Z,10Z,13Z,16Z))',…
824.545	214870	1.12536	0.241688	C45H80NO10P	[M-H]-	824.545	-0.16	['PS(17:0/22:4(7Z,10Z,13Z,16Z))', 'PS(17:2(9Z,12Z)/22:2(13Z,16Z))', 'PS(18:4(6Z,9Z,12Z,15Z)/21:0)', 'PS(19:0/20:4(5Z,8Z,11Z,14Z))', 'PS(19:1(9Z)/20:3(8Z,11Z,14Z))', 'PS(20:3(8Z,11Z,14Z)/19:1(9Z))', 'PS(20:4(5Z,8Z,11Z,14Z)/19:0)', 'PS(21:0/18:4(6Z,9Z,12Z,15Z))', 'PS(22:2(13Z,16Z)/17:2(9Z,12Z))', 'PS(22:4(7Z,10Z,13Z,16Z)/17:0)']
824.565	56593.6	1.03574	0.95368
826.56	304253	1.23211	0.0666187	C43H78NO8P	[M+Hac-H]-	826.56	-0.29	['PC(13:0/22:4(7Z,10Z,13Z,16Z))', 'PC(15:0/20:4(5Z,8Z,11Z,14Z))', 'PC(15:1(9Z)/20:3(8Z,11Z,14Z))', 'PC(17:0/18:4(6Z,9Z,12Z,15Z))', 'PC(17:1(9Z)/18:3(6Z,9Z,12Z))', 'PC(17:1(9Z)/18:3(9Z,12Z,15Z))', 'PC(17:2(9Z,12Z)/18:2(9Z,12Z))', 'PC(18:2(9Z,12E)/17:2(9Z,11E))', 'PC(18:2(9Z,12Z)/17:2(9Z,12Z))', 'PC(18:3(6Z,9Z,12Z)/17:1(9Z))', 'PC(18:3(9Z,12Z,15Z)/17:1(9Z))', 'PC(18:4(6Z,9Z,12Z,15Z)/17:0)', 'PC(20:…
826.56	304253	1.23211	0.0666187	C45H82NO10P	[M-H]-	826.56	-0.29	['PS(17:1(9Z)/22:2(13Z,16Z))', 'PS(17:2(9Z,12Z)/22:1(11Z))', 'PS(18:3(6Z,9Z,12Z)/21:0)', 'PS(18:3(9Z,12Z,15Z)/21:0)', 'PS(19:0/20:3(8Z,11Z,14Z))', 'PS(19:1(9Z)/20:2(11Z,14Z))', 'PS(20:2(11Z,14Z)/19:1(9Z))', 'PS(20:3(8Z,11Z,14Z)/19:0)', 'PS(21:0/18:3(6Z,9Z,12Z))', 'PS(21:0/18:3(9Z,12Z,15Z))', 'PS(22:1(11Z)/17:2(9Z,12Z))', 'PS(22:2(13Z,16Z)/17:1(9Z))']
827.471	10904.7	0.280018	4.34e-05	C43H73O13P	[M-H]-	827.472	-0.68	['PI(14:0/20:5(5Z,8Z,11Z,14Z,17Z))', 'PI(14:1(9Z)/20:4(5Z,8Z,11Z,14Z))', 'PI(16:1(9Z)/18:4(6Z,9Z,12Z,15Z))', 'PI(18:4(6Z,9Z,12Z,15Z)/16:1(9Z))', 'PI(20:4(5Z,8Z,11Z,14Z)/14:1(9Z))', 'PI(20:5(5Z,8Z,11Z,14Z,17Z)/14:0)']
827.565	116491	1.25226	0.0225144
828.54	15755.6	12.605	2.37e-07	C42H76NO9P	[M+Hac-H]-	828.54	0.77	['PS(O-16:0/20:4(5Z,8Z,11Z,14Z))', 'PS(O-18:0/18:4(6Z,9Z,12Z,15Z))', 'PS(P-16:0/20:3(8Z,11Z,14Z))', 'PS(P-18:0/18:3(6Z,9Z,12Z))', 'PS(P-18:0/18:3(9Z,12Z,15Z))']
828.576	261270	1.28398	0.0143703	C43H80NO8P	[M+Hac-H]-	828.576	0.31	['PC(15:0/20:3(8Z,11Z,14Z))', 'PC(15:1(9Z)/20:2(11Z,14Z))', 'PC(17:0/18:3(6Z,9Z,12Z))', 'PC(17:0/18:3(9Z,12Z,15Z))', 'PC(17:1(9Z)/18:2(9Z,12Z))', 'PC(17:2(9Z,12Z)/18:1(9Z))', 'PC(18:1(9Z)/17:2(9Z,12Z))', 'PC(18:2(9Z,12Z)/17:1(9Z))', 'PC(18:3(6Z,9Z,12Z)/17:0)', 'PC(18:3(9Z,12Z,15Z)/17:0)', 'PC(20:2(11Z,14Z)/15:1(9Z))', 'PC(20:3(8Z,11Z,14Z)/15:0)', 'PE(16:1(9Z)/22:2(13Z,16Z))', 'PE(18:0/20:3(8Z,11Z…
828.576	261270	1.28398	0.0143703	C45H84NO10P	[M-H]-	828.576	0.31	['PS(17:0/22:2(13Z,16Z))', 'PS(17:1(9Z)/22:1(11Z))', 'PS(17:2(9Z,12Z)/22:0)', 'PS(18:2(9Z,12Z)/21:0)', 'PS(19:0/20:2(11Z,14Z))', 'PS(19:1(9Z)/20:1(11Z))', 'PS(20:1(11Z)/19:1(9Z))', 'PS(20:2(11Z,14Z)/19:0)', 'PS(21:0/18:2(9Z,12Z))', 'PS(22:0/17:2(9Z,12Z))', 'PS(22:1(11Z)/17:1(9Z))', 'PS(22:2(13Z,16Z)/17:0)']
829.254	32984.7	0.353352	0.0965479	C38H48O19	[M+Na-2H]-	829.254	0.68	['8-Prenylkaempferol 3-rhamnosyl-(1->3)-[apiosyl-(1->6)-glucoside]', 'Diphylloside B', 'Epimedin B']
829.487	98293	0.725967	0.0125396	C43H75O13P	[M-H]-	829.487	-0.29	['PI(12:0/22:4(7Z,10Z,13Z,16Z))', 'PI(14:0/20:4(5Z,8Z,11Z,14Z))', 'PI(14:1(9Z)/20:3(8Z,11Z,14Z))', 'PI(16:0/18:4(6Z,9Z,12Z,15Z))', 'PI(16:1(9Z)/18:3(6Z,9Z,12Z))', 'PI(16:1(9Z)/18:3(9Z,12Z,15Z))', 'PI(17:2(9Z,12Z)/17:2(9Z,12Z))', 'PI(18:3(6Z,9Z,12Z)/16:1(9Z))', 'PI(18:3(9Z,12Z,15Z)/16:1(9Z))', 'PI(18:4(6Z,9Z,12Z,15Z)/16:0)', 'PI(20:3(8Z,11Z,14Z)/14:1(9Z))', 'PI(20:4(5Z,8Z,11Z,14Z)/14:0)', 'PI(22:4…
829.564	8064.1	1.01796	0.95278
829.581	111325	1.28307	0.00753776
829.644	19319.5	1.12681	0.653968	C44H87N2O6P	[M+Hac-H]-	829.644	-0.6	['SM(d18:2/21:0)']
830.555	23636.7	8.8667	1.12e-07	C42H78NO9P	[M+Hac-H]-	830.555	0.23	['PS(O-16:0/20:3(8Z,11Z,14Z))', 'PS(O-18:0/18:3(6Z,9Z,12Z))', 'PS(O-18:0/18:3(9Z,12Z,15Z))', 'PS(P-16:0/20:2(11Z,14Z))', 'PS(P-18:0/18:2(9Z,12Z))']
830.592	106213	1.2558	0.0141696	C43H82NO8P	[M+Hac-H]-	830.592	0.82	['PC(13:0/22:2(13Z,16Z))', 'PC(15:0/20:2(11Z,14Z))', 'PC(15:1(9Z)/20:1(11Z))', 'PC(16:1(9Z)/19:1(9Z))', 'PC(17:0/18:2(9Z,12Z))', 'PC(17:1(9Z)/18:1(9Z))', 'PC(17:2(9Z,12Z)/18:0)', 'PC(18:0/17:2(9Z,12Z))', 'PC(18:1(9Z)/17:1(9Z))', 'PC(18:2(9Z,12Z)/17:0)', 'PC(19:1(9Z)/16:1(9Z))', 'PC(20:1(11Z)/15:1(9Z))', 'PC(20:2(11Z,14Z)/15:0)', 'PC(22:2(13Z,16Z)/13:0)', 'PE(16:0/22:2(13Z,16Z))', 'PE(16:1(9Z)/22:…
830.592	106213	1.2558	0.0141696	C45H86NO10P	[M-H]-	830.592	0.82	['PS(17:0/22:1(11Z))', 'PS(17:1(9Z)/22:0)', 'PS(18:1(9Z)/21:0)', 'PS(19:0/20:1(11Z))', 'PS(19:1(9Z)/20:0)', 'PS(20:0/19:1(9Z))', 'PS(20:1(11Z)/19:0)', 'PS(21:0/18:1(9Z))', 'PS(22:0/17:1(9Z))', 'PS(22:1(11Z)/17:0)']
831.415	14865.4	12.0039	0.000103427
831.503	362208	0.759781	0.0378678	C43H77O13P	[M-H]-	831.503	-0.44	['PI(14:0/20:3(8Z,11Z,14Z))', 'PI(14:1(9Z)/20:2(11Z,14Z))', 'PI(16:0/18:3(6Z,9Z,12Z))', 'PI(16:0/18:3(9Z,12Z,15Z))', 'PI(16:1(9Z)/18:2(9Z,12Z))', 'PI(17:1(9Z)/17:2(9Z,12Z))', 'PI(17:2(9Z,12Z)/17:1(9Z))', 'PI(18:2(9Z,12Z)/16:1(9Z))', 'PI(18:3(6Z,9Z,12Z)/16:0)', 'PI(18:3(9Z,12Z,15Z)/16:0)', 'PI(20:2(11Z,14Z)/14:1(9Z))', 'PI(20:3(8Z,11Z,14Z)/14:0)']
831.596	53623.6	1.28102	0.00201933
831.659	54652.6	1.47065	0.00101341	C44H89N2O6P	[M+Hac-H]-	831.66	-0.28	['SM(d16:1/23:0)', 'SM(d17:1/22:0)', 'SM(d18:1/21:0)', 'SM(d19:1/20:0)', 'SM(d20:1/19:0)']
832.506	158204	0.677528	0.00828109
832.663	24983.9	1.49449	0.00874158	C48H93NO8	[M+Na-2H]-	832.665	-1.59	['GalCer(d18:1/24:0)', 'GlcCer(d18:0/24:1(15Z))', 'Glucosylceramide (d18:1/24:0)']
833.502	12389.3	0.519933	0.00354676
833.52	120912	0.85229	0.200877	C43H79O13P	[M-H]-	833.519	1.26	['PI(12:0/22:2(13Z,16Z))', 'PI(14:0/20:2(11Z,14Z))', 'PI(14:1(9Z)/20:1(11Z))', 'PI(15:1(9Z)/19:1(9Z))', 'PI(16:0/18:2(9Z,12Z))', 'PI(16:1(9Z)/18:1(9Z))', 'PI(17:0/17:2(9Z,12Z))', 'PI(17:1(9Z)/17:1(9Z))', 'PI(17:2(9Z,12Z)/17:0)', 'PI(18:1(9Z)/16:1(9Z))', 'PI(18:2(9Z,12Z)/16:0)', 'PI(19:1(9Z)/15:1(9Z))', 'PI(20:1(11Z)/14:1(9Z))', 'PI(20:2(11Z,14Z)/14:0)', 'PI(22:2(13Z,16Z)/12:0)']
834.522	40494.2	0.294573	0.000614842
835.649	37904.9	1.19503	0.210383
836.516	12508.3	1.41024	0.00045768
836.544	1.26956e+06	1.16046	0.0807957	C44H76NO8P	[M+Hac-H]-	836.545	-0.53	['PC(14:0/22:6(4Z,7Z,10Z,13Z,16Z,19Z))', 'PC(16:1(9Z)/20:5(5Z,8Z,11Z,14Z,17Z))', 'PC(18:2(9Z,12Z)/18:4(6Z,9Z,12Z,15Z))', 'PC(18:3(6Z,9Z,12Z)/18:3(6Z,9Z,12Z))', 'PC(18:3(6Z,9Z,12Z)/18:3(9Z,12Z,15Z))', 'PC(18:3(9E,11E,13E)/18:3(9E,11E,13E))', 'PC(18:3(9Z,11E,13E)/18:3(9Z,11E,13E))', 'PC(18:3(9Z,12Z,15Z)/18:3(6Z,9Z,12Z))', 'PC(18:3(9Z,12Z,15Z)/18:3(9Z,12Z,15Z))', 'PC(18:4(6Z,9Z,12Z,15Z)/18:2(9Z,12Z)…
836.544	1.26956e+06	1.16046	0.0807957	C46H80NO10P	[M-H]-	836.545	-0.53	['PS(18:1(9Z)/22:4(7Z,10Z,13Z,16Z))', 'PS(18:3(6Z,9Z,12Z)/22:2(13Z,16Z))', 'PS(18:3(9Z,12Z,15Z)/22:2(13Z,16Z))', 'PS(18:4(6Z,9Z,12Z,15Z)/22:1(11Z))', 'PS(20:0/20:5(5Z,8Z,11Z,14Z,17Z))', 'PS(20:1(11Z)/20:4(5Z,8Z,11Z,14Z))', 'PS(20:2(11Z,14Z)/20:3(8Z,11Z,14Z))', 'PS(20:3(8Z,11Z,14Z)/20:2(11Z,14Z))', 'PS(20:4(5Z,8Z,11Z,14Z)/20:1(11Z))', 'PS(20:5(5Z,8Z,11Z,14Z,17Z)/20:0)', 'PS(22:1(11Z)/18:4(6Z,9Z,12…
836.652	20869.6	0.969705	0.891708	C47H94NO7P	[M+Na-2H]-	836.651	0.63	['PC(O-20:0/19:1(9Z))', 'PC(P-18:0/21:0)', 'PC(P-20:0/19:0)', 'PE(O-20:0/22:1(11Z))', 'PE(P-20:0/22:0)']
837.548	642146	1.16745	0.0705909
837.665	97063.9	1.19204	0.275472
838.532	19792.1	1.07575	0.824973
838.541	37071.9	0.996053	0.968593	C49H78NO8P	[M-H]-	838.539	1.73	['PE(22:4(7Z,10Z,13Z,16Z)/22:6(4Z,7Z,10Z,13Z,16Z,19Z))', 'PE(22:6(4Z,7Z,10Z,13Z,16Z,19Z)/22:4(7Z,10Z,13Z,16Z))']
838.56	1.85478e+06	1.15807	0.0663745	C44H78NO8P	[M+Hac-H]-	838.56	-0.22	['PC(14:1(9Z)/22:4(7Z,10Z,13Z,16Z))', 'PC(16:0/20:5(5Z,8Z,11Z,14Z,17Z))', 'PC(16:1(7Z)/20:4(5Z,8Z,11Z,14Z))', 'PC(16:1(9Z)/20:4(5Z,8Z,11Z,14Z))', 'PC(18:1(9Z)/18:4(6Z,9Z,12Z,15Z))', 'PC(18:2(9Z,12Z)/18:3(6Z,9Z,12Z))', 'PC(18:2(9Z,12Z)/18:3(9Z,12Z,15Z))', 'PC(18:3(6Z,9Z,12Z)/18:2(9Z,12Z))', 'PC(18:3(9Z,12Z,15Z)/18:2(9Z,12Z))', 'PC(18:4(6Z,9Z,12Z,15Z)/18:1(9Z))', 'PC(20:4(5Z,8Z,11Z,14Z)/16:1(9Z))',…
838.56	1.85478e+06	1.15807	0.0663745	C46H82NO10P	[M-H]-	838.56	-0.22	['PS(18:0/22:4(7Z,10Z,13Z,16Z))', 'PS(18:2(9Z,12Z)/22:2(13Z,16Z))', 'PS(18:3(6Z,9Z,12Z)/22:1(11Z))', 'PS(18:3(9Z,12Z,15Z)/22:1(11Z))', 'PS(18:4(6Z,9Z,12Z,15Z)/22:0)', 'PS(20:0/20:4(5Z,8Z,11Z,14Z))', 'PS(20:1(11Z)/20:3(8Z,11Z,14Z))', 'PS(20:2(11Z,14Z)/20:2(11Z,14Z))', 'PS(20:3(8Z,11Z,14Z)/20:1(11Z))', 'PS(20:4(5Z,8Z,11Z,14Z)/20:0)', 'PS(22:0/18:4(6Z,9Z,12Z,15Z))', 'PS(22:1(11Z)/18:3(6Z,9Z,12Z))', …
838.668	55992	1.16483	0.331107	C47H96NO7P	[M+Na-2H]-	838.667	0.73	['PC(O-17:0/22:0)', 'PC(O-18:0/21:0)', 'PC(O-20:0/19:0)', 'PE(O-20:0/22:0)']
839.544	16359.4	1.15847	0.086988	C44H77O9P	[M+Hac-H]-	839.544	-0.88	['PG(O-16:0/22:6(4Z,7Z,10Z,13Z,16Z,19Z))', 'PG(P-18:0/20:5(5Z,8Z,11Z,14Z,17Z))']
839.563	960348	1.15831	0.0677668
839.682	14331.1	1.26613	0.449392
840.538	3425.15	0.364933	8.14e-06
840.576	2.09493e+06	1.20866	0.0184768	C44H80NO8P	[M+Hac-H]-	840.576	-0.45	['PC(14:0/22:4(7Z,10Z,13Z,16Z))', 'PC(16:0/20:4(5E,8E,11E,14E))', 'PC(16:0/20:4(5Z,8Z,11Z,14Z))', 'PC(16:1(9Z)/20:3(8Z,11Z,14Z))', 'PC(18:0/18:4(6Z,9Z,12Z,15Z))', 'PC(18:0/18:4(9E,11E,13E,15E))', 'PC(18:1(9Z)/18:3(6Z,9Z,12Z))', 'PC(18:1(9Z)/18:3(9Z,12Z,15Z))', 'PC(18:2(2E,4E)/18:2(2E,4E))', 'PC(18:2(2Z,4Z)/18:2(2Z,4Z))', 'PC(18:2(6Z,9Z)/18:2(6Z,9Z))', 'PC(18:2(9Z,11Z)/18:2(9Z,11Z))', 'PC(18:2(9Z,…
840.576	2.09493e+06	1.20866	0.0184768	C46H84NO10P	[M-H]-	840.576	-0.45	['PS(18:1(9Z)/22:2(13Z,16Z))', 'PS(18:2(9Z,12Z)/22:1(11Z))', 'PS(18:3(6Z,9Z,12Z)/22:0)', 'PS(18:3(9Z,12Z,15Z)/22:0)', 'PS(20:0/20:3(8Z,11Z,14Z))', 'PS(20:1(11Z)/20:2(11Z,14Z))', 'PS(20:2(11Z,14Z)/20:1(11Z))', 'PS(20:3(8Z,11Z,14Z)/20:0)', 'PS(22:0/18:3(6Z,9Z,12Z))', 'PS(22:0/18:3(9Z,12Z,15Z))', 'PS(22:1(11Z)/18:2(9Z,12Z))', 'PS(22:2(13Z,16Z)/18:1(9Z))']
840.596	18555.4	1.19264	0.00379528
840.605	6738.28	1.19044	0.350161	C48H88NO6P	[M+Cl]-	840.604	0.37	['NA']
841.579	1.12548e+06	1.19978	0.0209195
841.599	9569.48	1.1717	0.00990959
842.592	1.12538e+06	1.22993	0.0116637	C44H82NO8P	[M+Hac-H]-	842.592	0.63	['PC(14:1(9Z)/22:2(13Z,16Z))', 'PC(16:0/20:3(5Z,8Z,11Z))', 'PC(16:0/20:3(8E,11E,14E))', 'PC(16:0/20:3(8Z,11Z,14Z))', 'PC(16:1(9Z)/20:2(11Z,14Z))', 'PC(17:2(9Z,12Z)/19:1(9Z))', 'PC(18:0/18:3(6Z,9Z,12Z))', 'PC(18:0/18:3(9Z,12Z,15Z))', 'PC(18:1(9Z)/18:2(6Z,9Z))', 'PC(18:1(9Z)/18:2(9Z,12Z))', 'PC(18:2(9Z,12Z)/18:1(9Z))', 'PC(18:3(6Z,9Z,12Z)/18:0)', 'PC(18:3(9Z,12Z,15Z)/18:0)', 'PC(19:1(9Z)/17:2(9Z,12…
842.592	1.12538e+06	1.22993	0.0116637	C46H86NO10P	[M-H]-	842.592	0.63	['PS(18:0/22:2(13Z,16Z))', 'PS(18:1(9Z)/22:1(11Z))', 'PS(18:2(9Z,12Z)/22:0)', 'PS(20:0/20:2(11Z,14Z))', 'PS(20:1(11Z)/20:1(11Z))', 'PS(20:2(11Z,14Z)/20:0)', 'PS(22:0/18:2(9Z,12Z))', 'PS(22:1(11Z)/18:1(9Z))', 'PS(22:2(13Z,16Z)/18:0)']
843.595	600482	1.23401	0.0200864
843.659	95249.1	1.26623	0.020677	C45H89N2O6P	[M+Hac-H]-	843.66	-0.6	['SM(d16:1/24:1)', 'SM(d18:1/22:1(13Z))', 'SM(d18:2/22:0)']
844.511	8791.04	0.139973	0.000161848	C45H78NO10P	[M+Na-2H]-	844.511	-0.47	['PS(17:1(9Z)/22:4(7Z,10Z,13Z,16Z))', 'PS(19:0/20:5(5Z,8Z,11Z,14Z,17Z))', 'PS(19:1(9Z)/20:4(5Z,8Z,11Z,14Z))', 'PS(20:4(5Z,8Z,11Z,14Z)/19:1(9Z))', 'PS(20:5(5Z,8Z,11Z,14Z,17Z)/19:0)', 'PS(22:4(7Z,10Z,13Z,16Z)/17:1(9Z))']
844.591	39680.1	1.28888	0.0262886
844.609	318993	1.23369	0.0150006	C44H84NO8P	[M+Hac-H]-	844.607	1.5	['PC(14:0/22:2(13Z,16Z))', 'PC(14:1(9Z)/22:1(11Z))', 'PC(16:0/20:2(11Z,14Z))', 'PC(16:1(9Z)/20:1(11Z))', 'PC(17:1(9Z)/19:1(9Z))', 'PC(17:2(9Z,12Z)/19:0)', 'PC(18:0/18:2(10Z,12Z))', 'PC(18:0/18:2(2E,4E))', 'PC(18:0/18:2(6Z,9Z))', 'PC(18:0/18:2(9Z,12Z))', 'PC(18:1(10Z)/18:1(10Z))', 'PC(18:1(11E)/18:1(11E))', 'PC(18:1(11Z)/18:1(11Z))', 'PC(18:1(12Z)/18:1(12Z))', 'PC(18:1(13Z)/18:1(13Z))', 'PC(18:1(1…
844.609	318993	1.23369	0.0150006	C46H88NO10P	[M-H]-	844.607	1.5	['PS(18:0/22:1(11Z))', 'PS(18:1(9Z)/22:0)', 'PS(19:1(9Z)/21:0)', 'PS(20:0/20:1(11Z))', 'PS(20:1(11Z)/20:0)', 'PS(21:0/19:1(9Z))', 'PS(22:0/18:1(9Z))', 'PS(22:1(11Z)/18:0)']
844.663	48372.6	1.31963	0.00543909
845.518	47254.1	0.810215	0.210383	C44H79O13P	[M-H]-	845.519	-0.09	['PI(15:0/20:3(8Z,11Z,14Z))', 'PI(15:1(9Z)/20:2(11Z,14Z))', 'PI(17:0/18:3(6Z,9Z,12Z))', 'PI(17:0/18:3(9Z,12Z,15Z))', 'PI(17:1(9Z)/18:2(9Z,12Z))', 'PI(17:2(9Z,12Z)/18:1(9Z))', 'PI(18:1(9Z)/17:2(9Z,12Z))', 'PI(18:2(9Z,12Z)/17:1(9Z))', 'PI(18:3(6Z,9Z,12Z)/17:0)', 'PI(18:3(9Z,12Z,15Z)/17:0)', 'PI(20:2(11Z,14Z)/15:1(9Z))', 'PI(20:3(8Z,11Z,14Z)/15:0)']
845.611	190097	1.24502	0.00983565
845.675	145874	1.41281	0.00123624	C45H91N2O6P	[M+Hac-H]-	845.675	-0.14	['SM(d16:1/24:0)', 'SM(d18:1/22:0)']
846.55	27595	22.188	0.0056372	C42H78NO10P	[M+Hac-H]-	846.55	-0.63	['PS(14:0/22:2(13Z,16Z))', 'PS(14:1(9Z)/22:1(11Z))', 'PS(16:0/20:2(11Z,14Z))', 'PS(16:1(9Z)/20:1(11Z))', 'PS(17:1(9Z)/19:1(9Z))', 'PS(17:2(9Z,12Z)/19:0)', 'PS(18:0/18:2(9Z,12Z))', 'PS(18:1(9Z)/18:1(9Z))', 'PS(18:2(9Z,12Z)/18:0)', 'PS(19:0/17:2(9Z,12Z))', 'PS(19:1(9Z)/17:1(9Z))', 'PS(20:1(11Z)/16:1(9Z))', 'PS(20:2(11Z,14Z)/16:0)', 'PS(22:1(11Z)/14:1(9Z))', 'PS(22:2(13Z,16Z)/14:0)']
846.608	20661.2	1.16488	0.0788926
846.625	53445	1.33346	0.00753745
846.679	77571.7	1.38044	0.00345396
847.627	36255.7	1.26891	0.0470798	C47H91N2O6P	[M+(37Cl)]-	847.628	-0.85	['SM(d18:2/24:1)']
847.684	32803.7	1.34512	0.332696
847.823	30982	0.902547	0.537262
850.56	31521.2	1.51238	0.00195744	C45H78NO8P	[M+Hac-H]-	850.56	-0.27	['PC(15:0/22:6(4Z,7Z,10Z,13Z,16Z,19Z))', 'PC(17:1(9Z)/20:5(5Z,8Z,11Z,14Z,17Z))', 'PC(17:2(9Z,12Z)/20:4(5Z,8Z,11Z,14Z))', 'PC(20:4(5Z,8Z,11Z,14Z)/17:2(9Z,12Z))', 'PC(20:5(5Z,8Z,11Z,14Z,17Z)/17:1(9Z))', 'PC(22:6(4Z,7Z,10Z,13Z,16Z,19Z)/15:0)', 'PE(18:0/22:6(4Z,7Z,10Z,13Z,16Z,19Z))', 'PE(18:2(9Z,12Z)/22:4(7Z,10Z,13Z,16Z))', 'PE(18:4(6Z,9Z,12Z,15Z)/22:2(13Z,16Z))', 'PE(20:1(11Z)/20:5(5Z,8Z,11Z,14Z,17Z…
850.56	31521.2	1.51238	0.00195744	C47H82NO10P	[M-H]-	850.56	-0.27	['PS(19:1(9Z)/22:4(7Z,10Z,13Z,16Z))', 'PS(20:5(5Z,8Z,11Z,14Z,17Z)/21:0)', 'PS(21:0/20:5(5Z,8Z,11Z,14Z,17Z))', 'PS(22:4(7Z,10Z,13Z,16Z)/19:1(9Z))']
852.539	42702.7	12.6648	1.76e-09	C44H76NO9P	[M+Hac-H]-	852.54	-0.25	['PS(O-16:0/22:6(4Z,7Z,10Z,13Z,16Z,19Z))', 'PS(P-18:0/20:5(5Z,8Z,11Z,14Z,17Z))']
852.576	26923.6	0.992306	0.979233	C45H80NO8P	[M+Hac-H]-	852.576	0.03	['PC(15:1(9Z)/22:4(7Z,10Z,13Z,16Z))', 'PC(17:0/20:5(5Z,8Z,11Z,14Z,17Z))', 'PC(17:1(9Z)/20:4(5Z,8Z,11Z,14Z))', 'PC(17:2(9Z,12Z)/20:3(8Z,11Z,14Z))', 'PC(18:4(6Z,9Z,12Z,15Z)/19:1(9Z))', 'PC(19:1(9Z)/18:4(6Z,9Z,12Z,15Z))', 'PC(20:3(8Z,11Z,14Z)/17:2(9Z,12Z))', 'PC(20:4(5Z,8Z,11Z,14Z)/17:1(9Z))', 'PC(20:5(5Z,8Z,11Z,14Z,17Z)/17:0)', 'PC(22:4(7Z,10Z,13Z,16Z)/15:1(9Z))', 'PE(18:1(9Z)/22:4(7Z,10Z,13Z,16Z))…
852.576	26923.6	0.992306	0.979233	C47H84NO10P	[M-H]-	852.576	0.03	['PS(19:0/22:4(7Z,10Z,13Z,16Z))', 'PS(20:4(5Z,8Z,11Z,14Z)/21:0)', 'PS(21:0/20:4(5Z,8Z,11Z,14Z))', 'PS(22:4(7Z,10Z,13Z,16Z)/19:0)']
853.487	104391	0.746072	0.0279263	C47H76O11	[M+K-2H]-	853.487	-0.53	['NA']
853.487	104391	0.746072	0.0279263	C45H75O13P	[M-H]-	853.487	-0.39	['PI(14:0/22:6(4Z,7Z,10Z,13Z,16Z,19Z))', 'PI(16:1(9Z)/20:5(5Z,8Z,11Z,14Z,17Z))', 'PI(18:2(9Z,12Z)/18:4(6Z,9Z,12Z,15Z))', 'PI(18:3(6Z,9Z,12Z)/18:3(6Z,9Z,12Z))', 'PI(18:3(6Z,9Z,12Z)/18:3(9Z,12Z,15Z))', 'PI(18:3(9Z,12Z,15Z)/18:3(6Z,9Z,12Z))', 'PI(18:3(9Z,12Z,15Z)/18:3(9Z,12Z,15Z))', 'PI(18:4(6Z,9Z,12Z,15Z)/18:2(9Z,12Z))', 'PI(20:5(5Z,8Z,11Z,14Z,17Z)/16:1(9Z))', 'PI(22:6(4Z,7Z,10Z,13Z,16Z,19Z)/14:0)']
854.49	46553.8	0.630325	0.0134532
854.555	47206.8	2.71309	5.13e-07	C44H78NO9P	[M+Hac-H]-	854.555	-0.23	['PS(O-18:0/20:5(5Z,8Z,11Z,14Z,17Z))', 'PS(P-16:0/22:4(7Z,10Z,13Z,16Z))', 'PS(P-18:0/20:4(5Z,8Z,11Z,14Z))', 'PS(P-20:0/18:4(6Z,9Z,12Z,15Z))']
854.592	39277.6	1.31439	0.00156977	C45H82NO8P	[M+Hac-H]-	854.592	-0.13	['PC(15:0/22:4(7Z,10Z,13Z,16Z))', 'PC(17:0/20:4(5Z,8Z,11Z,14Z))', 'PC(17:1(9Z)/20:3(8Z,11Z,14Z))', 'PC(17:2(9Z,12Z)/20:2(11Z,14Z))', 'PC(18:3(6Z,9Z,12Z)/19:1(9Z))', 'PC(18:3(9Z,12Z,15Z)/19:1(9Z))', 'PC(18:4(6Z,9Z,12Z,15Z)/19:0)', 'PC(19:0/18:4(6Z,9Z,12Z,15Z))', 'PC(19:1(9Z)/18:3(6Z,9Z,12Z))', 'PC(19:1(9Z)/18:3(9Z,12Z,15Z))', 'PC(20:2(11Z,14Z)/17:2(9Z,12Z))', 'PC(20:3(8Z,11Z,14Z)/17:1(9Z))', 'PC(2…
854.592	39277.6	1.31439	0.00156977	C47H86NO10P	[M-H]-	854.592	-0.13	['PS(19:1(9Z)/22:2(13Z,16Z))', 'PS(20:3(8Z,11Z,14Z)/21:0)', 'PS(21:0/20:3(8Z,11Z,14Z))', 'PS(22:2(13Z,16Z)/19:1(9Z))']
855.503	180362	0.707494	0.00686884	C45H77O13P	[M-H]-	855.503	-0.14	['PI(14:1(9Z)/22:4(7Z,10Z,13Z,16Z))', 'PI(16:0/20:5(5Z,8Z,11Z,14Z,17Z))', 'PI(16:1(9Z)/20:4(5Z,8Z,11Z,14Z))', 'PI(18:1(9Z)/18:4(6Z,9Z,12Z,15Z))', 'PI(18:2(9Z,12Z)/18:3(6Z,9Z,12Z))', 'PI(18:2(9Z,12Z)/18:3(9Z,12Z,15Z))', 'PI(18:3(6Z,9Z,12Z)/18:2(9Z,12Z))', 'PI(18:3(9Z,12Z,15Z)/18:2(9Z,12Z))', 'PI(18:4(6Z,9Z,12Z,15Z)/18:1(9Z))', 'PI(20:4(5Z,8Z,11Z,14Z)/16:1(9Z))', 'PI(20:5(5Z,8Z,11Z,14Z,17Z)/16:0)',…
855.558	19882.5	7.56834	4.87e-08
856.506	86445.6	0.645457	0.0013067	C46H78NO9P	[M+(37Cl)]-	856.508	-1.62	['PS(P-18:0/22:6(4Z,7Z,10Z,13Z,16Z,19Z))']
856.571	42623.8	1.96224	2.35e-05	C44H80NO9P	[M+Hac-H]-	856.571	0.33	['PC(16:0/20:4(5Z,8Z,10E,14Z)(12OH[S]))', 'PC(16:0/20:4(6E,8Z,11Z,14Z)(5OH[S]))', 'PS(O-16:0/22:4(7Z,10Z,13Z,16Z))', 'PS(O-18:0/20:4(5Z,8Z,11Z,14Z))', 'PS(O-20:0/18:4(6Z,9Z,12Z,15Z))', 'PS(P-18:0/20:3(8Z,11Z,14Z))', 'PS(P-20:0/18:3(6Z,9Z,12Z))', 'PS(P-20:0/18:3(9Z,12Z,15Z))']
856.608	31575.5	1.28251	0.0253971	C45H84NO8P	[M+Hac-H]-	856.607	0.26	['PC(15:1(9Z)/22:2(13Z,16Z))', 'PC(17:0/20:3(8Z,11Z,14Z))', 'PC(17:1(9Z)/20:2(11Z,14Z))', 'PC(17:2(9Z,12Z)/20:1(11Z))', 'PC(18:2(9Z,12Z)/19:1(9Z))', 'PC(18:3(6Z,9Z,12Z)/19:0)', 'PC(18:3(9Z,12Z,15Z)/19:0)', 'PC(19:0/18:3(6Z,9Z,12Z))', 'PC(19:0/18:3(9Z,12Z,15Z))', 'PC(19:1(9Z)/18:2(9Z,12Z))', 'PC(20:1(11Z)/17:2(9Z,12Z))', 'PC(20:2(11Z,14Z)/17:1(9Z))', 'PC(20:3(8Z,11Z,14Z)/17:0)', 'PC(22:2(13Z,16Z)/…
856.608	31575.5	1.28251	0.0253971	C47H88NO10P	[M-H]-	856.607	0.26	['PS(19:0/22:2(13Z,16Z))', 'PS(19:1(9Z)/22:1(11Z))', 'PS(20:2(11Z,14Z)/21:0)', 'PS(21:0/20:2(11Z,14Z))', 'PS(22:1(11Z)/19:1(9Z))', 'PS(22:2(13Z,16Z)/19:0)']
857.286	25115.9	0.324571	0.067713
857.489	3829.97	0.404255	0.00153895
857.518	725839	0.742717	0.0259181	C45H79O13P	[M-H]-	857.519	-0.22	['PI(14:0/22:4(7Z,10Z,13Z,16Z))', 'PI(16:0/20:4(5Z,8Z,11Z,14Z))', 'PI(16:1(9Z)/20:3(8Z,11Z,14Z))', 'PI(18:0/18:4(6Z,9Z,12Z,15Z))', 'PI(18:1(9Z)/18:3(6Z,9Z,12Z))', 'PI(18:1(9Z)/18:3(9Z,12Z,15Z))', 'PI(18:2(9Z,12Z)/18:2(9Z,12Z))', 'PI(18:3(6Z,9Z,12Z)/18:1(9Z))', 'PI(18:3(9Z,12Z,15Z)/18:1(9Z))', 'PI(18:4(6Z,9Z,12Z,15Z)/18:0)', 'PI(20:3(8Z,11Z,14Z)/16:1(9Z))', 'PI(20:4(5Z,8Z,11Z,14Z)/16:0)', 'PI(22:4…
858.522	350090	0.721624	0.0159758
858.588	14763.4	5.22136	0.000117999	C44H82NO9P	[M+Hac-H]-	858.587	1.71	['PS(O-18:0/20:3(8Z,11Z,14Z))', 'PS(O-20:0/18:3(6Z,9Z,12Z))', 'PS(O-20:0/18:3(9Z,12Z,15Z))', 'PS(P-16:0/22:2(13Z,16Z))', 'PS(P-18:0/20:2(11Z,14Z))', 'PS(P-20:0/18:2(9Z,12Z))']
859.011	29372.1	0.392013	0.030401
859.433	98309	0.486809	0.121146	C40H64O16	[M+Hac-H]-	859.433	0.07	['Spongipregnoloside D']
859.515	24735	0.701548	0.0224716
859.535	442798	0.757605	0.0559247	C45H81O13P	[M-H]-	859.534	0.36	['PI(14:1(9Z)/22:2(13Z,16Z))', 'PI(16:0/20:3(8Z,11Z,14Z))', 'PI(16:1(9Z)/20:2(11Z,14Z))', 'PI(17:2(9Z,12Z)/19:1(9Z))', 'PI(18:0/18:3(6Z,9Z,12Z))', 'PI(18:0/18:3(9Z,12Z,15Z))', 'PI(18:1(9Z)/18:2(9Z,12Z))', 'PI(18:2(9Z,12Z)/18:1(9Z))', 'PI(18:3(6Z,9Z,12Z)/18:0)', 'PI(18:3(9Z,12Z,15Z)/18:0)', 'PI(19:1(9Z)/17:2(9Z,12Z))', 'PI(20:2(11Z,14Z)/16:1(9Z))', 'PI(20:3(8Z,11Z,14Z)/16:0)', 'PI(22:2(13Z,16Z)/14…
859.69	25903.5	1.51679	0.00192324	C46H93N2O6P	[M+Hac-H]-	859.691	-0.57	['SM(d16:1/25:0)', 'SM(d17:1/24:0)', 'SM(d18:1/23:0)']
860.437	47511.5	0.502558	0.136363
860.537	208229	0.664749	0.0137185
861.533	14128.8	0.199607	5.42e-05
861.551	189109	0.850489	0.244456	C45H83O13P	[M-H]-	861.55	1.16	['PI(14:0/22:2(13Z,16Z))', 'PI(14:1(9Z)/22:1(11Z))', 'PI(16:0/20:2(11Z,14Z))', 'PI(16:1(9Z)/20:1(11Z))', 'PI(17:1(9Z)/19:1(9Z))', 'PI(17:2(9Z,12Z)/19:0)', 'PI(18:0/18:2(9Z,12Z))', 'PI(18:2(9Z,12Z)/18:0)', 'PI(19:0/17:2(9Z,12Z))', 'PI(19:1(9Z)/17:1(9Z))', 'PI(20:1(11Z)/16:1(9Z))', 'PI(20:2(11Z,14Z)/16:0)', 'PI(22:1(11Z)/14:1(9Z))', 'PI(22:2(13Z,16Z)/14:0)']
863.567	35361.2	0.554651	0.141394	C45H85O13P	[M-H]-	863.566	1.61	['PI(14:0/22:1(11Z))', 'PI(14:1(9Z)/22:0)', 'PI(15:1(9Z)/21:0)', 'PI(16:0/20:1(11Z))', 'PI(16:1(9Z)/20:0)', 'PI(17:0/19:1(9Z))', 'PI(17:1(9Z)/19:0)', 'PI(18:0/18:1(9Z))', 'PI(18:1(9Z)/18:0)', 'PI(19:0/17:1(9Z))', 'PI(19:1(9Z)/17:0)', 'PI(20:0/16:1(9Z))', 'PI(20:1(11Z)/16:0)', 'PI(21:0/15:1(9Z))', 'PI(22:0/14:1(9Z))', 'PI(22:1(11Z)/14:0)']
863.68	29697.8	0.701857	0.321817
864.576	110923	1.20281	0.0564359	C46H80NO8P	[M+Hac-H]-	864.576	0.28	['PC(16:0/22:6(4E,7E,10E,13E,16E,19E))', 'PC(16:0/22:6(4Z,7Z,10Z,13Z,16Z,19Z))', 'PC(18:1(11Z)/20:5(5Z,8Z,11Z,14Z,17Z))', 'PC(18:1(9Z)/20:5(5Z,8Z,11Z,14Z,17Z))', 'PC(18:2(9Z,12Z)/20:4(5Z,8Z,11Z,14Z))', 'PC(18:3(6Z,9Z,12Z)/20:3(8Z,11Z,14Z))', 'PC(18:3(9Z,12Z,15Z)/20:3(8Z,11Z,14Z))', 'PC(18:4(6Z,9Z,12Z,15Z)/20:2(11Z,14Z))', 'PC(20:2(11Z,14Z)/18:4(6Z,9Z,12Z,15Z))', 'PC(20:3(8Z,11Z,14Z)/18:3(6Z,9Z,12…
864.576	110923	1.20281	0.0564359	C48H84NO10P	[M-H]-	864.576	0.28	['PS(20:1(11Z)/22:4(7Z,10Z,13Z,16Z))', 'PS(20:3(8Z,11Z,14Z)/22:2(13Z,16Z))', 'PS(20:4(5Z,8Z,11Z,14Z)/22:1(11Z))', 'PS(20:5(5Z,8Z,11Z,14Z,17Z)/22:0)', 'PS(22:0/20:5(5Z,8Z,11Z,14Z,17Z))', 'PS(22:1(11Z)/20:4(5Z,8Z,11Z,14Z))', 'PS(22:2(13Z,16Z)/20:3(8Z,11Z,14Z))', 'PS(22:4(7Z,10Z,13Z,16Z)/20:1(11Z))']
864.683	23412.7	1.02854	0.928797	C49H98NO7P	[M+Na-2H]-	864.683	0.75	['PC(P-20:0/21:0)']
865.028	58100.6	0.650998	0.192144
865.58	57284.6	1.18133	0.171081	C45H87O13P	[M-H]-	865.581	-1.8	['PI(14:0/22:0)', 'PI(15:0/21:0)', 'PI(16:0/20:0)', 'PI(17:0/19:0)', 'PI(18:0/18:0)', 'PI(19:0/17:0)', 'PI(20:0/16:0)', 'PI(21:0/15:0)', 'PI(22:0/14:0)']
866.592	106866	0.997904	0.993294	C46H82NO8P	[M+Hac-H]-	866.592	0.09	['PC(16:0/22:5(4Z,7Z,10Z,13Z,16Z))', 'PC(16:0/22:5(7Z,10Z,13Z,16Z,19Z))', 'PC(16:1(9Z)/22:4(7Z,10Z,13Z,16Z))', 'PC(18:0/20:5(5Z,8Z,11Z,14Z,17Z))', 'PC(18:0/20:5(9Z,11Z,13Z,15Z,17Z))', 'PC(18:1(9Z)/20:4(5Z,8Z,11Z,14Z))', 'PC(18:2(9Z,12Z)/20:3(8Z,11Z,14Z))', 'PC(18:3(6Z,9Z,12Z)/20:2(11Z,14Z))', 'PC(18:3(9Z,12Z,15Z)/20:2(11Z,14Z))', 'PC(18:4(6Z,9Z,12Z,15Z)/20:1(11Z))', 'PC(20:1(11Z)/18:4(6Z,9Z,12Z,1…
866.592	106866	0.997904	0.993294	C48H86NO10P	[M-H]-	866.592	0.09	['PS(20:0/22:4(7Z,10Z,13Z,16Z))', 'PS(20:2(11Z,14Z)/22:2(13Z,16Z))', 'PS(20:3(8Z,11Z,14Z)/22:1(11Z))', 'PS(20:4(5Z,8Z,11Z,14Z)/22:0)', 'PS(22:0/20:4(5Z,8Z,11Z,14Z))', 'PS(22:1(11Z)/20:3(8Z,11Z,14Z))', 'PS(22:2(13Z,16Z)/20:2(11Z,14Z))', 'PS(22:4(7Z,10Z,13Z,16Z)/20:0)']
867.4	20074.6	0.402308	0.0821689
867.595	58094.8	1.04549	0.869503
868.534	41649.1	33.3207	4.2e-05	C44H76NO10P	[M+Hac-H]-	868.535	-1.14	['PS(16:1(9Z)/22:4(7Z,10Z,13Z,16Z))', 'PS(18:0/20:5(5Z,8Z,11Z,14Z,17Z))', 'PS(18:1(9Z)/20:4(5Z,8Z,11Z,14Z))', 'PS(18:2(9Z,12Z)/20:3(8Z,11Z,14Z))', 'PS(18:3(6Z,9Z,12Z)/20:2(11Z,14Z))', 'PS(18:3(9Z,12Z,15Z)/20:2(11Z,14Z))', 'PS(18:4(6Z,9Z,12Z,15Z)/20:1(11Z))', 'PS(20:1(11Z)/18:4(6Z,9Z,12Z,15Z))', 'PS(20:2(11Z,14Z)/18:3(6Z,9Z,12Z))', 'PS(20:2(11Z,14Z)/18:3(9Z,12Z,15Z))', 'PS(20:3(8Z,11Z,14Z)/18:2(9Z…
868.571	41252.7	1.59294	0.0652998
868.608	77056.8	1.29627	0.00345515	C46H84NO8P	[M+Hac-H]-	868.607	0.6	['PC(16:0/22:4(7Z,10Z,13Z,16Z))', 'PC(18:0/20:4(5Z,8Z,11Z,14Z))', 'PC(18:0/20:4(8Z,10Z,12Z,14Z))', 'PC(18:1(9Z)/20:3(5Z,8Z,11Z))', 'PC(18:1(9Z)/20:3(8Z,11Z,14Z))', 'PC(18:2(9Z,12Z)/20:2(11Z,14Z))', 'PC(18:3(6Z,9Z,12Z)/20:1(11Z))', 'PC(18:3(9Z,12Z,15Z)/20:1(11Z))', 'PC(18:4(6Z,9Z,12Z,15Z)/20:0)', 'PC(20:0/18:4(6Z,9Z,12Z,15Z))', 'PC(20:1(11Z)/18:3(6Z,9Z,12Z))', 'PC(20:1(11Z)/18:3(9Z,12Z,15Z))', 'PC…
868.608	77056.8	1.29627	0.00345515	C48H88NO10P	[M-H]-	868.607	0.6	['PS(20:1(11Z)/22:2(13Z,16Z))', 'PS(20:2(11Z,14Z)/22:1(11Z))', 'PS(20:3(8Z,11Z,14Z)/22:0)', 'PS(22:0/20:3(8Z,11Z,14Z))', 'PS(22:1(11Z)/20:2(11Z,14Z))', 'PS(22:2(13Z,16Z)/20:1(11Z))']
869.537	19834.8	15.8685	0.000148755
869.611	41029.2	1.30653	0.00309859
870.549	47154.4	37.725	0.000149493	C44H78NO10P	[M+Hac-H]-	870.55	-0.79	['PS(16:0/22:4(7Z,10Z,13Z,16Z))', 'PS(18:0/20:4(5Z,8Z,11Z,14Z))', 'PS(18:1(9Z)/20:3(8Z,11Z,14Z))', 'PS(18:2(9Z,12Z)/20:2(11Z,14Z))', 'PS(18:3(6Z,9Z,12Z)/20:1(11Z))', 'PS(18:3(9Z,12Z,15Z)/20:1(11Z))', 'PS(18:4(6Z,9Z,12Z,15Z)/20:0)', 'PS(20:0/18:4(6Z,9Z,12Z,15Z))', 'PS(20:1(11Z)/18:3(6Z,9Z,12Z))', 'PS(20:1(11Z)/18:3(9Z,12Z,15Z))', 'PS(20:2(11Z,14Z)/18:2(9Z,12Z))', 'PS(20:3(8Z,11Z,14Z)/18:1(9Z))', '…
870.623	51131.2	1.29597	0.0442919	C46H86NO8P	[M+Hac-H]-	870.623	0.37	['PC(16:1(9Z)/22:2(13Z,16Z))', 'PC(18:0/20:3(5Z,11Z,14Z))', 'PC(18:0/20:3(5Z,8Z,11Z))', 'PC(18:0/20:3(5Z,8Z,14Z))', 'PC(18:0/20:3(8Z,11Z,14Z))', 'PC(18:1(9Z)/20:2(11Z,14Z))', 'PC(18:2(9Z,12Z)/20:1(11Z))', 'PC(18:2(9Z,12Z)/20:1(13Z))', 'PC(18:3(6Z,9Z,12Z)/20:0)', 'PC(18:3(9Z,12Z,15Z)/20:0)', 'PC(20:0/18:3(6Z,9Z,12Z))', 'PC(20:0/18:3(9Z,12Z,15Z))', 'PC(20:1(11Z)/18:2(9Z,12Z))', 'PC(20:2(11Z,14Z)/18…
870.623	51131.2	1.29597	0.0442919	C48H90NO10P	[M-H]-	870.623	0.37	['PS(20:0/22:2(13Z,16Z))', 'PS(20:1(11Z)/22:1(11Z))', 'PS(20:2(11Z,14Z)/22:0)', 'PS(22:0/20:2(11Z,14Z))', 'PS(22:1(11Z)/20:1(11Z))', 'PS(22:2(13Z,16Z)/20:0)']
871.535	26250.5	0.225056	0.0019261	C46H81O13P	[M-H]-	871.534	0.96	['PI(15:0/22:4(7Z,10Z,13Z,16Z))', 'PI(17:0/20:4(5Z,8Z,11Z,14Z))', 'PI(17:1(9Z)/20:3(8Z,11Z,14Z))', 'PI(17:2(9Z,12Z)/20:2(11Z,14Z))', 'PI(18:3(6Z,9Z,12Z)/19:1(9Z))', 'PI(18:3(9Z,12Z,15Z)/19:1(9Z))', 'PI(18:4(6Z,9Z,12Z,15Z)/19:0)', 'PI(19:0/18:4(6Z,9Z,12Z,15Z))', 'PI(19:1(9Z)/18:3(6Z,9Z,12Z))', 'PI(19:1(9Z)/18:3(9Z,12Z,15Z))', 'PI(20:2(11Z,14Z)/17:2(9Z,12Z))', 'PI(20:3(8Z,11Z,14Z)/17:1(9Z))', 'PI(2…
873.027	54557.2	0.475701	0.143931
873.568	33716.2	26.9741	5.31e-06
873.706	29520.8	1.28352	0.102072	C47H95N2O6P	[M+Hac-H]-	873.707	-0.25	['SM(d18:0/24:1(15Z))', 'SM(d18:1/24:0)']
875.398	39423.9	0.34211	0.0194562
877.487	28838	0.487511	0.00983565	C45H77O13P	[M+Na-2H]-	877.485	1.98	['PI(14:1(9Z)/22:4(7Z,10Z,13Z,16Z))', 'PI(16:0/20:5(5Z,8Z,11Z,14Z,17Z))', 'PI(16:1(9Z)/20:4(5Z,8Z,11Z,14Z))', 'PI(18:1(9Z)/18:4(6Z,9Z,12Z,15Z))', 'PI(18:2(9Z,12Z)/18:3(6Z,9Z,12Z))', 'PI(18:2(9Z,12Z)/18:3(9Z,12Z,15Z))', 'PI(18:3(6Z,9Z,12Z)/18:2(9Z,12Z))', 'PI(18:3(9Z,12Z,15Z)/18:2(9Z,12Z))', 'PI(18:4(6Z,9Z,12Z,15Z)/18:1(9Z))', 'PI(20:4(5Z,8Z,11Z,14Z)/16:1(9Z))', 'PI(20:5(5Z,8Z,11Z,14Z,17Z)/16:0)',…
877.487	28838	0.487511	0.00983565	C47H75O13P	[M-H]-	877.487	-0.76	['PI(18:3(6Z,9Z,12Z)/20:5(5Z,8Z,11Z,14Z,17Z))', 'PI(18:3(9Z,12Z,15Z)/20:5(5Z,8Z,11Z,14Z,17Z))', 'PI(18:4(6Z,9Z,12Z,15Z)/20:4(5Z,8Z,11Z,14Z))', 'PI(20:4(5Z,8Z,11Z,14Z)/18:4(6Z,9Z,12Z,15Z))', 'PI(20:5(5Z,8Z,11Z,14Z,17Z)/18:3(6Z,9Z,12Z))', 'PI(20:5(5Z,8Z,11Z,14Z,17Z)/18:3(9Z,12Z,15Z))']
879.044	90690.5	0.63179	0.252376
879.503	47414.6	0.482832	0.00142977	C47H77O13P	[M-H]-	879.503	-0.2	['PI(16:1(9Z)/22:6(4Z,7Z,10Z,13Z,16Z,19Z))', 'PI(18:2(9Z,12Z)/20:5(5Z,8Z,11Z,14Z,17Z))', 'PI(18:3(6Z,9Z,12Z)/20:4(5Z,8Z,11Z,14Z))', 'PI(18:3(9Z,12Z,15Z)/20:4(5Z,8Z,11Z,14Z))', 'PI(18:4(6Z,9Z,12Z,15Z)/20:3(8Z,11Z,14Z))', 'PI(20:3(8Z,11Z,14Z)/18:4(6Z,9Z,12Z,15Z))', 'PI(20:4(5Z,8Z,11Z,14Z)/18:3(6Z,9Z,12Z))', 'PI(20:4(5Z,8Z,11Z,14Z)/18:3(9Z,12Z,15Z))', 'PI(20:5(5Z,8Z,11Z,14Z,17Z)/18:2(9Z,12Z))', 'PI(…
881.415	128609	0.489653	0.0899217
881.518	202326	0.667437	0.00251315	C47H79O13P	[M-H]-	881.519	-0.61	['PI(16:0/22:6(4Z,7Z,10Z,13Z,16Z,19Z))', 'PI(18:1(9Z)/20:5(5Z,8Z,11Z,14Z,17Z))', 'PI(18:2(9Z,12Z)/20:4(5Z,8Z,11Z,14Z))', 'PI(18:3(6Z,9Z,12Z)/20:3(8Z,11Z,14Z))', 'PI(18:3(9Z,12Z,15Z)/20:3(8Z,11Z,14Z))', 'PI(18:4(6Z,9Z,12Z,15Z)/20:2(11Z,14Z))', 'PI(20:2(11Z,14Z)/18:4(6Z,9Z,12Z,15Z))', 'PI(20:3(8Z,11Z,14Z)/18:3(6Z,9Z,12Z))', 'PI(20:3(8Z,11Z,14Z)/18:3(9Z,12Z,15Z))', 'PI(20:4(5Z,8Z,11Z,14Z)/18:2(9Z,12…
882.419	58446.7	0.453966	0.0780401
882.465	17054.5	0.178974	0.00926998
883.514	6819.84	0.183281	4.42e-09
883.534	364662	0.689288	0.0068186	C47H81O13P	[M-H]-	883.534	-0.15	['PI(16:1(9Z)/22:4(7Z,10Z,13Z,16Z))', 'PI(18:0/20:5(5Z,8Z,11Z,14Z,17Z))', 'PI(18:1(9Z)/20:4(5Z,8Z,11Z,14Z))', 'PI(18:2(9Z,12Z)/20:3(8Z,11Z,14Z))', 'PI(18:3(6Z,9Z,12Z)/20:2(11Z,14Z))', 'PI(18:3(9Z,12Z,15Z)/20:2(11Z,14Z))', 'PI(18:4(6Z,9Z,12Z,15Z)/20:1(11Z))', 'PI(20:1(11Z)/18:4(6Z,9Z,12Z,15Z))', 'PI(20:2(11Z,14Z)/18:3(6Z,9Z,12Z))', 'PI(20:2(11Z,14Z)/18:3(9Z,12Z,15Z))', 'PI(20:3(8Z,11Z,14Z)/18:2(9Z…
884.562	13100.3	0.489185	0.0627471
885.386	37745.6	0.854178	0.712552
885.53	8255.5	0.223643	0.000263795
885.55	188081	0.715376	0.0200864	C47H83O13P	[M-H]-	885.55	0.53	['Glc-GP(18:0/20:4(5Z,8Z,11Z,14Z))', 'PI(16:0/22:4(7Z,10Z,13Z,16Z))', 'PI(18:0/20:4(5Z,8Z,11Z,14Z))', 'PI(18:1(9Z)/20:3(8Z,11Z,14Z))', 'PI(18:2(9Z,12Z)/20:2(11Z,14Z))', 'PI(18:3(6Z,9Z,12Z)/20:1(11Z))', 'PI(18:3(9Z,12Z,15Z)/20:1(11Z))', 'PI(18:4(6Z,9Z,12Z,15Z)/20:0)', 'PI(20:0/18:4(6Z,9Z,12Z,15Z))', 'PI(20:1(11Z)/18:3(6Z,9Z,12Z))', 'PI(20:1(11Z)/18:3(9Z,12Z,15Z))', 'PI(20:2(11Z,14Z)/18:2(9Z,12Z))'…
887.55	6985.9	0.175437	6.46e-05
889.581	34942.8	0.556806	0.103408	C47H87O13P	[M-H]-	889.581	-0.21	['PI(16:0/22:2(13Z,16Z))', 'PI(16:1(9Z)/22:1(11Z))', 'PI(17:2(9Z,12Z)/21:0)', 'PI(18:0/20:2(11Z,14Z))', 'PI(18:1(9Z)/20:1(11Z))', 'PI(18:2(9Z,12Z)/20:0)', 'PI(19:1(9Z)/19:1(9Z))', 'PI(20:0/18:2(9Z,12Z))', 'PI(20:1(11Z)/18:1(9Z))', 'PI(20:2(11Z,14Z)/18:0)', 'PI(21:0/17:2(9Z,12Z))', 'PI(22:1(11Z)/16:1(9Z))', 'PI(22:2(13Z,16Z)/16:0)']
892.532	15976.8	0.68125	0.284756
892.608	38400.2	2.23775	0.00345515	C48H84NO8P	[M+Hac-H]-	892.607	0.53	['PC(18:0/22:6(4Z,7Z,10Z,13Z,16Z,19Z))', 'PC(18:0/22:6(9Z,11Z,13Z,15Z,17Z,19))', 'PC(18:1(11Z)/22:5(7Z,10Z,13Z,16Z,19Z))', 'PC(18:2(9Z,12Z)/22:4(7Z,10Z,13Z,16Z))', 'PC(18:4(6Z,9Z,12Z,15Z)/22:2(13Z,16Z))', 'PC(20:1(11Z)/20:5(5Z,8Z,11Z,14Z,17Z))', 'PC(20:2(11Z,14Z)/20:4(5Z,8Z,11Z,14Z))', 'PC(20:3(8Z,11Z,14Z)/20:3(8Z,11Z,14Z))', 'PC(20:4(5Z,8Z,11Z,14Z)/20:2(11Z,14Z))', 'PC(20:5(5Z,8Z,11Z,14Z,17Z)/20…
892.608	38400.2	2.23775	0.00345515	C50H88NO10P	[M-H]-	892.607	0.53	['PS(22:1(11Z)/22:4(7Z,10Z,13Z,16Z))', 'PS(22:4(7Z,10Z,13Z,16Z)/22:1(11Z))']
894.548	63982.1	0.908071	0.600738
894.623	39897.9	1.54791	0.0242254	C48H86NO8P	[M+Hac-H]-	894.623	0.25	['PC(18:0/22:5(4Z,7Z,10Z,13Z,16Z))', 'PC(18:0/22:5(7Z,10Z,13Z,16Z,19Z))', 'PC(18:1(9Z)/22:4(7Z,10Z,13Z,16Z))', 'PC(18:3(6Z,9Z,12Z)/22:2(13Z,16Z))', 'PC(18:3(9Z,12Z,15Z)/22:2(13Z,16Z))', 'PC(18:4(6Z,9Z,12Z,15Z)/22:1(11Z))', 'PC(20:0/20:5(5Z,8Z,11Z,14Z,17Z))', 'PC(20:1(11Z)/20:4(5Z,8Z,11Z,14Z))', 'PC(20:2(11Z,14Z)/20:3(8Z,11Z,14Z))', 'PC(20:3(8Z,11Z,14Z)/20:2(11Z,14Z))', 'PC(20:4(5Z,8Z,11Z,14Z)/20:…
894.623	39897.9	1.54791	0.0242254	C50H90NO10P	[M-H]-	894.623	0.25	['PS(22:0/22:4(7Z,10Z,13Z,16Z))', 'PS(22:2(13Z,16Z)/22:2(13Z,16Z))', 'PS(22:4(7Z,10Z,13Z,16Z)/22:0)']
895.55	26907.9	0.951143	0.881818
896.563	221969	0.935452	0.668527
896.639	33437.1	1.38052	0.00674961	C48H88NO8P	[M+Hac-H]-	896.639	0.01	['PC(18:0/22:4(7Z,10Z,13Z,16Z))', 'PC(18:2(9Z,12Z)/22:2(13Z,16Z))', 'PC(18:3(6Z,9Z,12Z)/22:1(11Z))', 'PC(18:3(9Z,12Z,15Z)/22:1(11Z))', 'PC(18:4(6Z,9Z,12Z,15Z)/22:0)', 'PC(20:0/20:4(5Z,8Z,11Z,14Z))', 'PC(20:1(11Z)/20:3(8Z,11Z,14Z))', 'PC(20:2(11E,14E)/20:2(11E,14E))', 'PC(20:2(11Z,14Z)/20:2(11Z,14Z))', 'PC(20:3(8Z,11Z,14Z)/20:1(11Z))', 'PC(20:4(5Z,8Z,11Z,14Z)/20:0)', 'PC(22:0/18:4(6Z,9Z,12Z,15Z))'…
896.639	33437.1	1.38052	0.00674961	C50H92NO10P	[M-H]-	896.639	0.01	['PS(22:1(11Z)/22:2(13Z,16Z))', 'PS(22:2(13Z,16Z)/22:1(11Z))']
897.567	107641	0.989265	0.94599
898.482	18327.6	0.217544	0.00684366
898.58	109315	1.00137	0.992157	C46H82NO10P	[M+Hac-H]-	898.581	-1.71	['PS(18:0/22:4(7Z,10Z,13Z,16Z))', 'PS(18:2(9Z,12Z)/22:2(13Z,16Z))', 'PS(18:3(6Z,9Z,12Z)/22:1(11Z))', 'PS(18:3(9Z,12Z,15Z)/22:1(11Z))', 'PS(18:4(6Z,9Z,12Z,15Z)/22:0)', 'PS(20:0/20:4(5Z,8Z,11Z,14Z))', 'PS(20:1(11Z)/20:3(8Z,11Z,14Z))', 'PS(20:2(11Z,14Z)/20:2(11Z,14Z))', 'PS(20:3(8Z,11Z,14Z)/20:1(11Z))', 'PS(20:4(5Z,8Z,11Z,14Z)/20:0)', 'PS(22:0/18:4(6Z,9Z,12Z,15Z))', 'PS(22:1(11Z)/18:3(6Z,9Z,12Z))', …
898.654	31698.8	1.25557	0.0900049	C48H90NO8P	[M+Hac-H]-	898.654	0.09	['PC(18:0/22:3(10Z,13Z,16Z))', 'PC(18:1(9Z)/22:2(13Z,16Z))', 'PC(18:2(9Z,12Z)/22:1(11Z))', 'PC(18:3(6Z,9Z,12Z)/22:0)', 'PC(18:3(9Z,12Z,15Z)/22:0)', 'PC(20:0/20:3(11Z,14Z,17Z))', 'PC(20:0/20:3(8Z,11Z,14Z))', 'PC(20:1(11Z)/20:2(11Z,14Z))', 'PC(20:2(11Z,14Z)/20:1(11Z))', 'PC(20:3(8Z,11Z,14Z)/20:0)', 'PC(22:0/18:3(6Z,9Z,12Z))', 'PC(22:0/18:3(9Z,12Z,15Z))', 'PC(22:1(11Z)/18:2(9Z,12Z))', 'PC(22:2(13Z,1…
898.654	31698.8	1.25557	0.0900049	C50H94NO10P	[M-H]-	898.654	0.09	['PS(22:0/22:2(13Z,16Z))', 'PS(22:1(11Z)/22:1(11Z))', 'PS(22:2(13Z,16Z)/22:0)']
899.582	62188.3	0.971991	0.838919
900.498	29155.8	0.283636	0.00371286
900.595	89290.6	1.12354	0.375849
901.501	12791.4	0.232647	0.00650194	C47H79O12P	[M+Cl]-	901.5	1.05	['PI(P-16:0/22:6(4Z,7Z,10Z,13Z,16Z,19Z))']
901.599	66974.2	1.33366	0.281991
902.514	44860.5	0.343977	0.0134532
903.397	43301	0.475795	0.0940367
906.548	29606.4	0.690195	0.160161
910.58	20850.5	2.72488	0.0178696	C47H82NO10P	[M+Hac-H]-	910.581	-1.82	['PS(19:1(9Z)/22:4(7Z,10Z,13Z,16Z))', 'PS(20:5(5Z,8Z,11Z,14Z,17Z)/21:0)', 'PS(21:0/20:5(5Z,8Z,11Z,14Z,17Z))', 'PS(22:4(7Z,10Z,13Z,16Z)/19:1(9Z))']
910.617	19852.6	15.9939	0.000164673	C48H86NO9P	[M+Hac-H]-	910.618	-0.41	['PS(P-20:0/22:4(7Z,10Z,13Z,16Z))']
915.597	43977.6	0.686054	0.147493	C49H89O13P	[M-H]-	915.597	0.47	['PI(18:1(9Z)/22:2(13Z,16Z))', 'PI(18:2(9Z,12Z)/22:1(11Z))', 'PI(18:3(6Z,9Z,12Z)/22:0)', 'PI(18:3(9Z,12Z,15Z)/22:0)', 'PI(20:0/20:3(8Z,11Z,14Z))', 'PI(20:1(11Z)/20:2(11Z,14Z))', 'PI(20:2(11Z,14Z)/20:1(11Z))', 'PI(20:3(8Z,11Z,14Z)/20:0)', 'PI(22:0/18:3(6Z,9Z,12Z))', 'PI(22:0/18:3(9Z,12Z,15Z))', 'PI(22:1(11Z)/18:2(9Z,12Z))', 'PI(22:2(13Z,16Z)/18:1(9Z))']
918.547	152239	0.772665	0.256348
919.551	83356.8	0.779743	0.246437	C56H82O6S	[M+(37Cl)]-	919.55	0.95	['Sulfated Dihydromenaquinone-9']
919.628	20561.7	1.16467	0.691758	C49H93O13P	[M-H]-	919.628	-0.11	['PI(18:0/22:1(11Z))', 'PI(18:1(9Z)/22:0)', 'PI(19:1(9Z)/21:0)', 'PI(20:0/20:1(11Z))', 'PI(20:1(11Z)/20:0)', 'PI(21:0/19:1(9Z))', 'PI(22:0/18:1(9Z))', 'PI(22:1(11Z)/18:0)']
920.563	192194	0.801867	0.271748
921.566	104301	0.827	0.322718
922.579	195052	0.917139	0.602802
923.582	106939	0.896204	0.520963	C46H95O11PS	[M+K-2H]-	923.582	-0.03	['PGS']
924.596	93724.9	1.00466	0.969294	C48H84NO10P	[M+Hac-H]-	924.597	-1.71	['PS(20:1(11Z)/22:4(7Z,10Z,13Z,16Z))', 'PS(20:3(8Z,11Z,14Z)/22:2(13Z,16Z))', 'PS(20:4(5Z,8Z,11Z,14Z)/22:1(11Z))', 'PS(20:5(5Z,8Z,11Z,14Z,17Z)/22:0)', 'PS(22:0/20:5(5Z,8Z,11Z,14Z,17Z))', 'PS(22:1(11Z)/20:4(5Z,8Z,11Z,14Z))', 'PS(22:2(13Z,16Z)/20:3(8Z,11Z,14Z))', 'PS(22:4(7Z,10Z,13Z,16Z)/20:1(11Z))']
926.612	25824.7	1.14491	0.52034	C48H86NO10P	[M+Hac-H]-	926.613	-0.37	['PS(20:0/22:4(7Z,10Z,13Z,16Z))', 'PS(20:2(11Z,14Z)/22:2(13Z,16Z))', 'PS(20:3(8Z,11Z,14Z)/22:1(11Z))', 'PS(20:4(5Z,8Z,11Z,14Z)/22:0)', 'PS(22:0/20:4(5Z,8Z,11Z,14Z))', 'PS(22:1(11Z)/20:3(8Z,11Z,14Z))', 'PS(22:2(13Z,16Z)/20:2(11Z,14Z))', 'PS(22:4(7Z,10Z,13Z,16Z)/20:0)']
941.015	9421.97	0.408554	0.0884878
941.437	30789.6	0.456792	0.111253
943.648	30243.1	0.757093	0.0406814
944.652	17279.7	0.637055	0.00135327
954.567	15123	1.17516	0.64541
955.03	20748.6	0.509052	0.250213
957.52	9759.59	7.80799	3.83e-07
957.8	53132.1	1.08185	0.82762
958.804	33985.9	1.05374	0.889978
961.047	29011.1	0.664753	0.465882
963.419	20031.3	0.464652	0.067713
975.837	33783.9	1.24515	0.184955	C62H114O6	[M+Na-2H]-	975.836	0.72	['TG(15:0/22:0/22:3(10Z,13Z,16Z))[iso6]', 'TG(15:0/22:1(11Z)/22:2(13Z,16Z))[iso6]', 'TG(15:1(9Z)/22:0/22:2(13Z,16Z))[iso6]', 'TG(15:1(9Z)/22:1(11Z)/22:1(11Z))[iso3]', 'TG(16:0/21:0/22:3(10Z,13Z,16Z))[iso6]', 'TG(16:1(9Z)/21:0/22:2(13Z,16Z))[iso6]', 'TG(17:0/20:0/22:3(10Z,13Z,16Z))[iso6]', 'TG(17:0/20:1(11Z)/22:2(13Z,16Z))[iso6]', 'TG(17:0/20:2(11Z,14Z)/22:1(11Z))[iso6]', 'TG(17:0/20:2(11Z,14Z)/22…
975.837	33783.9	1.24515	0.184955	C64H112O6	[M-H]-	975.839	-1.75	['TG(17:0/22:0/22:6(4Z,7Z,10Z,13Z,16Z,19Z))[iso6]', 'TG(17:0/22:1(11Z)/22:5(7Z,10Z,13Z,16Z,19Z))[iso6]', 'TG(17:0/22:1(13Z)/22:5(7Z,10Z,13Z,16Z,19Z))[iso6]', 'TG(17:0/22:2(13Z,16Z)/22:4(7Z,10Z,13Z,16Z))[iso6]', 'TG(17:0/22:3(10Z,13Z,16Z)/22:3(10Z,13Z,16Z))[iso3]', 'TG(17:1(9Z)/22:0/22:5(7Z,10Z,13Z,16Z,19Z))[iso6]', 'TG(17:1(9Z)/22:1(11Z)/22:4(7Z,10Z,13Z,16Z))[iso6]', 'TG(17:1(9Z)/22:1(13Z)/22:4(7…
976.552	16608.4	0.674145	0.318015
978.567	61990	0.851924	0.592015
979.571	30598.7	0.853302	0.614113
982.844	36706.1	1.124	0.79757
984.518	19254.8	0.33406	0.0417438	C47H75NO17	[M+Hac-H]-	984.517	1.14	['Nystatin', 'Nystatin A1']
984.765	29365.7	1.03444	0.93528	C54H104NO8P	[M+Hac-H]-	984.764	1.72	['PC(23:1(9Z)/23:1(9Z))']
985.832	64463.9	1.08997	0.819895
986.78	61737.7	1.17597	0.649258	C54H106NO8P	[M+Hac-H]-	986.779	1.05	['PC(22:0/24:1(15Z))']
987.784	39276.9	1.15552	0.691758
1001.56	24014.5	0.517641	0.112448
1002.57	50533.7	0.518914	0.120301
1003.49	6614.78	5.40315	0.00195744
1003.57	32503.9	0.647409	0.204339
1003.87	33557.8	1.11921	0.548004	C64H118O6	[M+Na-2H]-	1003.87	1.83	['TG(17:0/22:0/22:3(10Z,13Z,16Z))[iso6]', 'TG(17:0/22:1(11Z)/22:2(13Z,16Z))[iso6]', 'TG(17:0/22:1(13Z)/22:2(13Z,16Z))[iso6]', 'TG(17:1(9Z)/22:0/22:2(13Z,16Z))[iso6]', 'TG(17:1(9Z)/22:1(11Z)/22:1(11Z))[iso3]', 'TG(17:1(9Z)/22:1(13Z)/22:1(13Z))[iso3]', 'TG(17:2(9Z,12Z)/22:0/22:1(11Z))[iso6]', 'TG(17:2(9Z,12Z)/22:0/22:1(13Z))[iso6]', 'TG(18:0/21:0/22:3(10Z,13Z,16Z))[iso6]', 'TG(18:1(9Z)/21:0/22:2(13…
1003.87	33557.8	1.11921	0.548004	C66H116O6	[M-H]-	1003.87	-0.56	['TG(19:0/22:0/22:6(4Z,7Z,10Z,13Z,16Z,19Z))[iso6]', 'TG(19:0/22:1(11Z)/22:5(7Z,10Z,13Z,16Z,19Z))[iso6]', 'TG(19:0/22:1(13Z)/22:5(7Z,10Z,13Z,16Z,19Z))[iso6]', 'TG(19:0/22:2(13Z,16Z)/22:4(7Z,10Z,13Z,16Z))[iso6]', 'TG(19:0/22:3(10Z,13Z,16Z)/22:3(10Z,13Z,16Z))[iso3]', 'TG(19:1(9Z)/22:0/22:5(7Z,10Z,13Z,16Z,19Z))[iso6]', 'TG(19:1(9Z)/22:1(11Z)/22:4(7Z,10Z,13Z,16Z))[iso6]', 'TG(19:1(9Z)/22:2(13Z,16Z)/22…
1004.87	21231.3	1.1037	0.631812
1005.59	29161.5	0.82376	0.628134
1005.65	25953.5	1.35135	0.3704
1006.75	27233.7	0.916388	0.825258
1008.77	57599	1.2487	0.654912
1010.78	198119	1.11421	0.74756
1011.78	126273	1.10444	0.778371
1012.8	116944	1.13901	0.69294
1013.8	80210.2	1.15833	0.653658
1013.86	45515.9	1.12638	0.712978
1014.81	134612	1.17353	0.625926
1014.87	28689.7	1.20616	0.602492
1015.82	90876.3	1.17314	0.62352
1016.73	18694.5	0.338123	0.0411367
1017.85	27556.4	1.88809	0.065064
1018.75	15192.8	0.436503	0.0917254
1019.78	15696.3	0.799176	0.671131	C65H108O6	[M+Cl]-	1019.78	-1.06	['TG(18:0/22:3(10Z,13Z,16Z)/22:6(4Z,7Z,10Z,13Z,16Z,19Z))[iso6]', 'TG(18:0/22:4(7Z,10Z,13Z,16Z)/22:5(7Z,10Z,13Z,16Z,19Z))[iso6]', 'TG(18:1(9Z)/22:2(13Z,16Z)/22:6(4Z,7Z,10Z,13Z,16Z,19Z))[iso6]', 'TG(18:1(9Z)/22:3(10Z,13Z,16Z)/22:5(7Z,10Z,13Z,16Z,19Z))[iso6]', 'TG(18:1(9Z)/22:4(7Z,10Z,13Z,16Z)/22:4(7Z,10Z,13Z,16Z))[iso3]', 'TG(18:2(9Z,12Z)/22:1(11Z)/22:6(4Z,7Z,10Z,13Z,16Z,19Z))[iso6]', 'TG(18:2(9Z,1…
1023.44	35690.7	0.434956	0.0641298
1024.45	17998.6	0.444563	0.0710584
1024.8	26825.8	1.40727	0.421997
1032.77	128007	0.97934	0.95368
1033.77	83235.3	0.996072	0.992157
1034.78	178558	0.991109	0.979233
1036.8	240061	1.04513	0.903969
1037.8	161135	1.04339	0.907825
1038.81	285467	1.06556	0.864515
1039.82	189610	1.05684	0.886412
1039.88	16122	0.9754	0.954608
1041.83	93634.3	1.10325	0.766795
1041.9	35910.6	1.15702	0.66769
1042.9	23949.5	1.07343	0.86961
1043.85	63904.1	1.14602	0.668527
1045.88	43774.8	1.56675	0.162388
1046.88	28910	1.62556	0.164403
1047.66	131897	1.13752	0.743589
1048.67	76747.5	1.14233	0.736764
1056.77	11505.9	2.36882	0.0298106
1058.78	38437.1	0.912427	0.71494
1059.79	27040.8	0.912627	0.697556
1060.8	134091	0.958836	0.907825
1061.58	14376.1	0.66961	0.361504
1061.8	91750.2	0.96086	0.913478
1062.81	164599	0.956071	0.907825
1063.82	113439	0.953366	0.901245
1064.83	171468	1.02191	0.95278
1065.83	116613	1.01737	0.961726
1066.52	10376.5	0.272982	0.0320803
1066.85	94992.1	1.06315	0.864515
1067.85	62600	1.06735	0.855695
1068.17	24326.2	0.849709	0.380796
1068.67	27552.6	1.25514	0.361504
1069.18	31545.5	0.90385	0.590609
1069.68	23590	0.91338	0.737689
1070.18	18410.9	0.791349	0.270017
1082.56	23948.1	0.556363	0.142971
1082.75	63509.1	0.085621	0.0307472
1083.64	18091.7	2.3209	0.0316644
1083.76	40879.7	0.0965792	0.0356091
1087.24	9585.44	0.857986	0.625926
1097.23	17970	0.880407	0.295247
1097.73	23846.3	0.879051	0.469183
1098.23	33586.3	0.941849	0.64541
1098.73	38710.1	0.878173	0.339896
1099.24	39841.5	0.916091	0.505851
1099.74	40755	0.930464	0.600738
1101.76	15614.4	0.801391	0.352459
1107.68	19148.7	1.22631	0.610563
1111.24	15811	0.496516	0.0494486
1113.25	10963.5	0.628032	0.208159
1125.64	13815.2	11.1637	0.000509043
1126.7	8509.9	0.326154	0.00929856
1142.58	9290.88	0.693329	0.449392
1166.58	14367.5	0.52738	0.147572
1200.74	46571.2	0.928862	0.833656
1201.74	33700.4	0.942247	0.864515
1203.76	18949.9	0.804844	0.611513
1219.86	23761.5	15.0015	0.000553777
1220.86	18297.5	14.6386	0.000565171
1222.72	22169.9	0.773966	0.506077
1223.73	14868.6	0.682408	0.396174
1225.74	26319.4	0.840224	0.610232	C60H110N2O23	[M-H]-	1225.74	0.14	['NA']
1226.75	44489.5	0.852407	0.635341
1227.76	32149.3	0.872615	0.675883
1228.77	29330	0.942339	0.864515
1229.78	10258.4	0.250224	0.0157714
1243.76	14032.8	0.883648	0.705223
1248.58	14531	0.600276	0.245812
1255.83	11779.8	0.104873	0.00014934
1256.83	9154.76	0.163188	0.000891936
1385.82	101156	80.9282	0.00125716
1386.83	98207.1	78.5689	0.000513809
1392.94	12317.2	0.10148	1.13e-08
1393.94	10487.6	0.119183	1.67e-08
1399.01	46325.7	0.952493	0.755674
1401.82	25060.1	20.0489	0.000261522
1408.94	66299.2	0.414637	5.08e-05
1409.94	44820.6	0.308253	0.0025637
1413.89	10626.6	0.515115	0.0617302
1417.08	4558.86	0.387575	0.00395847
1422.95	16942.1	3.6915	0.00262218
1424.96	36658.7	1.36601	0.164403
1426.03	21960.6	1.08305	0.75145
1426.98	119233	0.980247	0.891708
1427.99	96825.5	0.988414	0.936454
1428.99	56827.8	1.25469	0.455178
1430	33439.1	1.47951	0.238282
1431.92	61980.8	0.389409	0.000113937
1432.94	137300	0.3895	5.92e-05
1434.95	87136.4	1.94751	0.307565
1435.95	186840	0.408275	8.05e-05
1436.96	175302	0.425426	6.14e-05
1437.97	110236	0.444618	8.6e-05
1438.98	65435.8	0.571363	0.0292162
1439.91	163752	0.819018	0.147493
1440.91	143158	0.820805	0.170523
1441.09	13333.3	0.182234	0.000426672
1441.92	215537	0.82744	0.195517
1442.93	162211	0.824982	0.19199
1443.94	133098	0.845628	0.259883
1444.1	9740.97	0.169728	0.000142279
1444.94	90339.5	0.85557	0.269082
1451.98	134598	0.892426	0.597515
1452.99	130926	0.850918	0.401353
1454	91096.3	0.949887	0.79021
1455.01	99918.8	0.922918	0.667038
1456.01	73961	0.938444	0.729116
1456.93	18774.6	0.0937806	7.08e-05
1457.94	14844	0.0842059	8.67e-05
1461.89	22726	0.321458	0.0206973
1462.9	32386.7	0.903903	0.698009
1464.91	36261	0.914655	0.743589
1469.05	34711.6	0.316615	0.00345529
1472.96	101789	0.768859	0.364944
1473.08	39561.1	0.411111	0.000844721
1473.97	70615.7	1.25182	0.634104
1474.98	180368	0.734198	0.17792
1475.98	83612.1	2.03729	0.231492
1476.99	216979	0.74901	0.171061
1478	94482	2.47997	0.147867
1481.07	10374.5	0.118891	0.000147277
1485.08	9909.46	0.237741	0.00214026
1487	22431.6	0.391347	0.0141696
1490.03	60076.2	0.419012	0.00427749
1491.03	50526.4	0.399136	0.00395847
1492.04	115308	0.445159	0.00118505
1493.05	98305.4	0.45249	0.00123624
1494.06	184820	0.436983	0.000495956
1495.06	153259	0.43116	0.0003637
1496.07	193721	0.430796	0.000280873
1497.08	148242	0.437217	0.000263795
1498.09	148780	0.440201	0.000263795
1499.1	110826	0.45452	0.00036281
1501.11	52160.9	0.409491	0.000349879
1508.98	27191.8	0.951597	0.832573
1510.09	12627.3	0.213599	0.000362165
1511	82668.6	0.669005	0.184211
1516.04	91433.1	0.0136499	0.000111755
1517.05	123200	0.543022	0.00265344
1518.06	188322	0.443907	0.000586436
1519.06	155321	0.451007	0.000690839
1520.07	210173	0.438859	0.000381154
1521.08	167862	0.453672	0.000408311
1523.1	121485	0.341833	0.000261522
1524.1	100600	0.314264	0.000266228
1533.99	58080.4	0.897595	0.52034
1535	51974.4	0.144892	0.00169735
1536	78925.8	0.934181	0.668527
1537.02	112875	0.981828	0.901245
1538.02	88277.3	0.983707	0.914736
1539.03	76670.9	1.06677	0.743589
1544.07	23956.8	0.192217	5.97e-05
1548.11	16799.6	0.0744034	6.59e-07
1568.1	33316.8	1.01316	0.952351
1572.13	73565.9	1.18623	0.30615
1577.17	14328.7	0.339541	0.00770784
1584.13	12991.9	2.53231	0.0318119
1594.11	72134.5	1.13636	0.446255
1595.12	63243.5	1.20361	0.378618
1596.13	101337	1.15131	0.403196
1597.13	83172.9	1.22228	0.343705
1599.15	79001.9	1.19591	0.281991
1618.11	16605.4	0.897753	0.75707
1621.13	14732.1	0.744135	0.415668
1622.14	24506.7	1.0297	0.909731
1624.16	18222.3	0.58599	0.156581
a	Average intensity across all samples (n=9 control and n=9 air-exposed samples).
b	Fold change in intensity from control to air-exposed group.
c	From t-test between control and air-exposed groups with a false discovery rate (FDR) of 5% to correct for multiple hypothesis testing.
d	Calculated for the specified ion form of the empirical formula.
e	Error between the observed and theoretical masses, presented as parts per million of the theoretical mass.
