# Supplementary material for: Defining the Baseline and Oxidant Perturbed Lipidomic Profiles of Daphnia magna
Source: Metabolites. 2017 Mar 15;7(1):11. doi: 10.3390/metabo7010011 (PMC5372214; doi:10.3390/metabo7010011)
Supplement: Supplementary file 1 [file metabolites-07-00011-s001.zip › Table S5.xlsx]

## Sheet: Sheet1
Table S5 Annotated baseline lipidome of D. magna. * Indicates confirmation of structure based on bulk fragmentation
Theoretical mass (m/z)		Identification
Measured	Neutral		Ion form	Headgroup	Annotation
436.283	437.291		[M-H]-	PE	LPE(P-16:0e)
450.263	451.27		[M-H]-	PE	LPE(16:1)
452.278	393.264		[M-H]-	PE	LPE(16:0)
466.33	467.338		[M-H]-	PE	LPE(O-18:0)
474.263	475.27		[M-H]-	PE	LPE(18:3)
476.278	477.286		[M-H]-	PE	LPE(18:2)
478.294	479.301		[M-H]-	PE	LPE(18:1)
479.314	480.322		[M-H]-	PA	LPA(21:0,0:0)
480.31	481.317		[M-H]-	PE	LPE(18:0)
492.346	493.353		[M-H]-	PE	LPE(P-20:0)
495.309	496.317		[M-H]-	PG	LPG(P-18:0)
498.263	499.27		[M-H]-	PE	LPE(20:5)
500.278	501.286		[M-H]-	PE	LPE(20:4)
502.294	503.301		[M-H]-	PE	LPE(20:3)
504.31	505.317		[M-H]-	PE	LPE(20:2)
509.325	450.311		[M+Ac]-	PA	LPA(P-20:0,0:0)
554.346	495.332		[M+Ac]-	PC	LPC(16:0)*
			[M+Ac]-	PE	LPE(19:0)
562.315	503.301		[M+Ac]-	PE	LPE(20:3)
564.331	505.317		[M+Ac]-	PE	LPE(20:2)
			[M+Ac]-	PC	LPC(17:2)
576.331	517.317		[M+Ac]-	PC	LPC(18:3)*
			[M-H]-	PS	LPS(22:2)*
578.346	519.332		[M+Ac]-	PC	LPC(18:2)*
			[M-H]-	PS	LPS(22:1)
580.362	521.348		[M+Ac]-	PC	LPC(18:1)*
			[M-H]-	PS	LPS(22:0)
684.461	685.468		[M-H]-	PE	PE(32:3)
686.477	687.484		[M-H]-	PE	PE(32:2)
688.492	689.5		[M-H]-	PE	PE(32:1)
694.482	695.489		[M-H]-	PE	PE(P-34:4)
696.461	697.468		[M-H]-	PE	PE(33:4)
696.497	697.505		[M-H]-	PE	PE(P-34:3)/PE(O-34:4)
697.409	638.395		[M+Ac]-	PA	PA(32:5)
698.513	699.52		[M-H]-	PE	PE(P-34:2)/PE(O-34:3)
700.529	701.536		[M-H]-	PE	PE(P-34:1)/PE(O-34:2)
709.481	710.489		[M-H]-	PA	PA(37:4)
710.477	711.484		[M-H]-	PE	PE(34:4)
712.492	713.5		[M-H]-	PE	PE(34:3)
714.508	715.515		[M-H]-	PE	PE(34:2)
716.524	717.531		[M-H]-	PE	PE(34:1)
717.471	658.457		[M+Ac]-	PA	PA(33:2)
			[M-H]-	PG	PG(32:2)
718.539	719.547		[M-H]-	PE	PE(34:0)
719.487	660.473		[M+Ac]-	PA	PA(33:1)
			[M-H]-	PG	PG(32:1)
720.497	721.505		[M-H]-	PE	PE(P-36:5)
721.481	722.489		[M-H]-	PA	PA(38:5)
721.503	662.489		[M+Ac]-	PA	PA(33:0)
			[M-H]-	PG	PG(32:0)
722.513	723.52		[M-H]-	PE	PE(P-36:4)/PE(O-36:5)
723.497	724.504		[M-H]-	PA	PA(38:4)
724.492	725.5		[M-H]-	PE	PE(35:4)
724.529	725.536		[M-H]-	PE	PE(P-36:3)/PE(O-36:4)
726.508	727.515		[M-H]-	PE	PE(35:3)
726.544	727.552		[M-H]-	PE	PE(P-36:2)/PE(O-36:3)
728.524	729.531		[M-H]-	PE	PE(35:2)
728.56	729.567		[M-H]-	PE	PE(P-36:1)/PE(O-36:2)
730.539	731.547		[M-H]-	PE	PE(35:1)
730.576	731.583		[M-H]-	PE	PE(P-36:0)/PE(O-36:1)
733.503	674.489		[M+Ac]-	PA	PA(34:1)
			[M-H]-	PG	PG(33:1)
734.477	735.484		[M-H]-	PE	PE(36:6)
735.482	676.468		[M+Ac]-	PG	PG(P-30:1)
736.477	677.463		[M+Ac]-	PS	PS(P-29:0)
736.492	737.5		[M-H]-	PE	PE(36:5)
736.513	677.5		[M+Ac]-	PC	PC(28:0)
			[M+Ac]-	PE	PE(31:0)
737.497	678.484		[M+Ac]-	PG	PG(P-30:0)/PG(O-30:1)
738.493	679.479		[M+Ac]-	PS	PS(O-29:0)
738.508	739.515		[M-H]-	PE	PE(36:4)
739.513	680.499		[M+Ac]-	PG	PG(O-30:0)
740.524	741.531		[M-H]-	PE	PE(36:3)
741.471	682.457		[M+Ac]-	PA	PA(35:4)
			[M-H]-	PG	PG(34:4)
741.544	742.551		[M-H]-	PA	PA(39:2)
742.539	683.525		[M-H]-	PE	PE(36:2)
743.487	684.473		[M+Ac]-	PA	PA(35:3)
			[M-H]-	PG	PG(34:3)
744.555	745.562		[M-H]-	PE	PE(36:1)
745.503	686.489		[M-H]-	PA	LBPA(34:2)
			[M-H]-	PG	PG(34:2)
			[M+Ac]-	PA	PA(35:2)
747.518	688.504		[M-H]-	PA	LBPA(34:1)
			[M-H]-	PG	PG(34:1)
			[M+Ac]-	PA	PA(35:1)
748.492	749.5		[M-H]-	PE	PE(37:6)
749.534	690.52		[M+Ac]-	PA	PA(35:0)
			[M-H]-	PG	PG(34:0)
750.508	751.515		[M-H]-	PE	PE(37:5)
750.544	751.552		[M-H]-	PE	PE(P-38:4)/PE(O-38:5)
751.513	692.499		[M+Ac]-	PG	PG(P-31:0)/PG(O-31:1)
752.524	753.531		[M-H]-	PE	PE(37:4)
752.56	753.567		[M-H]-	PE	PE(P-38:3)/PE(O-38:4)
754.503	695.489		[M+Ac]-	PE	PE(P-34:4)
754.539	755.547		[M-H]-	PE	PE(37:3)
754.576	755.583		[M-H]-	PE	PE(P-38:2)/PE(O-38:3)
756.482	697.468		[M+Ac]-	PE	PE(33:4)
			[M+Ac]-	PC	PC(30:4)
			[M-H]-	PS	PS(34:3)
756.519	697.505		[M-H]-	PS	PS(P-35:2)
			[M+Ac]-	PE	PE(P-34:3)/PE(O-34:4)
756.555	757.562		[M-H]-	PE	PE(37:2)
756.591	757.599		[M-H]-	PE	PE(P-38:1)/PE(O-38:2)
758.477	759.484		[M-H]-	PE	PE(38:8)
758.571	759.578		[M-H]-	PE	PE(37:1)
758.607	759.614		[M-H]-	PE	PE(P-38:0)/PE(O-38:1)
760.492	761.5		[M-H]-	PE	PE(38:7)
762.508	763.515		[M-H]-	PE	PE(38:6)
763.513	704.499		[M+Ac]-	PG	PG(P-32:1)
764.508	705.494		[M+Ac]-	PS	PS(P-31:0)/PS(O-31:1)
764.524	765.531		[M-H]-	PE	PE(38:5)
765.471	706.457		[M+Ac]-	PA	PA(37:6)
			[M-H]-	PG	PG(36:6)
765.529	706.515		[M+Ac]-	PG	PG(32:0)/PG(O-32:1)
766.539	767.547		[M-H]-	PE	PE(38:4)
767.487	708.473		[M+Ac]-	PA	PA(37:5)
			[M-H]-	PG	PG(36:5)
767.508	708.494		[M+Ac]-	PG	PG(31:0)
			[M-H]-	PI	PI(O-30:0)
767.544	708.531		[M+Ac]-	PG	PG(O-32:0)
768.555	769.562		[M-H]-	PE	PE(38:3)
769.503	710.489		[M+Ac]-	PA	PA(37:4)
			[M-H]-	PG	PG(36:4)
770.498	711.484		[M+Ac]-	PE	PE(34:4)
			[M+Ac]-	PC	PC(31:4)
			[M-H]-	PS	PS(35:3)*
771.518	712.504		[M+Ac]-	PA	PA(37:3)
			[M-H]-	PG	PG(36:3)
772.513	713.5		[M+Ac]-	PE	PE(34:3)
			[M+Ac]-	PC	PC(31:3)
			[M-H]-	PS	PS(35:2)*
772.55	713.536		[M+Ac]-	PC	PC(O-34:3)*
			[M-H]-	PS	PS(P-36:1)/PS(O-36:2)
			[M+Ac]-	PE	PE(P-35:2)
773.534	714.52		[M-H]-	PA	LBPA(36:2)
			[M-H]-	PG	PG(36:2)
			[M+Ac]-	PA	PA(37:2)
776.545	717.531		[M+Ac]-	PE	PE(34:1)
			[M+Ac]-	PC	PC(31:1)*
			[M-H]-	PS	PS(35:0)
778.503	779.51		[M-H]-	PE	PE(38:6)-OH
780.482	721.468		[M-H]-	PS	PS(36:5)*
			[M+Ac]-	PE	PE(35:6)
780.555	781.562		[M-H]-	PE	PE(39:4)
781.487	782.495		[M-H]-	PI	PI(30:0)
782.498	723.484		[M+Ac]-	PC	PC(32:5)*
			[M+Ac]-	PE	PE(35:5)
			[M-H]-	PS	PS(36:4)*
786.529	727.515		[M+Ac]-	PE	PE(35:3)
			[M+Ac]-	PC	PC(32:3)*
			[M-H]-	PS	PS(36:2)*
787.513	728.499		[M+Ac]-	PG	PG(P-34:3)/PG(O-34:4)
788.524	729.51		[M-H]-	PE	PE(40:7)
788.545	729.531		[M+Ac]-	PE	PE(35:2)
			[M+Ac]-	PC	PC(32:2)*
			[M-H]-	PS	PS(36:1)*
789.529	730.515		[M+Ac]-	PG	PG(P-34:2)/PG(O-34:3)
790.539	731.525		[M-H]-	PE	PE(40:6)
790.56	731.547		[M+Ac]-	PE	PE(35:1)
			[M+Ac]-	PC	PC(32:1)*
			[M-H]-	PS	PS(36:0)
791.544	732.531		[M+Ac]-	PG	PG(P-34:1)/PG(O-34:2)
791.617	732.603		[M+Ac]-	PA	PA(O-39:0)
			[M-H]-	PG	PG(O-38:0)
792.555	793.562		[M-H]-	PE	PE(40:5)
792.576	733.562		[M+Ac]-	PE	PE(35:0)
			[M+Ac]-	PC	PC(32:0)*
793.56	734.546		[M+Ac]-	PG	PG(P-34:0)/PG(O-34:1)
794.571	795.578		[M-H]-	PE	PE(40:4)
796.513	737.5		[M+Ac]-	PC	PC(33:5)*
			[M-H]-	PS	PS(37:4)*
			[M+Ac]-	PE	PE(36:5)
796.55	737.536		[M-H]-	PS	PS(P-38:3)/PS(O-38:4)
			[M+Ac]-	PC	PC(P-34:4)
796.586	797.593		[M-H]-	PE	PE(40:3)
798.529	739.515		[M+Ac]-	PE	PE(36:4)
			[M+Ac]-	PC	PC(33:4)
			[M-H]-	PS	PS(37:3)
798.565	739.552		[M+Ac]-	PC	PC(P-34:3)/PC(O-34:4)
			[M-H]-	PS	PS(P-38:2)/PS(O-38:3)
798.602	799.609		[M-H]-	PE	PE(40:2)
800.545	741.531		[M+Ac]-	PE	PE(36:3)
			[M+Ac]-	PC	PC(33:3)*
			[M-H]-	PS	PS(37:2)
800.581	741.567		[M+Ac]-	PC	PC(P-34:2)/PC(O-34:3)*
			[M-H]-	PS	PS(P-38:1)/PS(O-38:2)
			[M+Ac]-	PE	PE(P-37:2)
802.466	803.474		[M-H]-	PS	PS(38:8)
802.56	743.547		[M+Ac]-	PE	PE(36:2)
			[M+Ac]-	PC	PC(33:2)*
			[M-H]-	PS	PS(37:1)
802.597	743.583		[M+Ac]-	PC	PC(P-34:1)/PC(O-34:2)*
			[M-H]-	PS	PS(P-38:0)/PS(O-38:1)
			[M+Ac]-	PE	PE(P-37:1)/PE(O-37:2)
803.472	804.479		[M-H]-	PI	PI(32:3)
804.576	745.562		[M+Ac]-	PE	PE(36:1)
			[M+Ac]-	PC	PC(33:1)*
			[M-H]-	PS	PS(37:0)
804.612	745.599		[M+Ac]-	PC	PC(P-34:0)/PC(O-34:1)*
			[M-H]-	PS	PS(O-38:0)
			[M+Ac]-	PE	PE(P-37:0)/PE(O-37:1)
806.534	747.52		[M-H]-	PE	PE(40:6)
			[M+Ac]-	PE	PE(O-38:7)
808.513	749.5		[M+Ac]-	PE	PE(37:6)
			[M+Ac]-	PC	PC(34:6)*
			[M-H]-	PS	PS(38:5)*
808.55	749.536		[M+Ac]-	PE	PE(P-38:5)/PE(O-38:6)
810.529	751.515		[M+Ac]-	PE	PE(37:5)
			[M+Ac]-	PC	PC(34:5)*
			[M-H]-	PS	PS(38:4)*
810.565	751.552		[M+Ac]-	PE	PE(P-38:4)/PE(O-38:5)
810.638	811.645		[M-H]-	PE	PE(P-42:2)
812.545	753.531		[M+Ac]-	PE	PE(37:4)
			[M+Ac]-	PC	PC(34:4)*
			[M-H]-	PS	PS(38:3)*
812.581	753.567		[M+Ac]-	PC	PC(O-35:4)
			[M+Ac]-	PE	PE(P-38:3)/PE(O-38:4)
812.654	813.661		[M-H]-	PE	PE(P-42:1)/PE(O-42:2)
814.56	755.547		[M+Ac]-	PE	PE(37:3)
			[M+Ac]-	PC	PC(34:3)*
			[M-H]-	PS	PS(38:2)
814.67	815.677		[M-H]-	PE	PE(P-42:0)/PE(O-42:1)
816.576	757.562		[M+Ac]-	PE	PE(37:2)
			[M+Ac]-	PC	PC(34:2)*
			[M-H]-	PS	PS(38:1)*
817.56	758.546		[M+Ac]-	PG	PG(P-36:2)/PG(O-36:3)
818.498	759.484		[M+Ac]-	PE	PE(38:8)
			[M-H]-	PS	PS(39:7)
818.592	759.578		[M+Ac]-	PE	PE(37:1)
			[M+Ac]-	PC	PC(34:1)*
			[M-H]-	PS	PS(38:0)
822.529	763.515		[M+Ac]-	PE	PE(38:6)
			[M+Ac]-	PC	PC(35:6)*
			[M-H]-	PS	PS(39:5)
824.545	765.531		[M+Ac]-	PE	PE(38:5)
			[M+Ac]-	PC	PC(35:5)*
			[M-H]-	PS	PS(39:4)
824.617	825.625		[M-H]-	PE	PE(42:3)
825.456	826.463		[M-H]-	PI	PI(34:6)
826.466	827.474		[M-H]-	PS	PS(40:10)*
826.56	767.547		[M+Ac]-	PE	PE(38:4)
			[M+Ac]-	PC	PC(35:4)*
			[M-H]-	PS	PS(39:3)
827.472	828.479		[M-H]-	PI	PI(34:5)
828.576	769.562		[M+Ac]-	PE	PE(38:3)
			[M+Ac]-	PC	PC(35:3)*
			[M-H]-	PS	PS(39:2)
829.487	830.495		[M-H]-	PI	PI(34:4)
830.592	771.578		[M+Ac]-	PE	PE(38:2)
			[M+Ac]-	PC	PC(35:2)*
			[M-H]-	PS	PS(39:1)
832.571	773.557		[M+Ac]-	PS	PS(P-36:1)/PS(O-36:2)
832.607	773.593		[M+Ac]-	PE	PE(38:1)
			[M+Ac]-	PC	PC(35:1)*
			[M-H]-	PS	PS(39:0)
832.644	773.63		[M+Ac]-	PC	PC(P-36:0)/PC(O-36:1)*
			[M-H]-	PS	PS(O-40:0)*
			[M+Ac]-	PE	PE(P-39:0)/PE(O-39:1)
834.565	775.552		[M+Ac]-	PE	PE(P-40:6)
836.545	777.531		[M+Ac]-	PE	PE(39:6)
			[M+Ac]-	PC	PC(36:6)*
			[M-H]-	PS	PS(40:5)
838.539	839.547		[M-H]-	PE	PE(44:10)
838.56	779.547		[M+Ac]-	PE	PE(39:5)
			[M+Ac]-	PC	PC(36:5)*
			[M-H]-	PS	PS(40:4)
839.544	780.531		[M+Ac]-	PG	PG(P-38:5)/PG(O-38:6)
840.576	781.562		[M+Ac]-	PE	PE(39:4)
			[M+Ac]-	PC	PC(36:4)*
			[M-H]-	PS	PS(40:3)
841.524	782.51		[M+Ac]-	PG	PG(37:5)
			[M-H]-	PI	PI(P-36:4)/PI(O-36:5)
842.498	783.484		[M+Ac]-	PE	PE(40:10)
842.592	783.578		[M+Ac]-	PE	PE(39:3)
			[M+Ac]-	PC	PC(36:3)*
			[M-H]-	PS	PS(40:2)
843.503	844.51		[M-H]-	PI	PI(35:4)
844.607	785.593		[M+Ac]-	PE	PE(39:2)
			[M+Ac]-	PC	PC(36:2)*
			[M-H]-	PS	PS(40:1)
845.591	786.577		[M+Ac]-	PG	PG(P-38:2)/PG(O-38:3)
847.534	848.541		[M-H]-	PI	PI(35:2)
850.56	791.547		[M+Ac]-	PE	PE(40:6)
			[M+Ac]-	PC	PC(37:6)*
			[M-H]-	PS	PS(41:5)
852.54	793.526		[M+Ac]-	PS	PS(P-38:5)/PS(O-38:6)
852.576	793.562		[M+Ac]-	PE	PE(40:5)
			[M+Ac]-	PC	PC(37:5)*
			[M-H]-	PS	PS(41:4)
853.487	854.495		[M-H]-	PI	PI(36:6)
854.555	795.541		[M+Ac]-	PS	PS(P-38:4)/PS(O-38:5)
854.592	795.578		[M+Ac]-	PE	PE(40:4)
			[M+Ac]-	PC	PC(37:4)*
			[M-H]-	PS	PS(41:3)
855.503	856.51		[M-H]-	PI	PI(36:5)
855.56	796.547		[M+Ac]-	PI	PI(O-32:0)
856.571	797.557		[M+Ac]-	PC	PC(36:4)-OH
			[M+Ac]-	PS	PS(P-38:3)/PS(O-38:4)
856.607	797.593		[M+Ac]-	PE	PE(40:3)
			[M+Ac]-	PC	PC(37:3)*
			[M-H]-	PS	PS(41:2)
857.519	858.526		[M-H]-	PI	PI(36:4)
858.587	799.573		[M+Ac]-	PS	PS(P-38:2)/PS(O-38:3)
858.623	799.609		[M+Ac]-	PE	PE(40:2)
			[M+Ac]-	PC	PC(37:2)*
			[M-H]-	PS	PS(41:1)
863.566	864.573		[M-H]-	PI	PI(36:1)
864.576	805.562		[M+Ac]-	PE	PE(41:6)
			[M+Ac]-	PC	PC(38:6)*
			[M-H]-	PS	PS(42:5)
865.581	866.588		[M-H]-	PI	PI(36:0)
866.555	807.541		[M+Ac]-	PE	PE(40:6)-OH
866.592	807.578		[M+Ac]-	PE	PE(41:5)
			[M+Ac]-	PC	PC(38:5)*
			[M-H]-	PS	PS(42:4)
867.56	808.547		[M+Ac]-	PI	PI(P-33:0)/PI(O-33:1)
868.607	809.593		[M+Ac]-	PE	PE(41:4)
			[M+Ac]-	PC	PC(38:4)*
			[M-H]-	PS	PS(42:3)
869.519	870.526		[M-H]-	PI	PI(37:5)
869.576	810.562		[M+Ac]-	PI	PI(O-33:0)
870.623	811.609		[M+Ac]-	PE	PE(41:3)
			[M+Ac]-	PC	PC(38:3)*
			[M-H]-	PS	PS(42:2)
871.534	872.541		[M-H]-	PI	PI(37:4)
872.639	813.625		[M+Ac]-	PE	PE(41:2)
			[M+Ac]-	PC	PC(38:2)
			[M-H]-	PS	PS(42:1)
874.581	815.568		[M+Ac]-	PS	PS(38:2)
877.581	878.588		[M-H]-	PI	PI(37:1)
878.592	819.578		[M+Ac]-	PE	PE(42:6)
			[M+Ac]-	PC	PC(39:6)
879.503	880.51		[M-H]-	PI	PI(38:7)
879.597	880.604		[M-H]-	PI	PI(37:0)
880.571	821.557		[M+Ac]-	PS	PS(P-40:5)/PS(O-40:6)
880.607	821.593		[M+Ac]-	PE	PE(42:5)
			[M+Ac]-	PC	PC(39:5)
			[M-H]-	PS	PS(43:4)
881.519	882.526		[M-H]-	PI	PI(38:6)
882.587	823.573		[M+Ac]-	PE	PE(38:4)15ke
			[M+Ac]-	PS	PS(P-40:4)/PS(O-40:5)
882.623	823.609		[M+Ac]-	PE	PE(42:4)
			[M+Ac]-	PC	PC(39:4)
883.534	884.541		[M-H]-	PI	PI(38:5)
884.639	825.625		[M+Ac]-	PE	PE(42:3)
			[M+Ac]-	PC	PC(39:3)*
			[M-H]-	PS	PS(43:2)
885.55	886.557		[M-H]-	PI	PI(38:4)
889.581	890.588		[M-H]-	PI	PI(38:2)
890.519	831.505		[M+Ac]-	PS	PS(40:8)
891.597	892.604		[M-H]-	PI	PI(38:1)
894.55	835.536		[M+Ac]-	PS	PS(40:6)
894.623	835.609		[M+Ac]-	PC	PC(40:5)*
			[M-H]-	PS	PS(44:4)
896.639	837.625		[M+Ac]-	PE	PE(43:5)
			[M+Ac]-	PC	PC(40:4)*
			[M-H]-	PS	PS(44:3)
898.581	839.568		[M+Ac]-	PS	PS(40:4)
898.654	839.64		[M+Ac]-	PC	PC(40:3)*
			[M-H]-	PS	PS(44:2)
900.597	841.583		[M+Ac]-	PS	PS(40:3)
901.545	842.531		[M+Ac]-	PI	PI(P-36:4)/PI(O-36:5)
903.56	844.547		[M+Ac]-	PI	PI(P-36:3)/PI(O-36:4
908.566	849.552		[M+Ac]-	PS	PS(41:6)
908.602	849.588		[M+Ac]-	PS	PS(O-42:6)
910.581	851.568		[M+Ac]-	PS	PS(41:5)
919.628	920.635		[M-H]-	PI	PI(40:1)
920.566	861.552		[M+Ac]-	PS	PS(42:7)
922.581	863.568		[M+Ac]-	PS	PS(42:6)
924.597	865.583		[M+Ac]-	PS	PS(42:5)
926.613	867.599		[M+Ac]-	PS	PS(42:4)
926.686	867.672		[M+Ac]-	PC	PC(42:3)
929.576	870.562		[M+Ac]-	PI	PI(P-38:4)/PI(O-38:5)
938.686	879.672		[M+Ac]-	PC	PC(43:4)
939.524	880.51		[M+Ac]-	PI	PI(38:7)
945.644	946.651		[M-H]-	PI	PI(42:2)
946.581	887.568		[M+Ac]-	PS	PS(44:8)
950.613	891.599		[M+Ac]-	PS	PS(44:6)
965.54	906.526		[M+Ac]-	PI	PI(40:8)

## Sheet: Sheet2
436.283
450.263
452.278
466.33
474.263
476.278
478.294
479.314
480.31
492.346
495.309
498.263
500.278
502.294
504.31
509.325
554.346
562.315
564.331
576.331
578.346
580.362
684.461
686.477
688.492
694.482
696.461
696.497
697.409
698.513
700.529
709.481
710.477
712.492
714.508
716.524
717.471
718.539
719.487
720.497
721.481
721.503
722.513
723.497
724.492
724.529
726.508
726.544
728.524
728.56
730.539
730.576
733.503
734.477
735.482
736.477
736.492
736.513
737.497
738.493
738.508
739.513
740.524
741.471
741.544
742.539
743.487
744.555
745.503
747.518
748.492
749.534
750.508
750.544
751.513
752.524
752.56
754.503
754.539
754.576
756.482
756.519
756.555
756.591
758.477
758.571
758.607
760.492
762.508
763.513
764.508
764.524
765.471
765.529
766.539
767.487
767.508
767.544
768.555
769.503
770.498
771.518
772.513
772.55
773.534
776.545
778.503
780.482
780.555
781.487
782.498
786.529
787.513
788.524
788.545
789.529
790.539
790.56
791.544
791.617
792.555
792.576
793.56
794.571
796.513
796.55
796.586
798.529
798.565
798.602
800.545
800.581
802.466
802.56
802.597
803.472
804.576
804.612
806.534
808.513
808.55
810.529
810.565
810.638
812.545
812.581
812.654
814.56
814.67
816.576
817.56
818.498
818.592
822.529
824.545
824.617
825.456
826.466
826.56
827.472
828.576
829.487
830.592
832.571
832.607
832.644
834.565
836.545
838.539
838.56
839.544
840.576
841.524
842.498
842.592
843.503
844.607
845.591
847.534
850.56
852.54
852.576
853.487
854.555
854.592
855.503
855.56
856.571
856.607
857.519
858.587
858.623
863.566
864.576
865.581
866.555
866.592
867.56
868.607
869.519
869.576
870.623
871.534
872.639
874.581
877.581
878.592
879.503
879.597
880.571
880.607
881.519
882.587
882.623
883.534
884.639
885.55
889.581
890.519
891.597
894.55
894.623
896.639
898.581
898.654
900.597
901.545
903.56
908.566
908.602
910.581
919.628
920.566
922.581
924.597
926.613
926.686
929.576
938.686
939.524
945.644
946.581
950.613
965.54
