# Supplementary material for: Defining the Baseline and Oxidant Perturbed Lipidomic Profiles of Daphnia magna
Source: Metabolites. 2017 Mar 15;7(1):11. doi: 10.3390/metabo7010011 (PMC5372214; doi:10.3390/metabo7010011)
Supplement: Supplementary file 1 [file metabolites-07-00011-s001.zip › Table S6.xlsx]

## Sheet: S6
Table S6 Putative identification of lipids detected in the mass spectra of D. magna lipid extracts exposed to CuSO4 in vivo. NA indicates compound is not in the LipidBlast library
Observed		Statistics		Identification
mz	Average intensitya	Fold changeb	p-valuec	Empirical formula	Ion form	Theoretical mass (Da)d	Mass error (ppm)e	Putative ID
201.038	22632	1.52365	0.882498	0
223.038	31796	0.637339	0.76838	0
225.017	19864.3	0.546232	0.720442	C7H10O6	[M+Cl]-	225.017	0.88	['2,4-Dihydroxyhept-2-enedioate', '4-Hydroxy-2-oxo-heptanedioate']
237.117	4043.42	0.226873	0.00223469	0
250.19	9881.87	0.836416	0.818844	0
263.133	7517.65	0.839244	0.791258	0
265.218	5281.75	0.894357	0.80334	0
302.221	19382.5	1.02204	0.818844	0
303.233	68756.8	0.943423	0.983488	C20H32O2	[M-H]-	303.233	1.47	['NA', '(+)-Serradiol', '(-)-Amijiol', '(-)-Cladielline', '(-)-Isoamijiol', '(-)-Reiswigin A', '(5Z,8Z,11Z,14Z)-Icosatetraenoic acid', '16:3(2E,10E,12E)(3Me,5Me[R],7My,15Me)', '16:3(2E,9E,11E)(3Me,5Me[S],7My,15Me)', '17:4(2E,4E,9E,11E)(7Me[R],10Me,13Me[S])', '17:4(2E,4E,9E,11E)(8Me[R],10Me,15Me[R])', '20:4(5Z,13Z,16Z,19Z)', '5(E)-Arachidonic acid', 'Acutilol A', 'Cis-8,11,14,17-Eicosatetraenoic a…
305.249	29311.5	0.912639	0.81818	C20H34O2	[M-H]-	305.249	1.4	['NA', '(5Z,9E,14Z)-icosa-5,9,14-trienoic acid', '(8Z,11Z,14Z)-Icosatrienoic acid', '20:3(5Z,13Z,16Z)', '5,8,11-Eicosatrienoic acid', 'Icosatrienoic acid', 'Oncobic acid', 'Plaunotol', 'Sciadonic acid', 'eicosa-5Z,8Z,14Z-trienoic acid']
305.249	29311.5	0.912639	0.81818	C18H30	[M+Hac-H]-	305.249	1.4	['NA', '5-propylideneisolongifolane']
325.239	15977.1	0.765062	0.801449	C19H34O4	[M-H]-	325.238	1.1	['NA', 'Ceriporic acid A']
325.239	15977.1	0.765062	0.801449	C17H30O2	[M+Hac-H]-	325.238	1.1	['NA']
359.221	19851.6	1.00572	0.801449	C20H34O4	[M+Na-2H]-	359.22	0.78	['NA', '11,12-DHET', '11-deoxy-PGE1', '11-deoxy-PGF2a', '11-deoxy-PGF2beta', '12-Keto-tetrahydro-leukotriene B4', '14,15-DHET', '5,6-DHET', '8,9-DHET', '8R,9S-cis-epoxy-10S-hydroxy-eicosa-11Z,14Z-dienoic acid.']
365.343	29403	0.861613	0.951106	C24H46O2	[M-H]-	365.343	0.62	['NA', '(15Z)-Tetracosenoic acid', '4-Methyl-3-heptyl palmitoleate', 'trans-selacholeic acid']
365.343	29403	0.861613	0.951106	C22H42	[M+Hac-H]-	365.343	0.62	['NA']
368.25	23339.2	3.7574	0.594195	0
373.005	13381.8	0.530894	0.801449	0
377.27	75686.3	1.14926	0.857526	C21H34O2	[M+Hac-H]-	377.27	0.6	['3-hydroxy-5beta-pregnan-20-one', '3-hydroxypregnan-20-one', '3alpha-Hydroxy-5alpha-pregnan-20-one', '3alpha-hydroxy-5beta-pregnan-20-one', '3beta-Hydroxy-5beta-pregnane-20-one', 'Allopregnanolone', 'Pregn-5-ene-3beta,20alpha-diol', 'Pregn-5-ene-3beta,20beta-diol']
377.27	75686.3	1.14926	0.857526	C23H38O4	[M-H]-	377.27	0.6	['NA', '2-Arachidonoylglycerol', 'Meteneprost (USAN/INN)', 'Norchenodeoxycholic acid']
380.248	17436.3	8.00974	0.00740394	0
383.317	41589.5	1.03029	0.996627	C21H40O2	[M+Hac-H]-	383.317	0.77	['NA', '18:1(5Z)(9Me,13Me,17Me)', '21:1(7Z)']
383.317	41589.5	1.03029	0.996627	C23H44O4	[M-H]-	383.317	0.77	['Tricosanedioic acid']
385.015	14174.9	0.722442	0.81818	0
386.328	42469	0.49496	0.801449	C20H41NO2	[M+Hac-H]-	386.328	0.77	['N,N-Dimethylsphing-4-enine', 'Stearoylethanolamide']
386.336	45216.8	0.962603	0.887621	0
387.026	881278	1.05954	0.951168	0
387.276	38474.4	0.767332	0.720442	0
389.117	68290.3	1.26542	0.801449	0
389.311	50984.9	0.718977	0.830956	0
391.208	41879.8	1.27512	0.846144	0
391.282	9027.43	0.0314116	0.00223469	0
393.229	30019.2	0.850169	0.802357	C20H30O4	[M+Hac-H]-	393.228	0.7	['NA', '(-)-8,16-Dihydroxy-19-serrulatanoic acid', '(-)-Cassaic acid', '(-)-Leucothol C', '12-J2-IsoP', '12-Keto-leukotriene B4', '12-epi-12-J2-IsoP', '12S-HpEPE', '14,15-dehydro-LTB4', '15-A2c-IsoP', '15-A2t-IsoP', '15-J2-IsoP', '15-Keto-13,14-dihydroprostaglandin A2', '15-deoxy-delta-12,14-PGD2', '15-epi-15-A2c-IsoP', '15-epi-15-A2t-IsoP', '15-epi-15-J2-IsoP', '15R-PGA2', '15S-HpEPE', '18R-HpEP…
393.268	19795	0.829539	0.801449	0
393.299	17022.4	1.00174	0.999467	C22H44O4	[M+Na-2H]-	393.299	-0.2	['NA']
395.244	456034	1.00318	0.791258	C20H32O4	[M+Hac-H]-	395.244	0.55	['NA', '(-)-Stolondiol', '(13E)-(15S)-15-Hydroxy-9-oxoprosta-11,13-dienoate', '11(R)-HPETE', '11,12-DiHETE', '11,12-epoxy-8-hydroxyeicosa-5,9,14-trienoic acid', '11-HpETE', '11-deoxy-PGE2', '11H-14,15-EETA', '12(R)-HPETE', '12(S)-HPETE', '12(S)-Leukotriene B4', '14,15-DiHETE', '14,15-HxA3 (11S)', '14,15-HxB3 (13R)', '15-epi-PGA1', '15H-11,12-EETA', '15S-HpETE', '17,18-DiHETE', '5(S)-HPETE', '5,12…
395.244	456034	1.00318	0.791258	C22H36O6	[M-H]-	395.244	0.55	['NA', 'PGF2alpha-11-acetate']
395.278	65638.6	1.597	0.730251	0
395.39	18473.8	0.652629	0.801449	C26H52O2	[M-H]-	395.389	0.45	['NA', '25:0(18Me)', '25:0(23Me)', '26:0(18Me)', '26:0(18Me,24Me)', '4-Methyl-3-heptyl stearate ', 'Hexacosanoic acid', 'Isocerotic acid', 'Lauryl myristate', 'Mycocerosic acid (C26)', 'Mycosanoic acid (C26)', 'Myristyl laurate']
395.39	18473.8	0.652629	0.801449	C24H48	[M+Hac-H]-	395.389	0.45	['NA']
396.247	104948	0.998675	0.791258	0
396.349	152656	0.919208	0.966401	0
397.333	23968	1.80538	0.791258	C24H46O4	[M-H]-	397.332	0.92	['Axillarenic acid', 'Tetracosanedioic acid']
397.333	23968	1.80538	0.791258	C22H42O2	[M+Hac-H]-	397.332	0.92	['NA', '(13Z)-Docosenoic acid', '22:1(7Z)', '22:1(9Z)', 'Cetoleic acid', 'trans-brassidic acid']
397.352	40169.6	0.96585	0.993041	0
399.329	27122.7	1.71423	0.791258	0
399.348	733879	0.950184	0.977382	C22H44O2	[M+Hac-H]-	399.348	0.39	['NA', 'Docosanoic acid', 'Isobehenic acid']
400.352	187526	0.93235	0.951168	0
401.291	42680.8	0.842541	0.605148	C20H38O4	[M+Hac-H]-	401.291	0.49	['Eicosanedioic acid', 'PGF1a alcohol']
401.355	16950.6	1.59193	0.791258	C25H50O	[M+Cl]-	401.356	-1.04	['NA', 'C25 6,7-Epoxy highly branched isoprenoid']
401.355	16950.6	1.59193	0.791258	C26H52	[M+K-2H]-	401.356	-0.89	['NA']
402.323	219679	1.15515	0.801449	0
403.021	32611.3	1.51369	0.801449	0
403.133	120053	1.0389	0.98154	0
403.307	157841	1.00021	0.951168	C20H40O4	[M+Hac-H]-	403.307	0.71	['11,12-dihydroxy arachidic acid', 'MG(17:0/0:0/0:0)[rac]', 'Phytophthora mating hormone alpha1']
403.324	101635	2.54982	0.720442	0
404.136	17136.2	1.00308	0.999284	0
404.302	192988	1.48235	0.76838	0
405.224	147419	1.0708	0.983414	0
405.338	41344	0.977695	0.948232	C24H42O	[M+Hac-H]-	405.337	0.52	['Nor-Dolichol-[13-22]']
406.227	29912.7	1.14533	0.926422	0
407.284	42635.8	0.989833	0.998079	0
409.273	65456.8	0.955429	0.981048	C25H40O3	[M+Na-2H]-	409.272	0.94	['(+)-Desoxyscalarin', '1alpha,25-dihydroxy-23,24-dinorvitamin D3 / 1alpha,25-dihydroxy-23,24-dinorcholecalciferol', '1alpha,25-dihydroxy-26,27-dinorvitamin D3 / 1alpha,25-dihydroxy-26,27-dinorcholecalciferol', '1alpha-hydroxy-21-nor-20-oxavitamin D3 / 1alpha-hydroxy-21-nor-20-oxacholecalciferol']
409.273	65456.8	0.955429	0.981048	C22H44O4	[M+K-2H]-	409.273	0.57	['NA']
409.311	247984	0.920438	0.854941	C28H42O2	[M-H]-	409.311	0.33	['beta-Tocotrienol', 'calicoferol D', 'gamma-Tocotrienol']
410.315	76227.3	0.913943	0.830956	0
411.275	199880	0.642974	0.641092	C21H36O4	[M+Hac-H]-	411.275	0.43	['Ceriporic acid C']
412.307	21353.2	0.744514	0.801449	C21H39NO3	[M+Hac-H]-	412.307	0.35	['N-oleoyl alanine', 'N-palmitoyl proline']
412.307	21353.2	0.744514	0.801449	C23H43NO5	[M-H]-	412.307	0.35	['N-stearoyl glutamic acid']
413.222	101408	1.12197	0.898322	C20H41O4P	[M+K-2H]-	413.223	-1.61	['Phytyl phosphate']
413.291	81438.2	0.761157	0.720442	C21H38O4	[M+Hac-H]-	413.291	0.33	['Ceriporic acid B', 'MG(18:2(9Z,12Z)/0:0/0:0)[rac]', 'PGF2alpha methyl ether']
413.327	30597	0.916386	0.856981	C22H42O3	[M+Hac-H]-	413.327	0.46	['NA']
413.357	38526.6	1.02283	0.999284	0
413.364	1.38247e+06	1.03989	0.991193	C23H46O2	[M+Hac-H]-	413.364	0.11	['NA', 'Tricosanoic acid']
414.226	20378.5	1.28349	0.887621	0
414.323	123459	0.784774	0.801449	C21H41NO3	[M+Hac-H]-	414.322	0.25	['N-palmitoyl valine', 'N-stearoyl alanine']
414.367	366442	1.01936	0.998079	0
415.282	43693.3	0.847469	0.81818	0
415.307	109683	0.791626	0.720442	C21H40O4	[M+Hac-H]-	415.307	0.33	['Heneicosanedioic acid', 'MG(0:0/18:1(9Z)/0:0)', 'MG(18:1(11E)/0:0/0:0)[rac]', 'MG(18:1(9Z)/0:0/0:0)[rac]']
415.326	44150.2	0.790762	0.805733	0
415.343	22427.2	0.827168	0.769306	C22H44O3	[M+Hac-H]-	415.343	0.32	['(+)-3-hydroxy behenic', '13-Hydroxydocosanoic acid', '2-hydroxy behenic', 'omega-hydroxy behenic']
415.371	41279.2	1.07236	0.951168	C26H52O	[M+Cl]-	415.371	-1.2	['NA']
415.371	41279.2	1.07236	0.951168	C27H54	[M+K-2H]-	415.371	-1.05	['NA']
416.302	29593.4	0.599168	0.720442	C20H39NO4	[M+Hac-H]-	416.302	0.55	['N-palmitoyl threonine']
416.31	27981	0.746519	0.720442	0
416.338	104680	1.25075	0.720442	0
417.037	56453.4	1.28571	0.912352	0
417.148	27157.2	1.02532	0.953288	0
417.24	69880.9	0.966075	0.983199	C19H41O6P	[M+Na-2H]-	417.239	1.88	['PA(O-16:0/0:0)']
417.286	24777.1	0.992734	0.985501	C20H38O5	[M+Hac-H]-	417.286	0.2	['NA']
417.322	377868	1.01724	0.817102	C21H42O4	[M+Hac-H]-	417.322	0.18	['Glyceryl monostearate (JP16/NF)']
417.359	30334	0.83517	0.76838	0
418.318	58790.7	0.305542	0.0403259	0
418.326	94272.3	1.03219	0.801449	0
419.229	14716.1	1.0353	0.867765	0
419.239	613025	1.02225	0.948232	C22H38O5	[M+(37Cl)]-	419.238	1.96	['14-F2-dihomo-IsoP', '16,16-dimethyl-PGE1', '16,16-dimethyl-PGF2beta', '17-F2-dihomo-IsoP', '1a,1b-dihomo-PGE1', '1a,1b-dihomo-PGF2alpha', '20-ethyl PGF2alpha', '7-F2-dihomo-IsoP', 'Carboprost methyl (USAN)', 'Unoprostone (INN)']
419.257	244775	0.81023	0.791258	C26H38O3	[M+Na-2H]-	419.257	0.33	['(22E,24E)-1alpha,26-dihydroxy-22,23,24,25-tetradehydro-27-norvitamin D3 / (22E,24E)-1alpha,26-dihydroxy-22,23,24,25-tetradehydro-27-norcholecalciferol', '25,26-epoxy-1alpha-hydroxy-23,23,24,24-tetradehydro-19-norvitamin D3 / 25,26-epoxy-1alpha-hydroxy-23,23,24,24-tetradehydro-19-norcholecalciferol', 'Ximaosteroid C']
419.257	244775	0.81023	0.791258	C21H41O6P	[M-H]-	419.257	0.23	['CPA(18:0)']
419.257	244775	0.81023	0.791258	C23H42O4	[M+K-2H]-	419.257	-0.04	['NA']
419.294	22278.6	1.93814	0.720442	0
419.302	532695	1.23485	0.9329	0
419.313	81223.7	0.970346	0.839823	0
420.243	132093	1.02033	0.951168	0
420.25	63745.1	1.58366	0.801449	0
420.297	58772.9	0.858256	0.977967	0
420.305	122353	1.22326	0.928976	0
421.142	54558.2	0.573664	0.801449	C22H26O6	[M+Cl]-	421.142	0.28	['3,5-Di-O-methyl-8-prenylafzelechin-4beta-ol', '4,5-Di-O-methyl-8-prenylafzelechin-4beta-ol']
421.26	13922.4	0.459747	0.76838	C22H34O4	[M+Hac-H]-	421.26	0.23	['10,11-DiHDPE', '13,14-DiHDPE', '16,16-dimethyl-PGA2', '16,17-DiHDPE', '19,20-DiHDPA', '1a,1b-dihomo-15-deoxy-delta-12,14-PGD2', '1a,1b-dihomo-PGJ2', '7,8-DiHDPE']
421.26	13922.4	0.459747	0.76838	C24H38O6	[M-H]-	421.26	0.23	['NA']
421.281	309349	0.917969	0.830956	0
421.329	40641.9	0.878571	0.830956	0
421.333	14884.2	0.780397	0.88873	0
422.284	74535.2	0.920655	0.818844	0
423.348	24909.2	0.78931	0.791258	C24H44O2	[M+Hac-H]-	423.348	0.16	['NA', '24:2(5Z,9Z)']
425.327	19756.3	0.8644	0.830956	0
425.364	74718.8	0.89879	0.830956	C26H50O4	[M-H]-	425.364	0.16	['Hexacosanedioic acid']
425.364	74718.8	0.89879	0.830956	C24H46O2	[M+Hac-H]-	425.364	0.16	['NA', '(15Z)-Tetracosenoic acid', '4-Methyl-3-heptyl palmitoleate', 'trans-selacholeic acid']
426.303	16051.8	0.072605	0.439848	0
426.322	33944.9	0.924123	0.961029	C22H41NO3	[M+Hac-H]-	426.322	-0.04	['N-oleoyl GABA', 'PGE2alpha dimethyl amine']
426.367	16896.7	0.763496	0.907136	0
426.982	38128.8	1.09187	0.981081	0
427.307	18446.9	0.263884	0.0793767	0
427.343	56149.5	0.929212	0.852907	C23H44O3	[M+Hac-H]-	427.343	0.14	['NA']
427.372	25602.7	0.918048	0.959477	0
427.375	38973.3	0.904973	0.887621	0
427.379	1.20186e+06	0.892304	0.830956	C24H48O2	[M+Hac-H]-	427.379	-0.15	['NA', '4-Methyl-3-heptyl palmitate ', 'Lauryl laurate', 'Mycocerosic acid (C24)', 'Mycosanoic acid (C24)', 'Tetracosanoic acid']
428.302	29606.5	0.993767	0.951168	C23H43NO6	[M-H]-	428.302	0.16	['hexadecanedioic acid mono-L-carnitine ester']
428.338	155211	0.986856	0.999467	C22H43NO3	[M+Hac-H]-	428.338	0.1	['Aplidiasphingosine', 'N-palmitoyl isoleucine', 'N-palmitoyl leucine', 'N-stearoyl GABA']
428.383	341030	0.896949	0.830956	0
429.051	34922.5	0.444339	0.620739	0
429.073	42635.2	0.972583	0.89123	0
429.286	11964.9	1.5114	0.801449	0
429.297	28188.6	0.85982	0.9309	0
429.322	30027.3	0.833084	0.791258	C22H42O4	[M+Hac-H]-	429.322	0.55	['Docosanedioic acid']
429.359	45790.4	0.879613	0.791258	C23H46O3	[M+Hac-H]-	429.359	-0.07	['NA']
429.374	77365.4	0.816786	0.801449	C27H46	[M+Hac-H]-	429.374	-0.19	['5-Cholestene']
429.374	77365.4	0.816786	0.801449	C29H50O2	[M-H]-	429.374	-0.19	['NA', '22S-hydroxysitosterol', '4beta-(hydroxymethyl)-4alpha-methyl-5alpha-cholest-7-en-3beta-ol', 'alpha-Tocopherol', 'toxisterol3 B1/ (5E)-(10R)-10-ethoxy-10,19-dihydrovitamin D3 / (5E)-(10R)-10-ethoxy-10,19-dihydrocholecalciferol', 'toxisterol3 B2 / (5E)-(10S)-10-ethoxy-10,19-dihydrovitamin D3 / (5E)-(10S)-10-ethoxy-10,19-dihydrocholecalciferol', 'toxisterol3 B3 / (10R)-10-ethoxy-10,19-dihydr…
429.386	40550.1	0.872979	0.801449	C27H54O	[M+Cl]-	429.387	-1.2	['NA']
429.386	40550.1	0.872979	0.801449	C28H56	[M+K-2H]-	429.387	-1.06	['NA']
429.395	148189	0.804874	0.749274	C24H50O2	[M+Hac-H]-	429.395	-0.08	['1,2-tetracosanediol']
430.317	50479.6	0.903169	0.791258	C21H41NO4	[M+Hac-H]-	430.317	0.11	['N-stearoyl serine']
430.354	108505	1.19323	0.801449	0
430.377	24072.8	0.70707	0.791258	0
430.398	35716.6	1.27025	0.720442	0
430.969	42786.4	1.00506	0.801449	0
431.171	348310	0.800716	0.801449	C21H24O6	[M+Hac-H]-	431.171	-0.15	['5-O-Methyl-8-prenylafzelechin-4beta-ol']
431.221	55993.7	0.767756	0.801449	C23H38O5	[M+K-2H]-	431.221	0.04	['12-HETE-G', '15-HETE-G']
431.221	55993.7	0.767756	0.801449	C22H36O6	[M+Cl]-	431.221	-0.1	['NA', 'PGF2alpha-11-acetate']
431.221	55993.7	0.767756	0.801449	C21H37O7P	[M-H]-	431.22	0.31	['PA(18:3(6Z,9Z,12Z)/0:0)', 'PA(18:3(9Z,12Z,15Z)/0:0)']
431.301	30323.2	0.934209	0.883188	0
431.313	57385.6	1.05897	0.791258	0
431.338	47190.1	0.98354	0.993041	C22H44O4	[M+Hac-H]-	431.338	-0.08	['NA']
431.374	82226.9	0.78277	0.720442	0
432.167	12171.3	0.574865	0.791258	0
432.174	83137	0.809176	0.801449	0
432.333	297362	1.47684	0.720442	0
432.377	21812.3	0.824861	0.801449	0
433.218	17764	0.654526	0.791258	C22H36O6	[M+(37Cl)]-	433.218	0.07	['NA', 'PGF2alpha-11-acetate']
433.229	9287.68	0.8406	0.81818	0
433.234	422712	0.758071	0.791258	0
433.255	117768	0.965584	0.993041	C23H40O5	[M+(37Cl)]-	433.254	1.39	['NA', '10-F2-dihomo-IsoP', 'PGF2alpha isopropyl ester']
433.317	461907	1.19448	0.927881	0
433.328	98157.5	0.932391	0.81818	0
433.336	70594.3	2.11036	0.652474	0
433.353	58890.5	1.11515	0.907048	0
433.369	79678	0.906879	0.509688	C26H46O	[M+Hac-H]-	433.369	-0.16	['19-norcholestanol']
433.369	79678	0.906879	0.509688	C28H50O3	[M-H]-	433.369	-0.16	['6-Deoxotyphasterol', '6-deoxoteasterone']
434.238	101192	0.754967	0.791258	0
434.266	96158.4	1.72109	0.801449	0
434.32	111552	1.22369	0.912352	C27H45NO	[M+Cl]-	434.32	1.94	['Demissidine']
434.332	19622.5	0.942369	0.791258	0
434.372	23993.7	0.881551	0.720442	0
434.981	46797.1	1.01709	0.951168	0
435.235	18784.6	1.20003	0.805733	0
435.239	16422.2	0.911417	0.953489	C22H32O5	[M+Hac-H]-	435.239	0.67	['NA', '4S-hydroperoxy-17S-HDHA', 'AT-Resolvin D1', 'AT-Resolvin D2', 'AT-Resolvin D3', 'AT-Resolvin D4', 'Resolvin D1', 'Resolvin D2', 'Resolvin D3', 'Resolvin D4']
435.242	42675.5	0.724913	0.801449	0
435.257	21443.9	0.999581	0.953489	C25H40O4S	[M-H]-	435.257	0.06	['1alpha-hydroxy-24-methylsulfonyl-25,26,27-trinorvitamin D3 / 1alpha-hydroxy-24-methylsulfonyl-25,26,27-trinorcholecalciferol']
435.26	7969.7	0.84326	0.801449	0
435.296	35611.3	0.903738	0.882498	0
435.345	65170.8	0.99098	0.953288	0
435.349	22481.2	1.19023	0.948232	0
436.248	52809.9	0.924837	0.887621	C21H39NO6	[M+Cl]-	436.247	1.86	['Myriocin', 'Sphingofungin F']
436.253	1.56315e+06	0.904087	0.912352	0
436.283	30577.5	0.928611	0.209594	C23H45NO4	[M+K-2H]-	436.283	-0.49	['L-Palmitoylcarnitine']
436.283	30577.5	0.928611	0.209594	C21H44NO6P	[M-H]-	436.283	-0.23	['PE(P-16:0e/0:0)']
436.291	66184.9	1.07698	0.874509	0
436.348	16456.4	1.28096	0.81818	0
437.252	29560.1	1.00171	0.993974	0
437.257	127083	0.911459	0.860466	0
437.304	146017	0.98323	0.999467	C27H44O3	[M+Na-2H]-	437.304	0.06	['NA', '(22R)-22,25-dihydroxyvitamin D3 / (22R)-22,25-dihydroxycholecalciferol', '(22S)-22,25-dihydroxyvitamin D3 / (22S)-22,25-dihydroxycholecalciferol', '(23R)-23,25-dihydroxyvitamin D3 / (23R)-23,25-dihydroxycholecalciferol', '(23S)-23,25-dihydroxyvitamin D3 / (23S)-23,25-dihydroxycholecalciferol', '(24R)-1alpha,24-dihydroxyvitamin D3 / (24R)-1alpha,24-dihydroxycholecalciferol', '(24R)-24,25-d…
437.364	32922.8	1.50298	0.801449	C25H46O2	[M+Hac-H]-	437.364	-0.01	['NA', '22:2(5Z,9Z)(13Me,17Me,21Me)']
437.4	13969.8	2.43148	0.509688	0
438.288	100647	1.03256	0.999467	0
438.299	13943	1.00112	0.830956	C26H43NO3	[M+Na-2H]-	438.299	0.04	['1alpha,25-dihydroxy-23-azavitamin D3 / 1alpha,25-dihydroxy-23-azacholecalciferol', 'N-Oleoyl dopamine', 'N-arachidonoyl isoleucine', 'N-arachidonoyl leucine']
438.299	13943	1.00112	0.830956	C21H46NO6P	[M-H]-	438.299	-0.05	['PC(O-12:0/O-1:0)', 'PE(O-16:0/0:0)']
438.307	33851.2	1.08465	0.97012	0
439.285	429654	1.045	0.999255	0
439.291	21389.2	1.18797	0.912352	0
439.301	47344.5	0.959357	0.997037	0
439.343	32136.9	0.888669	0.818844	C24H44O3	[M+Hac-H]-	439.343	-0.34	['NA']
439.379	108727	0.942876	0.858895	C25H48O2	[M+Hac-H]-	439.379	-0.33	['NA', '22:1(5Z)(13Me,17Me,21Me)', 'Mycolipenic acid (C25)']
440.288	97619.1	1.0726	0.997037	0
440.383	30358	0.868564	0.932248	0
440.998	221960	1.06442	0.951168	0
441.187	31763.3	1.09513	0.951168	C23H32O6	[M+(37Cl)]-	441.186	1.36	['Caesalpinin N', 'Cortisol 21-acetate', 'adonitoxigenin', 'strophanthidin']
441.223	31143.5	0.848498	0.801449	C24H36O5	[M+(37Cl)]-	441.223	1.34	['NA', '7alpha,12alpha-Dihydroxy-3-oxochol-4-enoate']
441.249	167755	0.914008	0.951168	0
441.286	76390.6	0.788176	0.801449	C22H38O5	[M+Hac-H]-	441.286	-0.36	['14-F2-dihomo-IsoP', '16,16-dimethyl-PGE1', '16,16-dimethyl-PGF2beta', '17-F2-dihomo-IsoP', '1a,1b-dihomo-PGE1', '1a,1b-dihomo-PGF2alpha', '20-ethyl PGF2alpha', '7-F2-dihomo-IsoP', 'Carboprost methyl (USAN)', 'Unoprostone (INN)']
441.322	29682.3	0.832265	0.802357	C23H42O4	[M+Hac-H]-	441.322	-0.3	['NA']
441.358	37921.8	1.47555	0.720442	C24H46O3	[M+Hac-H]-	441.359	-0.22	['NA', 'Hydroxynervonic acid']
441.387	12163.5	1.02834	0.985501	C29H56	[M+K-2H]-	441.387	-0.4	['NA']
441.395	1.27303e+06	0.960494	0.818844	C25H50O2	[M+Hac-H]-	441.395	-0.46	['NA', '24:0(17Me)', '24:0(18Me)', 'Isopentacosanoic acid', 'Mycocerosic acid (C25)', 'Mycosanoic acid (C25)', 'Pentacosanoic acid']
442.001	22284.1	1.09292	0.956705	0
442.253	40547	0.86084	0.818844	0
442.317	41972.2	0.903521	0.912352	C22H41NO4	[M+Hac-H]-	442.317	-0.3	['N-oleoyl threonine']
442.354	21529.3	1.04193	0.791258	C23H45NO3	[M+Hac-H]-	442.354	-0.13	['N-stearoyl valine']
442.393	7423.4	2.05907	0.791258	0
442.398	357437	0.96385	0.81818	0
443.089	110778	0.92767	0.953288	0
443.229	21673.4	1.19548	0.852907	0
443.247	150713	0.959836	0.956705	0
443.301	37759.8	0.910798	0.801449	0
443.313	33041.8	8.09567	0.000776478	C21H40N2O4	[M+Hac-H]-	443.313	0.72	['N-palmitoyl glutamine']
443.338	19614.5	2.88769	0.720442	C23H44O4	[M+Hac-H]-	443.338	0.65	['Tricosanedioic acid']
443.374	33863.3	0.9873	0.966401	C24H48O3	[M+Hac-H]-	443.374	-0.43	['NA', 'DL-Cerebronic acid', 'Mycolipanolic acid (C24)']
443.402	41988.7	0.986746	0.840811	C28H56O	[M+Cl]-	443.403	-1.77	['NA']
443.402	41988.7	0.986746	0.840811	C29H58	[M+K-2H]-	443.402	-1.64	['NA']
443.41	86048.5	0.923736	0.889741	0
444.25	40621	1.28794	0.802357	0
444.314	81712.6	1.21411	0.960634	0
444.333	77065.1	0.575461	0.0123865	0
444.369	33853.4	0.959508	0.791258	0
444.406	20079.3	0.752046	0.749274	0
444.414	18336.1	1.25207	0.801449	0
444.985	98501.1	0.957455	0.81818	0
445.181	41148.1	0.818689	0.791258	0
445.187	1.3492e+06	0.837835	0.801449	C22H26O6	[M+Hac-H]-	445.187	-0.39	['3,5-Di-O-methyl-8-prenylafzelechin-4beta-ol', '4,5-Di-O-methyl-8-prenylafzelechin-4beta-ol']
445.187	1.3492e+06	0.837835	0.801449	C24H30O8	[M-H]-	445.187	-0.39	['Estrone glucuronide']
445.244	22367.3	0.80722	0.801449	C20H34O7	[M+Hac-H]-	445.244	-0.51	['Oleandolide']
445.254	31254.6	1.00175	0.999467	C24H40O5	[M+(37Cl)]-	445.254	0.86	['NA', '3a,7b,12a-Trihydroxy-5a-Cholanoic acid', '3a,7b,12b-Trihydroxy-5b-cholanoic acid', '3b,7b,12a-Trihydroxy-5a-Cholanoic acid', '3b,7b,12a-Trihydroxy-5b-cholanoic acid', 'Alloavicholic acid', 'Allocholic acid', 'Avicholate', 'Bitocholate', 'Cholic acid', 'Cygnocholic acid', 'Haemulcholate', 'Hyocholate', 'Ursocholate', 'Vulpecholate', 'alpha-Muricholate', 'beta-Muricholate', 'beta-Phocaechol…
445.281	32302.4	0.966232	0.801449	C21H38O6	[M+Hac-H]-	445.281	0.26	['6-Deoxyerythronolide B']
445.317	74180.6	1.01845	0.991193	0
445.336	10800.4	0.195867	0.0487991	0
445.353	78475.5	1.07456	0.948232	C23H46O4	[M+Hac-H]-	445.353	-0.52	['MG(20:0/0:0/0:0)[rac]']
445.368	64699.7	1.002	0.801449	C27H46O	[M+Hac-H]-	445.369	-0.83	['NA', '15-dehydro-A-norcholestanol', '3beta-Hydroxycholest-4-ene', '5alpha-Cholest-8-en-3beta-ol', '5alpha-Cholestan-3-one', '5beta-Cholestan-3-one', 'Cholesterol', 'Lathosterol', 'Patinosterol', 'dihydrotachysterol3 / (5E)-(10S)-10,19-dihydrovitamin D3 / (5E)-(10S)-10,19-dihydrocholecalciferol', 'toxisterol3 R1 / 6,19-dihydrovitamin D3 / 6,19-dihydrocholecalciferol']
445.368	64699.7	1.002	0.801449	C29H50O3	[M-H]-	445.369	-0.83	['NA', '24-hydroperoxy-24-vinylcholesterol', 'Nebrosteroid M']
445.39	42765.1	0.84636	0.801449	0
445.405	61095.3	0.948036	0.951106	C30H54O2	[M-H]-	445.405	-0.46	['30:3(5Z,9Z,23Z)', 'Lauryl linolenate', 'Linolenyl laurate']
446.19	344827	0.848088	0.802357	0
446.312	26462.6	1.05947	0.791258	0
446.349	38848.6	0.86274	0.791258	0
446.372	19071.1	1.02318	0.818844	0
446.408	15574.8	0.72088	0.791258	0
446.982	32027.3	1.0003	0.801449	0
447.035	21511.4	1.175	0.951168	0
447.194	30938	0.717233	0.730251	0
447.27	377192	1.56994	0.720442	0
447.288	174842	0.718595	0.791258	C28H42O3	[M+Na-2H]-	447.288	-0.19	['NA', '(22E,24E)-1alpha,25-dihydroxy-22,23,24,24a-tetradehydro-24a-homovitamin D3 / (22E,24E)-1alpha,25-dihydroxy-22,23,24,24a-tetradehydro-24a-homocholecalciferol', '25-hydroxy-1alpha-hydroxymethyl-23,23,24,24-tetradehydrovitamin D3 / 25-hydroxy-1alpha-hydroxymethyl-23,23,24,24-tetradehydrocholecalciferol', '25-hydroxy-1beta-hydroxymethyl-23,23,24,24-tetradehydro-3-epivitamin D3 / 25-hydroxy-1b…
447.296	44086.4	1.12891	0.9309	0
447.315	75308.5	0.790253	0.509688	0
447.325	11518.9	1.5509	0.835476	C26H50O3	[M+K-2H]-	447.325	0.02	['3-oxohexacosanoic acid']
447.325	11518.9	1.5509	0.835476	C29H46O2	[M+Na-2H]-	447.324	0.36	['NA', '1alpha-hydroxy-24-methylvitamin D2 / 1alpha-hydroxy-24-methylergocalciferol', 'zymosterol intermediate 1c']
447.327	24478.8	1.33107	0.801449	0
447.333	1.16545e+06	1.3834	0.801449	C23H46N4O3	[M+Na-2H]-	447.332	1.99	['N-stearoyl arginine']
447.344	47765.4	1.17478	0.962331	0
447.369	60097.6	1.22932	0.81818	0
447.421	31198.1	1.02434	0.991193	C30H56O2	[M-H]-	447.421	-0.43	['26:2(5Z,9Z)(13Me,17Me,21Me,25Me)', '29:2(5Z,9Z)(22Me)', '29:2(5Z,9Z)(26Me)', '30:2(9Z,23Z)', 'Lauryl linoleate', 'Linoleyl laurate', 'Myristolel palmitoleate', 'Palmitoleyl myristoleate']
448.161	38396.7	0.943287	0.831743	0
448.274	99493.5	1.04056	0.993041	C20H39NO4S	[M+Hac-H]-	448.274	-0.72	['N-oleoyl taurine']
448.291	44533.5	0.676006	0.786914	C20H39NO6	[M+Hac-H]-	448.292	-0.83	['Sphingofungin B']
448.328	31783.7	1.95654	0.791258	0
448.336	286903	1.38643	0.801449	C28H47NO	[M+Cl]-	448.335	1.48	['Verazine']
448.996	212397	1.00359	0.948232	0
449.042	18247.6	1.26375	0.888046	0
449.25	28919.8	2.00106	0.720442	0
449.304	54269.8	0.816558	0.870316	C28H44O3	[M+Na-2H]-	449.304	0.04	['NA', '(22E)-(25R)-1alpha,25-dihydroxy-26-methyl-22,23-didehydrovitamin D3 / (22E)-(25R)-1alpha,25-dihydroxy-26-methyl-22,23-didehydrocholecalciferol', '(22E)-(25S)-1alpha,25-dihydroxy-26-methyl-22,23-didehydrovitamin D3 / (22E)-(25S)-1alpha,25-dihydroxy-26-methyl-22,23-didehydrocholecalciferol', '(22E)-1alpha,25-dihydroxy-22,23-didehydro-24a-homovitamin D3 / (22E)-1alpha,25-dihydroxy-22,23-dide…
449.304	54269.8	0.816558	0.870316	C23H47O6P	[M-H]-	449.304	-0.05	['PA(P-20:0/0:0)']
449.312	300131	0.949632	0.986554	0
449.331	31372.1	1.41411	0.80334	0
449.34	23366.6	1.44354	0.830956	C29H48O2	[M+Na-2H]-	449.34	-0.71	['NA', "(24R,24'R)-Fucosterol epoxide", '(3beta,24S,24S)-fucosterol epoxide', '(6R)-6,19-ethano-25-hydroxy-6,19-dihydrovitamin D3 / (6R)-6,19-ethano-25-hydroxy-6,19-dihydrocholecalciferol', '(6S)-6,19-ethano-25-hydroxy-6,19-dihydrovitamin D3 / (6S)-6,19-ethano-25-hydroxy-6,19-dihydrocholecalciferol', '1-Hydroxyvitamin D5', '1alpha-hydroxy-26,27-dimethylvitamin D3 / 1alpha-hydroxy-26,27-dimethylch…
449.34	23366.6	1.44354	0.830956	C26H52O3	[M+K-2H]-	449.34	-1.05	['NA', '(S)-3-hydroxyhexacosanoic acid', 'Mycolipanolic acid (C26)']
449.36	43489.2	0.936905	0.948232	0
449.436	52551.7	0.949872	0.965685	C30H58O2	[M-H]-	449.436	-0.45	['26:1(5Z)(13Me,17Me,21Me,25Me)', '30:1(23Z))', 'Lauryl oleate', 'Lumepueic acid', 'Myristoleyl palmitate', 'Myristyl palmitoleate', 'Oleyl laurate', 'Palmitoleyl myristate', 'Palmityl myristoleate']
450	23300.9	1.07067	0.81818	0
450.316	69942.3	0.937694	0.951168	0
450.993	18420.1	0.442438	0.720442	0
451.229	51310.3	0.723661	0.932248	0
451.245	34883	1.21624	0.951168	0
451.379	19901.4	1.02257	0.985501	C26H48O2	[M+Hac-H]-	451.379	-0.54	['NA', '25:2(5Z,9Z)(23Me)', '25:2(5Z,9Z)(24Me)', '26:2(9Z,19Z)', '4-Methyl-3-heptyl linoleate ']
451.379	19901.4	1.02257	0.985501	C28H52O4	[M-H]-	451.379	-0.54	['NA']
452.278	49115.4	0.985451	0.956705	C19H40NO5P	[M+Hac-H]-	452.278	-0.41	['C19 Sphingosine-1-phosphate']
452.278	49115.4	0.985451	0.956705	C21H44NO7P	[M-H]-	452.278	-0.41	['LysoPE(16:0/0:0)', 'PC(13:0/0:0)']
453.358	24235.5	0.925447	0.791258	0
453.395	66360.7	1.01828	0.951168	C26H50O2	[M+Hac-H]-	453.395	-0.54	['NA', '22:1(5Z)(9Me,13Me,17Me,21Me)', '26:1(19Z))', '26:1(5Z))', '4-Methyl-3-heptyl oleate', 'Lauryl myristoleate', 'Myristoleyl laurate', 'Ximenic acid']
454.398	14107.2	1.25641	0.951168	0
455.008	14731.8	1.76539	0.720442	0
455.013	820718	1.06354	0.953489	0
455.338	39068	0.894069	0.801449	0
455.374	40381.2	0.920465	0.801449	C27H52O5	[M-H]-	455.374	-0.41	['DG(12:0/12:0/0:0)[iso2]']
455.41	586423	1.03474	0.909213	C26H52O2	[M+Hac-H]-	455.411	-0.4	['NA', '25:0(18Me)', '25:0(23Me)', '26:0(18Me)', '26:0(18Me,24Me)', '4-Methyl-3-heptyl stearate ', 'Hexacosanoic acid', 'Isocerotic acid', 'Lauryl myristate', 'Mycocerosic acid (C26)', 'Mycosanoic acid (C26)', 'Myristyl laurate']
456.017	96585.8	1.08175	0.927881	0
456.333	42844.3	1.13933	0.801449	0
456.414	158853	1.0343	0.862206	0
457.104	97442.9	0.99992	0.981048	0
457.182	47664.2	0.995448	0.791258	0
457.232	132431	1.1008	0.993041	0
457.244	19695.1	1.03787	0.81818	0
457.317	21078.3	1.32229	0.817102	0
457.328	20296.7	3.01829	0.687082	0
457.353	40565	0.857424	0.791258	C24H46O4	[M+Hac-H]-	457.353	-0.62	['Axillarenic acid', 'Tetracosanedioic acid']
457.39	73872	0.999749	0.951106	C25H50O3	[M+Hac-H]-	457.39	-0.52	['NA']
457.417	15851.8	1.03764	0.801449	C30H60	[M+K-2H]-	457.418	-1.35	['NA', 'C30 Monocyclic highly branched isoprenoid']
457.417	15851.8	1.03764	0.801449	C29H58O	[M+Cl]-	457.418	-1.48	['NA', 'Nonacosan-10-one']
457.426	192244	0.917076	0.836142	0
458.236	24786.2	1.77686	0.836142	0
458.349	131770	1.47591	0.720442	C23H45NO4	[M+Hac-H]-	458.349	-0.44	['L-Palmitoylcarnitine']
458.385	54235.5	0.932416	0.801449	0
458.393	18095.5	0.764927	0.801449	0
458.429	57334.3	0.891952	0.81818	0
459.196	36689	1.29193	0.836142	0
459.202	90568.2	1.12771	0.907048	0
459.297	32741.9	0.978108	0.991193	0
459.333	16538.8	1.78096	0.791258	0
459.352	43765.3	1.27784	0.76838	0
459.369	33576.6	0.943947	0.801449	0
459.405	152370	1.01756	0.988116	0
460.328	15131.8	1.00373	0.838877	C24H47NO7	[M-H]-	460.328	-0.23	['Glucosyl sphingosine', 'Psychosine']
460.364	89818.7	1.67224	0.730529	0
460.409	43278.2	0.991351	0.977967	0
461.015	23070.6	0.443155	0.720442	0
461.312	26237.7	1.78348	0.720442	0
461.343	18720.2	1.1874	0.951106	C30H42	[M+Hac-H]-	461.343	0.23	['4,4-Diaponeurosporene']
461.348	793471	1.25474	0.838877	C25H50O7	[M-H]-	461.348	-0.58	['NA']
461.4	231525	0.998216	0.999467	C28H50O	[M+Hac-H]-	461.4	-0.6	['NA', 'Campestanol', 'Ergostanol']
462.351	201674	1.25326	0.835476	0
462.403	52101.9	1.00228	0.999467	0
463.012	504258	0.979834	0.951168	0
463.283	86499.5	0.493091	0.720442	C28H42O4	[M+Na-2H]-	463.283	-0.56	['(22S)-1alpha,22,25-trihydroxy-23,24-tetradehydro-24a-homo-20-epivitamin D3 / (22S)-1alpha,22,25-trihydroxy-23,24-tetradehydro-24a-homo-20-epicholecalciferol', '1alpha-hydroxy-18-(4-hydroxy-4-methyl-2-pentynyloxy)-23,24,25,26,27-pentanorvitamin D3 / 1alpha-hydroxy-18-(4-hydroxy-4-methyl-2-pentynyloxy)-23,24,25,26,27-pentanorcholecalciferol']
463.283	86499.5	0.493091	0.720442	C23H45O7P	[M-H]-	463.283	-0.64	['PA(20:1(11Z)/0:0)']
463.327	517292	1.9219	0.76838	0
463.339	56336.9	1.51756	0.720442	0
463.355	16525.3	1.28015	0.951168	C27H54O3	[M+K-2H]-	463.356	-1.23	['Mycolipanolic acid (C27)']
463.355	16525.3	1.28015	0.951168	C30H50O2	[M+Na-2H]-	463.356	-0.9	['NA', '(+)-22(29)-Hopen-6alpha-21beta-diol', '10-hydroperoxy-squalene', '11-hydroperoxy-squalene', '2-hydroperoxy-squalene', '3-hydroperoxy-squalene', '30:5(12Z,15Z,18Z,21Z,24Z)', '30:5(15Z,18Z,21Z,24Z,27Z)', '32-hydroxylanosterol', '6-hydroperoxy-squalene', '7-hydroperoxy-squalene', 'Betulin', 'thalianol epoxide']
463.376	57073.6	0.952067	0.948232	0
464.015	58404.1	1.35432	0.76838	0
464.276	64603.9	2.40963	0.791258	0
464.331	119906	1.95956	0.76838	0
465.009	37921.9	0.48705	0.509688	0
465.103	29774.4	1.0805	0.896312	0
465.431	28626.5	0.868982	0.830956	0
466.32	76989.9	0.94917	0.953288	0
467.005	17228.2	0.632182	0.801449	0
467.316	314629	0.962287	0.951168	C30H44O4	[M-H]-	467.317	-1.68	['1alpha,25-dihydroxy-11-(3-hydroxy-1-propynyl)-9,11-didehydrovitamin D3 / 1alpha,25-dihydroxy-11-(3-hydroxy-1-propynyl)-9,11-didehydrocholecalciferol', '3-Oxoglycyrrhetinate']
467.316	314629	0.962287	0.951168	C28H40O2	[M+Hac-H]-	467.317	-1.68	['NA']
467.338	17259.3	0.54914	0.720442	C27H48O6	[M-H]-	467.338	-0.24	['NA', '5alpha-Dermophol', '5beta-Dermophol', 'Arapaimol-B', 'Herbasterol', 'Scymnol']
468.319	77045.1	0.91635	0.951106	0
469.029	1.62626e+06	1.03259	0.964011	0
470.032	198036	1.03433	0.956705	0
471.033	28274.8	1.04139	0.948232	C20H18O11	[M+K-2H]-	471.034	-1.89	['6-Hydroxyluteolin 6-xyloside', '6-Hydroxyluteolin 7-apioside', '6-Hydroxyluteolin 7-arabinopyranoside', '6-Hydroxyluteolin 7-xyloside', '8-Hydroxyluteolin 7-xyloside', 'Avicularin', 'Guaijaverin', 'Herbacetin 7-beta-L-arabinopyranoside', 'Herbacetin 8-alpha-L-arabinopyranoside', 'Herbacetin 8-xyloside', 'Isoetin 2-xyloside', 'Quercetin 3-O-alpha-D-arabinopyranoside', 'Quercetin 3-beta-L-arabino…
471.12	182761	1.0309	0.973455	0
471.226	316560	0.742506	0.830956	0
471.313	81668.9	1.19095	0.956705	0
471.348	21716	1.30105	0.932248	C30H48O4	[M-H]-	471.348	0.86	['16-Oxolycoclavanol', '26,27-diethyl-1alpha,25-dihydroxy-20,21-didehydro-23-oxavitamin D3 / 26,27-diethyl-1alpha,25-dihydroxy-20,21-didehydro-23-oxacholecalciferol', 'spinosic acid A']
471.348	21716	1.30105	0.932248	C28H44O2	[M+Hac-H]-	471.348	0.86	['NA', '(22E)-(25R)-25-hydroxy-26-methyl-22,23-didehydrovitamin D3 / (22E)-(25R)-25-hydroxy-26-methyl-22,23-didehydrocholecalciferol', '(22E)-(25S)-25-hydroxy-26-methyl-22,23-didehydrovitamin D3 / (22E)-(25S)-25-hydroxy-26-methyl-22,23-didehydrocholecalciferol', '1alpha,25-dihydroxy-20-epivitamin D2 / 1alpha,25-dihydroxy-20-epiergocalciferol', '24-epi-25-hydroxyvitamin D2 / 24-epi-25-hydroxyergoc…
471.405	55049.9	0.892502	0.88873	C26H52O3	[M+Hac-H]-	471.405	-0.57	['NA', '(S)-3-hydroxyhexacosanoic acid', 'Mycolipanolic acid (C26)']
472.123	31674	1.05497	0.934119	0
472.23	64190.3	1.08876	0.985501	0
472.345	61008.3	2.18024	0.801449	0
473.211	122837	1.32439	0.81818	C27H34O5	[M+Cl]-	473.21	1.76	['7-O-Methyllicoricidin']
473.218	208344	1.04779	0.887082	0
473.282	111498	0.913053	0.791258	C29H42O3	[M+Cl]-	473.283	-1.15	['(17Z)-1alpha,25-dihydroxy-26,27-dimethyl-17,20,22,22,23,23-hexadehydrovitamin D3 / (17Z)-1alpha,25-dihydroxy-26,27-dimethyl-17,20,22,22,23,23-hexadehydrocholecalciferol', '1alpha,25-dihydroxy-26,27-dimethyl-20,21,22,22,23,23-hexadehydrovitamin D3 / 1alpha,25-dihydroxy-26,27-dimethyl-20,21,22,22,23,23-hexadehydrocholecalciferol']
473.348	23848.5	1.40105	0.830956	0
473.391	7479.47	0.449712	0.509688	0
473.394	18763.5	0.745151	0.76838	0
473.4	867722	0.766092	0.76838	C29H50O	[M+Hac-H]-	473.4	-0.78	['NA', '23,24-dihydro-5alpha-calystanol', '23-methylene-24-methylcholestanol', '28-Isofucostanol', '4,4-dimethyl-5alpha-cholest-7-en-3beta-ol', 'Aplysterol', 'Clionasterol', 'Echissaposterol', 'Fucostanol', 'Petrostanol', 'Schottenol', 'Sitosterol']
473.421	101396	0.97743	0.81818	0
473.436	64299.2	1.45121	0.81818	C32H58O2	[M-H]-	473.436	-0.56	['Linolenyl myristate', 'Myristoleyl linoleate', 'Myristyl linolenate']
473.436	64299.2	1.45121	0.81818	C30H54	[M+Hac-H]-	473.436	-0.56	['Tetrahydrosqualene', 'lanostane']
474.214	20306.1	1.47852	0.830956	0
474.262	282772	1.59816	0.0142413	C23H42NO7P	[M-H]-	474.263	-0.77	['LysoPE(18:3(6Z,9Z,12Z)/0:0)', 'LysoPE(18:3(9Z,12Z,15Z)/0:0)']
474.286	34344.2	0.897728	0.730568	0
474.403	275597	0.765391	0.730568	0
474.424	25166.1	0.956882	0.920486	0
474.439	27205.4	0.786783	0.791258	0
475.266	69323.2	1.82072	0.0793767	0
475.302	24151.9	1.05698	0.991193	C26H46O5	[M+(37Cl)]-	475.301	1.27	['NA']
475.346	116496	0.811798	0.652474	0
475.407	38540.2	0.786236	0.791258	0
475.452	33611.6	1.09752	0.9309	C32H60O2	[M-H]-	475.452	-0.6	['Linoleyl myristate', 'Myristoleyl oleate', 'Myristyl linoleate', 'Oleyl myristoleate', 'Palmitoleyl palmitoleate']
476.278	142865	1.97804	0.165922	C28H41NO4	[M+Na-2H]-	476.278	-0.33	['15-HETE-DA', '15-HETE-VA']
476.278	142865	1.97804	0.165922	C23H44NO7P	[M-H]-	476.278	-0.41	['LysoPE(18:2(9Z,12Z)/0:0)']
476.349	26761	1.09249	0.956705	0
477.197	30959.4	1.06425	0.81818	0
477.227	57186.6	1.0914	0.998079	0
477.281	33386.7	1.95347	0.592718	0
477.362	52774	0.885922	0.796789	0
477.392	28508.3	0.995043	0.801449	0
477.467	68959.9	0.936444	0.951168	C32H62O2	[M-H]-	477.468	-0.66	['NA', 'Myristoleyl stearate', 'Myristyl oleate', 'Oleyl myristate', 'Palmitoleyl palmitate', 'Palmityl palmitoleate', 'Stearyl myristoleate']
478.294	186120	1.34051	0.720442	C23H46NO7P	[M-H]-	478.294	-0.62	['LysoPE(18:1(9Z)/0:0)', 'PC(15:1(9Z)/0:0)']
478.471	22821.2	0.914839	0.819226	0
479.297	46258.6	1.14908	0.730529	0
480.309	30614	1.10239	0.830956	C23H48NO7P	[M-H]-	480.31	-0.57	['LysoPC(15:0)', 'LysoPE(18:0/0:0)', 'PC(14:0/O-1:0)', 'PC(7:0/O-8:0)']
481.209	22554	1.25143	0.912352	0
481.332	18676.5	0.919782	0.951106	0
485.135	32439.5	1.05525	0.967019	0
485.221	26416.7	0.770886	0.76838	0
485.28	44080.1	0.65228	0.814767	C23H47O6P	[M+Cl]-	485.28	-0.82	['PA(P-20:0/0:0)']
487.226	116627	1.07351	0.951168	0
487.277	18991.5	0.460191	0.791258	C23H47O6P	[M+(37Cl)]-	487.277	-0.57	['PA(P-20:0/0:0)']
488.229	26236.2	0.898527	0.98154	0
489.26	144692	0.72391	0.801449	C22H45O8P	[M+Na-2H]-	489.26	0.87	['PG(P-16:0/0:0)']
489.343	21696.7	0.928593	0.801449	0
489.431	58104	0.761107	0.801449	C30H54O	[M+Hac-H]-	489.431	-0.81	['NA']
490.264	39303.9	0.740985	0.802357	C27H41NO5S	[M-H]-	490.263	0.53	['Epothilone D']
490.434	19202	0.725051	0.823931	0
491.276	43945.6	1.16221	0.81818	C22H47O8P	[M+Na-2H]-	491.276	0.7	['PG(O-16:0/0:0)']
491.359	130932	1.69703	0.720442	0
492.362	34044.3	1.90833	0.720442	C30H51NO2	[M+Cl]-	492.361	1.08	['3-O-Aminopropyl-25-hydroxyvitamin D3']
493.261	24880	0.734344	0.948232	0
493.462	26149	0.796277	0.81818	0
495.225	47745.5	1.01092	0.944394	0
495.309	371290	0.720213	0.81818	C29H46O5	[M+Na-2H]-	495.309	-0.79	['NA', '18-acetoxy-1alpha,25-dihydroxyvitamin D3 / 18-acetoxy-1alpha,25-dihydroxycholecalciferol']
495.309	371290	0.720213	0.81818	C24H49O8P	[M-H]-	495.309	-0.87	['PG(P-18:0/0:0)']
496.312	96556.4	0.724394	0.828255	0
497.457	52502.6	0.865143	0.791258	C29H58O2	[M+Hac-H]-	497.458	-0.87	['Mycocerosic acid (C29)', 'Nonacosanoic acid']
498.245	18395.8	1.0632	0.823931	0
499.039	37326.2	1.16146	0.981081	0
499.151	11595.2	3.36263	0.720442	0
499.344	18718.8	3.0734	0.720442	0
499.364	15854.7	1.02002	0.979886	0
499.436	13594.7	0.582961	0.791258	C28H56O3	[M+Hac-H]-	499.437	-0.96	['NA', 'Mycolipanolic acid (C28)']
500.432	15673.8	0.721251	0.81818	0
501.242	362368	0.999831	0.953489	C29H38O5	[M+Cl]-	501.241	0.74	['Minabeolide-2']
501.416	27882.1	0.8626	0.802357	0
501.467	16165.3	1.42358	0.720442	C34H62O2	[M-H]-	501.468	-0.75	['Linolenyl palmitate', 'Linoleyl palmitatoleate', 'Palmitoleyl linoleate', 'Palmityl linolenate']
502.245	84958.8	1.07398	0.951168	0
503.237	74286.8	0.84496	0.929202	0
503.35	21253.3	1.14748	0.98529	C32H50O3	[M+Na-2H]-	503.351	-0.48	['(22E,24E)-1alpha,25-dihydroxy-26,27-diethyl-22,23,24,24a-tetradehydro-24a-homovitamin D3 / (22E,24E)-1alpha,25-dihydroxy-26,27-diethyl-22,23,24,24a-tetradehydro-24a-homocholecalciferol', '1alpha,25-dihydroxy-26,27-dimethyl-22,22,23,23-tetradehydro-24a,24b,24c-trihomo-20-epivitamin D3 / 1alpha,25-dihydroxy-26,27-dimethyl-22,22,23,23-tetradehydro-24a,24b,24c-trihomo-20-epicholecalciferol']
504.371	63036.1	0.971363	0.985501	0
504.417	31490.8	0.845399	0.830956	0
505.374	31519.2	1.0722	0.836875	0
505.426	28203	0.589129	0.720442	C30H54O2	[M+Hac-H]-	505.426	-0.3	['30:3(5Z,9Z,23Z)', 'Lauryl linolenate', 'Linolenyl laurate']
507.405	17043.8	0.825911	0.887621	C31H56O5	[M-H]-	507.405	-0.92	['DG(14:1(9Z)/14:1(9Z)/0:0)']
507.441	28441.8	0.987569	0.951168	C30H56O2	[M+Hac-H]-	507.442	-0.99	['26:2(5Z,9Z)(13Me,17Me,21Me,25Me)', '29:2(5Z,9Z)(22Me)', '29:2(5Z,9Z)(26Me)', '30:2(9Z,23Z)', 'Lauryl linoleate', 'Linoleyl laurate', 'Myristolel palmitoleate', 'Palmitoleyl myristoleate']
508.274	24065.8	1.12089	0.791258	0
508.473	22651.3	0.721455	0.791258	C32H63NO3	[M-H]-	508.474	-1.04	['N-(Tetradecanoyl)-sphing-4-enine']
508.985	50122.5	0.996781	0.998079	0
509.324	397945	0.859138	0.791258	C30H48O5	[M+Na-2H]-	509.325	-0.83	['NA', 'bayogenin', 'cimigenol']
509.324	397945	0.859138	0.791258	C23H47O6P	[M+Hac-H]-	509.325	-0.91	['PA(P-20:0/0:0)']
509.457	149291	0.87401	0.818844	C30H58O2	[M+Hac-H]-	509.458	-1.13	['26:1(5Z)(13Me,17Me,21Me,25Me)', '30:1(23Z))', 'Lauryl oleate', 'Lumepueic acid', 'Myristoleyl palmitate', 'Myristyl palmitoleate', 'Oleyl laurate', 'Palmitoleyl myristate', 'Palmityl myristoleate']
510.328	105497	0.868782	0.798381	0
510.461	38501.6	0.94979	0.801449	0
511.076	28644.2	0.924414	0.965685	0
511.288	16515.7	0.824713	0.948232	0
511.459	20583	1.31249	0.953489	0
511.462	56299.1	0.83222	0.912352	0
511.465	118630	1.05345	0.984353	0
512.299	25745	1.94216	0.817102	C21H44NO7P	[M+Hac-H]-	512.299	-0.38	['LysoPE(16:0/0:0)', 'PC(13:0/0:0)']
512.476	1.83484e+06	1.05528	0.998079	0
512.972	34418	1.01694	0.836222	0
514.447	33253.8	0.993048	0.993041	0
514.483	24108.3	0.961237	0.999284	0
515.257	82200.4	1.00931	0.996627	0
516.417	35049.5	0.998606	0.999467	0
516.984	28532.4	0.964105	0.953849	0
517.253	46103	1.09141	0.988311	0
517.348	32360.3	0.839098	0.802357	0
517.374	34710.5	1.01801	0.791258	0
518.384	22130.9	0.747445	0.801449	0
519.405	32493	1.48535	0.830956	C30H52O3	[M+Hac-H]-	519.405	-0.52	['(+)-24-Dammarene-3alpha,12beta,20S-triol', 'Myrrhanol A', 'Protopanaxadiol', 'Taraxastane-3beta,16beta,20beta-triol']
519.442	14838.1	0.967076	0.791258	0
520.408	18294.8	0.707586	0.801449	0
521.384	22594	0.895064	0.830956	C29H50O4	[M+Hac-H]-	521.385	-0.97	['2alpha-(3-Hydroxypropyl)-1alpha,25-dihydroxy-19-norvitamin D3']
521.493	11369.1	1.27753	0.818844	0
523.001	159979	1.18457	0.832212	0
523.256	27411.1	1.11446	0.965685	0
523.4	15569.9	1.04112	0.963051	0
523.473	37452.9	0.863908	0.802357	C31H60O2	[M+Hac-H]-	523.473	-1	['Hentriacontane-14,16-dione', 'Pentadecyl palmitoleate']
525.091	32811.5	2.33681	0.801449	0
525.281	53192.8	1.23296	0.81818	0
525.452	23202.2	1.30796	0.830956	C32H62O5	[M-H]-	525.452	-0.8	['DG(12:0/17:0/0:0)[iso2]', 'DG(13:0/16:0/0:0)[iso2]']
525.488	114714	1.12276	0.951106	C31H62O2	[M+Hac-H]-	525.489	-0.77	['NA', 'D-Mycoceranic acid', 'Mycocerosic acid (C31)', 'Phthioceranic acid (C31)']
526.229	58425.1	0.543815	0.81818	0
526.492	43194.1	0.974456	0.862206	0
527.431	7508.4	0.55583	0.720442	0
527.446	1.14178e+06	0.598809	0.791258	C35H60O3	[M-H]-	527.447	-1.17	['32,35-anhydrobacteriohopaneterol']
527.467	13318.1	1.35539	0.805733	C30H60O3	[M+Hac-H]-	527.468	-1.32	['NA']
528.45	418484	0.607242	0.791258	0
529.349	16736.8	0.822948	0.951168	C30H52O5	[M+(37Cl)]-	529.348	1.5	['NA', 'Xeniasterol-a']
529.43	12811.2	0.824695	0.912748	0
529.462	1.03345e+06	0.754014	0.830956	C35H62O3	[M-H]-	529.463	-1.19	['30-(-2-(O-2-hydroxy-ethane)-3-hydroxy-propane)-hopane']
530.386	49744.4	1.01137	0.999467	0
530.465	380807	0.75406	0.830956	0
530.999	99825.2	1.03537	0.951106	0
531.39	28150.7	1.06008	0.986417	0
531.426	88194.9	0.957516	0.961029	0
531.469	65905.3	0.726814	0.81818	0
532.402	31233.9	1.72005	0.81818	0
532.429	26200.9	1.02308	0.951106	0
533.406	33830.1	1.14353	0.801449	0
533.421	125367	0.872728	0.793308	C33H58O5	[M-H]-	533.421	-0.97	['DG(12:0/18:3(9Z,12Z,15Z)/0:0)[iso2]']
534.424	42660.8	0.829416	0.720442	0
535.365	73093.8	1.11149	0.96082	0
535.465	15029	1.26573	0.801449	0
535.473	213944	1.01048	0.993974	C32H60O2	[M+Hac-H]-	535.473	-1	['Linoleyl myristate', 'Myristoleyl oleate', 'Myristyl linoleate', 'Oleyl myristoleate', 'Palmitoleyl palmitoleate']
536.476	75899	1.02758	0.998079	0
536.504	69651.1	0.733205	0.730251	C34H67NO3	[M-H]-	536.505	-0.93	['Ceramide (d18:1/16:0)']
537.016	449137	0.997636	0.985501	0
537.416	19812.8	1.10057	0.956705	0
537.488	486637	1.01743	0.951168	C32H62O2	[M+Hac-H]-	537.489	-1.09	['NA', 'Myristoleyl stearate', 'Myristyl oleate', 'Oleyl myristate', 'Palmitoleyl palmitate', 'Palmityl palmitoleate', 'Stearyl myristoleate']
537.507	24244.4	0.66055	0.720442	0
538.019	64079.6	0.963763	0.953489	0
538.492	175159	1.02363	0.951168	0
539.107	46502.3	1.01248	0.979886	0
539.335	307908	1.32374	0.830956	C24H49O7P	[M+Hac-H]-	539.335	-0.98	['PA(21:0/0:0)']
539.335	307908	1.32374	0.830956	C26H53O9P	[M-H]-	539.335	-0.98	['PG(20:0/0:0)']
539.414	20355.7	0.894503	0.843346	0
539.431	12514.6	0.717603	0.817102	0
539.492	68281.4	1.03096	0.985501	0
539.503	6.38508e+06	0.666442	0.791258	C32H64O2	[M+Hac-H]-	539.504	-1.88	['NA', '1-Hexadecyl hexadecanoate', 'Arachidyl laurate', 'Lacceroic acid', 'Lauryl arachidate', 'Mycocerosic acid (C32)', 'Myristyl stearate', 'Stearyl myristate']
539.514	34986	0.860978	0.862206	0
540.244	63638.3	0.427813	0.720442	0
540.507	2.70398e+06	1.12163	0.89123	0
540.519	8593.11	1.10924	0.912748	0
541.429	17514.8	0.945958	0.998079	0
541.447	31249.5	1.30894	0.830956	C30H58O4	[M+Hac-H]-	541.447	-1.06	['Triacontanedioic acid']
541.511	433815	1.10271	0.890574	0
542.478	80339.2	0.934905	0.80329	0
543.365	24238.2	1.14192	0.76838	C31H54O5	[M+(37Cl)]-	543.364	1.74	['(20R)-24-Hydroxy-19-norgeminivitamin D3', '(20S)-24-Hydroxy-19-norgeminivitamin D3']
543.445	322081	0.885702	0.801449	0
543.482	24535.7	0.92862	0.830956	0
545.015	168684	0.958239	0.956705	0
545.406	24025	0.930357	0.801449	0
546.018	25079.2	0.919117	0.951106	0
546.324	38421.3	0.95318	0.801449	0
547.105	22209.1	0.86877	0.951168	0
547.235	67650	0.748775	0.951168	0
547.321	180542	0.908857	0.81818	0
548.324	47715.2	0.901052	0.823931	0
549.339	16476.5	0.345877	0.720442	0
549.415	32441.9	0.958224	0.981048	C31H54O4	[M+Hac-H]-	549.416	-1.1	['Aragusteroketal']
550.52	13929.8	0.560893	0.796789	C35H69NO3	[M-H]-	550.52	-0.96	['Cer(d18:1/17:0)']
551.032	551276	0.954111	0.985501	0
551.504	23481.2	0.854586	0.801449	C33H64O2	[M+Hac-H]-	551.504	-1.19	['Heptadecyl palmitoleate', 'Tritriacontane-16,18-dione']
552.035	83179.3	0.966663	0.985501	0
552.499	30244.2	0.25443	0.805733	0
553.123	64629.3	0.997437	0.98154	0
553.483	50392.8	1.18284	0.830956	C34H66O5	[M-H]-	553.484	-0.97	['DG(12:0/19:0/0:0)[iso2]', 'DG(13:0/18:0/0:0)[iso2]', 'DG(14:0/17:0/0:0)[iso2]', 'DG(15:0/16:0/0:0)']
553.52	59908.8	0.939403	0.817102	C33H66O2	[M+Hac-H]-	553.52	-1.04	['NA', 'Heptadecyl-palmitate', 'Mycocerosic acid (C33)', 'Phthioceranic acid (C33)', 'Psyllic acid']
554.346	30132.3	0.857172	0.801449	C24H50NO7P	[M+Hac-H]-	554.346	-0.88	['LysoPC(16:0)', 'PC(0:0/16:0)', 'PC(16:0/0:0)[rac]', 'PC(O-14:0/2:0)', 'PE(19:0/0:0)']
554.479	58324.5	0.682721	0.791258	0
554.515	49261.2	0.786046	0.76838	C34H69NO4	[M-H]-	554.515	-0.62	['Cer(t18:0/16:0)']
555.213	51599	0.98206	0.985501	0
555.499	20328.1	0.938249	0.801449	0
557.38	8698.37	0.563378	0.791258	0
557.406	65370.3	0.920095	0.961029	0
558.41	12049.2	1.49943	0.830956	0
559.421	30936.8	0.903164	0.962331	0
559.44	25936.1	0.851795	0.76838	0
561.121	22391.4	0.868	0.9329	0
561.437	29577.2	1.00037	0.951168	0
561.452	37495.3	1.07	0.829772	C35H62O5	[M-H]-	561.452	-0.94	['DG(12:0/20:3(8Z,11Z,14Z)/0:0)[iso2]', 'DG(14:0/18:3(9Z,12Z,15Z)/0:0)', 'DG(14:1(9Z)/18:2(9Z,12Z)/0:0)', 'DG(15:1(9Z)/17:2(9Z,12Z)/0:0)[iso2]', 'bacteriohopane-31,32,33,34,35-pentol']
561.486	385231	0.974735	0.791258	0
562.489	136997	0.978062	0.801449	0
563.296	10571.4	0.515106	0.76838	0
563.397	71484.6	0.978632	0.980936	0
563.431	18335.5	0.803425	0.801449	0
563.504	95799.6	0.88211	0.801449	C34H64O2	[M+Hac-H]-	563.504	-0.98	['Linoleyl palmitate', 'Oleyl palmitoleate', 'Palmitoleyl oleate', 'Palmityl linoleate']
564.344	151667	0.957632	0.993041	0
564.507	37072.1	0.88977	0.801449	0
564.536	40179.4	0.722072	0.725065	C36H71NO3	[M-H]-	564.536	-0.85	['Cer(d18:0/18:1(9Z))', 'Ceramide (d18:1/18:0)']
565.347	50616.7	1.03439	0.993974	0
565.52	190686	0.874889	0.801449	C34H66O2	[M+Hac-H]-	565.52	-1.05	['NA', 'Arachidyl myristoleate', 'Elaidyl palmitate', 'Myristoleyl arachidate', 'Oleyl palmitate', 'Palmitoleyl stearate', 'Palmityl elaidate', 'Palmityl oleate', 'Stearyl palmitoleate']
565.539	13916.6	0.55115	0.791258	0
566.523	74687.3	0.861397	0.81818	0
567.027	28007.5	1.13264	0.977967	0
567.138	51180.5	0.995265	0.990471	0
567.522	22155.2	0.921066	0.801449	0
567.535	1.59865e+06	0.961611	0.802357	C34H68O2	[M+Hac-H]-	567.536	-1.06	['Arachidyl myristate', 'Behenyl laurate', 'Gheddic acid', 'Lauryl behenate', 'Mycocerosic acid (C34)', 'Myristyl arachidate', 'Palmityl stearate', 'Phthioceranic acid (C34)', 'Stearyl palmitate']
568.494	65064.4	0.623312	0.720442	C32H63NO3	[M+Hac-H]-	568.495	-0.89	['N-(Tetradecanoyl)-sphing-4-enine']
568.526	8696.76	0.833864	0.720442	0
568.539	589440	0.951186	0.817102	0
569.229	104617	0.953608	0.967019	C26H45O9P	[M+K-2H]-	569.229	0.56	['PG(20:4(5Z,8Z,11Z,14Z)/0:0)']
569.46	27109.7	0.851438	0.81818	0
569.497	22707	0.540165	0.720442	0
569.542	103761	0.950287	0.81818	0
570.51	117980	0.882202	0.801449	C32H65NO3	[M+Hac-H]-	570.51	-0.87	['Cer(d18:0/14:0)']
571.403	47065.9	0.858011	0.76838	0
571.513	43621.4	0.974256	0.818844	0
572.407	13427.6	0.889541	0.882498	C29H62NO6P	[M+Na-2H]-	572.406	1.34	['PC(O-20:0/O-1:0)']
572.481	43899.2	0.591917	0.720442	C34H67NO3	[M+Cl]-	572.481	-1.18	['Ceramide (d18:1/16:0)']
573.437	34661.1	0.8934	0.912352	C32H62O8	[M-H]-	573.437	-0.84	['NA']
576.33	32467.6	1.29615	0.720442	C26H48NO7P	[M+Hac-H]-	576.331	-0.88	['LysoPC(18:3(6Z,9Z,12Z))', 'LysoPC(18:3(9Z,12Z,15Z))']
576.33	32467.6	1.29615	0.720442	C28H52NO9P	[M-H]-	576.331	-0.88	['PS(22:2(13Z,16Z)/0:0)']
577.228	33623.3	1.00722	0.953489	C23H42O14	[M+Cl]-	577.227	1.44	['NA']
577.37	39502.1	0.550343	0.76838	0
577.447	16297	0.618728	0.76838	0
579.347	101895	0.791073	0.812706	C33H52O6	[M+Cl]-	579.346	1.98	['11alpha-Hemiglutaryloxy-1,25-dihydroxyvitamin D3']
579.462	9703.64	0.409948	0.720442	0
580.4	25963.4	0.577732	0.801449	0
581.042	21471.5	1.36391	0.953489	0
582.51	114301	0.617657	0.720442	C33H65NO3	[M+Hac-H]-	582.51	-0.68	['Cer(d16:1/17:0)']
582.546	30600.4	0.955946	0.951168	0
583.245	159710	0.931436	0.912352	0
583.44	18164.4	1.06616	0.983199	0
583.513	40732.9	0.579255	0.720442	0
584.248	41399.3	0.989524	0.959477	0
584.525	37558.6	0.170387	0.00736117	C33H67NO3	[M+Hac-H]-	584.526	-0.92	['Cer(d18:0/15:0)']
585.437	22483.1	0.791921	0.791258	0
585.51	35092.8	0.728766	0.860466	0
585.529	10232.9	0.0336595	0.0123865	0
590.52	35442.1	0.983557	0.791258	0
590.551	25009.6	0.673213	0.720442	C38H73NO3	[M-H]-	590.552	-0.96	['Cer(d18:2/20:0)']
591.386	13955.5	0.441371	0.791258	0
592.567	123782	0.77835	0.791258	C38H75NO3	[M-H]-	592.567	-0.81	['Cer(d16:1/22:0)', 'Ceramide (d18:1/20:0)']
593.57	48982.1	0.749832	0.76838	0
595.541	21926.9	0.431307	0.720442	0
596.525	84763.3	0.661722	0.76838	C34H67NO3	[M+Hac-H]-	596.526	-0.9	['Ceramide (d18:1/16:0)']
597.26	31160.1	0.868029	0.96283	C28H49O9P	[M+K-2H]-	597.26	0.45	['PG(22:4(7Z,10Z,13Z,16Z)/0:0)']
598.505	31609	0.583337	0.812706	0
598.541	95008.8	0.807859	0.76838	C34H69NO3	[M+Hac-H]-	598.542	-1.08	['Cer(d18:0/16:0)']
599.435	86490.4	0.883412	0.801449	0
604.461	36981.7	0.861452	0.791258	0
605.004	62018	0.992003	0.951168	0
607.494	38218.5	0.606706	0.712796	0
611.276	47918.4	0.980037	0.993041	0
612.556	11796.3	0.0290404	0.0793767	C35H71NO3	[M+Hac-H]-	612.557	-1.25	['Cer(d18:0/17:0)']
615.477	27563	0.703379	0.76838	C40H60O	[M+Hac-H]-	615.478	-1.57	['Chloroxanthin']
615.477	27563	0.703379	0.76838	C36H68O5	[M+Cl]-	615.476	1.99	['DG(13:0/20:1(11Z)/0:0)[iso2]', 'DG(14:1(9Z)/19:0/0:0)[iso2]', 'DG(15:0/18:1(9Z)/0:0)', 'DG(15:1(9Z)/18:0/0:0)[iso2]', 'DG(16:0/17:1(9Z)/0:0)[iso2]', 'DG(16:1(9Z)/17:0/0:0)[iso2]']
616.461	93865.5	1.12866	0.802357	0
618.477	186412	0.874662	0.801449	0
619.019	101546	0.960349	0.951168	0
619.48	67041.4	0.875987	0.81818	C34H68O9	[M-H]-	619.479	1.73	['NA']
623.573	20553.3	0.48355	0.791258	0
627.018	40224.1	0.986852	0.953489	0
630.477	25374.7	0.480242	0.720442	0
632.493	55792.9	0.709335	0.81818	0
634.471	86556.6	0.968712	0.999284	0
647.511	13753.2	0.393404	0.509688	C36H72O9	[M-H]-	647.51	1.53	['NA']
648.487	45642.2	0.659873	0.76838	0
666.605	51603.8	0.632692	0.801449	C39H77NO3	[M+Hac-H]-	666.604	0.81	['Cer(d16:1/23:0)']
669.568	38967	1.12771	0.951106	C38H74O5	[M+Hac-H]-	669.567	0.91	['DG(13:0/22:0/0:0)[iso2]', 'DG(14:0/21:0/0:0)[iso2]', 'DG(15:0/20:0/0:0)', 'DG(16:0/19:0/0:0)[iso2]', 'DG(17:0/18:0/0:0)[iso2]']
671.49	158795	0.697095	0.720442	C39H64O5	[M+Hac-H]-	671.489	0.7	['DG(14:0/22:6(4Z,7Z,10Z,13Z,16Z,19Z)/0:0)', 'DG(14:1(9Z)/22:5(7Z,10Z,13Z,16Z,19Z)/0:0)', 'DG(16:1(9Z)/20:5(5Z,8Z,11Z,14Z,17Z)/0:0)', 'DG(18:3(6Z,9Z,12Z)/18:3(6Z,9Z,12Z)/0:0)', 'DG(18:3(6Z,9Z,12Z)/18:3(9Z,12Z,15Z)/0:0)', 'DG(18:3(9Z,12Z,15Z)/18:3(9Z,12Z,15Z)/0:0)', 'DG(18:4(6Z,9Z,12Z,15Z)/18:2(9Z,12Z)/0:0)']
672.493	70359.9	0.65246	0.749274	C35H74NO6P	[M+(37Cl)]-	672.492	1.59	['PE-NMe2(O-14:0/O-14:0)']
673.505	96849.9	0.692055	0.730251	C39H66O5	[M+Hac-H]-	673.505	0.64	['DG(14:0/22:5(7Z,10Z,13Z,16Z,19Z)/0:0)', 'DG(14:1(9Z)/22:4(7Z,10Z,13Z,16Z)/0:0)', 'DG(16:0/20:5(5Z,8Z,11Z,14Z,17Z)/0:0)', 'DG(16:1(9Z)/20:4(5Z,8Z,11Z,14Z)/0:0)', 'DG(18:2(9Z,12Z)/18:3(9Z,12Z,15Z)/0:0)', 'DG(18:3(6Z,9Z,12Z)/18:2(9Z,12Z)/0:0)', 'DG(18:4(6Z,9Z,12Z,15Z)/18:1(9Z)/0:0)']
674.509	36869.9	0.62089	0.791258	0
675.521	182456	0.70667	0.720442	C39H68O5	[M+Hac-H]-	675.521	0.48	['DG(14:0/22:4(7Z,10Z,13Z,16Z)/0:0)', 'DG(14:1(9Z)/22:3(10Z,13Z,16Z)/0:0)[iso2]', 'DG(16:0/20:4(5Z,8Z,11Z,14Z)/0:0)', 'DG(16:1(9Z)/20:3(8Z,11Z,14Z)/0:0)', 'DG(18:1(9Z)/18:3(9Z,12Z,15Z)/0:0)', 'DG(18:2(9Z,12Z)/18:2(9Z,12Z)/0:0)', 'DG(18:3(6Z,9Z,12Z)/18:1(9Z)/0:0)', 'DG(18:4(6Z,9Z,12Z,15Z)/18:0/0:0)']
676.524	78165.4	0.679195	0.720442	0
677.537	108537	0.690004	0.720442	C39H70O5	[M+Hac-H]-	677.536	1.11	['DG(14:0/22:3(10Z,13Z,16Z)/0:0)[iso2]', 'DG(14:1(9Z)/22:2(13Z,16Z)/0:0)', 'DG(16:0/20:3(8Z,11Z,14Z)/0:0)', 'DG(16:1(9Z)/20:2(11Z,14Z)/0:0)', 'DG(18:0/18:3(9Z,12Z,15Z)/0:0)', 'DG(18:1(9Z)/18:2(9Z,12Z)/0:0)', 'DG(18:3(6Z,9Z,12Z)/18:0/0:0)', 'DG(19:1(9Z)/17:2(9Z,12Z)/0:0)[iso2]']
679.551	42179.2	0.515374	0.652474	C39H72O5	[M+Hac-H]-	679.552	-0.59	['DG(14:0/22:2(13Z,16Z)/0:0)', 'DG(14:1(9Z)/22:1(11Z)/0:0)[iso2]', 'DG(16:0/20:2(11Z,14Z)/0:0)', 'DG(16:1(9Z)/20:1(11Z)/0:0)', 'DG(17:2(9Z,12Z)/19:0/0:0)[iso2]', 'DG(18:0/18:2(9Z,12Z)/0:0)', 'DG(18:1(9Z)/18:1(9Z)/0:0)', 'DG(19:1(9Z)/17:1(9Z)/0:0)[iso2]']
679.661	25986.9	0.674296	0.80329	C42H84O2	[M+Hac-H]-	679.661	0.29	['NA', 'Arachidyl behenate', 'Behenyl arachidate', 'Hexacosyl-palmitate', 'Phthioceranic acid (C42)']
680.62	69234.4	0.549022	0.801449	C40H79NO3	[M+Hac-H]-	680.62	0.19	['Ceramide (d18:1/22:0)']
682.599	65077.2	1.00505	0.953489	0
684.461	42936.2	0.967068	0.999467	C37H68NO8P	[M-H]-	684.461	0.5	['PE(12:0/20:3(8Z,11Z,14Z))', 'PE(14:0/18:3(6Z,9Z,12Z))', 'PE(14:0/18:3(9Z,12Z,15Z))', 'PE(14:1(9Z)/18:2(9Z,12Z))', 'PE(15:1(9Z)/17:2(9Z,12Z))', 'PE(17:2(9Z,12Z)/15:1(9Z))', 'PE(18:2(9Z,12Z)/14:1(9Z))', 'PE(18:3(6Z,9Z,12Z)/14:0)', 'PE(18:3(9Z,12Z,15Z)/14:0)', 'PE(20:3(8Z,11Z,14Z)/12:0)']
686.477	21054.6	0.353528	0.720442	C37H70NO8P	[M-H]-	686.477	0.54	['PC(12:0/17:2(9Z,12Z))', 'PC(14:1(9Z)/15:1(9Z))', 'PC(15:1(9Z)/14:1(9Z))', 'PC(17:2(9Z,12Z)/12:0)', 'PE(12:0/20:2(11Z,14Z))', 'PE(14:0/18:2(9Z,12Z))', 'PE(14:1(9Z)/18:1(9Z))', 'PE(15:0/17:2(9Z,12Z))', 'PE(15:1(9Z)/17:1(9Z))', 'PE(16:1(11Z)/16:1(11Z))', 'PE(16:1(5Z)/16:1(5Z))', 'PE(16:1(9Z)/16:1(9Z))', 'PE(17:1(9Z)/15:1(9Z))', 'PE(17:2(9Z,12Z)/15:0)', 'PE(18:1(9Z)/14:1(9Z))', 'PE(18:2(9Z,12Z)/14:…
689.259	17815.7	0.318744	0.536784	0
693.192	39080.5	0.42286	0.720442	0
695.189	37953.1	0.477404	0.791258	0
696.496	169088	1.06804	0.801449	C39H72NO7P	[M-H]-	696.497	-1.56	['NA', 'PE(O-16:0/18:4(6Z,9Z,12Z,15Z))', 'PE(P-16:0/18:3(6Z,9Z,12Z))', 'PE(P-16:0/18:3(9Z,12Z,15Z))']
696.496	169088	1.06804	0.801449	C37H74NO7P	[M+Na-2H]-	696.495	1.89	['PC(P-16:0/13:0)', 'PE(O-16:0/16:1(9Z))', 'PE(O-18:0/14:1(9Z))', 'PE(P-16:0e/16:0)', 'PE(P-18:0/14:0)', 'PE(P-20:0/12:0)']
697.5	68772.4	1.14365	0.791258	0
698.513	146682	1.03897	0.801449	C39H74NO7P	[M-H]-	698.513	-0.24	['PE(O-16:0/18:3(6Z,9Z,12Z))', 'PE(O-16:0/18:3(9Z,12Z,15Z))', 'PE(P-16:0/18:2(9Z,12Z))']
699.515	64713	0.996078	0.830956	0
700.529	47023.8	1.04194	0.801449	C39H76NO7P	[M-H]-	700.529	0.68	['PC(P-16:0/15:1(9Z))', 'PE(O-16:0/18:2(9Z,12Z))', 'PE(P-16:0/18:1(9Z))', 'PE(P-18:0/16:1(9Z))', 'PE(P-20:0/14:1(9Z))', 'PnE(16:0/18:1(9Z))']
701.495	36024.1	1.15708	0.950334	0
710.476	146288	1.02786	0.951168	C39H70NO8P	[M-H]-	710.477	-0.25	['PC(13:0/18:4(6Z,9Z,12Z,15Z))', 'PC(18:4(6Z,9Z,12Z,15Z)/13:0)', 'PE(12:0/22:4(7Z,10Z,13Z,16Z))', 'PE(14:0/20:4(5Z,8Z,11Z,14Z))', 'PE(14:1(9Z)/20:3(8Z,11Z,14Z))', 'PE(16:0/18:4(6Z,9Z,12Z,15Z))', 'PE(16:1(9Z)/18:3(6Z,9Z,12Z))', 'PE(16:1(9Z)/18:3(9Z,12Z,15Z))', 'PE(17:2(9Z,12Z)/17:2(9Z,12Z))', 'PE(18:3(6Z,9Z,12Z)/16:1(9Z))', 'PE(18:3(9Z,12Z,15Z)/16:1(9Z))', 'PE(18:4(6Z,9Z,12Z,15Z)/16:0)', 'PE(20:3(…
711.48	66282	1.01995	0.981048	0
712.492	738046	1.02467	0.852907	C39H72NO8P	[M-H]-	712.492	-0.04	['PC(13:0/18:3(6Z,9Z,12Z))', 'PC(13:0/18:3(9Z,12Z,15Z))', 'PC(14:1(9Z)/17:2(9Z,12Z))', 'PC(17:2(9Z,12Z)/14:1(9Z))', 'PC(18:3(6Z,9Z,12Z)/13:0)', 'PC(18:3(9Z,12Z,15Z)/13:0)', 'PE(14:0/20:3(8Z,11Z,14Z))', 'PE(14:1(9Z)/20:2(11Z,14Z))', 'PE(16:0/18:3(6Z,9Z,12Z))', 'PE(16:0/18:3(9Z,12Z,15Z))', 'PE(16:1(9Z)/18:2(9Z,12Z))', 'PE(17:1(9Z)/17:2(9Z,12Z))', 'PE(17:2(9Z,12Z)/17:1(9Z))', 'PE(18:2(9Z,12Z)/16:1(9…
713.496	292108	1.01703	0.909213	0
715.576	116271	1.00112	0.867765	C40H81N2O6P	[M-H]-	715.576	0.59	['SM(d18:1/17:0)', 'SM(d19:1/16:0)']
716.58	53690.4	1.0304	0.805733	0
717.582	11196.6	0.909903	0.956705	0
718.54	113340	1.02538	0.801449	C39H78NO8P	[M-H]-	718.539	0.71	['PC(10:0/21:0)', 'PC(11:0/20:0)', 'PC(12:0/19:0)', 'PC(13:0/18:0)', 'PC(14:0/17:0)', 'PC(15:0/16:0)', 'PC(16:0/15:0)', 'PC(17:0/14:0)', 'PC(18:0/13:0)', 'PC(19:0/12:0)', 'PC(20:0/11:0)', 'PC(21:0/10:0)', 'PC(9:0/22:0)', 'PE(12:0/22:0)', 'PE(13:0/21:0)', 'PE(14:0/20:0)', 'PE(15:0/19:0)', 'PE(16:0/18:0)', 'PE(17:0/17:0)', 'PE(18:0/16:0)', 'PE(19:0/15:0)', 'PE(20:0/14:0)', 'PE(21:0/13:0)', 'PE(22:0…
719.396	5499.2	0.946339	0.890574	0
719.448	208633	1.0398	0.76838	0
719.543	44464	1.04146	0.730251	0
719.95	183516	1.03615	0.730529	0
720.456	160588	1.01905	0.791258	0
720.498	31640.2	1.09722	0.720442	C41H72NO7P	[M-H]-	720.497	1.03	['PE(P-16:0/20:5(5Z,8Z,11Z,14Z,17Z))']
720.547	5567.43	1.38076	0.720442	0
720.958	140274	1.01414	0.76838	0
721.501	15587.3	1.09651	0.720442	0
721.966	53905.9	0.985619	0.76838	0
722.467	19175.5	1.14519	0.852907	0
722.514	38419.1	1.09026	0.720442	C41H74NO7P	[M-H]-	722.513	0.71	['PE(O-16:0/20:5(5Z,8Z,11Z,14Z,17Z))', 'PE(P-16:0/20:4(5Z,8Z,11Z,14Z))', 'PE(P-18:0/18:4(6Z,9Z,12Z,15Z))']
722.974	10603.9	1.32357	0.862206	0
723.517	17455.6	1.06597	0.830956	0
724.493	111994	1.06246	0.831743	C40H72NO8P	[M-H]-	724.492	0.7	['PC(12:0/20:4(5Z,8Z,11Z,14Z))', 'PC(14:0/18:4(6Z,9Z,12Z,15Z))', 'PC(14:0/18:4(9E,11E,13E,15E))', 'PC(14:1(9Z)/18:3(6Z,9Z,12Z))', 'PC(14:1(9Z)/18:3(9Z,12Z,15Z))', 'PC(16:0/16:4(2E,4E,12E,14E))', 'PC(16:2(2E,4E)/16:2(2E,4E))', 'PC(18:3(6Z,9Z,12Z)/14:1(9Z))', 'PC(18:3(9Z,12Z,15Z)/14:1(9Z))', 'PC(18:4(6Z,9Z,12Z,15Z)/14:0)', 'PC(20:4(5Z,8Z,11Z,14Z)/12:0)', 'PE(13:0/22:4(7Z,10Z,13Z,16Z))', 'PE(15:0/20…
724.529	84388.2	1.042	0.801449	C41H76NO7P	[M-H]-	724.529	0.71	['PE(O-16:0/20:4(5Z,8Z,11Z,14Z))', 'PE(O-18:0/18:4(6Z,9Z,12Z,15Z))', 'PE(P-16:0/20:3(8Z,11Z,14Z))', 'PE(P-18:0/18:3(6Z,9Z,12Z))', 'PE(P-18:0/18:3(9Z,12Z,15Z))']
725.532	38502.6	1.04492	0.791258	0
726.508	174729	1.03011	0.801449	C40H74NO8P	[M-H]-	726.508	0.69	['PC(12:0/20:3(8Z,11Z,14Z))', 'PC(14:0/18:3(6Z,9Z,12Z))', 'PC(14:0/18:3(9Z,12Z,15Z))', 'PC(14:1(9Z)/18:2(9Z,12Z))', 'PC(15:1(9Z)/17:2(9Z,12Z))', 'PC(17:2(9Z,12Z)/15:1(9Z))', 'PC(18:2(9Z,12Z)/14:1(9Z))', 'PC(18:3(6Z,9Z,12Z)/14:0)', 'PC(18:3(9Z,12Z,15Z)/14:0)', 'PC(20:3(8Z,11Z,14Z)/12:0)', 'PE(15:0/20:3(8Z,11Z,14Z))', 'PE(15:1(9Z)/20:2(11Z,14Z))', 'PE(17:0/18:3(6Z,9Z,12Z))', 'PE(17:0/18:3(9Z,12Z,15…
727.512	74546.5	1.02435	0.830956	0
727.548	24429.3	1.00686	0.720442	0
728.524	91196.7	1.04704	0.76838	C40H76NO8P	[M-H]-	728.524	0.27	['PC(12:0/20:2(11Z,14Z))', 'PC(14:0/18:2(11Z,14Z))', 'PC(14:0/18:2(9Z,12Z))', 'PC(14:1(9Z)/18:1(9Z))', 'PC(15:0/17:2(9Z,12Z))', 'PC(15:1(9Z)/17:1(9Z))', 'PC(16:1(9E)/16:1(9E))', 'PC(16:1(9Z)/16:1(9Z))', 'PC(17:1(9Z)/15:1(9Z))', 'PC(17:2(9Z,12Z)/15:0)', 'PC(18:1(9Z)/14:1(9Z))', 'PC(18:2(9Z,12Z)/14:0)', 'PC(20:2(11Z,14Z)/12:0)', 'PE(13:0/22:2(13Z,16Z))', 'PE(15:0/20:2(11Z,14Z))', 'PE(15:1(9Z)/20:1(…
729.527	40979.2	1.0418	0.791258	0
729.592	17691.5	1.08434	0.801449	C41H83N2O6P	[M-H]-	729.592	1	['SM(d16:1/20:0)', 'SM(d18:0/18:1(9Z))', 'SM(d18:1/18:0)']
731.543	32012	1.0355	0.801449	0
733.55	31001.8	1.00261	0.89123	C49H76O2	[M+(37Cl)]-	733.551	-0.9	['22:6 Cholesteryl ester']
733.55	31001.8	1.00261	0.89123	C37H75N2O6P	[M+Hac-H]-	733.55	0.26	['SM(d16:1/16:0)', 'SM(d18:1/14:0)']
734.455	10923.6	1.0428	0.928423	C38H70NO8P	[M+Cl]-	734.453	1.99	['PC(12:0/18:3(6Z,9Z,12Z))', 'PC(12:0/18:3(9Z,12Z,15Z))', 'PC(18:3(6Z,9Z,12Z)/12:0)', 'PC(18:3(9Z,12Z,15Z)/12:0)', 'PE(13:0/20:3(8Z,11Z,14Z))', 'PE(15:0/18:3(6Z,9Z,12Z))', 'PE(15:0/18:3(9Z,12Z,15Z))', 'PE(15:1(9Z)/18:2(9Z,12Z))', 'PE(16:1(9Z)/17:2(9Z,12Z))', 'PE(17:2(9Z,12Z)/16:1(9Z))', 'PE(18:2(9Z,12Z)/15:1(9Z))', 'PE(18:3(6Z,9Z,12Z)/15:0)', 'PE(18:3(9Z,12Z,15Z)/15:0)', 'PE(20:3(8Z,11Z,14Z)/13:0…
734.477	1.29504e+06	1.03738	0.830956	C41H70NO8P	[M-H]-	734.477	0.22	['PE(14:0/22:6(4Z,7Z,10Z,13Z,16Z,19Z))', 'PE(16:1(9Z)/20:5(5Z,8Z,11Z,14Z,17Z))', 'PE(18:2(9Z,12Z)/18:4(6Z,9Z,12Z,15Z))', 'PE(18:3(6Z,9Z,12Z)/18:3(6Z,9Z,12Z))', 'PE(18:3(6Z,9Z,12Z)/18:3(9Z,12Z,15Z))', 'PE(18:3(9Z,12Z,15Z)/18:3(6Z,9Z,12Z))', 'PE(18:3(9Z,12Z,15Z)/18:3(9Z,12Z,15Z))', 'PE(18:4(6Z,9Z,12Z,15Z)/18:2(9Z,12Z))', 'PE(20:5(5Z,8Z,11Z,14Z,17Z)/16:1(9Z))', 'PE(22:6(4Z,7Z,10Z,13Z,16Z,19Z)/14:0)']
734.493	9513.52	1.01083	0.818844	0
734.499	3341.19	1.38824	0.801449	0
734.553	12285.7	0.953336	0.76838	0
735.48	562296	1.03061	0.830956	C36H69O9P	[M+Hac-H]-	735.482	-1.91	['PG(P-16:0/14:1(9Z))']
736.462	4522.73	1.47696	0.76838	0
736.478	46732.1	1.02488	0.830956	C35H68NO9P	[M+Hac-H]-	736.477	1.24	['PS(P-16:0/13:0)']
736.493	1.71684e+06	1.05898	0.801449	C41H72NO8P	[M-H]-	736.492	0.37	['PC(13:0/20:5(5Z,8Z,11Z,14Z,17Z))', 'PC(15:1(9Z)/18:4(6Z,9Z,12Z,15Z))', 'PC(18:4(6Z,9Z,12Z,15Z)/15:1(9Z))', 'PC(20:5(5Z,8Z,11Z,14Z,17Z)/13:0)', 'PE(14:1(9Z)/22:4(7Z,10Z,13Z,16Z))', 'PE(16:0/20:5(5Z,8Z,11Z,14Z,17Z))', 'PE(16:1(9Z)/20:4(5Z,8Z,11Z,14Z))', 'PE(18:1(9Z)/18:4(6Z,9Z,12Z,15Z))', 'PE(18:2(9Z,12Z)/18:3(6Z,9Z,12Z))', 'PE(18:2(9Z,12Z)/18:3(9Z,12Z,15Z))', 'PE(18:3(6Z,9Z,12Z)/18:2(9Z,12Z))', …
736.513	7084.14	0.965738	0.925309	C40H77NO8	[M+K-2H]-	736.514	-0.2	['GalCer(d18:1/16:0)', 'GlcCer(d18:1/16:0)']
736.513	7084.14	0.965738	0.925309	C36H72NO8P	[M+Hac-H]-	736.513	-0.04	['PC(10:0/18:0)', 'PC(11:0/17:0)', 'PC(12:0/16:0)', 'PC(13:0/15:0)', 'PC(14:0/14:0)', 'PC(15:0/13:0)', 'PC(16:0/12:0)', 'PC(17:0/11:0)', 'PC(18:0/10:0)', 'PC(19:0/9:0)', 'PC(7:0/21:0)', 'PC(8:0/20:0)', 'PC(9:0/19:0)', 'PE(12:0/19:0)', 'PE(13:0/18:0)', 'PE(14:0/17:0)', 'PE(15:0/16:0)', 'PE(16:0/15:0)', 'PE(17:0/14:0)', 'PE(18:0/13:0)', 'PE(19:0/12:0)']
737.496	770551	1.05144	0.814767	0
738.477	8447.55	0.867151	0.830956	0
738.493	77233.1	1.06908	0.860466	C35H70NO9P	[M+Hac-H]-	738.493	0.25	['PS(O-16:0/13:0)']
738.508	3.04319e+06	1.04348	0.830956	C41H74NO8P	[M-H]-	738.508	-0.34	['PC(13:0/20:4(5Z,8Z,11Z,14Z))', 'PC(15:0/18:4(6Z,9Z,12Z,15Z))', 'PC(15:1(9Z)/18:3(6Z,9Z,12Z))', 'PC(15:1(9Z)/18:3(9Z,12Z,15Z))', 'PC(18:3(6Z,9Z,12Z)/15:1(9Z))', 'PC(18:3(9Z,12Z,15Z)/15:1(9Z))', 'PC(18:4(6Z,9Z,12Z,15Z)/15:0)', 'PC(20:4(5Z,8Z,11Z,14Z)/13:0)', 'PE(14:0/22:4(7Z,10Z,13Z,16Z))', 'PE(16:0/20:4(5Z,8Z,11Z,14Z))', 'PE(16:1(9Z)/20:3(8Z,11Z,14Z))', 'PE(18:0/18:4(6Z,9Z,12Z,15Z))', 'PE(18:1(9…
738.529	13873.8	1.05612	0.932311	C40H79NO8	[M+K-2H]-	738.529	-0.86	['GalCer(d18:0/16:0)', 'GlcCer(d18:0/16:0)']
739.49	15128.7	1.0495	0.802357	C39H75O9P	[M+Na-2H]-	739.49	0.55	['PG(O-16:0/17:2(9Z,12Z))', 'PG(P-16:0/17:1(9Z))', 'PG(P-18:0/15:1(9Z))']
739.512	1.38159e+06	1.04661	0.817102	0
740.493	9003.55	0.994268	0.956705	0
740.509	90918.5	1.02169	0.852907	0
740.523	2.12449e+06	1.03549	0.801449	C41H76NO8P	[M-H]-	740.524	-0.15	['PC(13:0/20:3(8Z,11Z,14Z))', 'PC(15:0/18:3(6Z,9Z,12Z))', 'PC(15:0/18:3(9Z,12Z,15Z))', 'PC(15:1(9Z)/18:2(9Z,12Z))', 'PC(16:1(9Z)/17:2(9Z,12Z))', 'PC(17:2(9Z,12Z)/16:1(9Z))', 'PC(18:2(9Z,12Z)/15:1(9Z))', 'PC(18:3(6Z,9Z,12Z)/15:0)', 'PC(18:3(9Z,12Z,15Z)/15:0)', 'PC(20:3(8Z,11Z,14Z)/13:0)', 'PE(14:1(9Z)/22:2(13Z,16Z))', 'PE(16:0/20:3(8Z,11Z,14Z))', 'PE(16:1(9Z)/20:2(11Z,14Z))', 'PE(17:2(9Z,12Z)/19:1…
740.545	7344.51	1.06207	0.884613	0
740.552	3162.8	1.13137	0.854945	0
741.511	19854.8	1.03925	0.791258	0
741.527	1.01824e+06	1.03288	0.801449	0
741.591	24932.9	1.04433	0.801449	0
741.713	14336.8	0.674255	0.81818	0
742.509	5995.35	1.14282	0.817102	0
742.527	96660.6	1.01535	0.951168	0
742.556	8384.42	1.03763	0.929202	0
742.562	1878.26	1.59506	0.801449	0
742.595	11302.3	1.01603	0.801449	0
743.487	72317.6	0.92488	0.791258	C38H69O8P	[M+Hac-H]-	743.487	0.59	['PA(15:0/20:3(8Z,11Z,14Z))', 'PA(15:1(9Z)/20:2(11Z,14Z))', 'PA(17:0/18:3(6Z,9Z,12Z))', 'PA(17:0/18:3(9Z,12Z,15Z))', 'PA(17:1(9Z)/18:2(9Z,12Z))', 'PA(17:2(9Z,12Z)/18:1(9Z))', 'PA(18:1(9Z)/17:2(9Z,12Z))', 'PA(18:2(9Z,12Z)/17:1(9Z))', 'PA(18:3(6Z,9Z,12Z)/17:0)', 'PA(18:3(9Z,12Z,15Z)/17:0)', 'PA(20:2(11Z,14Z)/15:1(9Z))', 'PA(20:3(8Z,11Z,14Z)/15:0)']
743.487	72317.6	0.92488	0.791258	C40H73O10P	[M-H]-	743.487	0.59	['PG(14:0/20:3(8Z,11Z,14Z))', 'PG(14:1(9Z)/20:2(11Z,14Z))', 'PG(16:0/18:3(6Z,9Z,12Z))', 'PG(16:0/18:3(9Z,12Z,15Z))', 'PG(16:1(9Z)/18:2(9Z,12Z))', 'PG(17:1(9Z)/17:2(9Z,12Z))', 'PG(17:2(9Z,12Z)/17:1(9Z))', 'PG(18:2(9Z,12Z)/16:1(9Z))', 'PG(18:3(6Z,9Z,12Z)/16:0)', 'PG(18:3(9Z,12Z,15Z)/16:0)', 'PG(20:2(11Z,14Z)/14:1(9Z))', 'PG(20:3(8Z,11Z,14Z)/14:0)']
743.527	14021.8	0.952907	0.897949	0
743.608	98365.8	1.0471	0.836142	C42H85N2O6P	[M-H]-	743.607	0.5	['SM(d18:1/19:0)', 'SM(d19:1/18:0)']
744.491	26093.7	0.868987	0.720442	0
744.611	46093.3	1.04903	0.921139	0
745.503	17645.6	0.676868	0.000776478	C47H70O7	[M-H]-	745.505	-1.9	['1-Hydroxy-4-keto-gamma-carotene glucoside/ 1-OH-4-Keto-gamma-carotene glucoside/ (Carotenoid K-G)']
745.503	17645.6	0.676868	0.000776478	C45H66O5	[M+Hac-H]-	745.505	-1.9	['DG(20:5(5Z,8Z,11Z,14Z,17Z)/22:6(4Z,7Z,10Z,13Z,16Z,19Z)/0:0)']
745.503	17645.6	0.676868	0.000776478	C40H75O10P	[M-H]-	745.503	1.27	['LBPA(16:1(9Z)/18:1(9Z))', 'PG(12:0/22:2(13Z,16Z))', 'PG(14:0/20:2(11Z,14Z))', 'PG(14:1(9Z)/20:1(11Z))', 'PG(15:1(9Z)/19:1(9Z))', 'PG(16:0/18:2(9Z,12Z))', 'PG(16:1(9Z)/18:1(9Z))', 'PG(17:0/17:2(9Z,12Z))', 'PG(17:1(9Z)/17:1(9Z))', 'PG(17:2(9Z,12Z)/17:0)', 'PG(18:1(9Z)/16:1(9Z))', 'PG(18:2(9Z,12Z)/16:0)', 'PG(19:1(9Z)/15:1(9Z))', 'PG(20:1(11Z)/14:1(9Z))', 'PG(20:2(11Z,14Z)/14:0)', 'PG(22:2(13Z,16Z…
745.503	17645.6	0.676868	0.000776478	C38H71O8P	[M+Hac-H]-	745.503	1.27	['PA(13:0/22:2(13Z,16Z))', 'PA(15:0/20:2(11Z,14Z))', 'PA(15:1(9Z)/20:1(11Z))', 'PA(16:1(9Z)/19:1(9Z))', 'PA(17:0/18:2(9Z,12Z))', 'PA(17:1(9Z)/18:1(9Z))', 'PA(17:2(9Z,12Z)/18:0)', 'PA(18:0/17:2(9Z,12Z))', 'PA(18:1(9Z)/17:1(9Z))', 'PA(18:2(9Z,12Z)/17:0)', 'PA(19:1(9Z)/16:1(9Z))', 'PA(20:1(11Z)/15:1(9Z))', 'PA(20:2(11Z,14Z)/15:0)', 'PA(22:2(13Z,16Z)/13:0)']
745.614	8715.72	1.21598	0.791258	0
747.461	6612.63	0.864939	0.759791	0
748.493	8475.64	1.19726	0.720442	C42H72NO8P	[M-H]-	748.492	0.75	['PC(12:0/22:6(4Z,7Z,10Z,13Z,16Z,19Z))', 'PC(14:1(9Z)/20:5(5Z,8Z,11Z,14Z,17Z))', 'PC(20:5(5Z,8Z,11Z,14Z,17Z)/14:1(9Z))', 'PC(22:6(4Z,7Z,10Z,13Z,16Z,19Z)/12:0)', 'PE(15:0/22:6(4Z,7Z,10Z,13Z,16Z,19Z))', 'PE(17:1(9Z)/20:5(5Z,8Z,11Z,14Z,17Z))', 'PE(17:2(9Z,12Z)/20:4(5Z,8Z,11Z,14Z))', 'PE(20:4(5Z,8Z,11Z,14Z)/17:2(9Z,12Z))', 'PE(20:5(5Z,8Z,11Z,14Z,17Z)/17:1(9Z))', 'PE(22:6(4Z,7Z,10Z,13Z,16Z,19Z)/15:0)']
748.53	14774.1	1.05911	0.76838	C43H76NO7P	[M-H]-	748.529	1.85	['PE(O-16:0/22:6(4Z,7Z,10Z,13Z,16Z,19Z))', 'PE(P-18:0/20:5(5Z,8Z,11Z,14Z,17Z))']
748.57	14708.4	0.980866	0.965685	C42H81NO8	[M+Na-2H]-	748.571	-1.63	['DGCC(16:0/16:0)', 'GalCer(d18:1/18:0)', 'GlcCer(d18:0/18:1(9Z))', 'GlcCer(d18:1/18:0)']
750.508	20219	1.12992	0.652474	C42H74NO8P	[M-H]-	750.508	0.52	['PC(14:0/20:5(5Z,8Z,11Z,14Z,17Z))', 'PC(14:1(9Z)/20:4(5Z,8Z,11Z,14Z))', 'PC(16:1(9Z)/18:4(6Z,9Z,12Z,15Z))', 'PC(18:4(6Z,9Z,12Z,15Z)/16:1(9Z))', 'PC(20:4(5Z,8Z,11Z,14Z)/14:1(9Z))', 'PC(20:5(5Z,8Z,11Z,14Z,17Z)/14:0)', 'PE(15:1(9Z)/22:4(7Z,10Z,13Z,16Z))', 'PE(17:0/20:5(5Z,8Z,11Z,14Z,17Z))', 'PE(17:1(9Z)/20:4(5Z,8Z,11Z,14Z))', 'PE(17:2(9Z,12Z)/20:3(8Z,11Z,14Z))', 'PE(18:4(6Z,9Z,12Z,15Z)/19:1(9Z))', …
750.545	13412.9	1.01487	0.509688	C43H78NO7P	[M-H]-	750.544	1.07	['PE(O-16:0/22:5(4Z,7Z,10Z,13Z,16Z))', 'PE(O-16:0/22:5(7Z,10Z,13Z,16Z,19Z))', 'PE(O-18:0/20:5(5Z,8Z,11Z,14Z,17Z))', 'PE(O-18:1(1Z)/20:4(5Z,8Z,11Z,14Z))', 'PE(P-16:0/22:4(7Z,10Z,13Z,16Z))', 'PE(P-20:0/18:4(6Z,9Z,12Z,15Z))']
751.512	5853.95	1.28002	0.439848	C37H73O9P	[M+Hac-H]-	751.513	-1.62	['PG(O-16:0/15:1(9Z))', 'PG(P-16:0/15:0)', 'PG(P-18:0/13:0)']
752.524	70857.4	1.09849	0.652474	C42H76NO8P	[M-H]-	752.524	0.92	['PC(12:0/22:4(7Z,10Z,13Z,16Z))', 'PC(14:0/20:4(5Z,8Z,11Z,14Z))', 'PC(14:1(9Z)/20:3(8Z,11Z,14Z))', 'PC(16:0/18:4(6Z,9Z,12Z,15Z))', 'PC(16:0/18:4(9E,11E,13E,15E))', 'PC(16:0/18:4(9Z,11E,13E,15Z))', 'PC(16:0/18:4(9Z,11Z,13Z,15Z))', 'PC(16:1(9Z)/18:3(6Z,9Z,12Z))', 'PC(16:1(9Z)/18:3(9Z,12Z,15Z))', 'PC(16:2(2E,4E)/18:2(2E,4E))', 'PC(17:2(9Z,12Z)/17:2(9Z,12Z))', 'PC(18:3(6Z,9Z,12Z)/16:1(9Z))', 'PC(18:3…
752.561	34224.2	1.05988	0.801449	C43H80NO7P	[M-H]-	752.56	0.82	['PC(O-15:0/20:4(5Z,8Z,11Z,14Z))', 'PE(O-16:0/22:4(7Z,10Z,13Z,16Z))', 'PE(O-18:0/20:4(5Z,8Z,11Z,14Z))', 'PE(O-20:0/18:4(6Z,9Z,12Z,15Z))', 'PE(P-18:0/20:3(8Z,11Z,14Z))', 'PE(P-20:0/18:3(6Z,9Z,12Z))', 'PE(P-20:0/18:3(9Z,12Z,15Z))']
753.527	30861.5	1.07454	0.951168	0
753.564	16089.2	1.06447	0.801449	0
754.54	81143.5	1.09501	0.628837	C42H78NO8P	[M-H]-	754.539	0.54	['PC(14:0/20:3(8Z,11Z,14Z))', 'PC(14:1(9Z)/20:2(11Z,14Z))', 'PC(16:0/18:3(6Z,9Z,12Z))', 'PC(16:0/18:3(9Z,12Z,15Z))', 'PC(16:1(9Z)/18:2(9Z,12Z))', 'PC(17:1(9Z)/17:2(9Z,12Z))', 'PC(17:2(9Z,12Z)/17:1(9Z))', 'PC(18:2(9Z,12Z)/16:1(9Z))', 'PC(18:3(6Z,9Z,12Z)/16:0)', 'PC(18:3(9Z,12Z,15Z)/16:0)', 'PC(20:2(11Z,14Z)/14:1(9Z))', 'PC(20:3(8Z,11Z,14Z)/14:0)', 'PE(15:1(9Z)/22:2(13Z,16Z))', 'PE(17:0/20:3(8Z,11Z…
754.576	13871.4	1.00497	0.80334	C43H82NO7P	[M-H]-	754.576	1.03	['PC(P-18:0/17:2(9Z,12Z))', 'PE(O-18:0/20:3(8Z,11Z,14Z))', 'PE(O-20:0/18:3(6Z,9Z,12Z))', 'PE(O-20:0/18:3(9Z,12Z,15Z))', 'PE(P-16:0/22:2(13Z,16Z))', 'PE(P-18:0/20:2(11Z,14Z))', 'PE(P-20:0/18:2(9Z,12Z))']
755.543	37493.6	1.07266	0.720442	0
756.482	10188.6	1.22191	0.801449	C38H68NO8P	[M+Hac-H]-	756.482	-0.54	['PC(12:0/18:4(6Z,9Z,12Z,15Z))', 'PC(18:4(6Z,9Z,12Z,15Z)/12:0)', 'PE(13:0/20:4(5Z,8Z,11Z,14Z))', 'PE(15:0/18:4(6Z,9Z,12Z,15Z))', 'PE(15:1(9Z)/18:3(6Z,9Z,12Z))', 'PE(15:1(9Z)/18:3(9Z,12Z,15Z))', 'PE(18:3(6Z,9Z,12Z)/15:1(9Z))', 'PE(18:3(9Z,12Z,15Z)/15:1(9Z))', 'PE(18:4(6Z,9Z,12Z,15Z)/15:0)', 'PE(20:4(5Z,8Z,11Z,14Z)/13:0)']
756.482	10188.6	1.22191	0.801449	C40H72NO10P	[M-H]-	756.482	-0.54	['PS(14:0/20:3(8Z,11Z,14Z))', 'PS(14:1(9Z)/20:2(11Z,14Z))', 'PS(16:0/18:3(6Z,9Z,12Z))', 'PS(16:0/18:3(9Z,12Z,15Z))', 'PS(16:1(9Z)/18:2(9Z,12Z))', 'PS(17:1(9Z)/17:2(9Z,12Z))', 'PS(17:2(9Z,12Z)/17:1(9Z))', 'PS(18:2(9Z,12Z)/16:1(9Z))', 'PS(18:3(6Z,9Z,12Z)/16:0)', 'PS(18:3(9Z,12Z,15Z)/16:0)', 'PS(20:2(11Z,14Z)/14:1(9Z))', 'PS(20:3(8Z,11Z,14Z)/14:0)']
756.556	27349	1.08619	0.720442	C42H80NO8P	[M-H]-	756.555	1.45	['PC(12:0/22:2(13Z,16Z))', 'PC(14:0/20:2(11Z,14Z))', 'PC(14:1(9Z)/20:1(11Z))', 'PC(15:1(9Z)/19:1(9Z))', 'PC(16:0/18:2(10E,12Z))', 'PC(16:0/18:2(11Z,13Z))', 'PC(16:0/18:2(2E,4E))', 'PC(16:0/18:2(2Z,4Z))', 'PC(16:0/18:2(6Z,9Z))', 'PC(16:0/18:2(9E,11E))', 'PC(16:0/18:2(9E,11Z))', 'PC(16:0/18:2(9E,12E))', 'PC(16:0/18:2(9Z,12Z))', 'PC(16:1(2Z)/18:1(9Z))', 'PC(16:1(9Z)/18:1(11Z))', 'PC(16:1(9Z)/18:1(9Z…
756.592	10089.6	1.08842	0.887621	C43H84NO7P	[M-H]-	756.591	1.22	['PC(O-18:0/17:2(9Z,12Z))', 'PC(P-16:0/19:1(9Z))', 'PC(P-18:0/17:1(9Z))', 'PC(P-20:0/15:1(9Z))', 'PE(O-16:0/22:2(13Z,16Z))', 'PE(O-18:0/20:2(11Z,14Z))', 'PE(O-20:0/18:2(9Z,12Z))', 'PE(P-16:0/22:1(11Z))', 'PE(P-18:0/20:1(11Z))', 'PE(P-20:0/18:1(9Z))']
757.559	13000.5	1.06701	0.720442	0
757.623	13020.7	1.1383	0.720442	C43H87N2O6P	[M-H]-	757.623	0.67	['SM(d16:1/22:0)', 'SM(d18:1/20:0)']
758.477	66925.2	1.06675	0.801449	C43H70NO8P	[M-H]-	758.477	0.78	['PE(18:3(6Z,9Z,12Z)/20:5(5Z,8Z,11Z,14Z,17Z))', 'PE(18:3(9Z,12Z,15Z)/20:5(5Z,8Z,11Z,14Z,17Z))', 'PE(18:4(6Z,9Z,12Z,15Z)/20:4(5Z,8Z,11Z,14Z))', 'PE(20:4(5Z,8Z,11Z,14Z)/18:4(6Z,9Z,12Z,15Z))', 'PE(20:5(5Z,8Z,11Z,14Z,17Z)/18:3(6Z,9Z,12Z))', 'PE(20:5(5Z,8Z,11Z,14Z,17Z)/18:3(9Z,12Z,15Z))']
758.572	10255.8	1.03787	0.854356	C42H82NO8P	[M-H]-	758.571	1.46	['PC(12:0/22:1(11Z))', 'PC(14:0/20:1(11Z))', 'PC(14:1(9Z)/20:0)', 'PC(15:0/19:1(9Z))', 'PC(15:1(9Z)/19:0)', 'PC(16:0/18:1(11E))', 'PC(16:0/18:1(11Z))', 'PC(16:0/18:1(6E))', 'PC(16:0/18:1(6Z))', 'PC(16:0/18:1(9E))', 'PC(16:0/18:1(9Z))', 'PC(16:1(9Z)/18:0)', 'PC(17:0/17:1(9Z))', 'PC(17:1(9Z)/17:0)', 'PC(18:0/16:1(9Z))', 'PC(18:1(9Z)/16:0)', 'PC(19:0/15:1(9Z))', 'PC(19:1(9Z)/15:0)', 'PC(20:0/14:1(9Z…
758.608	6770.48	1.04911	0.855413	C43H86NO7P	[M-H]-	758.607	1.17	['PC(O-16:0/19:1(9Z))', 'PC(O-17:0/18:1(9Z))', 'PC(O-18:0/17:1(9Z))', 'PC(O-20:0/15:1(9Z))', 'PC(P-16:0/19:0)', 'PC(P-18:0/17:0)', 'PC(P-20:0/15:0)', 'PE(O-16:0/22:1(11Z))', 'PE(O-18:0/20:1(11Z))', 'PE(O-20:0/18:1(9Z))', 'PE(P-16:0/22:0)', 'PE(P-18:0/20:0)', 'PE(P-20:0/18:0)']
759.481	31545.2	1.09443	0.801449	0
760.493	93614.6	1.07386	0.801449	C43H72NO8P	[M-H]-	760.492	1	['PE(16:1(9Z)/22:6(4Z,7Z,10Z,13Z,16Z,19Z))', 'PE(18:2(9Z,12Z)/20:5(5Z,8Z,11Z,14Z,17Z))', 'PE(18:3(6Z,9Z,12Z)/20:4(5Z,8Z,11Z,14Z))', 'PE(18:3(9Z,12Z,15Z)/20:4(5Z,8Z,11Z,14Z))', 'PE(18:4(6Z,9Z,12Z,15Z)/20:3(8Z,11Z,14Z))', 'PE(20:3(8Z,11Z,14Z)/18:4(6Z,9Z,12Z,15Z))', 'PE(20:4(5Z,8Z,11Z,14Z)/18:3(6Z,9Z,12Z))', 'PE(20:4(5Z,8Z,11Z,14Z)/18:3(9Z,12Z,15Z))', 'PE(20:5(5Z,8Z,11Z,14Z,17Z)/18:2(9Z,12Z))', 'PE(…
761.496	44994.2	1.0851	0.791258	0
761.582	79331	1.01124	0.950334	C39H79N2O6P	[M+Hac-H]-	761.581	0.54	['SM(d16:1/18:0)', 'SM(d17:1/17:0)', 'SM(d18:1/16:0)']
762.486	11784.2	1.09188	0.759791	0
762.508	733948	1.07035	0.509688	C43H74NO8P	[M-H]-	762.508	0.42	['PC(13:0/22:6(4Z,7Z,10Z,13Z,16Z,19Z))', 'PC(15:1(9Z)/20:5(5Z,8Z,11Z,14Z,17Z))', 'PC(17:2(9Z,12Z)/18:4(6Z,9Z,12Z,15Z))', 'PC(18:4(6Z,9Z,12Z,15Z)/17:2(9Z,12Z))', 'PC(20:5(5Z,8Z,11Z,14Z,17Z)/15:1(9Z))', 'PC(22:6(4Z,7Z,10Z,13Z,16Z,19Z)/13:0)', 'PE(16:0/22:6(4Z,7Z,10Z,13Z,16Z,19Z))', 'PE(18:1(9Z)/20:5(5Z,8Z,11Z,14Z,17Z))', 'PE(18:2(9Z,12Z)/20:4(5Z,8Z,11Z,14Z))', 'PE(18:3(6Z,9Z,12Z)/20:3(8Z,11Z,14Z))'…
762.585	34480.4	1.01663	0.932248	0
763.489	3774.74	1.18243	0.720442	0
763.512	339335	1.06773	0.500441	C38H73O9P	[M+Hac-H]-	763.513	-1.5	['PG(P-16:0/16:1(9Z))', 'PG(P-18:0/14:1(9Z))']
764.489	34098	1.1529	0.78583	0
764.524	651061	1.09574	0.209594	C43H76NO8P	[M-H]-	764.524	0.81	['PC(15:0/20:5(5Z,8Z,11Z,14Z,17Z))', 'PC(15:1(9Z)/20:4(5Z,8Z,11Z,14Z))', 'PC(17:1(9Z)/18:4(6Z,9Z,12Z,15Z))', 'PC(17:2(9Z,12Z)/18:3(6Z,9Z,12Z))', 'PC(17:2(9Z,12Z)/18:3(9Z,12Z,15Z))', 'PC(18:3(6Z,9Z,12Z)/17:2(9Z,12Z))', 'PC(18:3(9Z,12Z,15Z)/17:2(9Z,12Z))', 'PC(18:4(6Z,9Z,12Z,15Z)/17:1(9Z))', 'PC(20:4(5Z,8Z,11Z,14Z)/15:1(9Z))', 'PC(20:5(5Z,8Z,11Z,14Z,17Z)/15:0)', 'PE(16:1(9Z)/22:4(7Z,10Z,13Z,16Z))',…
765.527	311314	1.10003	0.165922	C38H75O9P	[M+Hac-H]-	765.529	-1.63	['PG(O-16:0/16:1(9Z))', 'PG(O-18:0/14:1(9Z))', 'PG(P-16:0/16:0)', 'PG(P-18:0/14:0)', 'PG(P-20:0/12:0)']
767.488	10236.9	1.10925	0.801449	C47H70O7	[M+Na-2H]-	767.487	1.64	['1-Hydroxy-4-keto-gamma-carotene glucoside/ 1-OH-4-Keto-gamma-carotene glucoside/ (Carotenoid K-G)']
767.488	10236.9	1.10925	0.801449	C40H69O8P	[M+Hac-H]-	767.487	1.59	['PA(15:1(9Z)/22:4(7Z,10Z,13Z,16Z))', 'PA(17:0/20:5(5Z,8Z,11Z,14Z,17Z))', 'PA(17:1(9Z)/20:4(5Z,8Z,11Z,14Z))', 'PA(17:2(9Z,12Z)/20:3(8Z,11Z,14Z))', 'PA(18:4(6Z,9Z,12Z,15Z)/19:1(9Z))', 'PA(19:1(9Z)/18:4(6Z,9Z,12Z,15Z))', 'PA(20:3(8Z,11Z,14Z)/17:2(9Z,12Z))', 'PA(20:4(5Z,8Z,11Z,14Z)/17:1(9Z))', 'PA(20:5(5Z,8Z,11Z,14Z,17Z)/17:0)', 'PA(22:4(7Z,10Z,13Z,16Z)/15:1(9Z))']
767.488	10236.9	1.10925	0.801449	C42H73O10P	[M-H]-	767.487	1.59	['PG(14:1(9Z)/22:4(7Z,10Z,13Z,16Z))', 'PG(16:0/20:5(5Z,8Z,11Z,14Z,17Z))', 'PG(16:1(9Z)/20:4(5Z,8Z,11Z,14Z))', 'PG(18:1(9Z)/18:4(6Z,9Z,12Z,15Z))', 'PG(18:2(9Z,12Z)/18:3(6Z,9Z,12Z))', 'PG(18:2(9Z,12Z)/18:3(9Z,12Z,15Z))', 'PG(18:3(6Z,9Z,12Z)/18:2(9Z,12Z))', 'PG(18:3(9Z,12Z,15Z)/18:2(9Z,12Z))', 'PG(18:4(6Z,9Z,12Z,15Z)/18:1(9Z))', 'PG(20:4(5Z,8Z,11Z,14Z)/16:1(9Z))', 'PG(20:5(5Z,8Z,11Z,14Z,17Z)/16:0)',…
768.521	13684	1.08489	0.852492	0
768.541	22588.6	1.05066	0.801449	0
768.556	347037	1.03962	0.730251	C43H80NO8P	[M-H]-	768.555	1.16	['PC(15:0/20:3(8Z,11Z,14Z))', 'PC(15:1(9Z)/20:2(11Z,14Z))', 'PC(17:0/18:3(6Z,9Z,12Z))', 'PC(17:0/18:3(9Z,12Z,15Z))', 'PC(17:1(9Z)/18:2(9Z,12Z))', 'PC(17:2(9Z,12Z)/18:1(9Z))', 'PC(18:1(9Z)/17:2(9Z,12Z))', 'PC(18:2(9Z,12Z)/17:1(9Z))', 'PC(18:3(6Z,9Z,12Z)/17:0)', 'PC(18:3(9Z,12Z,15Z)/17:0)', 'PC(20:2(11Z,14Z)/15:1(9Z))', 'PC(20:3(8Z,11Z,14Z)/15:0)', 'PE(16:1(9Z)/22:2(13Z,16Z))', 'PE(18:0/20:3(8Z,11Z…
769.504	11083.7	0.946055	0.801449	C40H71O8P	[M+Hac-H]-	769.503	1.44	['PA(15:0/22:4(7Z,10Z,13Z,16Z))', 'PA(17:0/20:4(5Z,8Z,11Z,14Z))', 'PA(17:1(9Z)/20:3(8Z,11Z,14Z))', 'PA(17:2(9Z,12Z)/20:2(11Z,14Z))', 'PA(18:3(6Z,9Z,12Z)/19:1(9Z))', 'PA(18:3(9Z,12Z,15Z)/19:1(9Z))', 'PA(18:4(6Z,9Z,12Z,15Z)/19:0)', 'PA(19:0/18:4(6Z,9Z,12Z,15Z))', 'PA(19:1(9Z)/18:3(6Z,9Z,12Z))', 'PA(19:1(9Z)/18:3(9Z,12Z,15Z))', 'PA(20:2(11Z,14Z)/17:2(9Z,12Z))', 'PA(20:3(8Z,11Z,14Z)/17:1(9Z))', 'PA(2…
769.504	11083.7	0.946055	0.801449	C42H75O10P	[M-H]-	769.503	1.44	['PG(14:0/22:4(7Z,10Z,13Z,16Z))', 'PG(16:0/20:4(5Z,8Z,11Z,14Z))', 'PG(16:1(9Z)/20:3(8Z,11Z,14Z))', 'PG(18:0/18:4(6Z,9Z,12Z,15Z))', 'PG(18:1(9Z)/18:3(6Z,9Z,12Z))', 'PG(18:1(9Z)/18:3(9Z,12Z,15Z))', 'PG(18:2(9Z,12Z)/18:2(9Z,12Z))', 'PG(18:3(6Z,9Z,12Z)/18:1(9Z))', 'PG(18:3(9Z,12Z,15Z)/18:1(9Z))', 'PG(18:4(6Z,9Z,12Z,15Z)/18:0)', 'PG(20:3(8Z,11Z,14Z)/16:1(9Z))', 'PG(20:4(5Z,8Z,11Z,14Z)/16:0)', 'PG(22:4…
769.559	171200	1.02237	0.791258	0
769.623	26173.3	1.02633	0.720442	C44H87N2O6P	[M-H]-	769.623	0.75	['SM(d18:2/21:0)']
770.536	10538.3	1.22098	0.720442	0
770.572	88934.1	1.06632	0.720442	C44H81NO7	[M+Cl]-	770.571	1.9	['DGTS(16:0/18:2(9Z,12Z))']
770.627	12418.3	1.09734	0.720442	0
771.575	45839.2	1.05798	0.720442	0
771.639	40165.6	1.05598	0.720442	C44H89N2O6P	[M-H]-	771.639	0.96	['SM(d16:1/23:0)', 'SM(d17:1/22:0)', 'SM(d18:1/21:0)', 'SM(d19:1/20:0)', 'SM(d20:1/19:0)']
772.588	13285.1	0.991104	0.920486	0
772.642	19358.2	1.07815	0.791258	0
775.597	10575.2	0.946604	0.999284	C40H81N2O6P	[M+Hac-H]-	775.597	0.04	['SM(d18:1/17:0)', 'SM(d19:1/16:0)']
785.517	29147.2	0.928616	0.76838	0
785.654	7801.03	1.16883	0.818844	C45H91N2O6P	[M-H]-	785.654	-0.04	['SM(d16:1/24:0)', 'SM(d18:1/22:0)']
786.51	30008.9	1.3929	0.720442	0
787.513	14490.5	1.16963	0.791258	C40H73O9P	[M+Hac-H]-	787.513	-0.67	['NA', 'PG(O-16:0/18:4(6Z,9Z,12Z,15Z))', 'PG(P-16:0/18:3(6Z,9Z,12Z))', 'PG(P-16:0/18:3(9Z,12Z,15Z))']
787.532	47577.7	0.937498	0.791258	0
788.525	29774	1.26682	0.536784	C43H72NO6P	[M+Hac-H]-	788.524	1.96	['NA']
788.525	29774	1.26682	0.536784	C45H76NO8P	[M-H]-	788.524	1.96	['PC(15:1(9Z)/22:6(4Z,7Z,10Z,13Z,16Z,19Z))', 'PC(17:2(9Z,12Z)/20:5(5Z,8Z,11Z,14Z,17Z))', 'PC(20:5(5Z,8Z,11Z,14Z,17Z)/17:2(9Z,12Z))', 'PC(22:6(4Z,7Z,10Z,13Z,16Z,19Z)/15:1(9Z))', 'PE(18:1(9Z)/22:6(4Z,7Z,10Z,13Z,16Z,19Z))', 'PE(18:3(6Z,9Z,12Z)/22:4(7Z,10Z,13Z,16Z))', 'PE(18:3(9Z,12Z,15Z)/22:4(7Z,10Z,13Z,16Z))', 'PE(20:2(11Z,14Z)/20:5(5Z,8Z,11Z,14Z,17Z))', 'PE(20:3(8Z,11Z,14Z)/20:4(5Z,8Z,11Z,14Z))', …
788.545	81750.8	0.958224	0.801449	C44H81NO8	[M+K-2H]-	788.545	-0.01	['GalCer(d18:2/20:1)', 'GlcCer(d18:2/20:1)']
788.545	81750.8	0.958224	0.801449	C40H76NO8P	[M+Hac-H]-	788.545	0.14	['PC(12:0/20:2(11Z,14Z))', 'PC(14:0/18:2(11Z,14Z))', 'PC(14:0/18:2(9Z,12Z))', 'PC(14:1(9Z)/18:1(9Z))', 'PC(15:0/17:2(9Z,12Z))', 'PC(15:1(9Z)/17:1(9Z))', 'PC(16:1(9E)/16:1(9E))', 'PC(16:1(9Z)/16:1(9Z))', 'PC(17:1(9Z)/15:1(9Z))', 'PC(17:2(9Z,12Z)/15:0)', 'PC(18:1(9Z)/14:1(9Z))', 'PC(18:2(9Z,12Z)/14:0)', 'PC(20:2(11Z,14Z)/12:0)', 'PE(13:0/22:2(13Z,16Z))', 'PE(15:0/20:2(11Z,14Z))', 'PE(15:1(9Z)/20:1(…
788.545	81750.8	0.958224	0.801449	C42H80NO10P	[M-H]-	788.545	0.14	['PS(14:0/22:1(11Z))', 'PS(14:1(9Z)/22:0)', 'PS(15:1(9Z)/21:0)', 'PS(16:0/20:1(11Z))', 'PS(16:1(9Z)/20:0)', 'PS(17:0/19:1(9Z))', 'PS(17:1(9Z)/19:0)', 'PS(18:0/18:1(9Z))', 'PS(18:1(9Z)/18:0)', 'PS(19:0/17:1(9Z))', 'PS(19:1(9Z)/17:0)', 'PS(20:0/16:1(9Z))', 'PS(20:1(11Z)/16:0)', 'PS(21:0/15:1(9Z))', 'PS(22:0/14:1(9Z))', 'PS(22:1(11Z)/14:0)']
789.528	16328.9	1.05757	0.801449	C43H78O10	[M+Cl]-	789.529	-0.99	['MGDG(16:0/18:2(9Z,12Z))']
789.528	16328.9	1.05757	0.801449	C40H75O9P	[M+Hac-H]-	789.529	-0.77	['PG(O-16:0/18:3(6Z,9Z,12Z))', 'PG(O-16:0/18:3(9Z,12Z,15Z))', 'PG(P-16:0/18:2(9Z,12Z))']
789.548	38081.7	0.957184	0.81818	0
789.613	56741	0.969268	0.953489	C41H83N2O6P	[M+Hac-H]-	789.613	0.15	['SM(d16:1/20:0)', 'SM(d18:0/18:1(9Z))', 'SM(d18:1/18:0)']
790.517	24402	0.955187	0.801449	C42H78NO8P	[M+Cl]-	790.516	1.01	['PC(14:0/20:3(8Z,11Z,14Z))', 'PC(14:1(9Z)/20:2(11Z,14Z))', 'PC(16:0/18:3(6Z,9Z,12Z))', 'PC(16:0/18:3(9Z,12Z,15Z))', 'PC(16:1(9Z)/18:2(9Z,12Z))', 'PC(17:1(9Z)/17:2(9Z,12Z))', 'PC(17:2(9Z,12Z)/17:1(9Z))', 'PC(18:2(9Z,12Z)/16:1(9Z))', 'PC(18:3(6Z,9Z,12Z)/16:0)', 'PC(18:3(9Z,12Z,15Z)/16:0)', 'PC(20:2(11Z,14Z)/14:1(9Z))', 'PC(20:3(8Z,11Z,14Z)/14:0)', 'PE(15:1(9Z)/22:2(13Z,16Z))', 'PE(17:0/20:3(8Z,11Z…
790.517	24402	0.955187	0.801449	C43H80NO7P	[M+K-2H]-	790.516	1.09	['PC(O-15:0/20:4(5Z,8Z,11Z,14Z))', 'PE(O-16:0/22:4(7Z,10Z,13Z,16Z))', 'PE(O-18:0/20:4(5Z,8Z,11Z,14Z))', 'PE(O-20:0/18:4(6Z,9Z,12Z,15Z))', 'PE(P-18:0/20:3(8Z,11Z,14Z))', 'PE(P-20:0/18:3(6Z,9Z,12Z))', 'PE(P-20:0/18:3(9Z,12Z,15Z))']
790.541	48441.2	1.12324	0.209594	0
790.56	261672	0.982687	0.954819	C44H83NO8	[M+K-2H]-	790.56	-0.21	['GalCer(d18:2/20:0)', 'GlcCer(d18:2/20:0)']
790.56	261672	0.982687	0.954819	C40H78NO8P	[M+Hac-H]-	790.56	-0.06	['PC(12:0/20:1(11Z))', 'PC(13:0/19:1(9Z))', 'PC(14:0/18:1(11Z))', 'PC(14:0/18:1(9Z))', 'PC(14:1(9Z)/18:0)', 'PC(15:0/17:1(9Z))', 'PC(15:1(9Z)/17:0)', 'PC(16:0/16:1(9Z))', 'PC(16:1(9Z)/16:0)', 'PC(17:0/15:1(9Z))', 'PC(17:1(9Z)/15:0)', 'PC(18:0/14:1(9Z))', 'PC(18:1(9Z)/14:0)', 'PC(19:1(9Z)/13:0)', 'PC(20:1(11Z)/12:0)', 'PE(13:0/22:1(11Z))', 'PE(14:1(9Z)/21:0)', 'PE(15:0/20:1(11Z))', 'PE(15:1(9Z)/20…
790.56	261672	0.982687	0.954819	C42H82NO10P	[M-H]-	790.56	-0.06	['PS(14:0/22:0)', 'PS(15:0/21:0)', 'PS(16:0/20:0)', 'PS(17:0/19:0)', 'PS(18:0/18:0)', 'PS(19:0/17:0)', 'PS(20:0/16:0)', 'PS(21:0/15:0)', 'PS(22:0/14:0)']
790.616	26523.1	0.991835	0.951106	0
791.519	16514.6	0.82868	0.912352	0
791.544	29108.7	1.09442	0.720442	C43H80O10	[M+Cl]-	791.545	-0.79	['MGDG(16:0/18:1(9Z))']
791.544	29108.7	1.09442	0.720442	C40H77O9P	[M+Hac-H]-	791.544	-0.56	['PG(O-16:0/18:2(9Z,12Z))', 'PG(P-16:0/18:1(9Z))', 'PG(P-18:0/16:1(9Z))', 'PG(P-20:0/14:1(9Z))']
791.563	118131	0.968549	0.873999	0
792.435	5036.99	0.66011	0.912352	0
792.48	15891.1	0.979148	0.791258	C41H74NO10P	[M+Na-2H]-	792.48	0.02	['PS(15:0/20:3(8Z,11Z,14Z))', 'PS(15:1(9Z)/20:2(11Z,14Z))', 'PS(17:0/18:3(6Z,9Z,12Z))', 'PS(17:0/18:3(9Z,12Z,15Z))', 'PS(17:1(9Z)/18:2(9Z,12Z))', 'PS(17:2(9Z,12Z)/18:1(9Z))', 'PS(18:1(9Z)/17:2(9Z,12Z))', 'PS(18:2(9Z,12Z)/17:1(9Z))', 'PS(18:3(6Z,9Z,12Z)/17:0)', 'PS(18:3(9Z,12Z,15Z)/17:0)', 'PS(20:2(11Z,14Z)/15:1(9Z))', 'PS(20:3(8Z,11Z,14Z)/15:0)']
792.577	71152	1.01356	0.996627	C40H80NO8P	[M+Hac-H]-	792.576	0.78	['Colfosceril palmitate (USAN/INN)', 'PC(10:0/22:0)', 'PC(11:0/21:0)', 'PC(12:0/20:0)', 'PC(13:0/19:0)', 'PC(14:0/18:0)', 'PC(15:0/17:0)', 'PC(17:0/15:0)', 'PC(18:0/14:0)', 'PC(19:0/13:0)', 'PC(20:0/12:0)', 'PC(21:0/11:0)', 'PC(22:0/10:0)', 'PC(9:0/23:0)', 'PE(13:0/22:0)', 'PE(14:0/21:0)', 'PE(15:0/20:0)', 'PE(16:0/19:0)', 'PE(17:0/18:0)', 'PE(18:0(10(R)Me)/16:0)', 'PE(18:0/17:0)', 'PE(19:0/16:0)…
792.577	71152	1.01356	0.996627	C44H85NO8	[M+K-2H]-	792.576	0.64	['GalCer(d16:1/22:0)', 'GalCer(d18:1/20:0)', 'GlcCer(d16:1/22:0)', 'GlcCer(d18:1/20:0)']
792.745	5276.26	0.468376	0.759791	0
793.559	20163.2	1.12707	0.252054	C40H79O9P	[M+Hac-H]-	793.56	-1.42	['PG(O-16:0/18:1(9Z))', 'PG(O-18:0/16:1(9Z))', 'PG(O-20:0/14:1(9Z))', 'PG(P-16:0/18:0)', 'PG(P-18:0/16:0)', 'PG(P-20:0/14:0)']
793.58	36547.6	1.00411	0.985501	C43H85N2O6P	[M+(37Cl)]-	793.581	-1.57	['SM(d16:1/22:1)', 'SM(d18:1/20:1)', 'SM(d18:2/20:0)']
793.638	31010.3	0.93819	0.951168	0
794.496	68519.6	0.945925	0.791258	C41H76NO10P	[M+Na-2H]-	794.495	0.26	['PS(13:0/22:2(13Z,16Z))', 'PS(15:0/20:2(11Z,14Z))', 'PS(15:1(9Z)/20:1(11Z))', 'PS(16:1(9Z)/19:1(9Z))', 'PS(17:0/18:2(9Z,12Z))', 'PS(17:1(9Z)/18:1(9Z))', 'PS(17:2(9Z,12Z)/18:0)', 'PS(18:0/17:2(9Z,12Z))', 'PS(18:1(9Z)/17:1(9Z))', 'PS(18:2(9Z,12Z)/17:0)', 'PS(19:1(9Z)/16:1(9Z))', 'PS(20:1(11Z)/15:1(9Z))', 'PS(20:2(11Z,14Z)/15:0)', 'PS(22:2(13Z,16Z)/13:0)']
794.571	27825.7	1.06542	0.793308	C45H82NO8P	[M-H]-	794.571	0.52	['PC(15:0/22:4(7Z,10Z,13Z,16Z))', 'PC(17:0/20:4(5Z,8Z,11Z,14Z))', 'PC(17:1(9Z)/20:3(8Z,11Z,14Z))', 'PC(17:2(9Z,12Z)/20:2(11Z,14Z))', 'PC(18:3(6Z,9Z,12Z)/19:1(9Z))', 'PC(18:3(9Z,12Z,15Z)/19:1(9Z))', 'PC(18:4(6Z,9Z,12Z,15Z)/19:0)', 'PC(19:0/18:4(6Z,9Z,12Z,15Z))', 'PC(19:1(9Z)/18:3(6Z,9Z,12Z))', 'PC(19:1(9Z)/18:3(9Z,12Z,15Z))', 'PC(20:2(11Z,14Z)/17:2(9Z,12Z))', 'PC(20:3(8Z,11Z,14Z)/17:1(9Z))', 'PC(2…
794.642	16395.5	0.963842	0.983488	0
795.499	29812.1	0.972291	0.801449	0
795.573	13890.8	1.10263	0.720442	0
795.655	5013.17	0.833478	0.887621	0
796.467	13371.1	0.740051	0.829772	0
796.55	20907.9	1.1786	0.791258	C44H80NO9P	[M-H]-	796.55	0.86	['PC(16:0/20:4(5Z,8Z,10E,14Z)(12OH[S]))', 'PC(16:0/20:4(6E,8Z,11Z,14Z)(5OH[S]))', 'PS(O-16:0/22:4(7Z,10Z,13Z,16Z))', 'PS(O-18:0/20:4(5Z,8Z,11Z,14Z))', 'PS(O-20:0/18:4(6Z,9Z,12Z,15Z))', 'PS(P-18:0/20:3(8Z,11Z,14Z))', 'PS(P-20:0/18:3(6Z,9Z,12Z))', 'PS(P-20:0/18:3(9Z,12Z,15Z))']
796.55	20907.9	1.1786	0.791258	C42H76NO7P	[M+Hac-H]-	796.55	0.86	['PC(P-16:0/18:4(6Z,9Z,12Z,15Z))']
796.586	39807.6	1.0327	0.76838	C45H84NO8P	[M-H]-	796.586	-0.04	['PC(15:1(9Z)/22:2(13Z,16Z))', 'PC(17:0/20:3(8Z,11Z,14Z))', 'PC(17:1(9Z)/20:2(11Z,14Z))', 'PC(17:2(9Z,12Z)/20:1(11Z))', 'PC(18:2(9Z,12Z)/19:1(9Z))', 'PC(18:3(6Z,9Z,12Z)/19:0)', 'PC(18:3(9Z,12Z,15Z)/19:0)', 'PC(19:0/18:3(6Z,9Z,12Z))', 'PC(19:0/18:3(9Z,12Z,15Z))', 'PC(19:1(9Z)/18:2(9Z,12Z))', 'PC(20:1(11Z)/17:2(9Z,12Z))', 'PC(20:2(11Z,14Z)/17:1(9Z))', 'PC(20:3(8Z,11Z,14Z)/17:0)', 'PC(22:2(13Z,16Z)/…
797.59	19522.9	1.03288	0.791258	0
797.67	20891.9	0.948501	0.976492	0
798.529	62525.9	1.03418	0.811243	C41H74NO8P	[M+Hac-H]-	798.529	-0.4	['PC(13:0/20:4(5Z,8Z,11Z,14Z))', 'PC(15:0/18:4(6Z,9Z,12Z,15Z))', 'PC(15:1(9Z)/18:3(6Z,9Z,12Z))', 'PC(15:1(9Z)/18:3(9Z,12Z,15Z))', 'PC(18:3(6Z,9Z,12Z)/15:1(9Z))', 'PC(18:3(9Z,12Z,15Z)/15:1(9Z))', 'PC(18:4(6Z,9Z,12Z,15Z)/15:0)', 'PC(20:4(5Z,8Z,11Z,14Z)/13:0)', 'PE(14:0/22:4(7Z,10Z,13Z,16Z))', 'PE(16:0/20:4(5Z,8Z,11Z,14Z))', 'PE(16:1(9Z)/20:3(8Z,11Z,14Z))', 'PE(18:0/18:4(6Z,9Z,12Z,15Z))', 'PE(18:1(9…
798.529	62525.9	1.03418	0.811243	C43H78NO10P	[M-H]-	798.529	-0.4	['PS(15:1(9Z)/22:2(13Z,16Z))', 'PS(17:0/20:3(8Z,11Z,14Z))', 'PS(17:1(9Z)/20:2(11Z,14Z))', 'PS(17:2(9Z,12Z)/20:1(11Z))', 'PS(18:2(9Z,12Z)/19:1(9Z))', 'PS(18:3(6Z,9Z,12Z)/19:0)', 'PS(18:3(9Z,12Z,15Z)/19:0)', 'PS(19:0/18:3(6Z,9Z,12Z))', 'PS(19:0/18:3(9Z,12Z,15Z))', 'PS(19:1(9Z)/18:2(9Z,12Z))', 'PS(20:1(11Z)/17:2(9Z,12Z))', 'PS(20:2(11Z,14Z)/17:1(9Z))', 'PS(20:3(8Z,11Z,14Z)/17:0)', 'PS(22:2(13Z,16Z)/…
798.603	8006.78	1.03766	0.76838	C45H86NO8P	[M-H]-	798.602	1.75	['PC(15:0/22:2(13Z,16Z))', 'PC(15:1(9Z)/22:1(11Z))', 'PC(17:0/20:2(11Z,14Z))', 'PC(17:1(9Z)/20:1(11Z))', 'PC(17:2(9Z,12Z)/20:0)', 'PC(18:1(9Z)/19:1(9Z))', 'PC(18:2(9Z,12Z)/19:0)', 'PC(19:0/18:2(9Z,12Z))', 'PC(19:1(9Z)/18:1(9Z))', 'PC(20:0/17:2(9Z,12Z))', 'PC(20:1(11Z)/17:1(9Z))', 'PC(20:2(11Z,14Z)/17:0)', 'PC(22:1(11Z)/15:1(9Z))', 'PC(22:2(13Z,16Z)/15:0)', 'PE(18:0/22:2(13Z,16Z))', 'PE(18:1(9Z)/2…
798.673	10621.9	0.851508	0.81818	0
799.533	26062.7	1.0442	0.76838	C45H78O10	[M+Na-2H]-	799.534	-1.96	['MGDG(18:2(9Z,12Z)/18:2(9Z,12Z))']
800.545	279648	1.01959	0.828255	C41H76NO8P	[M+Hac-H]-	800.545	-0.24	['PC(13:0/20:3(8Z,11Z,14Z))', 'PC(15:0/18:3(6Z,9Z,12Z))', 'PC(15:0/18:3(9Z,12Z,15Z))', 'PC(15:1(9Z)/18:2(9Z,12Z))', 'PC(16:1(9Z)/17:2(9Z,12Z))', 'PC(17:2(9Z,12Z)/16:1(9Z))', 'PC(18:2(9Z,12Z)/15:1(9Z))', 'PC(18:3(6Z,9Z,12Z)/15:0)', 'PC(18:3(9Z,12Z,15Z)/15:0)', 'PC(20:3(8Z,11Z,14Z)/13:0)', 'PE(14:1(9Z)/22:2(13Z,16Z))', 'PE(16:0/20:3(8Z,11Z,14Z))', 'PE(16:1(9Z)/20:2(11Z,14Z))', 'PE(17:2(9Z,12Z)/19:1…
800.545	279648	1.01959	0.828255	C43H80NO10P	[M-H]-	800.545	-0.24	['PS(15:0/22:2(13Z,16Z))', 'PS(15:1(9Z)/22:1(11Z))', 'PS(17:0/20:2(11Z,14Z))', 'PS(17:1(9Z)/20:1(11Z))', 'PS(17:2(9Z,12Z)/20:0)', 'PS(18:1(9Z)/19:1(9Z))', 'PS(18:2(9Z,12Z)/19:0)', 'PS(19:0/18:2(9Z,12Z))', 'PS(19:1(9Z)/18:1(9Z))', 'PS(20:0/17:2(9Z,12Z))', 'PS(20:1(11Z)/17:1(9Z))', 'PS(20:2(11Z,14Z)/17:0)', 'PS(22:1(11Z)/15:1(9Z))', 'PS(22:2(13Z,16Z)/15:0)']
800.58	13365.4	1.51881	0.641092	C42H80NO7P	[M+Hac-H]-	800.581	-0.93	['PC(O-16:0/18:3(6Z,9Z,12Z))', 'PC(O-16:0/18:3(9Z,12Z,15Z))', 'PC(P-16:0/18:2(9Z,12Z))', 'PE(P-20:0/17:2(9Z,12Z))']
800.58	13365.4	1.51881	0.641092	C44H84NO9P	[M-H]-	800.581	-0.93	['PS(O-16:0/22:2(13Z,16Z))', 'PS(O-18:0/20:2(11Z,14Z))', 'PS(O-20:0/18:2(9Z,12Z))', 'PS(P-16:0/22:1(11Z))', 'PS(P-18:0/20:1(11Z))', 'PS(P-20:0/18:1(9Z))']
801.549	110451	1.02956	0.801449	0
801.584	4466.51	1.62289	0.720442	0
802.464	29966.5	1.01499	0.791258	C42H72NO10P	[M+Na-2H]-	802.464	0.27	['PS(14:1(9Z)/22:4(7Z,10Z,13Z,16Z))', 'PS(16:0/20:5(5Z,8Z,11Z,14Z,17Z))', 'PS(16:1(9Z)/20:4(5Z,8Z,11Z,14Z))', 'PS(18:1(9Z)/18:4(6Z,9Z,12Z,15Z))', 'PS(18:2(9Z,12Z)/18:3(6Z,9Z,12Z))', 'PS(18:2(9Z,12Z)/18:3(9Z,12Z,15Z))', 'PS(18:3(6Z,9Z,12Z)/18:2(9Z,12Z))', 'PS(18:3(9Z,12Z,15Z)/18:2(9Z,12Z))', 'PS(18:4(6Z,9Z,12Z,15Z)/18:1(9Z))', 'PS(20:4(5Z,8Z,11Z,14Z)/16:1(9Z))', 'PS(20:5(5Z,8Z,11Z,14Z,17Z)/16:0)',…
802.536	3453.42	1.0818	0.948232	C44H80NO8P	[M+Na-2H]-	802.537	-1.17	['PC(14:0/22:4(7Z,10Z,13Z,16Z))', 'PC(16:0/20:4(5E,8E,11E,14E))', 'PC(16:0/20:4(5Z,8Z,11Z,14Z))', 'PC(16:1(9Z)/20:3(8Z,11Z,14Z))', 'PC(18:0/18:4(6Z,9Z,12Z,15Z))', 'PC(18:0/18:4(9E,11E,13E,15E))', 'PC(18:1(9Z)/18:3(6Z,9Z,12Z))', 'PC(18:1(9Z)/18:3(9Z,12Z,15Z))', 'PC(18:2(2E,4E)/18:2(2E,4E))', 'PC(18:2(2Z,4Z)/18:2(2Z,4Z))', 'PC(18:2(6Z,9Z)/18:2(6Z,9Z))', 'PC(18:2(9Z,11Z)/18:2(9Z,11Z))', 'PC(18:2(9Z,…
802.561	127090	1.02511	0.830956	C41H78NO8P	[M+Hac-H]-	802.56	0.66	['PC(13:0/20:2(11Z,14Z))', 'PC(14:1(9Z)/19:1(9Z))', 'PC(15:0/18:2(9Z,12Z))', 'PC(15:1(9Z)/18:1(9Z))', 'PC(16:0/17:2(9Z,12Z))', 'PC(16:1(9Z)/17:1(9Z))', 'PC(17:1(9Z)/16:1(9Z))', 'PC(17:2(9Z,12Z)/16:0)', 'PC(18:1(9Z)/15:1(9Z))', 'PC(18:2(9Z,12Z)/15:0)', 'PC(19:1(9Z)/14:1(9Z))', 'PC(20:2(11Z,14Z)/13:0)', 'PE(14:0/22:2(13Z,16Z))', 'PE(14:1(9Z)/22:1(11Z))', 'PE(16:0/20:2(11Z,14Z))', 'PE(16:1(9Z)/20:1(…
802.561	127090	1.02511	0.830956	C43H82NO10P	[M-H]-	802.56	0.66	['PS(15:0/22:1(11Z))', 'PS(15:1(9Z)/22:0)', 'PS(16:1(9Z)/21:0)', 'PS(17:0/20:1(11Z))', 'PS(17:1(9Z)/20:0)', 'PS(18:0/19:1(9Z))', 'PS(18:1(9Z)/19:0)', 'PS(19:0/18:1(9Z))', 'PS(19:1(9Z)/18:0)', 'PS(20:0/17:1(9Z))', 'PS(20:1(11Z)/17:0)', 'PS(21:0/16:1(9Z))', 'PS(22:0/15:1(9Z))', 'PS(22:1(11Z)/15:0)', 'PT(18:0/18:1(9Z))']
803.471	28870.9	0.931691	0.373478	C41H73O13P	[M-H]-	803.472	-0.95	['PI(12:0/20:3(8Z,11Z,14Z))', 'PI(14:0/18:3(6Z,9Z,12Z))', 'PI(14:0/18:3(9Z,12Z,15Z))', 'PI(14:1(9Z)/18:2(9Z,12Z))', 'PI(15:1(9Z)/17:2(9Z,12Z))', 'PI(17:2(9Z,12Z)/15:1(9Z))', 'PI(18:2(9Z,12Z)/14:1(9Z))', 'PI(18:3(6Z,9Z,12Z)/14:0)', 'PI(18:3(9Z,12Z,15Z)/14:0)', 'PI(20:3(8Z,11Z,14Z)/12:0)']
803.549	4387.11	1.07479	0.830956	0
803.565	55517	1.04127	0.791258	C45H82O10	[M+Na-2H]-	803.565	-1.01	['MGDG(18:0(9Z)/18:2(9Z,12Z))', 'MGDG(18:1(9Z)/18:1(9Z))']
803.628	30218.3	1.00972	0.924228	C42H85N2O6P	[M+Hac-H]-	803.628	-0.2	['SM(d18:1/19:0)', 'SM(d19:1/18:0)']
804.48	42839.7	0.982377	0.801449	C42H74NO10P	[M+Na-2H]-	804.48	0.12	['PS(14:0/22:4(7Z,10Z,13Z,16Z))', 'PS(16:0/20:4(5Z,8Z,11Z,14Z))', 'PS(16:1(9Z)/20:3(8Z,11Z,14Z))', 'PS(18:0/18:4(6Z,9Z,12Z,15Z))', 'PS(18:1(9Z)/18:3(6Z,9Z,12Z))', 'PS(18:1(9Z)/18:3(9Z,12Z,15Z))', 'PS(18:2(9Z,12Z)/18:2(9Z,12Z))', 'PS(18:3(6Z,9Z,12Z)/18:1(9Z))', 'PS(18:3(9Z,12Z,15Z)/18:1(9Z))', 'PS(18:4(6Z,9Z,12Z,15Z)/18:0)', 'PS(20:3(8Z,11Z,14Z)/16:1(9Z))', 'PS(20:4(5Z,8Z,11Z,14Z)/16:0)', 'PS(22:4…
804.576	151486	0.997025	0.912352	C45H85NO8	[M+K-2H]-	804.576	-0.04	['GalCer(d18:2/21:0)', 'GlcCer(d18:2/21:0)']
804.576	151486	0.997025	0.912352	C41H80NO8P	[M+Hac-H]-	804.576	0.1	['PC(13:0/20:1(11Z))', 'PC(14:0/19:1(9Z))', 'PC(14:1(9Z)/19:0)', 'PC(15:0/18:1(11Z))', 'PC(15:0/18:1(9Z))', 'PC(15:1(9Z)/18:0)', 'PC(16:0/17:1(9Z))', 'PC(16:1(9Z)/17:0)', 'PC(17:0/16:1(9Z))', 'PC(17:1(9Z)/16:0)', 'PC(18:0/15:1(9Z))', 'PC(18:1(9Z)/15:0)', 'PC(19:0/14:1(9Z))', 'PC(19:1(9Z)/14:0)', 'PC(20:1(11Z)/13:0)', 'PE(14:0/22:1(11Z))', 'PE(14:1(9Z)/22:0)', 'PE(15:1(9Z)/21:0)', 'PE(16:0/20:1(11…
804.576	151486	0.997025	0.912352	C43H84NO10P	[M-H]-	804.576	0.1	['PS(15:0/22:0)', 'PS(16:0/21:0)', 'PS(17:0/20:0)', 'PS(18:0/19:0)', 'PS(19:0/18:0)', 'PS(20:0/17:0)', 'PS(21:0/16:0)', 'PS(22:0/15:0)']
804.632	12925.1	1.06946	0.801449	C46H89NO8	[M+Na-2H]-	804.633	-1.76	['GalCer(d18:1/22:0)', 'GlcCer(d18:1/22:0)']
805.563	3594.85	0.972842	0.802357	0
805.58	64286	0.985335	0.830956	0
806.496	78013.4	0.977875	0.791258	C42H76NO10P	[M+Na-2H]-	806.495	0.6	['PS(14:1(9Z)/22:2(13Z,16Z))', 'PS(16:0/20:3(8Z,11Z,14Z))', 'PS(16:1(9Z)/20:2(11Z,14Z))', 'PS(17:2(9Z,12Z)/19:1(9Z))', 'PS(18:0/18:3(6Z,9Z,12Z))', 'PS(18:0/18:3(9Z,12Z,15Z))', 'PS(18:1(9Z)/18:2(9Z,12Z))', 'PS(18:2(9Z,12Z)/18:1(9Z))', 'PS(18:3(6Z,9Z,12Z)/18:0)', 'PS(18:3(9Z,12Z,15Z)/18:0)', 'PS(19:1(9Z)/17:2(9Z,12Z))', 'PS(20:2(11Z,14Z)/16:1(9Z))', 'PS(20:3(8Z,11Z,14Z)/16:0)', 'PS(22:2(13Z,16Z)/14…
806.534	42824.1	1.02972	0.830956	C45H78NO9P	[M-H]-	806.534	-0.54	['PE(18:0/22:6(4Z,7Z,10Z,12E,16Z,19Z)(14OH))']
806.534	42824.1	1.02972	0.830956	C43H74NO7P	[M+Hac-H]-	806.534	-0.54	['PE(O-16:1(1Z)/22:6(4Z,7Z,10Z,13Z,16Z,19Z))']
806.596	7868.51	0.927298	0.836142	0
808.512	95615.4	0.965604	0.76838	C42H72NO8P	[M+Hac-H]-	808.513	-1.35	['PC(12:0/22:6(4Z,7Z,10Z,13Z,16Z,19Z))', 'PC(14:1(9Z)/20:5(5Z,8Z,11Z,14Z,17Z))', 'PC(20:5(5Z,8Z,11Z,14Z,17Z)/14:1(9Z))', 'PC(22:6(4Z,7Z,10Z,13Z,16Z,19Z)/12:0)', 'PE(15:0/22:6(4Z,7Z,10Z,13Z,16Z,19Z))', 'PE(17:1(9Z)/20:5(5Z,8Z,11Z,14Z,17Z))', 'PE(17:2(9Z,12Z)/20:4(5Z,8Z,11Z,14Z))', 'PE(20:4(5Z,8Z,11Z,14Z)/17:2(9Z,12Z))', 'PE(20:5(5Z,8Z,11Z,14Z,17Z)/17:1(9Z))', 'PE(22:6(4Z,7Z,10Z,13Z,16Z,19Z)/15:0)']
808.512	95615.4	0.965604	0.76838	C42H78NO10P	[M+Na-2H]-	808.511	1.63	['PS(14:0/22:2(13Z,16Z))', 'PS(14:1(9Z)/22:1(11Z))', 'PS(16:0/20:2(11Z,14Z))', 'PS(16:1(9Z)/20:1(11Z))', 'PS(17:1(9Z)/19:1(9Z))', 'PS(17:2(9Z,12Z)/19:0)', 'PS(18:0/18:2(9Z,12Z))', 'PS(18:1(9Z)/18:1(9Z))', 'PS(18:2(9Z,12Z)/18:0)', 'PS(19:0/17:2(9Z,12Z))', 'PS(19:1(9Z)/17:1(9Z))', 'PS(20:1(11Z)/16:1(9Z))', 'PS(20:2(11Z,14Z)/16:0)', 'PS(22:1(11Z)/14:1(9Z))', 'PS(22:2(13Z,16Z)/14:0)']
808.512	95615.4	0.965604	0.76838	C44H76NO10P	[M-H]-	808.513	-1.35	['PS(16:1(9Z)/22:4(7Z,10Z,13Z,16Z))', 'PS(18:0/20:5(5Z,8Z,11Z,14Z,17Z))', 'PS(18:1(9Z)/20:4(5Z,8Z,11Z,14Z))', 'PS(18:2(9Z,12Z)/20:3(8Z,11Z,14Z))', 'PS(18:3(6Z,9Z,12Z)/20:2(11Z,14Z))', 'PS(18:3(9Z,12Z,15Z)/20:2(11Z,14Z))', 'PS(18:4(6Z,9Z,12Z,15Z)/20:1(11Z))', 'PS(20:1(11Z)/18:4(6Z,9Z,12Z,15Z))', 'PS(20:2(11Z,14Z)/18:3(6Z,9Z,12Z))', 'PS(20:2(11Z,14Z)/18:3(9Z,12Z,15Z))', 'PS(20:3(8Z,11Z,14Z)/18:2(9Z…
808.55	37879	1.03884	0.891991	C46H79NO8	[M+Cl]-	808.55	-0.37	['DGCC(16:0/20:5)']
808.55	37879	1.03884	0.891991	C43H76NO7P	[M+Hac-H]-	808.55	-0.16	['PE(O-16:0/22:6(4Z,7Z,10Z,13Z,16Z,19Z))', 'PE(P-18:0/20:5(5Z,8Z,11Z,14Z,17Z))']
809.516	43761.8	0.962693	0.76838	0
809.554	17853.2	1.06787	0.843346	C40H79O10P	[M+Hac-H]-	809.555	-1.73	['PG(12:0/22:0)', 'PG(13:0/21:0)', 'PG(14:0/20:0)', 'PG(15:0/19:0)', 'PG(16:0/18:0)', 'PG(17:0/17:0)', 'PG(18:0/16:0)', 'PG(19:0/15:0)', 'PG(20:0/14:0)', 'PG(21:0/13:0)', 'PG(22:0/12:0)']
809.554	17853.2	1.06787	0.843346	C42H83O12P	[M-H]-	809.555	-1.73	['PI(O-16:0/17:0)', 'PI(O-18:0/15:0)', 'PI(O-20:0/13:0)']
809.633	33774	0.997499	0.999284	0
810.512	2571.65	0.87389	0.214586	0
810.529	74395.8	0.970867	0.791258	C46H79NO8	[M+K-2H]-	810.529	-0.12	['DGCC(16:0/20:5)']
810.529	74395.8	0.970867	0.791258	C42H74NO8P	[M+Hac-H]-	810.529	0.02	['PC(14:0/20:5(5Z,8Z,11Z,14Z,17Z))', 'PC(14:1(9Z)/20:4(5Z,8Z,11Z,14Z))', 'PC(16:1(9Z)/18:4(6Z,9Z,12Z,15Z))', 'PC(18:4(6Z,9Z,12Z,15Z)/16:1(9Z))', 'PC(20:4(5Z,8Z,11Z,14Z)/14:1(9Z))', 'PC(20:5(5Z,8Z,11Z,14Z,17Z)/14:0)', 'PE(15:1(9Z)/22:4(7Z,10Z,13Z,16Z))', 'PE(17:0/20:5(5Z,8Z,11Z,14Z,17Z))', 'PE(17:1(9Z)/20:4(5Z,8Z,11Z,14Z))', 'PE(17:2(9Z,12Z)/20:3(8Z,11Z,14Z))', 'PE(18:4(6Z,9Z,12Z,15Z)/19:1(9Z))', …
810.529	74395.8	0.970867	0.791258	C44H78NO10P	[M-H]-	810.529	0.02	['PS(16:0/22:4(7Z,10Z,13Z,16Z))', 'PS(18:0/20:4(5Z,8Z,11Z,14Z))', 'PS(18:1(9Z)/20:3(8Z,11Z,14Z))', 'PS(18:2(9Z,12Z)/20:2(11Z,14Z))', 'PS(18:3(6Z,9Z,12Z)/20:1(11Z))', 'PS(18:3(9Z,12Z,15Z)/20:1(11Z))', 'PS(18:4(6Z,9Z,12Z,15Z)/20:0)', 'PS(20:0/18:4(6Z,9Z,12Z,15Z))', 'PS(20:1(11Z)/18:3(6Z,9Z,12Z))', 'PS(20:1(11Z)/18:3(9Z,12Z,15Z))', 'PS(20:2(11Z,14Z)/18:2(9Z,12Z))', 'PS(20:3(8Z,11Z,14Z)/18:1(9Z))', '…
810.565	72763.8	1.0257	0.830956	C43H78NO7P	[M+Hac-H]-	810.565	-0.01	['PE(O-16:0/22:5(4Z,7Z,10Z,13Z,16Z))', 'PE(O-16:0/22:5(7Z,10Z,13Z,16Z,19Z))', 'PE(O-18:0/20:5(5Z,8Z,11Z,14Z,17Z))', 'PE(O-18:1(1Z)/20:4(5Z,8Z,11Z,14Z))', 'PE(P-16:0/22:4(7Z,10Z,13Z,16Z))', 'PE(P-20:0/18:4(6Z,9Z,12Z,15Z))']
810.602	8084.76	1.17169	0.663877	C46H86NO8P	[M-H]-	810.602	-0.37	['PC(16:1(9Z)/22:2(13Z,16Z))', 'PC(18:0/20:3(5Z,11Z,14Z))', 'PC(18:0/20:3(5Z,8Z,11Z))', 'PC(18:0/20:3(5Z,8Z,14Z))', 'PC(18:0/20:3(8Z,11Z,14Z))', 'PC(18:1(9Z)/20:2(11Z,14Z))', 'PC(18:2(9Z,12Z)/20:1(11Z))', 'PC(18:2(9Z,12Z)/20:1(13Z))', 'PC(18:3(6Z,9Z,12Z)/20:0)', 'PC(18:3(9Z,12Z,15Z)/20:0)', 'PC(20:0/18:3(6Z,9Z,12Z))', 'PC(20:0/18:3(9Z,12Z,15Z))', 'PC(20:1(11Z)/18:2(9Z,12Z))', 'PC(20:2(11Z,14Z)/18…
810.637	18827	0.989221	0.999284	C45H92NO7P	[M+Na-2H]-	810.636	1.08	['PC(O-16:0/21:0)', 'PC(O-17:0/20:0)', 'PC(O-18:0/19:0)', 'PC(O-20:0/17:0)', 'PE(O-18:0/22:0)', 'PE(O-20:0/20:0)']
810.637	18827	0.989221	0.999284	C47H90NO7P	[M-H]-	810.638	-1.88	['PE(P-20:0/22:2(13Z,16Z))']
811.532	36857.7	0.980835	0.81818	0
811.569	37030.3	1.04123	0.830956	0
811.651	5895.82	1.112	0.953288	0
812.5	19986.8	0.864744	0.951168	C44H76NO8P	[M+Cl]-	812.5	-0.4	['PC(14:0/22:6(4Z,7Z,10Z,13Z,16Z,19Z))', 'PC(16:1(9Z)/20:5(5Z,8Z,11Z,14Z,17Z))', 'PC(18:2(9Z,12Z)/18:4(6Z,9Z,12Z,15Z))', 'PC(18:3(6Z,9Z,12Z)/18:3(6Z,9Z,12Z))', 'PC(18:3(6Z,9Z,12Z)/18:3(9Z,12Z,15Z))', 'PC(18:3(9E,11E,13E)/18:3(9E,11E,13E))', 'PC(18:3(9Z,11E,13E)/18:3(9Z,11E,13E))', 'PC(18:3(9Z,12Z,15Z)/18:3(6Z,9Z,12Z))', 'PC(18:3(9Z,12Z,15Z)/18:3(9Z,12Z,15Z))', 'PC(18:4(6Z,9Z,12Z,15Z)/18:2(9Z,12Z)…
812.5	19986.8	0.864744	0.951168	C45H78NO7P	[M+K-2H]-	812.5	-0.33	['PE(P-18:0/22:6(4Z,7Z,10Z,13Z,16Z,19Z))']
812.545	212238	1.06875	0.801449	C42H76NO8P	[M+Hac-H]-	812.545	-0.17	['PC(12:0/22:4(7Z,10Z,13Z,16Z))', 'PC(14:0/20:4(5Z,8Z,11Z,14Z))', 'PC(14:1(9Z)/20:3(8Z,11Z,14Z))', 'PC(16:0/18:4(6Z,9Z,12Z,15Z))', 'PC(16:0/18:4(9E,11E,13E,15E))', 'PC(16:0/18:4(9Z,11E,13E,15Z))', 'PC(16:0/18:4(9Z,11Z,13Z,15Z))', 'PC(16:1(9Z)/18:3(6Z,9Z,12Z))', 'PC(16:1(9Z)/18:3(9Z,12Z,15Z))', 'PC(16:2(2E,4E)/18:2(2E,4E))', 'PC(17:2(9Z,12Z)/17:2(9Z,12Z))', 'PC(18:3(6Z,9Z,12Z)/16:1(9Z))', 'PC(18:3…
812.545	212238	1.06875	0.801449	C44H80NO10P	[M-H]-	812.545	-0.17	['PS(16:1(9Z)/22:2(13Z,16Z))', 'PS(18:0/20:3(8Z,11Z,14Z))', 'PS(18:1(9Z)/20:2(11Z,14Z))', 'PS(18:2(9Z,12Z)/20:1(11Z))', 'PS(18:3(6Z,9Z,12Z)/20:0)', 'PS(18:3(9Z,12Z,15Z)/20:0)', 'PS(20:0/18:3(6Z,9Z,12Z))', 'PS(20:0/18:3(9Z,12Z,15Z))', 'PS(20:1(11Z)/18:2(9Z,12Z))', 'PS(20:2(11Z,14Z)/18:1(9Z))', 'PS(20:3(8Z,11Z,14Z)/18:0)', 'PS(22:2(13Z,16Z)/16:1(9Z))']
812.566	4140.67	1.03753	0.798363	0
812.582	10933.5	0.980515	0.863193	C43H80NO7P	[M+Hac-H]-	812.581	1.59	['PC(O-15:0/20:4(5Z,8Z,11Z,14Z))', 'PE(O-16:0/22:4(7Z,10Z,13Z,16Z))', 'PE(O-18:0/20:4(5Z,8Z,11Z,14Z))', 'PE(O-20:0/18:4(6Z,9Z,12Z,15Z))', 'PE(P-18:0/20:3(8Z,11Z,14Z))', 'PE(P-20:0/18:3(6Z,9Z,12Z))', 'PE(P-20:0/18:3(9Z,12Z,15Z))']
813.548	101916	1.06281	0.791258	0
813.585	6129	0.87551	0.749274	0
813.665	23066.8	1.049	0.957953	0
814.499	5344.34	1.15732	0.951168	C44H76NO9P	[M+Na-2H]-	814.5	-1.83	['PS(O-16:0/22:6(4Z,7Z,10Z,13Z,16Z,19Z))', 'PS(P-18:0/20:5(5Z,8Z,11Z,14Z,17Z))']
814.517	22676.2	0.832842	0.945589	C44H78NO8P	[M+Cl]-	814.516	0.76	['PC(14:1(9Z)/22:4(7Z,10Z,13Z,16Z))', 'PC(16:0/20:5(5Z,8Z,11Z,14Z,17Z))', 'PC(16:1(7Z)/20:4(5Z,8Z,11Z,14Z))', 'PC(16:1(9Z)/20:4(5Z,8Z,11Z,14Z))', 'PC(18:1(9Z)/18:4(6Z,9Z,12Z,15Z))', 'PC(18:2(9Z,12Z)/18:3(6Z,9Z,12Z))', 'PC(18:2(9Z,12Z)/18:3(9Z,12Z,15Z))', 'PC(18:3(6Z,9Z,12Z)/18:2(9Z,12Z))', 'PC(18:3(9Z,12Z,15Z)/18:2(9Z,12Z))', 'PC(18:4(6Z,9Z,12Z,15Z)/18:1(9Z))', 'PC(20:4(5Z,8Z,11Z,14Z)/16:1(9Z))',…
814.517	22676.2	0.832842	0.945589	C45H80NO7P	[M+K-2H]-	814.516	0.84	['PE(O-18:0/22:6(4Z,7Z,10Z,13Z,16Z,19Z))', 'PE(P-20:0/20:5(5Z,8Z,11Z,14Z,17Z))']
814.56	1.00787e+06	1.02282	0.96082	C42H78NO8P	[M+Hac-H]-	814.56	-0.64	['PC(14:0/20:3(8Z,11Z,14Z))', 'PC(14:1(9Z)/20:2(11Z,14Z))', 'PC(16:0/18:3(6Z,9Z,12Z))', 'PC(16:0/18:3(9Z,12Z,15Z))', 'PC(16:1(9Z)/18:2(9Z,12Z))', 'PC(17:1(9Z)/17:2(9Z,12Z))', 'PC(17:2(9Z,12Z)/17:1(9Z))', 'PC(18:2(9Z,12Z)/16:1(9Z))', 'PC(18:3(6Z,9Z,12Z)/16:0)', 'PC(18:3(9Z,12Z,15Z)/16:0)', 'PC(20:2(11Z,14Z)/14:1(9Z))', 'PC(20:3(8Z,11Z,14Z)/14:0)', 'PE(15:1(9Z)/22:2(13Z,16Z))', 'PE(17:0/20:3(8Z,11Z…
814.56	1.00787e+06	1.02282	0.96082	C44H82NO10P	[M-H]-	814.56	-0.64	['PS(16:0/22:2(13Z,16Z))', 'PS(16:1(9Z)/22:1(11Z))', 'PS(17:2(9Z,12Z)/21:0)', 'PS(18:0/20:2(11Z,14Z))', 'PS(18:1(9Z)/20:1(11Z))', 'PS(18:2(9Z,12Z)/20:0)', 'PS(19:1(9Z)/19:1(9Z))', 'PS(20:0/18:2(9Z,12Z))', 'PS(20:1(11Z)/18:1(9Z))', 'PS(20:2(11Z,14Z)/18:0)', 'PS(21:0/17:2(9Z,12Z))', 'PS(22:1(11Z)/16:1(9Z))', 'PS(22:2(13Z,16Z)/16:0)']
814.579	8992.54	1.01171	0.991131	0
814.588	2648.86	1.07117	0.801449	0
814.668	12443.1	1.00993	0.999467	0
815.52	13599.2	0.897907	0.953288	C42H83O10P	[M+K-2H]-	815.521	-1.71	['PG(14:0/22:0)', 'PG(15:0/21:0)', 'PG(16:0/20:0)', 'PG(17:0/19:0)', 'PG(18:0/18:0)', 'PG(19:0/17:0)', 'PG(20:0/16:0)', 'PG(21:0/15:0)', 'PG(22:0/14:0)']
815.564	485925	1.02036	0.959525	0
815.628	20407.7	1.07526	0.801449	C43H85N2O6P	[M+Hac-H]-	815.628	-0.37	['SM(d16:1/22:1)', 'SM(d18:1/20:1)', 'SM(d18:2/20:0)']
816.48	89955.5	0.975791	0.801449	C43H74NO10P	[M+Na-2H]-	816.48	-0.03	['PS(15:1(9Z)/22:4(7Z,10Z,13Z,16Z))', 'PS(17:0/20:5(5Z,8Z,11Z,14Z,17Z))', 'PS(17:1(9Z)/20:4(5Z,8Z,11Z,14Z))', 'PS(17:2(9Z,12Z)/20:3(8Z,11Z,14Z))', 'PS(18:4(6Z,9Z,12Z,15Z)/19:1(9Z))', 'PS(19:1(9Z)/18:4(6Z,9Z,12Z,15Z))', 'PS(20:3(8Z,11Z,14Z)/17:2(9Z,12Z))', 'PS(20:4(5Z,8Z,11Z,14Z)/17:1(9Z))', 'PS(20:5(5Z,8Z,11Z,14Z,17Z)/17:0)', 'PS(22:4(7Z,10Z,13Z,16Z)/15:1(9Z))']
816.532	25251.6	0.817739	0.932248	C44H80NO8P	[M+Cl]-	816.532	0.22	['PC(14:0/22:4(7Z,10Z,13Z,16Z))', 'PC(16:0/20:4(5E,8E,11E,14E))', 'PC(16:0/20:4(5Z,8Z,11Z,14Z))', 'PC(16:1(9Z)/20:3(8Z,11Z,14Z))', 'PC(18:0/18:4(6Z,9Z,12Z,15Z))', 'PC(18:0/18:4(9E,11E,13E,15E))', 'PC(18:1(9Z)/18:3(6Z,9Z,12Z))', 'PC(18:1(9Z)/18:3(9Z,12Z,15Z))', 'PC(18:2(2E,4E)/18:2(2E,4E))', 'PC(18:2(2Z,4Z)/18:2(2Z,4Z))', 'PC(18:2(6Z,9Z)/18:2(6Z,9Z))', 'PC(18:2(9Z,11Z)/18:2(9Z,11Z))', 'PC(18:2(9Z,…
816.532	25251.6	0.817739	0.932248	C45H82NO7P	[M+K-2H]-	816.531	0.3	['PE(O-20:0/20:5(5Z,8Z,11Z,14Z,17Z))', 'PE(P-18:0/22:4(7Z,10Z,13Z,16Z))', 'PE(P-20:0/20:4(5Z,8Z,11Z,14Z))']
816.549	5429.39	1.00999	0.817102	C45H82NO7P	[M+(37Cl)]-	816.549	-0.57	['PE(O-20:0/20:5(5Z,8Z,11Z,14Z,17Z))', 'PE(P-18:0/22:4(7Z,10Z,13Z,16Z))', 'PE(P-20:0/20:4(5Z,8Z,11Z,14Z))']
816.559	28038	1.05278	0.830956	0
816.576	416523	1.04534	0.830956	C42H80NO8P	[M+Hac-H]-	816.576	0.22	['PC(12:0/22:2(13Z,16Z))', 'PC(14:0/20:2(11Z,14Z))', 'PC(14:1(9Z)/20:1(11Z))', 'PC(15:1(9Z)/19:1(9Z))', 'PC(16:0/18:2(10E,12Z))', 'PC(16:0/18:2(11Z,13Z))', 'PC(16:0/18:2(2E,4E))', 'PC(16:0/18:2(2Z,4Z))', 'PC(16:0/18:2(6Z,9Z))', 'PC(16:0/18:2(9E,11E))', 'PC(16:0/18:2(9E,11Z))', 'PC(16:0/18:2(9E,12E))', 'PC(16:0/18:2(9Z,12Z))', 'PC(16:1(2Z)/18:1(9Z))', 'PC(16:1(9Z)/18:1(11Z))', 'PC(16:1(9Z)/18:1(9Z…
816.576	416523	1.04534	0.830956	C44H84NO10P	[M-H]-	816.576	0.22	['PS(16:0/22:1(11Z))', 'PS(16:1(9Z)/22:0)', 'PS(17:1(9Z)/21:0)', 'PS(18:0/20:1(11Z))', 'PS(18:1(9Z)/20:0)', 'PS(19:0/19:1(9Z))', 'PS(19:1(9Z)/19:0)', 'PS(20:0/18:1(9Z))', 'PS(20:1(11Z)/18:0)', 'PS(21:0/17:1(9Z))', 'PS(22:0/16:1(9Z))', 'PS(22:1(11Z)/16:0)']
816.595	4954.57	1.08074	0.802357	0
816.63	9120.36	1.07376	0.81818	0
817.483	44092.1	0.959757	0.801449	C40H77O12P	[M+(37Cl)]-	817.482	1.69	['PI(O-16:0/15:1(9Z))', 'PI(P-16:0/15:0)', 'PI(P-18:0/13:0)']
817.535	23827.6	0.947676	0.996627	C45H81O8P	[M+(37Cl)]-	817.533	1.65	['PA(20:0/22:4(7Z,10Z,13Z,16Z))', 'PA(20:2(11Z,14Z)/22:2(13Z,16Z))', 'PA(20:3(8Z,11Z,14Z)/22:1(11Z))', 'PA(20:4(5Z,8Z,11Z,14Z)/22:0)', 'PA(22:0/20:4(5Z,8Z,11Z,14Z))', 'PA(22:1(11Z)/20:3(8Z,11Z,14Z))', 'PA(22:2(13Z,16Z)/20:2(11Z,14Z))', 'PA(22:4(7Z,10Z,13Z,16Z)/20:0)']
817.535	23827.6	0.947676	0.996627	C52H76O5	[M+(37Cl)]-	817.536	-1.24	['Siphonaxanthin ester/ Siphonaxanthin dodecenoate/ (Siphonein)']
817.552	1344.26	1.59186	0.652474	C45H83O8P	[M+Cl]-	817.552	0.43	['PA(20:1(11Z)/22:2(13Z,16Z))', 'PA(20:2(11Z,14Z)/22:1(11Z))', 'PA(20:3(8Z,11Z,14Z)/22:0)', 'PA(22:0/20:3(8Z,11Z,14Z))', 'PA(22:1(11Z)/20:2(11Z,14Z))', 'PA(22:2(13Z,16Z)/20:1(11Z))']
817.561	7219.28	1.03869	0.817102	C45H82O10	[M+Cl]-	817.56	0.99	['MGDG(18:0(9Z)/18:2(9Z,12Z))', 'MGDG(18:1(9Z)/18:1(9Z))']
817.561	7219.28	1.03869	0.817102	C42H79O9P	[M+Hac-H]-	817.56	1.2	['PG(O-16:0/20:3(8Z,11Z,14Z))', 'PG(O-18:0/18:3(6Z,9Z,12Z))', 'PG(O-18:0/18:3(9Z,12Z,15Z))', 'PG(P-16:0/20:2(11Z,14Z))', 'PG(P-18:0/18:2(9Z,12Z))']
817.579	226950	1.02956	0.951106	0
817.644	84605.9	1.04202	0.948232	C43H87N2O6P	[M+Hac-H]-	817.644	-0.35	['SM(d16:1/22:0)', 'SM(d18:1/20:0)']
818.477	2905.97	0.974472	0.959016	0
818.496	108974	0.992889	0.801449	C43H76NO10P	[M+Na-2H]-	818.495	0.8	['PS(15:0/22:4(7Z,10Z,13Z,16Z))', 'PS(17:0/20:4(5Z,8Z,11Z,14Z))', 'PS(17:1(9Z)/20:3(8Z,11Z,14Z))', 'PS(17:2(9Z,12Z)/20:2(11Z,14Z))', 'PS(18:3(6Z,9Z,12Z)/19:1(9Z))', 'PS(18:3(9Z,12Z,15Z)/19:1(9Z))', 'PS(18:4(6Z,9Z,12Z,15Z)/19:0)', 'PS(19:0/18:4(6Z,9Z,12Z,15Z))', 'PS(19:1(9Z)/18:3(6Z,9Z,12Z))', 'PS(19:1(9Z)/18:3(9Z,12Z,15Z))', 'PS(20:2(11Z,14Z)/17:2(9Z,12Z))', 'PS(20:3(8Z,11Z,14Z)/17:1(9Z))', 'PS(2…
818.55	5764.53	1.35296	0.791258	0
818.574	12935.9	0.999126	0.956705	0
818.592	393094	0.984283	0.980936	C46H87NO8	[M+K-2H]-	818.592	0.07	['GalCer(d18:2/22:0)', 'GlcCer(d18:2/22:0)']
818.592	393094	0.984283	0.980936	C42H82NO8P	[M+Hac-H]-	818.592	0.21	['PC(12:0/22:1(11Z))', 'PC(14:0/20:1(11Z))', 'PC(14:1(9Z)/20:0)', 'PC(15:0/19:1(9Z))', 'PC(15:1(9Z)/19:0)', 'PC(16:0/18:1(11E))', 'PC(16:0/18:1(11Z))', 'PC(16:0/18:1(6E))', 'PC(16:0/18:1(6Z))', 'PC(16:0/18:1(9E))', 'PC(16:0/18:1(9Z))', 'PC(16:1(9Z)/18:0)', 'PC(17:0/17:1(9Z))', 'PC(17:1(9Z)/17:0)', 'PC(18:0/16:1(9Z))', 'PC(18:1(9Z)/16:0)', 'PC(19:0/15:1(9Z))', 'PC(19:1(9Z)/15:0)', 'PC(20:0/14:1(9Z…
818.592	393094	0.984283	0.980936	C44H86NO10P	[M-H]-	818.592	0.21	['PS(16:0/22:0)', 'PS(17:0/21:0)', 'PS(18:0/20:0)', 'PS(19:0/19:0)', 'PS(20:0/18:0)', 'PS(21:0/17:0)', 'PS(22:0/16:0)']
818.609	5042.71	0.998206	0.980305	C46H87NO8	[M+(37Cl)]-	818.61	-0.33	['GalCer(d18:2/22:0)', 'GlcCer(d18:2/22:0)']
818.647	41236.6	1.05301	0.903658	0
819.499	54072.7	0.997964	0.811243	0
819.551	11298.6	0.891023	0.976492	0
819.595	205340	1.00353	0.998079	C45H87N2O6P	[M+(37Cl)]-	819.597	-1.73	['SM(d18:2/22:1)']
820.389	8197.2	0.773172	0.828444	0
820.492	3799.4	1.09949	0.801449	0
820.511	185979	0.981113	0.801449	C43H78NO10P	[M+Na-2H]-	820.511	0.01	['PS(15:1(9Z)/22:2(13Z,16Z))', 'PS(17:0/20:3(8Z,11Z,14Z))', 'PS(17:1(9Z)/20:2(11Z,14Z))', 'PS(17:2(9Z,12Z)/20:1(11Z))', 'PS(18:2(9Z,12Z)/19:1(9Z))', 'PS(18:3(6Z,9Z,12Z)/19:0)', 'PS(18:3(9Z,12Z,15Z)/19:0)', 'PS(19:0/18:3(6Z,9Z,12Z))', 'PS(19:0/18:3(9Z,12Z,15Z))', 'PS(19:1(9Z)/18:2(9Z,12Z))', 'PS(20:1(11Z)/17:2(9Z,12Z))', 'PS(20:2(11Z,14Z)/17:1(9Z))', 'PS(20:3(8Z,11Z,14Z)/17:0)', 'PS(22:2(13Z,16Z)/…
820.596	38193.6	1.01039	0.953489	0
820.612	10085.3	0.988977	0.981081	0
820.776	7088.42	0.579164	0.801449	0
821.514	94089.9	0.967573	0.801449	0
821.613	9565.19	0.987973	0.999284	C45H89N2O6P	[M+(37Cl)]-	821.612	0.67	['SM(d16:1/24:1)', 'SM(d18:1/22:1(13Z))', 'SM(d18:2/22:0)']
821.67	42841.6	1.01645	0.977795	0
822.51	7890.53	0.996616	0.951168	0
822.528	240224	1.03029	0.801449	C43H74NO8P	[M+Hac-H]-	822.529	-1.19	['PC(13:0/22:6(4Z,7Z,10Z,13Z,16Z,19Z))', 'PC(15:1(9Z)/20:5(5Z,8Z,11Z,14Z,17Z))', 'PC(17:2(9Z,12Z)/18:4(6Z,9Z,12Z,15Z))', 'PC(18:4(6Z,9Z,12Z,15Z)/17:2(9Z,12Z))', 'PC(20:5(5Z,8Z,11Z,14Z,17Z)/15:1(9Z))', 'PC(22:6(4Z,7Z,10Z,13Z,16Z,19Z)/13:0)', 'PE(16:0/22:6(4Z,7Z,10Z,13Z,16Z,19Z))', 'PE(18:1(9Z)/20:5(5Z,8Z,11Z,14Z,17Z))', 'PE(18:2(9Z,12Z)/20:4(5Z,8Z,11Z,14Z))', 'PE(18:3(6Z,9Z,12Z)/20:3(8Z,11Z,14Z))'…
822.528	240224	1.03029	0.801449	C43H80NO10P	[M+Na-2H]-	822.527	1.73	['PS(15:0/22:2(13Z,16Z))', 'PS(15:1(9Z)/22:1(11Z))', 'PS(17:0/20:2(11Z,14Z))', 'PS(17:1(9Z)/20:1(11Z))', 'PS(17:2(9Z,12Z)/20:0)', 'PS(18:1(9Z)/19:1(9Z))', 'PS(18:2(9Z,12Z)/19:0)', 'PS(19:0/18:2(9Z,12Z))', 'PS(19:1(9Z)/18:1(9Z))', 'PS(20:0/17:2(9Z,12Z))', 'PS(20:1(11Z)/17:1(9Z))', 'PS(20:2(11Z,14Z)/17:0)', 'PS(22:1(11Z)/15:1(9Z))', 'PS(22:2(13Z,16Z)/15:0)']
822.528	240224	1.03029	0.801449	C45H78NO10P	[M-H]-	822.529	-1.19	['PS(17:1(9Z)/22:4(7Z,10Z,13Z,16Z))', 'PS(19:0/20:5(5Z,8Z,11Z,14Z,17Z))', 'PS(19:1(9Z)/20:4(5Z,8Z,11Z,14Z))', 'PS(20:4(5Z,8Z,11Z,14Z)/19:1(9Z))', 'PS(20:5(5Z,8Z,11Z,14Z,17Z)/19:0)', 'PS(22:4(7Z,10Z,13Z,16Z)/17:1(9Z))']
822.673	23895.1	1.01978	0.985501	0
823.532	106177	1.03314	0.791258	0
823.688	6364.12	0.902404	0.953489	0
824.518	4027.28	1.05985	0.791258	C46H78NO7P	[M+(37Cl)]-	824.518	-0.51	['NA']
824.545	212834	1.05147	0.801449	C43H76NO8P	[M+Hac-H]-	824.545	-0.21	['PC(15:0/20:5(5Z,8Z,11Z,14Z,17Z))', 'PC(15:1(9Z)/20:4(5Z,8Z,11Z,14Z))', 'PC(17:1(9Z)/18:4(6Z,9Z,12Z,15Z))', 'PC(17:2(9Z,12Z)/18:3(6Z,9Z,12Z))', 'PC(17:2(9Z,12Z)/18:3(9Z,12Z,15Z))', 'PC(18:3(6Z,9Z,12Z)/17:2(9Z,12Z))', 'PC(18:3(9Z,12Z,15Z)/17:2(9Z,12Z))', 'PC(18:4(6Z,9Z,12Z,15Z)/17:1(9Z))', 'PC(20:4(5Z,8Z,11Z,14Z)/15:1(9Z))', 'PC(20:5(5Z,8Z,11Z,14Z,17Z)/15:0)', 'PE(16:1(9Z)/22:4(7Z,10Z,13Z,16Z))',…
824.545	212834	1.05147	0.801449	C45H80NO10P	[M-H]-	824.545	-0.21	['PS(17:0/22:4(7Z,10Z,13Z,16Z))', 'PS(17:2(9Z,12Z)/22:2(13Z,16Z))', 'PS(18:4(6Z,9Z,12Z,15Z)/21:0)', 'PS(19:0/20:4(5Z,8Z,11Z,14Z))', 'PS(19:1(9Z)/20:3(8Z,11Z,14Z))', 'PS(20:3(8Z,11Z,14Z)/19:1(9Z))', 'PS(20:4(5Z,8Z,11Z,14Z)/19:0)', 'PS(21:0/18:4(6Z,9Z,12Z,15Z))', 'PS(22:2(13Z,16Z)/17:2(9Z,12Z))', 'PS(22:4(7Z,10Z,13Z,16Z)/17:0)']
824.617	39707.4	1.00982	0.796789	C47H88NO8P	[M-H]-	824.617	-0.39	['PC(17:1(9Z)/22:2(13Z,16Z))', 'PC(17:2(9Z,12Z)/22:1(11Z))', 'PC(18:3(6Z,9Z,12Z)/21:0)', 'PC(18:3(9Z,12Z,15Z)/21:0)', 'PC(19:0/20:3(8Z,11Z,14Z))', 'PC(19:1(9Z)/20:2(11Z,14Z))', 'PC(20:2(11Z,14Z)/19:1(9Z))', 'PC(20:3(8Z,11Z,14Z)/19:0)', 'PC(21:0/18:3(6Z,9Z,12Z))', 'PC(21:0/18:3(9Z,12Z,15Z))', 'PC(22:1(11Z)/17:2(9Z,12Z))', 'PC(22:2(13Z,16Z)/17:1(9Z))', 'PE(20:1(11Z)/22:2(13Z,16Z))', 'PE(20:2(11Z,14…
825.456	7387.15	1.04611	0.76838	C43H71O13P	[M-H]-	825.456	0.06	['PI(12:0/22:6(4Z,7Z,10Z,13Z,16Z,19Z))', 'PI(14:1(9Z)/20:5(5Z,8Z,11Z,14Z,17Z))', 'PI(20:5(5Z,8Z,11Z,14Z,17Z)/14:1(9Z))', 'PI(22:6(4Z,7Z,10Z,13Z,16Z,19Z)/12:0)']
825.549	92374.3	1.04385	0.81818	0
825.621	19599.9	0.989769	0.791258	0
825.702	7161.04	0.918107	0.951168	0
826.56	269966	1.05163	0.801449	C43H78NO8P	[M+Hac-H]-	826.56	-0.19	['PC(13:0/22:4(7Z,10Z,13Z,16Z))', 'PC(15:0/20:4(5Z,8Z,11Z,14Z))', 'PC(15:1(9Z)/20:3(8Z,11Z,14Z))', 'PC(17:0/18:4(6Z,9Z,12Z,15Z))', 'PC(17:1(9Z)/18:3(6Z,9Z,12Z))', 'PC(17:1(9Z)/18:3(9Z,12Z,15Z))', 'PC(17:2(9Z,12Z)/18:2(9Z,12Z))', 'PC(18:2(9Z,12E)/17:2(9Z,11E))', 'PC(18:2(9Z,12Z)/17:2(9Z,12Z))', 'PC(18:3(6Z,9Z,12Z)/17:1(9Z))', 'PC(18:3(9Z,12Z,15Z)/17:1(9Z))', 'PC(18:4(6Z,9Z,12Z,15Z)/17:0)', 'PC(20:…
826.56	269966	1.05163	0.801449	C45H82NO10P	[M-H]-	826.56	-0.19	['PS(17:1(9Z)/22:2(13Z,16Z))', 'PS(17:2(9Z,12Z)/22:1(11Z))', 'PS(18:3(6Z,9Z,12Z)/21:0)', 'PS(18:3(9Z,12Z,15Z)/21:0)', 'PS(19:0/20:3(8Z,11Z,14Z))', 'PS(19:1(9Z)/20:2(11Z,14Z))', 'PS(20:2(11Z,14Z)/19:1(9Z))', 'PS(20:3(8Z,11Z,14Z)/19:0)', 'PS(21:0/18:3(6Z,9Z,12Z))', 'PS(21:0/18:3(9Z,12Z,15Z))', 'PS(22:1(11Z)/17:2(9Z,12Z))', 'PS(22:2(13Z,16Z)/17:1(9Z))']
827.472	9624.9	1.16386	0.801449	C45H76O7P2	[M+(37Cl)]-	827.473	-1.7	['all-trans-Nonaprenyl diphosphate']
827.472	9624.9	1.16386	0.801449	C43H73O13P	[M-H]-	827.472	0.09	['PI(14:0/20:5(5Z,8Z,11Z,14Z,17Z))', 'PI(14:1(9Z)/20:4(5Z,8Z,11Z,14Z))', 'PI(16:1(9Z)/18:4(6Z,9Z,12Z,15Z))', 'PI(18:4(6Z,9Z,12Z,15Z)/16:1(9Z))', 'PI(20:4(5Z,8Z,11Z,14Z)/14:1(9Z))', 'PI(20:5(5Z,8Z,11Z,14Z,17Z)/14:0)']
827.547	2901.83	1.31639	0.720442	0
827.564	119827	1.07832	0.730251	0
828.55	3264.42	1.39805	0.801449	C46H82NO7P	[M+(37Cl)]-	828.549	1.35	['PC(P-18:0/20:5(5Z,8Z,11Z,14Z,17Z))', 'PC(o-16:0/22:6(4Z,7Z,10Z,13Z,16Z,19Z))']
828.577	174825	1.02469	0.901363	C43H80NO8P	[M+Hac-H]-	828.576	0.68	['PC(15:0/20:3(8Z,11Z,14Z))', 'PC(15:1(9Z)/20:2(11Z,14Z))', 'PC(17:0/18:3(6Z,9Z,12Z))', 'PC(17:0/18:3(9Z,12Z,15Z))', 'PC(17:1(9Z)/18:2(9Z,12Z))', 'PC(17:2(9Z,12Z)/18:1(9Z))', 'PC(18:1(9Z)/17:2(9Z,12Z))', 'PC(18:2(9Z,12Z)/17:1(9Z))', 'PC(18:3(6Z,9Z,12Z)/17:0)', 'PC(18:3(9Z,12Z,15Z)/17:0)', 'PC(20:2(11Z,14Z)/15:1(9Z))', 'PC(20:3(8Z,11Z,14Z)/15:0)', 'PE(16:1(9Z)/22:2(13Z,16Z))', 'PE(18:0/20:3(8Z,11Z…
828.577	174825	1.02469	0.901363	C45H84NO10P	[M-H]-	828.576	0.68	['PS(17:0/22:2(13Z,16Z))', 'PS(17:1(9Z)/22:1(11Z))', 'PS(17:2(9Z,12Z)/22:0)', 'PS(18:2(9Z,12Z)/21:0)', 'PS(19:0/20:2(11Z,14Z))', 'PS(19:1(9Z)/20:1(11Z))', 'PS(20:1(11Z)/19:1(9Z))', 'PS(20:2(11Z,14Z)/19:0)', 'PS(21:0/18:2(9Z,12Z))', 'PS(22:0/17:2(9Z,12Z))', 'PS(22:1(11Z)/17:1(9Z))', 'PS(22:2(13Z,16Z)/17:0)']
829.563	6264.83	0.862212	0.828255	0
829.581	78419.9	1.03658	0.923582	0
829.644	9872.04	0.989531	0.983488	C44H87N2O6P	[M+Hac-H]-	829.644	-0.63	['SM(d18:2/21:0)']
830.593	56941.5	1.04098	0.80334	C43H82NO8P	[M+Hac-H]-	830.592	1.17	['PC(13:0/22:2(13Z,16Z))', 'PC(15:0/20:2(11Z,14Z))', 'PC(15:1(9Z)/20:1(11Z))', 'PC(16:1(9Z)/19:1(9Z))', 'PC(17:0/18:2(9Z,12Z))', 'PC(17:1(9Z)/18:1(9Z))', 'PC(17:2(9Z,12Z)/18:0)', 'PC(18:0/17:2(9Z,12Z))', 'PC(18:1(9Z)/17:1(9Z))', 'PC(18:2(9Z,12Z)/17:0)', 'PC(19:1(9Z)/16:1(9Z))', 'PC(20:1(11Z)/15:1(9Z))', 'PC(20:2(11Z,14Z)/15:0)', 'PC(22:2(13Z,16Z)/13:0)', 'PE(16:0/22:2(13Z,16Z))', 'PE(16:1(9Z)/22:…
830.593	56941.5	1.04098	0.80334	C45H86NO10P	[M-H]-	830.592	1.17	['PS(17:0/22:1(11Z))', 'PS(17:1(9Z)/22:0)', 'PS(18:1(9Z)/21:0)', 'PS(19:0/20:1(11Z))', 'PS(19:1(9Z)/20:0)', 'PS(20:0/19:1(9Z))', 'PS(20:1(11Z)/19:0)', 'PS(21:0/18:1(9Z))', 'PS(22:0/17:1(9Z))', 'PS(22:1(11Z)/17:0)']
831.596	29615.4	1.0707	0.801449	0
831.659	26121	1.03526	0.951168	C44H89N2O6P	[M+Hac-H]-	831.66	-0.25	['SM(d16:1/23:0)', 'SM(d17:1/22:0)', 'SM(d18:1/21:0)', 'SM(d19:1/20:0)', 'SM(d20:1/19:0)']
832.609	20299.2	0.978533	0.951168	C47H89NO8	[M+K-2H]-	832.607	1.82	['GalCer(d18:2/23:0)', 'GlcCer(d18:2/23:0)']
832.609	20299.2	0.978533	0.951168	C43H84NO8P	[M+Hac-H]-	832.607	1.96	['PC(13:0/22:1(11Z))', 'PC(14:1(9Z)/21:0)', 'PC(15:0/20:1(11Z))', 'PC(15:1(9Z)/20:0)', 'PC(16:0/19:1(9Z))', 'PC(16:1(9Z)/19:0)', 'PC(17:0/18:1(9Z))', 'PC(17:1(9Z)/18:0)', 'PC(18:0/17:1(9Z))', 'PC(18:1(9Z)/17:0)', 'PC(19:0/16:1(9Z))', 'PC(19:1(9Z)/16:0)', 'PC(20:0/15:1(9Z))', 'PC(20:1(11Z)/15:0)', 'PC(21:0/14:1(9Z))', 'PC(22:1(11Z)/13:0)', 'PE(16:0/22:1(11Z))', 'PE(16:0/22:1(13Z))', 'PE(16:1(9Z)/2…
832.609	20299.2	0.978533	0.951168	C45H88NO10P	[M-H]-	832.607	1.96	['PS(17:0/22:0)', 'PS(18:0/21:0)', 'PS(19:0/20:0)', 'PS(20:0/19:0)', 'PS(21:0/18:0)', 'PS(22:0/17:0)']
832.644	10356.3	1.0528	0.882498	C47H91NO8	[M+Cl]-	832.644	-0.25	['GalCer(d18:1/23:0)', 'GlcCer(d18:1/23:0)']
832.644	10356.3	1.0528	0.882498	C44H88NO7P	[M+Hac-H]-	832.644	-0.04	['PC(O-16:0/20:1(11Z))', 'PC(O-16:0/20:1(9Z))', 'PC(O-18:0/18:1(9Z))', 'PC(O-20:0/16:1(9Z))', 'PC(P-16:0/20:0)', 'PC(P-18:0/18:0)', 'PC(P-20:0/16:0)', 'PE(O-20:0/19:1(9Z))', 'PE(P-18:0/21:0)', 'PE(P-20:0/19:0)']
832.644	10356.3	1.0528	0.882498	C46H92NO9P	[M-H]-	832.644	-0.04	['PS(O-18:0/22:0)', 'PS(O-20:0/20:0)']
832.663	12213.9	1.19968	0.801449	C48H93NO8	[M+Na-2H]-	832.665	-1.73	['GalCer(d18:1/24:0)', 'GlcCer(d18:0/24:1(15Z))', 'Glucosylceramide (d18:1/24:0)']
833.503	11382.6	0.901963	0.500441	0
834.522	32486.2	0.97027	0.720442	C44H80NO9P	[M+(37Cl)]-	834.524	-1.51	['PC(16:0/20:4(5Z,8Z,10E,14Z)(12OH[S]))', 'PC(16:0/20:4(6E,8Z,11Z,14Z)(5OH[S]))', 'PS(O-16:0/22:4(7Z,10Z,13Z,16Z))', 'PS(O-18:0/20:4(5Z,8Z,11Z,14Z))', 'PS(O-20:0/18:4(6Z,9Z,12Z,15Z))', 'PS(P-18:0/20:3(8Z,11Z,14Z))', 'PS(P-20:0/18:3(6Z,9Z,12Z))', 'PS(P-20:0/18:3(9Z,12Z,15Z))']
835.537	14475.8	1.20622	0.830956	0
835.649	23008.7	1.06373	0.963051	0
836.516	5850.89	1.01004	0.980936	0
836.525	9054.53	1.21641	0.801449	0
836.544	682353	1.05731	0.801449	C44H76NO8P	[M+Hac-H]-	836.545	-0.67	['PC(14:0/22:6(4Z,7Z,10Z,13Z,16Z,19Z))', 'PC(16:1(9Z)/20:5(5Z,8Z,11Z,14Z,17Z))', 'PC(18:2(9Z,12Z)/18:4(6Z,9Z,12Z,15Z))', 'PC(18:3(6Z,9Z,12Z)/18:3(6Z,9Z,12Z))', 'PC(18:3(6Z,9Z,12Z)/18:3(9Z,12Z,15Z))', 'PC(18:3(9E,11E,13E)/18:3(9E,11E,13E))', 'PC(18:3(9Z,11E,13E)/18:3(9Z,11E,13E))', 'PC(18:3(9Z,12Z,15Z)/18:3(6Z,9Z,12Z))', 'PC(18:3(9Z,12Z,15Z)/18:3(9Z,12Z,15Z))', 'PC(18:4(6Z,9Z,12Z,15Z)/18:2(9Z,12Z)…
836.544	682353	1.05731	0.801449	C46H80NO10P	[M-H]-	836.545	-0.67	['PS(18:1(9Z)/22:4(7Z,10Z,13Z,16Z))', 'PS(18:3(6Z,9Z,12Z)/22:2(13Z,16Z))', 'PS(18:3(9Z,12Z,15Z)/22:2(13Z,16Z))', 'PS(18:4(6Z,9Z,12Z,15Z)/22:1(11Z))', 'PS(20:0/20:5(5Z,8Z,11Z,14Z,17Z))', 'PS(20:1(11Z)/20:4(5Z,8Z,11Z,14Z))', 'PS(20:2(11Z,14Z)/20:3(8Z,11Z,14Z))', 'PS(20:3(8Z,11Z,14Z)/20:2(11Z,14Z))', 'PS(20:4(5Z,8Z,11Z,14Z)/20:1(11Z))', 'PS(20:5(5Z,8Z,11Z,14Z,17Z)/20:0)', 'PS(22:1(11Z)/18:4(6Z,9Z,12…
836.573	2499.56	1.07763	0.951106	C48H84NO6P	[M+Cl]-	836.573	0.46	['NA']
836.652	14061	0.988162	0.999284	C47H94NO7P	[M+Na-2H]-	836.651	0.69	['PC(O-20:0/19:1(9Z))', 'PC(P-18:0/21:0)', 'PC(P-20:0/19:0)', 'PE(O-20:0/22:1(11Z))', 'PE(P-20:0/22:0)']
837.548	340937	1.05456	0.80334	0
837.569	2816.69	1.12782	0.749274	0
837.665	66994.8	1.02	0.985501	0
838.532	8405.54	1.06991	0.791258	0
838.541	19248.3	1.08338	0.791258	C49H78NO8P	[M-H]-	838.539	1.97	['PE(22:4(7Z,10Z,13Z,16Z)/22:6(4Z,7Z,10Z,13Z,16Z,19Z))', 'PE(22:6(4Z,7Z,10Z,13Z,16Z,19Z)/22:4(7Z,10Z,13Z,16Z))']
838.56	725368	1.07792	0.76838	C44H78NO8P	[M+Hac-H]-	838.56	-0.3	['PC(14:1(9Z)/22:4(7Z,10Z,13Z,16Z))', 'PC(16:0/20:5(5Z,8Z,11Z,14Z,17Z))', 'PC(16:1(7Z)/20:4(5Z,8Z,11Z,14Z))', 'PC(16:1(9Z)/20:4(5Z,8Z,11Z,14Z))', 'PC(18:1(9Z)/18:4(6Z,9Z,12Z,15Z))', 'PC(18:2(9Z,12Z)/18:3(6Z,9Z,12Z))', 'PC(18:2(9Z,12Z)/18:3(9Z,12Z,15Z))', 'PC(18:3(6Z,9Z,12Z)/18:2(9Z,12Z))', 'PC(18:3(9Z,12Z,15Z)/18:2(9Z,12Z))', 'PC(18:4(6Z,9Z,12Z,15Z)/18:1(9Z))', 'PC(20:4(5Z,8Z,11Z,14Z)/16:1(9Z))',…
838.56	725368	1.07792	0.76838	C46H82NO10P	[M-H]-	838.56	-0.3	['PS(18:0/22:4(7Z,10Z,13Z,16Z))', 'PS(18:2(9Z,12Z)/22:2(13Z,16Z))', 'PS(18:3(6Z,9Z,12Z)/22:1(11Z))', 'PS(18:3(9Z,12Z,15Z)/22:1(11Z))', 'PS(18:4(6Z,9Z,12Z,15Z)/22:0)', 'PS(20:0/20:4(5Z,8Z,11Z,14Z))', 'PS(20:1(11Z)/20:3(8Z,11Z,14Z))', 'PS(20:2(11Z,14Z)/20:2(11Z,14Z))', 'PS(20:3(8Z,11Z,14Z)/20:1(11Z))', 'PS(20:4(5Z,8Z,11Z,14Z)/20:0)', 'PS(22:0/18:4(6Z,9Z,12Z,15Z))', 'PS(22:1(11Z)/18:3(6Z,9Z,12Z))', …
838.668	38173.3	1.00651	0.999467	C47H96NO7P	[M+Na-2H]-	838.667	0.8	['PC(O-17:0/22:0)', 'PC(O-18:0/21:0)', 'PC(O-20:0/19:0)', 'PE(O-20:0/22:0)']
839.535	3143.33	1.19743	0.791258	C47H81O8P	[M+Cl]-	839.536	-1.1	['PA(22:0/22:6(4Z,7Z,10Z,13Z,16Z,19Z))', 'PA(22:2(13Z,16Z)/22:4(7Z,10Z,13Z,16Z))', 'PA(22:4(7Z,10Z,13Z,16Z)/22:2(13Z,16Z))', 'PA(22:6(4Z,7Z,10Z,13Z,16Z,19Z)/22:0)']
839.543	6455.46	1.05449	0.801449	C44H77O9P	[M+Hac-H]-	839.544	-1.18	['PG(O-16:0/22:6(4Z,7Z,10Z,13Z,16Z,19Z))', 'PG(P-18:0/20:5(5Z,8Z,11Z,14Z,17Z))']
839.563	377732	1.07486	0.76838	0
839.627	3552.4	1.00007	0.998079	0
839.666	2502.74	0.942251	0.791258	0
839.683	9489.48	1.02595	0.998079	0
840.575	805752	1.05805	0.801449	C44H80NO8P	[M+Hac-H]-	840.576	-0.74	['PC(14:0/22:4(7Z,10Z,13Z,16Z))', 'PC(16:0/20:4(5E,8E,11E,14E))', 'PC(16:0/20:4(5Z,8Z,11Z,14Z))', 'PC(16:1(9Z)/20:3(8Z,11Z,14Z))', 'PC(18:0/18:4(6Z,9Z,12Z,15Z))', 'PC(18:0/18:4(9E,11E,13E,15E))', 'PC(18:1(9Z)/18:3(6Z,9Z,12Z))', 'PC(18:1(9Z)/18:3(9Z,12Z,15Z))', 'PC(18:2(2E,4E)/18:2(2E,4E))', 'PC(18:2(2Z,4Z)/18:2(2Z,4Z))', 'PC(18:2(6Z,9Z)/18:2(6Z,9Z))', 'PC(18:2(9Z,11Z)/18:2(9Z,11Z))', 'PC(18:2(9Z,…
840.575	805752	1.05805	0.801449	C46H84NO10P	[M-H]-	840.576	-0.74	['PS(18:1(9Z)/22:2(13Z,16Z))', 'PS(18:2(9Z,12Z)/22:1(11Z))', 'PS(18:3(6Z,9Z,12Z)/22:0)', 'PS(18:3(9Z,12Z,15Z)/22:0)', 'PS(20:0/20:3(8Z,11Z,14Z))', 'PS(20:1(11Z)/20:2(11Z,14Z))', 'PS(20:2(11Z,14Z)/20:1(11Z))', 'PS(20:3(8Z,11Z,14Z)/20:0)', 'PS(22:0/18:3(6Z,9Z,12Z))', 'PS(22:0/18:3(9Z,12Z,15Z))', 'PS(22:1(11Z)/18:2(9Z,12Z))', 'PS(22:2(13Z,16Z)/18:1(9Z))']
840.595	7464.51	1.02856	0.81818	0
840.605	3393.03	1.07504	0.509688	C48H88NO6P	[M+Cl]-	840.604	0.58	['NA']
840.684	6407.07	0.870479	0.801449	0
841.579	421736	1.05904	0.801449	0
841.599	4275.8	1.00984	0.818844	0
842.496	5891.69	1.05133	0.951168	C45H70NO8P	[M+Hac-H]-	842.498	-1.61	['PE(18:4(6Z,9Z,12Z,15Z)/22:6(4Z,7Z,10Z,13Z,16Z,19Z))', 'PE(20:5(5Z,8Z,11Z,14Z,17Z)/20:5(5Z,8Z,11Z,14Z,17Z))', 'PE(22:6(4Z,7Z,10Z,13Z,16Z,19Z)/18:4(6Z,9Z,12Z,15Z))']
842.496	5891.69	1.05133	0.951168	C45H76NO10P	[M+Na-2H]-	842.495	1.24	['PS(17:0/22:6(4Z,7Z,10Z,13Z,16Z,19Z))', 'PS(17:2(9Z,12Z)/22:4(7Z,10Z,13Z,16Z))', 'PS(19:1(9Z)/20:5(5Z,8Z,11Z,14Z,17Z))', 'PS(20:5(5Z,8Z,11Z,14Z,17Z)/19:1(9Z))', 'PS(22:4(7Z,10Z,13Z,16Z)/17:2(9Z,12Z))', 'PS(22:6(4Z,7Z,10Z,13Z,16Z,19Z)/17:0)']
842.563	8296.2	1.07459	0.791258	0
842.592	410297	1.02253	0.951168	C44H82NO8P	[M+Hac-H]-	842.592	0.56	['PC(14:1(9Z)/22:2(13Z,16Z))', 'PC(16:0/20:3(5Z,8Z,11Z))', 'PC(16:0/20:3(8E,11E,14E))', 'PC(16:0/20:3(8Z,11Z,14Z))', 'PC(16:1(9Z)/20:2(11Z,14Z))', 'PC(17:2(9Z,12Z)/19:1(9Z))', 'PC(18:0/18:3(6Z,9Z,12Z))', 'PC(18:0/18:3(9Z,12Z,15Z))', 'PC(18:1(9Z)/18:2(6Z,9Z))', 'PC(18:1(9Z)/18:2(9Z,12Z))', 'PC(18:2(9Z,12Z)/18:1(9Z))', 'PC(18:3(6Z,9Z,12Z)/18:0)', 'PC(18:3(9Z,12Z,15Z)/18:0)', 'PC(19:1(9Z)/17:2(9Z,12…
842.592	410297	1.02253	0.951168	C46H86NO10P	[M-H]-	842.592	0.56	['PS(18:0/22:2(13Z,16Z))', 'PS(18:1(9Z)/22:1(11Z))', 'PS(18:2(9Z,12Z)/22:0)', 'PS(20:0/20:2(11Z,14Z))', 'PS(20:1(11Z)/20:1(11Z))', 'PS(20:2(11Z,14Z)/20:0)', 'PS(22:0/18:2(9Z,12Z))', 'PS(22:1(11Z)/18:1(9Z))', 'PS(22:2(13Z,16Z)/18:0)']
842.699	8262.62	0.943004	0.953849	C49H98NO7P	[M-H]-	842.701	-1.67	['PC(P-20:0/21:0)']
843.502	12534.7	1.02835	0.76838	C44H77O13P	[M-H]-	843.503	-0.79	['PI(13:0/22:4(7Z,10Z,13Z,16Z))', 'PI(15:0/20:4(5Z,8Z,11Z,14Z))', 'PI(15:1(9Z)/20:3(8Z,11Z,14Z))', 'PI(17:0/18:4(6Z,9Z,12Z,15Z))', 'PI(17:1(9Z)/18:3(6Z,9Z,12Z))', 'PI(17:1(9Z)/18:3(9Z,12Z,15Z))', 'PI(17:2(9Z,12Z)/18:2(9Z,12Z))', 'PI(18:2(9Z,12Z)/17:2(9Z,12Z))', 'PI(18:3(6Z,9Z,12Z)/17:1(9Z))', 'PI(18:3(9Z,12Z,15Z)/17:1(9Z))', 'PI(18:4(6Z,9Z,12Z,15Z)/17:0)', 'PI(20:3(8Z,11Z,14Z)/15:1(9Z))', 'PI(20:…
843.576	9278.96	0.917245	0.817102	C44H81O9P	[M+Hac-H]-	843.576	0.55	['PG(O-16:0/22:4(7Z,10Z,13Z,16Z))', 'PG(O-18:0/20:4(5Z,8Z,11Z,14Z))', 'PG(O-20:0/18:4(6Z,9Z,12Z,15Z))', 'PG(P-18:0/20:3(8Z,11Z,14Z))', 'PG(P-20:0/18:3(6Z,9Z,12Z))', 'PG(P-20:0/18:3(9Z,12Z,15Z))']
843.595	219612	1.02831	0.951168	0
843.659	24843.1	1.01331	0.951168	C45H89N2O6P	[M+Hac-H]-	843.66	-0.49	['SM(d16:1/24:1)', 'SM(d18:1/22:1(13Z))', 'SM(d18:2/22:0)']
844.511	21481.8	1.00762	0.791258	C45H78NO10P	[M+Na-2H]-	844.511	-0.28	['PS(17:1(9Z)/22:4(7Z,10Z,13Z,16Z))', 'PS(19:0/20:5(5Z,8Z,11Z,14Z,17Z))', 'PS(19:1(9Z)/20:4(5Z,8Z,11Z,14Z))', 'PS(20:4(5Z,8Z,11Z,14Z)/19:1(9Z))', 'PS(20:5(5Z,8Z,11Z,14Z,17Z)/19:0)', 'PS(22:4(7Z,10Z,13Z,16Z)/17:1(9Z))']
844.591	13692.1	1.08966	0.801449	0
844.609	101494	1.01255	0.81818	C44H84NO8P	[M+Hac-H]-	844.607	1.6	['PC(14:0/22:2(13Z,16Z))', 'PC(14:1(9Z)/22:1(11Z))', 'PC(16:0/20:2(11Z,14Z))', 'PC(16:1(9Z)/20:1(11Z))', 'PC(17:1(9Z)/19:1(9Z))', 'PC(17:2(9Z,12Z)/19:0)', 'PC(18:0/18:2(10Z,12Z))', 'PC(18:0/18:2(2E,4E))', 'PC(18:0/18:2(6Z,9Z))', 'PC(18:0/18:2(9Z,12Z))', 'PC(18:1(10Z)/18:1(10Z))', 'PC(18:1(11E)/18:1(11E))', 'PC(18:1(11Z)/18:1(11Z))', 'PC(18:1(12Z)/18:1(12Z))', 'PC(18:1(13Z)/18:1(13Z))', 'PC(18:1(1…
844.609	101494	1.01255	0.81818	C46H88NO10P	[M-H]-	844.607	1.6	['PS(18:0/22:1(11Z))', 'PS(18:1(9Z)/22:0)', 'PS(19:1(9Z)/21:0)', 'PS(20:0/20:1(11Z))', 'PS(20:1(11Z)/20:0)', 'PS(21:0/19:1(9Z))', 'PS(22:0/18:1(9Z))', 'PS(22:1(11Z)/18:0)']
844.663	12769.9	1.04058	0.791258	0
845.518	29621.7	1.01533	0.76838	C42H81O13P	[M+Na-2H]-	845.516	1.99	['PI(12:0/21:0)', 'PI(13:0/20:0)', 'PI(14:0/19:0)', 'PI(15:0/18:0)', 'PI(16:0/17:0)', 'PI(17:0/16:0)', 'PI(18:0/15:0)', 'PI(19:0/14:0)', 'PI(20:0/13:0)', 'PI(21:0/12:0)']
845.518	29621.7	1.01533	0.76838	C44H79O13P	[M-H]-	845.519	-0.86	['PI(15:0/20:3(8Z,11Z,14Z))', 'PI(15:1(9Z)/20:2(11Z,14Z))', 'PI(17:0/18:3(6Z,9Z,12Z))', 'PI(17:0/18:3(9Z,12Z,15Z))', 'PI(17:1(9Z)/18:2(9Z,12Z))', 'PI(17:2(9Z,12Z)/18:1(9Z))', 'PI(18:1(9Z)/17:2(9Z,12Z))', 'PI(18:2(9Z,12Z)/17:1(9Z))', 'PI(18:3(6Z,9Z,12Z)/17:0)', 'PI(18:3(9Z,12Z,15Z)/17:0)', 'PI(20:2(11Z,14Z)/15:1(9Z))', 'PI(20:3(8Z,11Z,14Z)/15:0)']
845.592	1600.71	1.13556	0.951168	C44H83O9P	[M+Hac-H]-	845.591	1.16	['PG(O-18:0/20:3(8Z,11Z,14Z))', 'PG(O-20:0/18:3(6Z,9Z,12Z))', 'PG(O-20:0/18:3(9Z,12Z,15Z))', 'PG(P-16:0/22:2(13Z,16Z))', 'PG(P-18:0/20:2(11Z,14Z))', 'PG(P-20:0/18:2(9Z,12Z))']
845.611	62010.6	1.01428	0.984353	0
845.675	44455	1.0436	0.948232	C45H91N2O6P	[M+Hac-H]-	845.675	-0.06	['SM(d16:1/24:0)', 'SM(d18:1/22:0)']
846.49	6869.98	1.24186	0.818844	0
846.608	5707.22	1.15995	0.830956	0
846.625	19277.6	0.913389	0.791258	0
846.679	23008.1	1.06312	0.832212	0
847.627	12491.1	1.10211	0.836142	C47H91N2O6P	[M+(37Cl)]-	847.628	-0.72	['SM(d18:2/24:1)']
847.685	13226.3	1.1953	0.951168	0
848.688	6597.65	1.08819	0.983488	0
848.808	6249.68	0.681554	0.80334	0
849.702	7590.71	1.15279	0.873977	0
850.559	21940.3	1.01235	0.992349	C45H78NO8P	[M+Hac-H]-	850.56	-1.04	['PC(15:0/22:6(4Z,7Z,10Z,13Z,16Z,19Z))', 'PC(17:1(9Z)/20:5(5Z,8Z,11Z,14Z,17Z))', 'PC(17:2(9Z,12Z)/20:4(5Z,8Z,11Z,14Z))', 'PC(20:4(5Z,8Z,11Z,14Z)/17:2(9Z,12Z))', 'PC(20:5(5Z,8Z,11Z,14Z,17Z)/17:1(9Z))', 'PC(22:6(4Z,7Z,10Z,13Z,16Z,19Z)/15:0)', 'PE(18:0/22:6(4Z,7Z,10Z,13Z,16Z,19Z))', 'PE(18:2(9Z,12Z)/22:4(7Z,10Z,13Z,16Z))', 'PE(18:4(6Z,9Z,12Z,15Z)/22:2(13Z,16Z))', 'PE(20:1(11Z)/20:5(5Z,8Z,11Z,14Z,17Z…
850.559	21940.3	1.01235	0.992349	C45H84NO10P	[M+Na-2H]-	850.558	1.79	['PS(17:0/22:2(13Z,16Z))', 'PS(17:1(9Z)/22:1(11Z))', 'PS(17:2(9Z,12Z)/22:0)', 'PS(18:2(9Z,12Z)/21:0)', 'PS(19:0/20:2(11Z,14Z))', 'PS(19:1(9Z)/20:1(11Z))', 'PS(20:1(11Z)/19:1(9Z))', 'PS(20:2(11Z,14Z)/19:0)', 'PS(21:0/18:2(9Z,12Z))', 'PS(22:0/17:2(9Z,12Z))', 'PS(22:1(11Z)/17:1(9Z))', 'PS(22:2(13Z,16Z)/17:0)']
850.559	21940.3	1.01235	0.992349	C47H82NO10P	[M-H]-	850.56	-1.04	['PS(19:1(9Z)/22:4(7Z,10Z,13Z,16Z))', 'PS(20:5(5Z,8Z,11Z,14Z,17Z)/21:0)', 'PS(21:0/20:5(5Z,8Z,11Z,14Z,17Z))', 'PS(22:4(7Z,10Z,13Z,16Z)/19:1(9Z))']
852.539	8016.48	1.23095	0.76838	C44H76NO9P	[M+Hac-H]-	852.54	-0.7	['PS(O-16:0/22:6(4Z,7Z,10Z,13Z,16Z,19Z))', 'PS(P-18:0/20:5(5Z,8Z,11Z,14Z,17Z))']
852.576	13327.8	1.07462	0.801449	C45H80NO8P	[M+Hac-H]-	852.576	0.2	['PC(15:1(9Z)/22:4(7Z,10Z,13Z,16Z))', 'PC(17:0/20:5(5Z,8Z,11Z,14Z,17Z))', 'PC(17:1(9Z)/20:4(5Z,8Z,11Z,14Z))', 'PC(17:2(9Z,12Z)/20:3(8Z,11Z,14Z))', 'PC(18:4(6Z,9Z,12Z,15Z)/19:1(9Z))', 'PC(19:1(9Z)/18:4(6Z,9Z,12Z,15Z))', 'PC(20:3(8Z,11Z,14Z)/17:2(9Z,12Z))', 'PC(20:4(5Z,8Z,11Z,14Z)/17:1(9Z))', 'PC(20:5(5Z,8Z,11Z,14Z,17Z)/17:0)', 'PC(22:4(7Z,10Z,13Z,16Z)/15:1(9Z))', 'PE(18:1(9Z)/22:4(7Z,10Z,13Z,16Z))…
852.576	13327.8	1.07462	0.801449	C47H84NO10P	[M-H]-	852.576	0.2	['PS(19:0/22:4(7Z,10Z,13Z,16Z))', 'PS(20:4(5Z,8Z,11Z,14Z)/21:0)', 'PS(21:0/20:4(5Z,8Z,11Z,14Z))', 'PS(22:4(7Z,10Z,13Z,16Z)/19:0)']
854.49	32854.3	1.00441	0.805733	0
854.592	3884.81	1.85107	0.749274	C45H82NO8P	[M+Hac-H]-	854.592	-0.01	['PC(15:0/22:4(7Z,10Z,13Z,16Z))', 'PC(17:0/20:4(5Z,8Z,11Z,14Z))', 'PC(17:1(9Z)/20:3(8Z,11Z,14Z))', 'PC(17:2(9Z,12Z)/20:2(11Z,14Z))', 'PC(18:3(6Z,9Z,12Z)/19:1(9Z))', 'PC(18:3(9Z,12Z,15Z)/19:1(9Z))', 'PC(18:4(6Z,9Z,12Z,15Z)/19:0)', 'PC(19:0/18:4(6Z,9Z,12Z,15Z))', 'PC(19:1(9Z)/18:3(6Z,9Z,12Z))', 'PC(19:1(9Z)/18:3(9Z,12Z,15Z))', 'PC(20:2(11Z,14Z)/17:2(9Z,12Z))', 'PC(20:3(8Z,11Z,14Z)/17:1(9Z))', 'PC(2…
854.592	3884.81	1.85107	0.749274	C47H86NO10P	[M-H]-	854.592	-0.01	['PS(19:1(9Z)/22:2(13Z,16Z))', 'PS(20:3(8Z,11Z,14Z)/21:0)', 'PS(21:0/20:3(8Z,11Z,14Z))', 'PS(22:2(13Z,16Z)/19:1(9Z))']
855.482	2312.69	1.17658	0.76838	0
855.596	6234.14	1.2823	0.730529	0
856.506	48017.5	1.05856	0.80334	C46H78NO9P	[M+(37Cl)]-	856.508	-1.93	['PS(P-18:0/22:6(4Z,7Z,10Z,13Z,16Z,19Z))']
856.608	8879.77	1.21748	0.791258	C45H84NO8P	[M+Hac-H]-	856.607	0.62	['PC(15:1(9Z)/22:2(13Z,16Z))', 'PC(17:0/20:3(8Z,11Z,14Z))', 'PC(17:1(9Z)/20:2(11Z,14Z))', 'PC(17:2(9Z,12Z)/20:1(11Z))', 'PC(18:2(9Z,12Z)/19:1(9Z))', 'PC(18:3(6Z,9Z,12Z)/19:0)', 'PC(18:3(9Z,12Z,15Z)/19:0)', 'PC(19:0/18:3(6Z,9Z,12Z))', 'PC(19:0/18:3(9Z,12Z,15Z))', 'PC(19:1(9Z)/18:2(9Z,12Z))', 'PC(20:1(11Z)/17:2(9Z,12Z))', 'PC(20:2(11Z,14Z)/17:1(9Z))', 'PC(20:3(8Z,11Z,14Z)/17:0)', 'PC(22:2(13Z,16Z)/…
856.608	8879.77	1.21748	0.791258	C47H88NO10P	[M-H]-	856.607	0.62	['PS(19:0/22:2(13Z,16Z))', 'PS(19:1(9Z)/22:1(11Z))', 'PS(20:2(11Z,14Z)/21:0)', 'PS(21:0/20:2(11Z,14Z))', 'PS(22:1(11Z)/19:1(9Z))', 'PS(22:2(13Z,16Z)/19:0)']
857.489	2813.93	1.15838	0.720442	0
857.498	4750.6	1.09995	0.801449	0
858.493	1349.94	1.17818	0.720442	0
858.587	8446.7	1.19492	0.801449	C44H82NO9P	[M+Hac-H]-	858.587	0.54	['PS(O-18:0/20:3(8Z,11Z,14Z))', 'PS(O-20:0/18:3(6Z,9Z,12Z))', 'PS(O-20:0/18:3(9Z,12Z,15Z))', 'PS(P-16:0/22:2(13Z,16Z))', 'PS(P-18:0/20:2(11Z,14Z))', 'PS(P-20:0/18:2(9Z,12Z))']
859.505	2181.44	1.33269	0.509688	0
859.69	9197.15	0.997227	0.985501	C46H93N2O6P	[M+Hac-H]-	859.691	-0.73	['SM(d16:1/25:0)', 'SM(d17:1/24:0)', 'SM(d18:1/23:0)']
861.519	1695.12	1.241	0.720442	0
861.533	7674.34	1.06694	0.791258	0
862.553	28139.3	1.04661	0.720442	0
863.567	18507.1	0.999132	0.843346	C45H85O13P	[M-H]-	863.566	1.61	['PI(14:0/22:1(11Z))', 'PI(14:1(9Z)/22:0)', 'PI(15:1(9Z)/21:0)', 'PI(16:0/20:1(11Z))', 'PI(16:1(9Z)/20:0)', 'PI(17:0/19:1(9Z))', 'PI(17:1(9Z)/19:0)', 'PI(18:0/18:1(9Z))', 'PI(18:1(9Z)/18:0)', 'PI(19:0/17:1(9Z))', 'PI(19:1(9Z)/17:0)', 'PI(20:0/16:1(9Z))', 'PI(20:1(11Z)/16:0)', 'PI(21:0/15:1(9Z))', 'PI(22:0/14:1(9Z))', 'PI(22:1(11Z)/14:0)']
863.68	22353.6	1.08338	0.951168	0
864.576	44499.6	1.11533	0.720442	C46H80NO8P	[M+Hac-H]-	864.576	0	['PC(16:0/22:6(4E,7E,10E,13E,16E,19E))', 'PC(16:0/22:6(4Z,7Z,10Z,13Z,16Z,19Z))', 'PC(18:1(11Z)/20:5(5Z,8Z,11Z,14Z,17Z))', 'PC(18:1(9Z)/20:5(5Z,8Z,11Z,14Z,17Z))', 'PC(18:2(9Z,12Z)/20:4(5Z,8Z,11Z,14Z))', 'PC(18:3(6Z,9Z,12Z)/20:3(8Z,11Z,14Z))', 'PC(18:3(9Z,12Z,15Z)/20:3(8Z,11Z,14Z))', 'PC(18:4(6Z,9Z,12Z,15Z)/20:2(11Z,14Z))', 'PC(20:2(11Z,14Z)/18:4(6Z,9Z,12Z,15Z))', 'PC(20:3(8Z,11Z,14Z)/18:3(6Z,9Z,12…
864.576	44499.6	1.11533	0.720442	C48H84NO10P	[M-H]-	864.576	0	['PS(20:1(11Z)/22:4(7Z,10Z,13Z,16Z))', 'PS(20:3(8Z,11Z,14Z)/22:2(13Z,16Z))', 'PS(20:4(5Z,8Z,11Z,14Z)/22:1(11Z))', 'PS(20:5(5Z,8Z,11Z,14Z,17Z)/22:0)', 'PS(22:0/20:5(5Z,8Z,11Z,14Z,17Z))', 'PS(22:1(11Z)/20:4(5Z,8Z,11Z,14Z))', 'PS(22:2(13Z,16Z)/20:3(8Z,11Z,14Z))', 'PS(22:4(7Z,10Z,13Z,16Z)/20:1(11Z))']
864.683	14422.7	1.04146	0.985501	C49H98NO7P	[M+Na-2H]-	864.683	0.38	['PC(P-20:0/21:0)']
865.579	22594.8	1.27816	0.791258	0
865.697	12691.5	0.948866	0.932248	0
866.554	30554.3	1.22564	0.801449	C45H78NO9P	[M+Hac-H]-	866.555	-0.96	['PE(18:0/22:6(4Z,7Z,10Z,12E,16Z,19Z)(14OH))']
866.592	33278.9	1.07224	0.791258	C46H82NO8P	[M+Hac-H]-	866.592	0.36	['PC(16:0/22:5(4Z,7Z,10Z,13Z,16Z))', 'PC(16:0/22:5(7Z,10Z,13Z,16Z,19Z))', 'PC(16:1(9Z)/22:4(7Z,10Z,13Z,16Z))', 'PC(18:0/20:5(5Z,8Z,11Z,14Z,17Z))', 'PC(18:0/20:5(9Z,11Z,13Z,15Z,17Z))', 'PC(18:1(9Z)/20:4(5Z,8Z,11Z,14Z))', 'PC(18:2(9Z,12Z)/20:3(8Z,11Z,14Z))', 'PC(18:3(6Z,9Z,12Z)/20:2(11Z,14Z))', 'PC(18:3(9Z,12Z,15Z)/20:2(11Z,14Z))', 'PC(18:4(6Z,9Z,12Z,15Z)/20:1(11Z))', 'PC(20:1(11Z)/18:4(6Z,9Z,12Z,1…
866.592	33278.9	1.07224	0.791258	C48H86NO10P	[M-H]-	866.592	0.36	['PS(20:0/22:4(7Z,10Z,13Z,16Z))', 'PS(20:2(11Z,14Z)/22:2(13Z,16Z))', 'PS(20:3(8Z,11Z,14Z)/22:1(11Z))', 'PS(20:4(5Z,8Z,11Z,14Z)/22:0)', 'PS(22:0/20:4(5Z,8Z,11Z,14Z))', 'PS(22:1(11Z)/20:3(8Z,11Z,14Z))', 'PS(22:2(13Z,16Z)/20:2(11Z,14Z))', 'PS(22:4(7Z,10Z,13Z,16Z)/20:0)']
866.7	9099.71	0.977931	0.983488	C49H100NO7P	[M+Na-2H]-	866.698	1.45	['PC(O-19:0/22:0)', 'PC(O-20:0/21:0)']
867.559	15095.8	1.25974	0.742138	0
867.595	17764.7	1.26323	0.791258	0
868.532	14549.6	0.870946	0.720442	0
868.572	14205.1	1.39073	0.720442	0
868.608	20490.3	1.07118	0.801449	C46H84NO8P	[M+Hac-H]-	868.607	0.68	['PC(16:0/22:4(7Z,10Z,13Z,16Z))', 'PC(18:0/20:4(5Z,8Z,11Z,14Z))', 'PC(18:0/20:4(8Z,10Z,12Z,14Z))', 'PC(18:1(9Z)/20:3(5Z,8Z,11Z))', 'PC(18:1(9Z)/20:3(8Z,11Z,14Z))', 'PC(18:2(9Z,12Z)/20:2(11Z,14Z))', 'PC(18:3(6Z,9Z,12Z)/20:1(11Z))', 'PC(18:3(9Z,12Z,15Z)/20:1(11Z))', 'PC(18:4(6Z,9Z,12Z,15Z)/20:0)', 'PC(20:0/18:4(6Z,9Z,12Z,15Z))', 'PC(20:1(11Z)/18:3(6Z,9Z,12Z))', 'PC(20:1(11Z)/18:3(9Z,12Z,15Z))', 'PC…
868.608	20490.3	1.07118	0.801449	C48H88NO10P	[M-H]-	868.607	0.68	['PS(20:1(11Z)/22:2(13Z,16Z))', 'PS(20:2(11Z,14Z)/22:1(11Z))', 'PS(20:3(8Z,11Z,14Z)/22:0)', 'PS(22:0/20:3(8Z,11Z,14Z))', 'PS(22:1(11Z)/20:2(11Z,14Z))', 'PS(22:2(13Z,16Z)/20:1(11Z))']
869.52	11707.4	0.838684	0.956705	C46H79O13P	[M-H]-	869.519	1.1	['PI(15:1(9Z)/22:4(7Z,10Z,13Z,16Z))', 'PI(17:0/20:5(5Z,8Z,11Z,14Z,17Z))', 'PI(17:1(9Z)/20:4(5Z,8Z,11Z,14Z))', 'PI(17:2(9Z,12Z)/20:3(8Z,11Z,14Z))', 'PI(18:4(6Z,9Z,12Z,15Z)/19:1(9Z))', 'PI(19:1(9Z)/18:4(6Z,9Z,12Z,15Z))', 'PI(20:3(8Z,11Z,14Z)/17:2(9Z,12Z))', 'PI(20:4(5Z,8Z,11Z,14Z)/17:1(9Z))', 'PI(20:5(5Z,8Z,11Z,14Z,17Z)/17:0)', 'PI(22:4(7Z,10Z,13Z,16Z)/15:1(9Z))']
869.575	6743.63	1.12132	0.951168	C42H83O12P	[M+Hac-H]-	869.576	-1.54	['PI(O-16:0/17:0)', 'PI(O-18:0/15:0)', 'PI(O-20:0/13:0)']
869.611	10651.2	1.23389	0.801449	0
870.548	11446	0.971058	0.592718	0
870.587	12985.2	1.10065	0.912352	0
870.623	17201.3	1.14866	0.830956	C46H86NO8P	[M+Hac-H]-	870.623	0.32	['PC(16:1(9Z)/22:2(13Z,16Z))', 'PC(18:0/20:3(5Z,11Z,14Z))', 'PC(18:0/20:3(5Z,8Z,11Z))', 'PC(18:0/20:3(5Z,8Z,14Z))', 'PC(18:0/20:3(8Z,11Z,14Z))', 'PC(18:1(9Z)/20:2(11Z,14Z))', 'PC(18:2(9Z,12Z)/20:1(11Z))', 'PC(18:2(9Z,12Z)/20:1(13Z))', 'PC(18:3(6Z,9Z,12Z)/20:0)', 'PC(18:3(9Z,12Z,15Z)/20:0)', 'PC(20:0/18:3(6Z,9Z,12Z))', 'PC(20:0/18:3(9Z,12Z,15Z))', 'PC(20:1(11Z)/18:2(9Z,12Z))', 'PC(20:2(11Z,14Z)/18…
870.623	17201.3	1.14866	0.830956	C48H90NO10P	[M-H]-	870.623	0.32	['PS(20:0/22:2(13Z,16Z))', 'PS(20:1(11Z)/22:1(11Z))', 'PS(20:2(11Z,14Z)/22:0)', 'PS(22:0/20:2(11Z,14Z))', 'PS(22:1(11Z)/20:1(11Z))', 'PS(22:2(13Z,16Z)/20:0)']
871.591	6152.21	1.4065	0.730568	0
872.564	28940.7	0.963037	0.730251	0
872.639	8474.67	1.17255	0.801449	C46H88NO8P	[M+Hac-H]-	872.639	0.49	['PC(16:0/22:2(13Z,16Z))', 'PC(16:1(9Z)/22:1(11Z))', 'PC(17:2(9Z,12Z)/21:0)', 'PC(18:0/20:2(11Z,14Z))', 'PC(18:0/20:2(5Z,11Z))', 'PC(18:0/20:2(5Z,14Z))', 'PC(18:0/20:2(5Z,8Z))', 'PC(18:0/20:2(8Z,11Z))', 'PC(18:0/20:2(8Z,14Z))', 'PC(18:1(11Z)/20:1(13Z))', 'PC(18:1(9Z)/20:1(11Z))', 'PC(18:2(9Z,12Z)/20:0)', 'PC(19:1(9Z)/19:1(9Z))', 'PC(20:0/18:2(9Z,12Z))', 'PC(20:1(11Z)/18:1(9Z))', 'PC(20:2(11Z,14Z)…
872.639	8474.67	1.17255	0.801449	C48H92NO10P	[M-H]-	872.639	0.49	['PS(20:0/22:1(11Z))', 'PS(20:1(11Z)/22:0)', 'PS(22:0/20:1(11Z))', 'PS(22:1(11Z)/20:0)']
873.566	15484.1	0.962165	0.720442	C50H83O10P	[M-H]-	873.565	1.35	['PG(22:2(13Z,16Z)/22:6(4Z,7Z,10Z,13Z,16Z,19Z))', 'PG(22:4(7Z,10Z,13Z,16Z)/22:4(7Z,10Z,13Z,16Z))', 'PG(22:6(4Z,7Z,10Z,13Z,16Z,19Z)/22:2(13Z,16Z))']
873.642	4894.09	1.38061	0.652474	0
873.706	7735.31	1.04341	0.801449	C47H95N2O6P	[M+Hac-H]-	873.707	-0.38	['SM(d18:0/24:1(15Z))', 'SM(d18:1/24:0)']
874.483	6707.07	1.11505	0.801449	0
874.581	9179.78	1.06587	0.730529	C44H82NO10P	[M+Hac-H]-	874.581	-0.49	['PS(16:0/22:2(13Z,16Z))', 'PS(16:1(9Z)/22:1(11Z))', 'PS(17:2(9Z,12Z)/21:0)', 'PS(18:0/20:2(11Z,14Z))', 'PS(18:1(9Z)/20:1(11Z))', 'PS(18:2(9Z,12Z)/20:0)', 'PS(19:1(9Z)/19:1(9Z))', 'PS(20:0/18:2(9Z,12Z))', 'PS(20:1(11Z)/18:1(9Z))', 'PS(20:2(11Z,14Z)/18:0)', 'PS(21:0/17:2(9Z,12Z))', 'PS(22:1(11Z)/16:1(9Z))', 'PS(22:2(13Z,16Z)/16:0)']
874.655	7738.72	1.10582	0.948232	C50H95NO8	[M+K-2H]-	874.654	0.27	['GalCer(d18:1/26:1(17Z))', 'GlcCer(d18:1/26:1(17Z))']
874.655	7738.72	1.10582	0.948232	C46H90NO8P	[M+Hac-H]-	874.654	0.4	['PC(14:0/24:1(15Z))', 'PC(16:0/22:1(11Z))', 'PC(16:0/22:1(13Z))', 'PC(16:1(9Z)/22:0)', 'PC(17:1(9Z)/21:0)', 'PC(18:0/20:1(11Z))', 'PC(18:0/20:1(13Z))', 'PC(18:0/20:1(14Z))', 'PC(18:0/20:1(5Z))', 'PC(18:0/20:1(8Z))', 'PC(18:1(9E)/20:0)', 'PC(18:1(9Z)/20:0)', 'PC(19:0/19:1(9Z))', 'PC(19:1(9Z)/19:0)', 'PC(20:0/18:1(11Z))', 'PC(20:0/18:1(6Z))', 'PC(20:0/18:1(7Z))', 'PC(20:0/18:1(9Z))', 'PC(20:1(11Z)…
874.655	7738.72	1.10582	0.948232	C48H94NO10P	[M-H]-	874.654	0.4	['PS(20:0/22:0)', 'PS(21:0/21:0)', 'PS(22:0/20:0)']
875.657	3963.03	1.18538	0.9309	C49H97O8PS	[M-H]-	875.657	0.59	['NA']
876.499	15251.5	0.964647	0.791258	0
876.574	5320.52	1.27966	0.801449	C47H80NO8P	[M+Hac-H]-	876.576	-1.79	['PC(17:1(9Z)/22:6(4Z,7Z,10Z,13Z,16Z,19Z))', 'PC(22:6(4Z,7Z,10Z,13Z,16Z,19Z)/17:1(9Z))', 'PE(20:1(11Z)/22:6(4Z,7Z,10Z,13Z,16Z,19Z))', 'PE(20:3(8Z,11Z,14Z)/22:4(7Z,10Z,13Z,16Z))', 'PE(20:5(5Z,8Z,11Z,14Z,17Z)/22:2(13Z,16Z))', 'PE(22:2(13Z,16Z)/20:5(5Z,8Z,11Z,14Z,17Z))', 'PE(22:4(7Z,10Z,13Z,16Z)/20:3(8Z,11Z,14Z))', 'PE(22:6(4Z,7Z,10Z,13Z,16Z,19Z)/20:1(11Z))']
876.574	5320.52	1.27966	0.801449	C47H86NO10P	[M+Na-2H]-	876.574	0.95	['PS(19:1(9Z)/22:2(13Z,16Z))', 'PS(20:3(8Z,11Z,14Z)/21:0)', 'PS(21:0/20:3(8Z,11Z,14Z))', 'PS(22:2(13Z,16Z)/19:1(9Z))']
876.574	5320.52	1.27966	0.801449	C49H84NO10P	[M-H]-	876.576	-1.79	['PS(21:0/22:6(4Z,7Z,10Z,13Z,16Z,19Z))', 'PS(22:6(4Z,7Z,10Z,13Z,16Z,19Z)/21:0)']
877.838	13275.8	0.559016	0.720442	0
878.515	5173.19	0.982395	0.791258	0
878.841	8102.8	0.637067	0.746687	0
880.506	11208	1.18171	0.912352	0
880.57	7934.57	0.954361	0.951168	C46H80NO9P	[M+Hac-H]-	880.571	-0.98	['PS(O-18:0/22:6(4Z,7Z,10Z,13Z,16Z,19Z))', 'PS(P-20:0/20:5(5Z,8Z,11Z,14Z,17Z))']
882.522	64501.6	1.07318	0.791258	0
882.547	28282.2	0.968772	0.730251	0
882.623	2945.58	1.149	0.976648	C47H86NO8P	[M+Hac-H]-	882.623	-0.05	['PC(17:0/22:4(7Z,10Z,13Z,16Z))', 'PC(17:2(9Z,12Z)/22:2(13Z,16Z))', 'PC(18:4(6Z,9Z,12Z,15Z)/21:0)', 'PC(19:0/20:4(5Z,8Z,11Z,14Z))', 'PC(19:1(9Z)/20:3(8Z,11Z,14Z))', 'PC(20:3(8Z,11Z,14Z)/19:1(9Z))', 'PC(20:4(5Z,8Z,11Z,14Z)/19:0)', 'PC(21:0/18:4(6Z,9Z,12Z,15Z))', 'PC(22:2(13Z,16Z)/17:2(9Z,12Z))', 'PC(22:4(7Z,10Z,13Z,16Z)/17:0)', 'PE(20:0/22:4(7Z,10Z,13Z,16Z))', 'PE(20:2(11Z,14Z)/22:2(13Z,16Z))', 'P…
883.514	6442.45	1.05454	0.81818	0
884.563	12369.1	0.978063	0.817102	0
886.483	11118.6	1.06443	0.801449	0
886.554	36660.1	0.995919	0.791258	C48H84NO9P	[M+(37Cl)]-	886.555	-1.38	['PS(O-20:0/22:6(4Z,7Z,10Z,13Z,16Z,19Z))']
886.578	13960.5	0.962154	0.76838	0
886.654	4083.93	1.47626	0.773821	C47H90NO8P	[M+Hac-H]-	886.654	-0.12	['PC(17:0/22:2(13Z,16Z))', 'PC(17:1(9Z)/22:1(11Z))', 'PC(17:2(9Z,12Z)/22:0)', 'PC(18:2(9Z,12Z)/21:0)', 'PC(19:0/20:2(11Z,14Z))', 'PC(19:1(9Z)/20:1(11Z))', 'PC(20:1(11Z)/19:1(9Z))', 'PC(20:2(11Z,14Z)/19:0)', 'PC(21:0/18:2(9Z,12Z))', 'PC(22:0/17:2(9Z,12Z))', 'PC(22:1(11Z)/17:1(9Z))', 'PC(22:2(13Z,16Z)/17:0)', 'PE(20:0/22:2(13Z,16Z))', 'PE(20:1(11Z)/22:1(11Z))', 'PE(20:2(11Z,14Z)/22:0)', 'PE(22:0/20…
886.654	4083.93	1.47626	0.773821	C49H94NO10P	[M-H]-	886.654	-0.12	['PS(21:0/22:1(11Z))', 'PS(22:1(11Z)/21:0)']
888.499	19529.9	0.962917	0.801449	0
888.67	8163.04	1.13785	0.861062	C47H92NO8P	[M+Hac-H]-	888.67	-0.33	['PC(17:0/22:1(11Z))', 'PC(17:1(9Z)/22:0)', 'PC(18:1(9Z)/21:0)', 'PC(19:0/20:1(11Z))', 'PC(19:1(9Z)/20:0)', 'PC(20:0/19:1(9Z))', 'PC(20:1(11Z)/19:0)', 'PC(21:0/18:1(9Z))', 'PC(22:0/17:1(9Z))', 'PC(22:1(11Z)/17:0)', 'PE(18:0/24:1(15Z))', 'PE(20:0/22:1(11Z))', 'PE(20:0/22:1(13Z))', 'PE(20:1(11Z)/22:0)', 'PE(22:0/20:1(11Z))', 'PE(22:1(11Z)/20:0)', 'PE(24:0/18:1(9Z))']
888.67	8163.04	1.13785	0.861062	C49H96NO10P	[M-H]-	888.67	-0.33	['PS(21:0/22:0)', 'PS(22:0/21:0)']
889.581	13657.2	1.13036	0.801449	C47H87O13P	[M-H]-	889.581	0.3	['PI(16:0/22:2(13Z,16Z))', 'PI(16:1(9Z)/22:1(11Z))', 'PI(17:2(9Z,12Z)/21:0)', 'PI(18:0/20:2(11Z,14Z))', 'PI(18:1(9Z)/20:1(11Z))', 'PI(18:2(9Z,12Z)/20:0)', 'PI(19:1(9Z)/19:1(9Z))', 'PI(20:0/18:2(9Z,12Z))', 'PI(20:1(11Z)/18:1(9Z))', 'PI(20:2(11Z,14Z)/18:0)', 'PI(21:0/17:2(9Z,12Z))', 'PI(22:1(11Z)/16:1(9Z))', 'PI(22:2(13Z,16Z)/16:0)']
890.517	13818.5	0.996904	0.791258	0
891.519	7406.43	1.07705	0.811243	0
892.465	5559.21	1.13306	0.902414	0
892.569	5502.54	1.45916	0.791258	0
892.607	9068.18	1.33707	0.817102	C48H84NO8P	[M+Hac-H]-	892.607	-0.66	['PC(18:0/22:6(4Z,7Z,10Z,13Z,16Z,19Z))', 'PC(18:0/22:6(9Z,11Z,13Z,15Z,17Z,19))', 'PC(18:1(11Z)/22:5(7Z,10Z,13Z,16Z,19Z))', 'PC(18:2(9Z,12Z)/22:4(7Z,10Z,13Z,16Z))', 'PC(18:4(6Z,9Z,12Z,15Z)/22:2(13Z,16Z))', 'PC(20:1(11Z)/20:5(5Z,8Z,11Z,14Z,17Z))', 'PC(20:2(11Z,14Z)/20:4(5Z,8Z,11Z,14Z))', 'PC(20:3(8Z,11Z,14Z)/20:3(8Z,11Z,14Z))', 'PC(20:4(5Z,8Z,11Z,14Z)/20:2(11Z,14Z))', 'PC(20:5(5Z,8Z,11Z,14Z,17Z)/20…
892.607	9068.18	1.33707	0.817102	C50H88NO10P	[M-H]-	892.607	-0.66	['PS(22:1(11Z)/22:4(7Z,10Z,13Z,16Z))', 'PS(22:4(7Z,10Z,13Z,16Z)/22:1(11Z))']
893.535	6206.4	1.08491	0.76838	0
894.548	24972.4	0.984674	0.749274	0
894.623	9127.2	1.1194	0.902414	C48H86NO8P	[M+Hac-H]-	894.623	0.31	['PC(18:0/22:5(4Z,7Z,10Z,13Z,16Z))', 'PC(18:0/22:5(7Z,10Z,13Z,16Z,19Z))', 'PC(18:1(9Z)/22:4(7Z,10Z,13Z,16Z))', 'PC(18:3(6Z,9Z,12Z)/22:2(13Z,16Z))', 'PC(18:3(9Z,12Z,15Z)/22:2(13Z,16Z))', 'PC(18:4(6Z,9Z,12Z,15Z)/22:1(11Z))', 'PC(20:0/20:5(5Z,8Z,11Z,14Z,17Z))', 'PC(20:1(11Z)/20:4(5Z,8Z,11Z,14Z))', 'PC(20:2(11Z,14Z)/20:3(8Z,11Z,14Z))', 'PC(20:3(8Z,11Z,14Z)/20:2(11Z,14Z))', 'PC(20:4(5Z,8Z,11Z,14Z)/20:…
894.623	9127.2	1.1194	0.902414	C50H90NO10P	[M-H]-	894.623	0.31	['PS(22:0/22:4(7Z,10Z,13Z,16Z))', 'PS(22:2(13Z,16Z)/22:2(13Z,16Z))', 'PS(22:4(7Z,10Z,13Z,16Z)/22:0)']
895.591	2367.65	1.54277	0.802357	C44H85O12P	[M+Hac-H]-	895.592	-1.17	['PI(O-16:0/19:1(9Z))', 'PI(O-18:0/17:1(9Z))', 'PI(O-20:0/15:1(9Z))', 'PI(P-16:0/19:0)', 'PI(P-18:0/17:0)', 'PI(P-20:0/15:0)']
895.627	3024.18	0.616334	0.801449	0
896.498	11874.2	1.01687	0.791258	0
896.563	91742.3	0.939499	0.749274	0
896.638	10293.9	1.11867	0.81818	C48H88NO8P	[M+Hac-H]-	896.639	-0.32	['PC(18:0/22:4(7Z,10Z,13Z,16Z))', 'PC(18:2(9Z,12Z)/22:2(13Z,16Z))', 'PC(18:3(6Z,9Z,12Z)/22:1(11Z))', 'PC(18:3(9Z,12Z,15Z)/22:1(11Z))', 'PC(18:4(6Z,9Z,12Z,15Z)/22:0)', 'PC(20:0/20:4(5Z,8Z,11Z,14Z))', 'PC(20:1(11Z)/20:3(8Z,11Z,14Z))', 'PC(20:2(11E,14E)/20:2(11E,14E))', 'PC(20:2(11Z,14Z)/20:2(11Z,14Z))', 'PC(20:3(8Z,11Z,14Z)/20:1(11Z))', 'PC(20:4(5Z,8Z,11Z,14Z)/20:0)', 'PC(22:0/18:4(6Z,9Z,12Z,15Z))'…
896.638	10293.9	1.11867	0.81818	C50H92NO10P	[M-H]-	896.639	-0.32	['PS(22:1(11Z)/22:2(13Z,16Z))', 'PS(22:2(13Z,16Z)/22:1(11Z))']
897.567	44362.5	0.952213	0.791258	0
898.483	22966.9	0.966111	0.801449	0
898.58	34208.6	0.953801	0.76838	C46H82NO10P	[M+Hac-H]-	898.581	-1.53	['PS(18:0/22:4(7Z,10Z,13Z,16Z))', 'PS(18:2(9Z,12Z)/22:2(13Z,16Z))', 'PS(18:3(6Z,9Z,12Z)/22:1(11Z))', 'PS(18:3(9Z,12Z,15Z)/22:1(11Z))', 'PS(18:4(6Z,9Z,12Z,15Z)/22:0)', 'PS(20:0/20:4(5Z,8Z,11Z,14Z))', 'PS(20:1(11Z)/20:3(8Z,11Z,14Z))', 'PS(20:2(11Z,14Z)/20:2(11Z,14Z))', 'PS(20:3(8Z,11Z,14Z)/20:1(11Z))', 'PS(20:4(5Z,8Z,11Z,14Z)/20:0)', 'PS(22:0/18:4(6Z,9Z,12Z,15Z))', 'PS(22:1(11Z)/18:3(6Z,9Z,12Z))', …
898.654	16990.7	0.923772	0.883911	C48H90NO8P	[M+Hac-H]-	898.654	-0.05	['PC(18:0/22:3(10Z,13Z,16Z))', 'PC(18:1(9Z)/22:2(13Z,16Z))', 'PC(18:2(9Z,12Z)/22:1(11Z))', 'PC(18:3(6Z,9Z,12Z)/22:0)', 'PC(18:3(9Z,12Z,15Z)/22:0)', 'PC(20:0/20:3(11Z,14Z,17Z))', 'PC(20:0/20:3(8Z,11Z,14Z))', 'PC(20:1(11Z)/20:2(11Z,14Z))', 'PC(20:2(11Z,14Z)/20:1(11Z))', 'PC(20:3(8Z,11Z,14Z)/20:0)', 'PC(22:0/18:3(6Z,9Z,12Z))', 'PC(22:0/18:3(9Z,12Z,15Z))', 'PC(22:1(11Z)/18:2(9Z,12Z))', 'PC(22:2(13Z,1…
898.654	16990.7	0.923772	0.883911	C50H94NO10P	[M-H]-	898.654	-0.05	['PS(22:0/22:2(13Z,16Z))', 'PS(22:1(11Z)/22:1(11Z))', 'PS(22:2(13Z,16Z)/22:0)']
899.486	11271.3	0.972778	0.830956	0
899.583	20164.7	0.979939	0.720442	0
900.499	25648	0.994242	0.791258	0
900.595	31880.5	0.908989	0.730529	0
901.502	13305	1.00429	0.801449	C47H79O12P	[M+Cl]-	901.5	1.66	['PI(P-16:0/22:6(4Z,7Z,10Z,13Z,16Z,19Z))']
901.598	17398.6	0.941399	0.76838	0
901.838	11663.1	0.741995	0.791258	0
902.514	41516.4	0.968789	0.798381	0
902.687	5398.15	1.14875	0.801449	C48H94NO8P	[M+Hac-H]-	902.686	1.15	['PC(16:0/24:1(15Z))', 'PC(18:0/22:1(11Z))', 'PC(18:0/22:1(13Z))', 'PC(18:1(11E)/22:0)', 'PC(18:1(11Z)/22:0)', 'PC(18:1(9Z)/22:0)', 'PC(19:1(9Z)/21:0)', 'PC(20:0/20:1(11Z))', 'PC(20:0/20:1(13Z))', 'PC(20:0/20:1(5Z))', 'PC(20:0/20:1(8Z))', 'PC(20:1(11Z)/20:0)', 'PC(21:0/19:1(9Z))', 'PC(22:0/18:1(11Z))', 'PC(22:0/18:1(12Z))', 'PC(22:0/18:1(13Z))', 'PC(22:0/18:1(6Z))', 'PC(22:0/18:1(7Z))', 'PC(22:0/…
902.687	5398.15	1.14875	0.801449	C50H98NO10P	[M-H]-	902.686	1.15	['PS(22:0/22:0)']
902.841	6335.95	1.08355	0.720442	0
903.517	24253.3	0.99426	0.801449	C47H81O12P	[M+Cl]-	903.516	0.89	['PI(O-16:0/22:6(4Z,7Z,10Z,13Z,16Z,19Z))', 'PI(P-18:0/20:5(5Z,8Z,11Z,14Z,17Z))']
904.531	28676.1	0.993438	0.801449	0
905.534	15008.6	1.10305	0.796789	0
905.869	18690.5	0.722245	0.791258	0
906.622	6293.07	0.915127	0.830956	C49H86NO8P	[M+Hac-H]-	906.623	-0.55	['PC(19:0/22:6(4Z,7Z,10Z,13Z,16Z,19Z))', 'PC(22:6(4Z,7Z,10Z,13Z,16Z,19Z)/19:0)', 'PE(22:0/22:6(4Z,7Z,10Z,13Z,16Z,19Z))', 'PE(22:2(13Z,16Z)/22:4(7Z,10Z,13Z,16Z))', 'PE(22:4(7Z,10Z,13Z,16Z)/22:2(13Z,16Z))', 'PE(22:6(4Z,7Z,10Z,13Z,16Z,19Z)/22:0)']
906.872	11824	0.70737	0.791258	0
907.626	2748.65	0.918225	0.98154	0
909.567	10191.2	1.08216	0.791258	0
910.58	11729.1	1.1021	0.791258	C47H82NO10P	[M+Hac-H]-	910.581	-1.94	['PS(19:1(9Z)/22:4(7Z,10Z,13Z,16Z))', 'PS(20:5(5Z,8Z,11Z,14Z,17Z)/21:0)', 'PS(21:0/20:5(5Z,8Z,11Z,14Z,17Z))', 'PS(22:4(7Z,10Z,13Z,16Z)/19:1(9Z))']
910.654	7002.39	1.15226	0.915356	C49H90NO8P	[M+Hac-H]-	910.654	-0.62	['PC(19:0/22:4(7Z,10Z,13Z,16Z))', 'PC(20:4(5Z,8Z,11Z,14Z)/21:0)', 'PC(21:0/20:4(5Z,8Z,11Z,14Z))', 'PC(22:4(7Z,10Z,13Z,16Z)/19:0)', 'PE(22:0/22:4(7Z,10Z,13Z,16Z))', 'PE(22:2(13Z,16Z)/22:2(13Z,16Z))', 'PE(22:4(7Z,10Z,13Z,16Z)/22:0)']
912.67	20426.8	1.17583	0.830956	C49H92NO8P	[M+Hac-H]-	912.67	-0.17	['PC(19:1(9Z)/22:2(13Z,16Z))', 'PC(20:3(8Z,11Z,14Z)/21:0)', 'PC(21:0/20:3(8Z,11Z,14Z))', 'PC(22:2(13Z,16Z)/19:1(9Z))', 'PE(22:1(11Z)/22:2(13Z,16Z))', 'PE(22:2(13Z,16Z)/22:1(11Z))']
913.675	9991.43	1.1864	0.836142	0
914.687	7785.15	1.12898	0.860466	C49H94NO8P	[M+Hac-H]-	914.686	1.19	['PC(19:0/22:2(13Z,16Z))', 'PC(19:1(9Z)/22:1(11Z))', 'PC(20:2(11Z,14Z)/21:0)', 'PC(21:0/20:2(11Z,14Z))', 'PC(22:1(11Z)/19:1(9Z))', 'PC(22:2(13Z,16Z)/19:0)', 'PE(22:0/22:2(13Z,16Z))', 'PE(22:1(11Z)/22:1(11Z))', 'PE(22:2(13Z,16Z)/22:0)']
916.701	7856.77	0.892109	0.836142	C49H96NO8P	[M+Hac-H]-	916.701	-0.13	['PC(19:0/22:1(11Z))', 'PC(19:1(9Z)/22:0)', 'PC(20:1(11Z)/21:0)', 'PC(21:0/20:1(11Z))', 'PC(22:0/19:1(9Z))', 'PC(22:1(11Z)/19:0)', 'PE(20:0/24:1(15Z))', 'PE(22:0/22:1(11Z))', 'PE(22:0/22:1(13Z))', 'PE(22:1(11Z)/22:0)', 'PE(24:0/20:1(11Z))']
918.547	46907.5	0.945311	0.76838	0
919.551	23414.3	0.970284	0.76838	C56H82O6S	[M+(37Cl)]-	919.55	1.18	['Sulfated Dihydromenaquinone-9']
920.564	41196.6	0.9527	0.76838	0
920.638	8055.49	1.07098	0.854941	C50H88NO8P	[M+Hac-H]-	920.639	-0.44	['PC(20:0/22:6(4Z,7Z,10Z,13Z,16Z,19Z))', 'PC(20:2(11Z,14Z)/22:4(7Z,10Z,13Z,16Z))', 'PC(20:4(5Z,8Z,11Z,14Z)/22:2(13Z,16Z))', 'PC(20:5(5Z,8Z,11Z,14Z,17Z)/22:1(11Z))', 'PC(22:1(11Z)/20:5(5Z,8Z,11Z,14Z,17Z))', 'PC(22:2(13Z,16Z)/20:4(5Z,8Z,11Z,14Z))', 'PC(22:4(7Z,10Z,13Z,16Z)/20:2(11Z,14Z))', 'PC(22:6(4Z,7Z,10Z,13Z,16Z,19Z)/20:0)']
921.567	19823.8	0.963033	0.791258	0
922.579	31443.6	0.89944	0.76838	0
923.582	11551.4	0.872507	0.791258	C46H95O11PS	[M+K-2H]-	923.582	0.14	['PGS']
924.595	5889.8	0.797867	0.801449	C48H84NO10P	[M+Hac-H]-	924.597	-1.8	['PS(20:1(11Z)/22:4(7Z,10Z,13Z,16Z))', 'PS(20:3(8Z,11Z,14Z)/22:2(13Z,16Z))', 'PS(20:4(5Z,8Z,11Z,14Z)/22:1(11Z))', 'PS(20:5(5Z,8Z,11Z,14Z,17Z)/22:0)', 'PS(22:0/20:5(5Z,8Z,11Z,14Z,17Z))', 'PS(22:1(11Z)/20:4(5Z,8Z,11Z,14Z))', 'PS(22:2(13Z,16Z)/20:3(8Z,11Z,14Z))', 'PS(22:4(7Z,10Z,13Z,16Z)/20:1(11Z))']
924.67	5582.61	0.948694	0.843346	C50H92NO8P	[M+Hac-H]-	924.67	-0.14	['PC(20:0/22:4(7Z,10Z,13Z,16Z))', 'PC(20:2(11Z,14Z)/22:2(13Z,16Z))', 'PC(20:3(8Z,11Z,14Z)/22:1(11Z))', 'PC(20:4(5Z,8Z,11Z,14Z)/22:0)', 'PC(22:0/20:4(5Z,8Z,11Z,14Z))', 'PC(22:1(11Z)/20:3(8Z,11Z,14Z))', 'PC(22:2(13Z,16Z)/20:2(11Z,14Z))', 'PC(22:4(7Z,10Z,13Z,16Z)/20:0)']
925.579	2738.69	0.53376	0.801449	C48H89O13P	[M+Na-2H]-	925.579	0.52	['PI(17:0/22:2(13Z,16Z))', 'PI(17:1(9Z)/22:1(11Z))', 'PI(17:2(9Z,12Z)/22:0)', 'PI(18:2(9Z,12Z)/21:0)', 'PI(19:0/20:2(11Z,14Z))', 'PI(19:1(9Z)/20:1(11Z))', 'PI(20:1(11Z)/19:1(9Z))', 'PI(20:2(11Z,14Z)/19:0)', 'PI(21:0/18:2(9Z,12Z))', 'PI(22:0/17:2(9Z,12Z))', 'PI(22:1(11Z)/17:1(9Z))', 'PI(22:2(13Z,16Z)/17:0)']
925.6	13738.4	0.9388	0.76838	0
925.838	5317.64	0.815162	0.801449	0
926.514	5728.19	1.05833	0.791258	0
926.613	8161.2	0.930833	0.720442	C48H86NO10P	[M+Hac-H]-	926.613	-0.17	['PS(20:0/22:4(7Z,10Z,13Z,16Z))', 'PS(20:2(11Z,14Z)/22:2(13Z,16Z))', 'PS(20:3(8Z,11Z,14Z)/22:1(11Z))', 'PS(20:4(5Z,8Z,11Z,14Z)/22:0)', 'PS(22:0/20:4(5Z,8Z,11Z,14Z))', 'PS(22:1(11Z)/20:3(8Z,11Z,14Z))', 'PS(22:2(13Z,16Z)/20:2(11Z,14Z))', 'PS(22:4(7Z,10Z,13Z,16Z)/20:0)']
926.686	9883.02	1.06939	0.950334	C50H94NO8P	[M+Hac-H]-	926.686	0.29	['PC(20:1(11Z)/22:2(13Z,16Z))', 'PC(20:2(11Z,14Z)/22:1(11Z))', 'PC(20:3(8Z,11Z,14Z)/22:0)', 'PC(22:0/20:3(8Z,11Z,14Z))', 'PC(22:1(11Z)/20:2(11Z,14Z))', 'PC(22:2(13Z,16Z)/20:1(11Z))']
926.841	3732.13	0.828918	0.81818	0
927.615	4157.33	1.00423	0.791258	0
929.769	20348.4	1.14292	0.951106	0
929.869	15491.8	0.830574	0.81818	0
930.717	2212.01	1.35301	0.819226	C50H98NO8P	[M+Hac-H]-	930.717	0.58	['PC(18:0/24:1(15Z))', 'PC(18:1(9Z)/24:0)', 'PC(20:0/22:1(11Z))', 'PC(20:0/22:1(13Z))', 'PC(20:1(11Z)/22:0)', 'PC(20:1(13E)/22:0)', 'PC(20:1(13Z)/22:0)', 'PC(22:0/20:1(11Z))', 'PC(22:1(11Z)/20:0)', 'PC(24:0/18:1(6Z))', 'PC(24:0/18:1(9Z))']
930.772	12016.1	1.22118	0.843346	0
930.873	10715.3	0.832723	0.801449	0
931.775	2782.83	1.36036	0.830956	C59H106O6	[M+Na-2H]-	931.774	1.29	['TG(12:0/22:0/22:4(7Z,10Z,13Z,16Z))[iso6]', 'TG(12:0/22:1(11Z)/22:3(10Z,13Z,16Z))[iso6]', 'TG(12:0/22:2(13Z,16Z)/22:2(13Z,16Z))[iso3]', 'TG(13:0/21:0/22:4(7Z,10Z,13Z,16Z))[iso6]', 'TG(14:0/20:0/22:4(7Z,10Z,13Z,16Z))[iso6]', 'TG(14:0/20:1(11Z)/22:3(10Z,13Z,16Z))[iso6]', 'TG(14:0/20:2(11Z,14Z)/22:2(13Z,16Z))[iso6]', 'TG(14:0/20:3(8Z,11Z,14Z)/22:1(11Z))[iso6]', 'TG(14:0/20:4(5Z,8Z,11Z,14Z)/22:0)[is…
931.775	2782.83	1.36036	0.830956	C61H104O6	[M-H]-	931.776	-1.29	['TG(14:0/22:1(11Z)/22:6(4Z,7Z,10Z,13Z,16Z,19Z))[iso6]', 'TG(14:0/22:2(13Z,16Z)/22:5(7Z,10Z,13Z,16Z,19Z))[iso6]', 'TG(14:0/22:3(10Z,13Z,16Z)/22:4(7Z,10Z,13Z,16Z))[iso6]', 'TG(14:1(9Z)/22:0/22:6(4Z,7Z,10Z,13Z,16Z,19Z))[iso6]', 'TG(14:1(9Z)/22:1(11Z)/22:5(7Z,10Z,13Z,16Z,19Z))[iso6]', 'TG(14:1(9Z)/22:2(13Z,16Z)/22:4(7Z,10Z,13Z,16Z))[iso6]', 'TG(14:1(9Z)/22:3(10Z,13Z,16Z)/22:3(10Z,13Z,16Z))[iso3]', '…
932.563	3240.32	0.921299	0.720442	0
933.901	10753.4	0.790257	0.830956	0
934.654	12162.7	1.10872	0.852907	C51H90NO8P	[M+Hac-H]-	934.654	-0.02	['PC(21:0/22:6(4Z,7Z,10Z,13Z,16Z,19Z))', 'PC(22:6(4Z,7Z,10Z,13Z,16Z,19Z)/21:0)']
934.904	6175.06	1.0604	0.929202	0
935.658	6700.78	1.28249	0.801449	C50H97O13P	[M-H]-	935.659	-1.73	['PI(19:0/22:0)', 'PI(20:0/21:0)', 'PI(21:0/20:0)', 'PI(22:0/19:0)']
935.658	6700.78	1.28249	0.801449	C48H93O11P	[M+Hac-H]-	935.659	-1.73	['SLBPA(42:0)']
936.671	12316.9	1.14232	0.814767	0
937.674	7466.74	1.24565	0.791258	0
938.686	13535.1	1.09916	0.912352	C51H94NO8P	[M+Hac-H]-	938.686	0.77	['PC(21:0/22:4(7Z,10Z,13Z,16Z))', 'PC(22:4(7Z,10Z,13Z,16Z)/21:0)']
939.523	3967.89	0.78915	0.862206	C47H77O13P	[M+Hac-H]-	939.524	-1.05	['PI(16:1(9Z)/22:6(4Z,7Z,10Z,13Z,16Z,19Z))', 'PI(18:2(9Z,12Z)/20:5(5Z,8Z,11Z,14Z,17Z))', 'PI(18:3(6Z,9Z,12Z)/20:4(5Z,8Z,11Z,14Z))', 'PI(18:3(9Z,12Z,15Z)/20:4(5Z,8Z,11Z,14Z))', 'PI(18:4(6Z,9Z,12Z,15Z)/20:3(8Z,11Z,14Z))', 'PI(20:3(8Z,11Z,14Z)/18:4(6Z,9Z,12Z,15Z))', 'PI(20:4(5Z,8Z,11Z,14Z)/18:3(6Z,9Z,12Z))', 'PI(20:4(5Z,8Z,11Z,14Z)/18:3(9Z,12Z,15Z))', 'PI(20:5(5Z,8Z,11Z,14Z,17Z)/18:2(9Z,12Z))', 'PI(…
939.69	8184.12	1.15627	0.81818	0
940.703	7858.06	1.00608	0.999467	0
943.649	23980.2	0.992001	0.998079	0
943.785	14129.7	1.13307	0.951168	0
944.653	15125.2	0.952878	0.953489	0
944.788	8300.49	1.22833	0.836222	0
946.58	5672.14	0.991337	0.936016	C50H82NO10P	[M+Hac-H]-	946.581	-1.53	['PS(22:2(13Z,16Z)/22:6(4Z,7Z,10Z,13Z,16Z,19Z))', 'PS(22:4(7Z,10Z,13Z,16Z)/22:4(7Z,10Z,13Z,16Z))', 'PS(22:6(4Z,7Z,10Z,13Z,16Z,19Z)/22:2(13Z,16Z))']
948.596	3799.98	1.32971	0.720442	C50H84NO10P	[M+Hac-H]-	948.597	-1.66	['PS(22:1(11Z)/22:6(4Z,7Z,10Z,13Z,16Z,19Z))', 'PS(22:6(4Z,7Z,10Z,13Z,16Z,19Z)/22:1(11Z))']
950.536	6899.02	0.951889	0.836142	0
950.687	2994.01	1.23381	0.801449	C52H94NO8P	[M+Hac-H]-	950.686	1.07	['PC(22:1(11Z)/22:4(7Z,10Z,13Z,16Z))', 'PC(22:4(7Z,10Z,13Z,16Z)/22:1(11Z))']
951.471	3954.2	1.1512	0.903658	0
952.553	4778.84	1.16423	0.801449	0
953.87	8404.87	0.925583	0.835476	0
954.567	13994.4	0.928353	0.76838	0
954.717	4755.49	1.43062	0.801449	C52H98NO8P	[M+Hac-H]-	954.717	0.58	['PC(22:1(11Z)/22:2(13Z,16Z))', 'PC(22:2(13Z,16Z)/22:1(11Z))']
954.873	5972.27	0.909753	0.840811	0
955.57	6790.99	1.00477	0.801449	C49H91O13P	[M+K-2H]-	955.568	1.99	['PI(18:0/22:2(13Z,16Z))', 'PI(18:1(9Z)/22:1(11Z))', 'PI(18:2(9Z,12Z)/22:0)', 'PI(20:0/20:2(11Z,14Z))', 'PI(20:1(11Z)/20:1(11Z))', 'PI(20:2(11Z,14Z)/20:0)', 'PI(22:0/18:2(9Z,12Z))', 'PI(22:1(11Z)/18:1(9Z))', 'PI(22:2(13Z,16Z)/18:0)']
955.785	3289.61	1.39297	0.801449	0
956.487	6629.5	0.97592	0.801449	0
956.734	1635.28	1.57839	0.76838	C52H100NO8P	[M+Hac-H]-	956.733	1.55	['PC(22:0/22:2(13Z,16Z))', 'PC(22:1(11Z)/22:1(11Z))', 'PC(22:1(13E)/22:1(13E))', 'PC(22:1(13Z)/22:1(13Z))', 'PC(22:2(13Z,16Z)/22:0)']
957.902	9809.71	0.91758	0.921139	0
958.75	7326.98	1.1341	0.951168	0
959.508	5099.56	0.980853	0.801449	0
959.807	12335.2	1.17723	0.917875	C63H108O6	[M-H]-	959.807	0.03	['TG(16:0/22:1(11Z)/22:6(4Z,7Z,10Z,13Z,16Z,19Z))[iso6]', 'TG(16:0/22:1(13Z)/22:6(4Z,7Z,10Z,13Z,16Z,19Z))[iso6]', 'TG(16:0/22:2(13Z,16Z)/22:5(7Z,10Z,13Z,16Z,19Z))[iso6]', 'TG(16:0/22:3(10Z,13Z,16Z)/22:4(7Z,10Z,13Z,16Z))[iso6]', 'TG(16:1(9Z)/22:0/22:6(4Z,7Z,10Z,13Z,16Z,19Z))[iso6]', 'TG(16:1(9Z)/22:1(11Z)/22:5(7Z,10Z,13Z,16Z,19Z))[iso6]', 'TG(16:1(9Z)/22:1(13Z)/22:5(7Z,10Z,13Z,16Z,19Z))[iso6]', 'TG…
960.521	4306.37	0.915176	0.927881	0
964.552	17905.7	0.942031	0.801449	0
965.557	7841.92	1.07704	0.81818	0
965.594	10915.4	1.26953	0.935824	0
966.472	7344.96	1.04241	0.801449	0
967.476	3296.78	1.02959	0.909213	C51H79O13P	[M+K-2H]-	967.474	1.24	['PI(20:4(5Z,8Z,11Z,14Z)/22:6(4Z,7Z,10Z,13Z,16Z,19Z))', 'PI(22:6(4Z,7Z,10Z,13Z,16Z,19Z)/20:4(5Z,8Z,11Z,14Z))']
968.487	9511.17	0.957524	0.830956	0
968.584	8537.62	0.911152	0.791258	0
970.503	16694.2	0.964623	0.830956	0
972.765	9409.74	1.11056	0.966401	0
972.821	14798.2	1.15316	0.910059	0
973.769	6034.1	1.16033	0.926422	0
973.823	3826.35	1.35675	0.805733	C64H110O6	[M-H]-	973.823	0.26	['TG(17:0/22:1(11Z)/22:6(4Z,7Z,10Z,13Z,16Z,19Z))[iso6]', 'TG(17:0/22:1(13Z)/22:6(4Z,7Z,10Z,13Z,16Z,19Z))[iso6]', 'TG(17:0/22:2(13Z,16Z)/22:5(7Z,10Z,13Z,16Z,19Z))[iso6]', 'TG(17:0/22:3(10Z,13Z,16Z)/22:4(7Z,10Z,13Z,16Z))[iso6]', 'TG(17:1(9Z)/22:0/22:6(4Z,7Z,10Z,13Z,16Z,19Z))[iso6]', 'TG(17:1(9Z)/22:1(11Z)/22:5(7Z,10Z,13Z,16Z,19Z))[iso6]', 'TG(17:1(9Z)/22:1(13Z)/22:5(7Z,10Z,13Z,16Z,19Z))[iso6]', 'TG…
974.537	7823.98	0.981128	0.801449	0
974.721	7636.13	1.16713	0.818844	0
976.553	14222.5	1.10509	0.801449	0
976.738	7380.92	1.21739	0.81818	0
977.556	7173.97	1.09497	0.791258	0
978.503	8569.73	1.07355	0.791258	0
978.568	55084.4	0.962936	0.801449	0
979.572	26811.3	0.959503	0.801449	0
980.488	19571.3	1.02653	0.801449	0
980.586	19128	0.977063	0.801449	0
980.659	3155.73	0.986168	0.802357	0
980.734	12747.4	1.21082	0.890863	0
981.491	9996.07	1.00581	0.838877	0
981.589	11347.2	1.00454	0.805733	0
981.903	4275.33	1.0051	0.920486	0
982.504	23380.9	0.9889	0.811243	0
982.6	19396.2	0.919689	0.801449	0
982.75	52751.2	1.10272	0.968122	C57H105NO9	[M+Cl]-	982.748	1.85	['Plakoside A']
983.507	12732.2	0.994645	0.81818	0
983.603	10413.7	0.999929	0.801449	0
983.754	32462.5	1.09346	0.980305	0
984.52	36232.8	0.970785	0.801449	0
984.766	41755.5	1.10952	0.965685	0
984.821	5136.39	1.20672	0.863692	0
985.769	27297.2	1.14881	0.951168	0
986.537	23830.7	0.989011	0.801449	0
986.743	1052.15	0.931261	0.951168	0
986.781	140743	1.1238	0.954775	C54H106NO8P	[M+Hac-H]-	986.779	1.78	['PC(22:0/24:1(15Z))']
987.54	13996.1	1.02677	0.801449	0
987.785	88181.1	1.10064	0.966363	0
987.84	16177.9	1.18843	0.836142	C65H112O6	[M-H]-	987.839	0.97	['TG(18:0/22:1(11Z)/22:6(4Z,7Z,10Z,13Z,16Z,19Z))[iso6]', 'TG(18:0/22:1(13Z)/22:6(4Z,7Z,10Z,13Z,16Z,19Z))[iso6]', 'TG(18:0/22:2(13Z,16Z)/22:5(7Z,10Z,13Z,16Z,19Z))[iso6]', 'TG(18:0/22:3(10Z,13Z,16Z)/22:4(7Z,10Z,13Z,16Z))[iso6]', 'TG(18:1(9Z)/22:0/22:6(4Z,7Z,10Z,13Z,16Z,19Z))[iso6]', 'TG(18:1(9Z)/22:1(11Z)/22:5(7Z,10Z,13Z,16Z,19Z))[iso6]', 'TG(18:1(9Z)/22:1(13Z)/22:5(7Z,10Z,13Z,16Z,19Z))[iso6]', 'TG…
988.553	16409.7	0.978566	0.852907	0
988.702	9399.83	1.10507	0.830956	0
989.703	11547.2	1.19783	0.927881	0
989.802	26140.7	1.1529	0.951168	0
990.57	14770.4	0.979561	0.81818	0
990.718	34986.4	1.06158	0.924084	0
990.805	8858.93	1.17711	0.951106	0
991.572	7674.7	1.13734	0.801449	0
991.72	21932.8	1.06258	0.951168	0
992.585	7264.88	1.10183	0.81818	0
992.734	10910.1	1.04991	0.830956	0
994.75	9977.02	1.24564	0.801449	0
996.766	12613.1	1.34797	0.802357	0
1004.58	21781.7	1.04942	0.836142	0
1005.59	10324.2	0.80958	0.791258	0
1007.75	11625.3	1.53878	0.76838	0
1008.77	73620	1.08755	0.959477	0
1009.77	47830.5	1.11787	0.939424	0
1010.78	325130	1.08238	0.96283	0
1011.78	208921	1.08641	0.956705	0
1012.7	30459.6	1.03376	0.932248	0
1012.8	147452	1.09658	0.951168	0
1013.7	16631.8	1.04817	0.998079	0
1013.8	97905.3	1.09844	0.951168	0
1013.87	43826.9	1.10909	0.951168	0
1014.72	37191.5	1.03885	0.983488	0
1014.81	170417	1.06361	0.951168	0
1014.87	29058.3	1.08513	0.953489	0
1015.72	23401.2	1.16836	0.912352	0
1015.82	113427	1.06023	0.951168	0
1016.73	63531	1.04942	0.953489	0
1017.74	43615.8	1.05525	0.953489	0
1017.83	10825	1.40163	0.801449	0
1018.75	43419	1.02963	0.984353	0
1019.75	28702	1.08878	0.830956	0
1021.77	8602.11	1.37089	0.801449	0
1022.78	21811.8	1.16031	0.834881	0
1023.79	13706.3	1.54947	0.76838	0
1024.8	30505.3	1.09921	0.924228	0
1025.8	18057.9	1.47088	0.801449	0
1028.83	15749.9	1.24087	0.835476	0
1032.77	216022	1.1795	0.890574	0
1033.77	142680	1.16858	0.89123	0
1034.78	238677	1.20496	0.830956	0
1035.78	161661	1.18785	0.863746	0
1036.8	307695	1.17734	0.858895	0
1037.8	207667	1.17517	0.853714	0
1038.81	367614	1.18628	0.805733	0
1039.82	247204	1.16821	0.81818	0
1040.73	29418.4	1.11301	0.802357	0
1040.83	151708	1.20007	0.80334	0
1041.74	19395.4	1.05979	0.948232	0
1041.83	95117.9	1.18792	0.801449	0
1041.9	37434.9	1.16438	0.830956	0
1042.75	32943.3	1.1795	0.81818	0
1042.9	26106.3	1.20486	0.877282	0
1043.75	21297	1.23146	0.818844	0
1043.85	66708	1.1351	0.81818	0
1044.76	47722.3	1.13997	0.81818	0
1044.85	21407.6	1.15774	0.81818	0
1045.77	32497.8	1.15709	0.84191	0
1046.78	26772.4	1.17486	0.802357	0
1050.81	14019	1.86427	0.720442	0
1056.77	12866.5	1.82556	0.791258	0
1059.79	15350.7	1.56308	0.791258	0
1060.57	28561.7	1.03668	0.81818	0
1060.8	194052	1.25603	0.801449	0
1061.58	12315.3	0.722586	0.801449	0
1061.8	132552	1.26375	0.801449	0
1062.81	206502	1.29333	0.801449	0
1063.82	142890	1.27858	0.801449	0
1064.83	217865	1.28342	0.801449	0
1065.83	149241	1.26916	0.801449	0
1066.52	17036.6	0.990309	0.948232	0
1066.84	121983	1.25118	0.801449	0
1067.85	80132.8	1.22528	0.801449	0
1068.54	11075.4	1.00883	0.983488	0
1068.86	30400.1	1.43264	0.802357	C60H116NO8P	[M+Hac-H]-	1068.86	1.13	['PC(26:2(5E,9E)/26;25E,9E)']
1069.18	18489.9	1.33656	0.890574	0
1069.86	22022.1	1.24969	0.801449	0
1084.57	20108.3	1.06178	0.951168	0
1085.72	22703.2	1.08275	0.981081	0
1086.23	7648.97	1.90616	0.720442	0
1086.59	20187.8	1.05393	0.836875	0
1088.83	14417.2	2.08862	0.720442	0
1092.79	35299.3	1.02535	0.962331	0
1096.82	17830.1	1.17032	0.830956	0
1097.22	21888.7	1.03	0.979375	0
1097.72	34650.5	0.992596	0.901363	0
1098.23	34137.7	1.01863	0.791258	0
1099.24	35038.8	1.03493	0.956109	0
1099.74	48191.7	1.01257	0.954819	0
1100.24	25234.5	1.02677	0.993041	0
1100.75	27000.6	0.975529	0.81818	0
1101.76	19990	1.18638	0.801449	0
1109.72	31423.9	1.08131	0.830956	C57H106N2O16	[M+Cl]-	1109.72	0.52	['NA']
1110.73	39925.7	1.01934	0.801449	0
1111.24	35966.2	0.988112	0.801449	0
1111.74	36315.9	1.00899	0.791258	0
1113.75	18461.8	1.30465	0.801449	0
1116.79	24435.2	1.17442	0.817102	0
1118.8	27875.8	1.24229	0.801449	0
1120.82	31469.5	1.00214	0.999467	0
1142.58	20531.6	1.03786	0.953489	0
1143.25	14277.4	1.26336	0.953489	0
1202.82	11544.7	1.15296	0.753003	0
1282.83	39292.6	1.53119	0.830956	0
1439.91	48534.1	0.845561	0.730251	0
1440.91	33511.9	0.412225	0.510246	0
1450.98	78164	1.02418	0.948232	0
1452.99	47690.7	0.905707	0.843346	0
1453.99	26173.2	0.744205	0.917142	0
1461.89	29879.9	1.22514	0.801449	0
1462.89	13179	2.44409	0.0793767	0
1463.9	34180.6	1.22251	0.720442	0
1468.04	31348.2	1.21883	0.801449	0
1469.05	25319.8	0.949107	0.980936	0
1471.06	36500.6	0.865881	0.81818	0
1472.96	47538.6	1.08641	0.830956	0
1476.99	71710.5	1.05605	0.836142	0
1491.03	44237.4	1.02732	0.850475	0
1492.04	84279.4	1.08932	0.948232	0
1493.05	67950.9	1.03633	0.825882	0
1494.06	121813	1.07608	0.935064	0
1495.06	101991	1.08495	0.951106	0
1496.07	115139	1.09788	0.890574	0
1497.08	85894.5	1.04284	0.985501	0
1498.09	75113.2	1.10329	0.964973	0
1499.09	67296.8	1.05493	0.953489	0
1516.04	103784	1.19276	0.805733	0
1517.04	90651.6	1.1963	0.817102	0
1518.06	139481	1.17028	0.81818	0
1519.06	115901	1.17647	0.81818	0
1520.07	142103	1.17388	0.818844	0
1521.08	115487	1.12802	0.862206	0
1522.09	113912	1.13918	0.860466	0
1523.09	83994.6	1.15884	0.830956	0
1574.14	15315.3	1.57145	0.720442	0
1598.14	30917.5	1.00279	0.999284	0
1599.14	17751.2	1.86174	0.81818	0
1621.13	12041	2.04192	0.76838	0
a	Average intensity across all samples (n=8 control, n=6 low dose and n=8 high dose Cu exposed samples).
b	Fold change in intensity from control to high dose Cu exposed group.
c	From t-test between control and Cu exposed groups with a false discovery rate (FDR) of 5% to correct for multiple hypothesis testing.
d	Calculated for the specified ion form of the empirical formula.
e	Error between the observed and theoretical masses, presented as parts per million of the theoretical mass.
